# Supplementary material
Source: Research Square preprint supplement (doi:10.21203/rs.3.rs-9292454/v1)
Supplement: Supplementary file 1 [file 1e0d7e2f37fe262a08b19221.xlsx]

## Sheet:  ALL BSE
Company_Name	YEAR	Adjusted_Return	Adjusted_Share Traded	Gold_Price	WPI_INDEX	GDP_YEAR
3M India Ltd.	2017	0.00224146	473.218	28966.9	114.075	1.18195e+07
A B B India Ltd.	2017	0.00117762	21801.2	28966.9	114.075	1.18195e+07
A C C Ltd.	2017	0.00108224	26365.5	28966.9	114.075	1.18195e+07
A I A Engineering Ltd.	2017	0.000697658	11873.4	28966.9	114.075	1.18195e+07
A P L Apollo Tubes Ltd.	2017	0.00309182	8023.55	28966.9	114.075	1.18195e+07
A U Small Finance Bank Ltd.	2017	0.000845768	641498	28966.9	114.075	1.18195e+07
Aarti Drugs Ltd.	2017	0.00014655	2843.21	28966.9	114.075	1.18195e+07
Aarti Industries Ltd.	2017	0.00193985	13896.7	28966.9	114.075	1.18195e+07
Abbott India Ltd.	2017	0.000688667	1729.58	28966.9	114.075	1.18195e+07
Adani Enterprises Ltd.	2017	0.00313227	1.03622e+06	28966.9	114.075	1.18195e+07
Adani Ports & Special Economic Zone Ltd.	2017	0.00157142	356026	28966.9	114.075	1.18195e+07
Adani Transmission Ltd.	2017	0.00552369	208010	28966.9	114.075	1.18195e+07
Aditya Birla Capital Ltd.	2017	-0.00120385	920812	28966.9	114.075	1.18195e+07
Aditya Birla Fashion & Retail Ltd.	2017	0.000838461	184213	28966.9	114.075	1.18195e+07
Advanced Enzyme Technologies Ltd.	2017	-0.0012527	40091.5	28966.9	114.075	1.18195e+07
Aegis Logistics Ltd.	2017	0.00310739	153315	28966.9	114.075	1.18195e+07
Ajanta Pharma Ltd.	2017	-0.000769806	33718.5	28966.9	114.075	1.18195e+07
Alembic Pharmaceuticals Ltd.	2017	-0.000505896	19613.9	28966.9	114.075	1.18195e+07
Alkem Laboratories Ltd.	2017	0.00114551	7938.03	28966.9	114.075	1.18195e+07
Alkyl Amines Chemicals Ltd.	2017	0.00310544	5145.77	28966.9	114.075	1.18195e+07
Allcargo Logistics Ltd.	2017	0.000520782	232645	28966.9	114.075	1.18195e+07
Alok Industries Ltd.	2017	0.000356496	1.64045e+06	28966.9	114.075	1.18195e+07
Amara Raja Batteries Ltd.	2017	-0.00023141	50578.8	28966.9	114.075	1.18195e+07
Ambuja Cements Ltd.	2017	0.000937303	171410	28966.9	114.075	1.18195e+07
Apollo Hospitals Enterprise Ltd.	2017	2.50996e-06	23802.1	28966.9	114.075	1.18195e+07
Apollo Tyres Ltd.	2017	0.00145775	322496	28966.9	114.075	1.18195e+07
Asahi India Glass Ltd.	2017	0.0028819	27231	28966.9	114.075	1.18195e+07
Ashok Leyland Ltd.	2017	0.00155459	1.32139e+06	28966.9	114.075	1.18195e+07
Asian Paints Ltd.	2017	0.0010225	83917.5	28966.9	114.075	1.18195e+07
Astral Ltd.	2017	0.0030666	73592.7	28966.9	114.075	1.18195e+07
Astrazeneca Pharma India Ltd.	2017	0.000866547	4843.24	28966.9	114.075	1.18195e+07
Atul Ltd.	2017	0.00115039	6987.38	28966.9	114.075	1.18195e+07
Aurobindo Pharma Ltd.	2017	9.334e-05	243700	28966.9	114.075	1.18195e+07
Avanti Feeds Ltd.	2017	0.00661232	18727	28966.9	114.075	1.18195e+07
Avenue Supermarts Ltd.	2017	0.00246222	349793	28966.9	114.075	1.18195e+07
Axis Bank Ltd.	2017	0.000852728	631721	28966.9	114.075	1.18195e+07
B A S F India Ltd.	2017	0.00248776	6045.6	28966.9	114.075	1.18195e+07
B E M L Ltd.	2017	0.00190508	69357.3	28966.9	114.075	1.18195e+07
Bajaj Auto Ltd.	2017	0.000958531	29062.3	28966.9	114.075	1.18195e+07
Bajaj Electricals Ltd.	2017	0.00317373	76990.5	28966.9	114.075	1.18195e+07
Bajaj Finance Ltd.	2017	0.00277069	143163	28966.9	114.075	1.18195e+07
Bajaj Finserv Ltd.	2017	0.00221907	23675.9	28966.9	114.075	1.18195e+07
Bajaj Holdings & Invst. Ltd.	2017	0.00181007	23396.2	28966.9	114.075	1.18195e+07
Balaji Amines Ltd.	2017	0.00249305	13840.4	28966.9	114.075	1.18195e+07
Balkrishna Industries Ltd.	2017	0.00314351	230574	28966.9	114.075	1.18195e+07
Balrampur Chini Mills Ltd.	2017	2.44473e-05	212068	28966.9	114.075	1.18195e+07
Bank Of Baroda	2017	0.000302496	1.7212e+06	28966.9	114.075	1.18195e+07
Bank Of India	2017	0.0018017	531793	28966.9	114.075	1.18195e+07
Bank Of Maharashtra	2017	-0.000974948	65690.9	28966.9	114.075	1.18195e+07
Bata India Ltd.	2017	0.0019314	52128.3	28966.9	114.075	1.18195e+07
Bayer Cropscience Ltd.	2017	0.000190291	5278.44	28966.9	114.075	1.18195e+07
Berger Paints India Ltd.	2017	0.000970129	131349	28966.9	114.075	1.18195e+07
Bharat Electronics Ltd.	2017	0.00137682	317541	28966.9	114.075	1.18195e+07
Bharat Forge Ltd.	2017	0.00185909	84150.1	28966.9	114.075	1.18195e+07
Bharat Heavy Electricals Ltd.	2017	0.00043162	819187	28966.9	114.075	1.18195e+07
Bharat Petroleum Corpn. Ltd.	2017	0.000702464	204470	28966.9	114.075	1.18195e+07
Bharti Airtel Ltd.	2017	0.00224137	2.3135e+06	28966.9	114.075	1.18195e+07
Biocon Ltd.	2017	0.00214953	251560	28966.9	114.075	1.18195e+07
Birla Corporation Ltd.	2017	0.00221666	9133.27	28966.9	114.075	1.18195e+07
Birlasoft Ltd.	2017	0.00115108	152796	28966.9	114.075	1.18195e+07
Blue Dart Express Ltd.	2017	6.57804e-05	3345.75	28966.9	114.075	1.18195e+07
Blue Star Ltd.	2017	0.00205326	26601.8	28966.9	114.075	1.18195e+07
Bombay Burmah Trdg. Corpn. Ltd.	2017	0.0047251	75438.1	28966.9	114.075	1.18195e+07
Bosch Ltd.	2017	-0.000139344	2092.56	28966.9	114.075	1.18195e+07
Brigade Enterprises Ltd.	2017	0.00288126	29032.2	28966.9	114.075	1.18195e+07
Brightcom Group Ltd.	2017	-0.00153887	546055	28966.9	114.075	1.18195e+07
Britannia Industries Ltd.	2017	0.00200059	12287.1	28966.9	114.075	1.18195e+07
C C L Products (India) Ltd.	2017	0.00047106	9872.73	28966.9	114.075	1.18195e+07
C E S C Ltd.	2017	0.00196183	52472.6	28966.9	114.075	1.18195e+07
Cadila Healthcare Ltd.	2017	0.000800795	125208	28966.9	114.075	1.18195e+07
Can Fin Homes Ltd.	2017	0.00143997	28470.9	28966.9	114.075	1.18195e+07
Canara Bank	2017	0.00135949	263019	28966.9	114.075	1.18195e+07
Caplin Point Laboratories Ltd.	2017	0.00245351	17453.8	28966.9	114.075	1.18195e+07
Carborundum Universal Ltd.	2017	0.00158509	54744.1	28966.9	114.075	1.18195e+07
Castrol India Ltd.	2017	1.7784e-05	114895	28966.9	114.075	1.18195e+07
Ceat Ltd.	2017	0.0019851	79355.2	28966.9	114.075	1.18195e+07
Central Bank Of India	2017	-0.000573686	601800	28966.9	114.075	1.18195e+07
Century Plyboards (India) Ltd.	2017	0.00269067	37579.9	28966.9	114.075	1.18195e+07
Century Textiles & Inds. Ltd.	2017	0.00216493	105626	28966.9	114.075	1.18195e+07
Cera Sanitaryware Ltd.	2017	0.00244157	1497.41	28966.9	114.075	1.18195e+07
Chambal Fertilisers & Chemicals Ltd.	2017	0.00307598	220064	28966.9	114.075	1.18195e+07
Cholamandalam Financial Holdings Ltd.	2017	0.00198374	35102.1	28966.9	114.075	1.18195e+07
Cholamandalam Investment & Finance Co. Ltd.	2017	0.00120056	61306.5	28966.9	114.075	1.18195e+07
Cipla Ltd.	2017	0.000225344	147659	28966.9	114.075	1.18195e+07
City Union Bank Ltd.	2017	0.00162361	156473	28966.9	114.075	1.18195e+07
Coal India Ltd.	2017	-0.000601374	388273	28966.9	114.075	1.18195e+07
Cochin Shipyard Ltd.	2017	0.000233352	163383	28966.9	114.075	1.18195e+07
Coforge Ltd.	2017	0.00164212	27095.1	28966.9	114.075	1.18195e+07
Colgate-Palmolive (India) Ltd.	2017	0.00080466	31970.9	28966.9	114.075	1.18195e+07
Container Corpn. Of India Ltd.	2017	0.00155625	34549.6	28966.9	114.075	1.18195e+07
Coromandel International Ltd.	2017	0.00263314	50053.2	28966.9	114.075	1.18195e+07
Crisil Ltd.	2017	-0.00076012	7658.64	28966.9	114.075	1.18195e+07
Crompton Greaves Consumer Electricals Ltd.	2017	0.00230379	179459	28966.9	114.075	1.18195e+07
Cummins India Ltd.	2017	0.000274912	32504.2	28966.9	114.075	1.18195e+07
Cyient Ltd.	2017	0.00066122	33908	28966.9	114.075	1.18195e+07
D C M Shriram Ltd.	2017	0.0037112	25860.7	28966.9	114.075	1.18195e+07
D L F Ltd.	2017	0.00313627	1.0375e+06	28966.9	114.075	1.18195e+07
Dabur India Ltd.	2017	0.000951138	101668	28966.9	114.075	1.18195e+07
Deepak Nitrite Ltd.	2017	0.00349377	78157.1	28966.9	114.075	1.18195e+07
Delta Corp Ltd.	2017	0.00386981	828721	28966.9	114.075	1.18195e+07
Dilip Buildcon Ltd.	2017	0.00589363	58236.4	28966.9	114.075	1.18195e+07
Divi'S Laboratories Ltd.	2017	0.00138552	241505	28966.9	114.075	1.18195e+07
Dixon Technologies (India) Ltd.	2017	0.0014966	42161.8	28966.9	114.075	1.18195e+07
Dr. Lal Pathlabs Ltd.	2017	-0.000761412	41499.8	28966.9	114.075	1.18195e+07
Dr. Reddy'S Laboratories Ltd.	2017	-0.000979019	52026.2	28966.9	114.075	1.18195e+07
E I D-Parry (India) Ltd.	2017	0.00130327	86046.9	28966.9	114.075	1.18195e+07
E I H Ltd.	2017	0.00166395	36468	28966.9	114.075	1.18195e+07
E P L Ltd.	2017	0.00070462	10814.4	28966.9	114.075	1.18195e+07
Eclerx Services Ltd.	2017	0.000478377	10793.9	28966.9	114.075	1.18195e+07
Edelweiss Financial Services Ltd.	2017	0.00440151	1.01736e+06	28966.9	114.075	1.18195e+07
Eicher Motors Ltd.	2017	0.00119931	5182.1	28966.9	114.075	1.18195e+07
Elgi Equipments Ltd.	2017	0.00209108	11365.4	28966.9	114.075	1.18195e+07
Emami Ltd.	2017	0.00099388	21783.6	28966.9	114.075	1.18195e+07
Endurance Technologies Ltd.	2017	0.00346658	25194.7	28966.9	114.075	1.18195e+07
Engineers India Ltd.	2017	0.00102493	302638	28966.9	114.075	1.18195e+07
Equitas Holdings Ltd.	2017	-3.92998e-05	255292	28966.9	114.075	1.18195e+07
Eris Lifesciences Ltd.	2017	0.0010979	74250.9	28966.9	114.075	1.18195e+07
Escorts Ltd.	2017	0.00355663	260138	28966.9	114.075	1.18195e+07
Exide Industries Ltd.	2017	0.000794406	213337	28966.9	114.075	1.18195e+07
F D C Ltd.	2017	0.000503995	124189	28966.9	114.075	1.18195e+07
Federal Bank Ltd.	2017	0.00200335	898811	28966.9	114.075	1.18195e+07
Finolex Cables Ltd.	2017	0.00218414	24791	28966.9	114.075	1.18195e+07
Finolex Industries Ltd.	2017	0.00159549	18207.9	28966.9	114.075	1.18195e+07
Firstsource Solutions Ltd.	2017	0.000281375	700860	28966.9	114.075	1.18195e+07
Fortis Healthcare Ltd.	2017	-0.000633058	996847	28966.9	114.075	1.18195e+07
G A I L (India) Ltd.	2017	0.00163916	346260	28966.9	114.075	1.18195e+07
G M M Pfaudler Ltd.	2017	0.00164189	7550.96	28966.9	114.075	1.18195e+07
Garware Technical Fibres Ltd.	2017	0.00175257	3486.08	28966.9	114.075	1.18195e+07
General Insurance Corpn. Of India	2017	-0.000581548	153835	28966.9	114.075	1.18195e+07
Glaxosmithkline Pharmaceuticals Ltd.	2017	-0.000400639	1673.01	28966.9	114.075	1.18195e+07
Glenmark Pharmaceuticals Ltd.	2017	-0.00164024	93946.7	28966.9	114.075	1.18195e+07
Godfrey Phillips India Ltd.	2017	-0.000173595	20444.1	28966.9	114.075	1.18195e+07
Godrej Agrovet Ltd.	2017	-0.000111204	145191	28966.9	114.075	1.18195e+07
Godrej Consumer Products Ltd.	2017	0.0010691	33690.7	28966.9	114.075	1.18195e+07
Godrej Industries Ltd.	2017	0.00135834	39115.9	28966.9	114.075	1.18195e+07
Godrej Properties Ltd.	2017	0.00311562	56066.4	28966.9	114.075	1.18195e+07
Granules India Ltd.	2017	0.000842907	206321	28966.9	114.075	1.18195e+07
Graphite India Ltd.	2017	0.00915655	267243	28966.9	114.075	1.18195e+07
Grasim Industries Ltd.	2017	0.00118265	88193.3	28966.9	114.075	1.18195e+07
Great Eastern Shipping Co. Ltd.	2017	0.000296608	33472	28966.9	114.075	1.18195e+07
Grindwell Norton Ltd.	2017	0.00206201	9638.85	28966.9	114.075	1.18195e+07
Gujarat Alkalies & Chemicals Ltd.	2017	0.0031219	29574.2	28966.9	114.075	1.18195e+07
Gujarat Gas Ltd.	2017	0.00185618	13860.3	28966.9	114.075	1.18195e+07
Gujarat Narmada Valley Fertilizers & Chemicals Ltd.	2017	0.00315631	225636	28966.9	114.075	1.18195e+07
Gujarat Pipavav Port Ltd.	2017	0.000107533	160001	28966.9	114.075	1.18195e+07
Gujarat State Fertilizers & Chemicals Ltd.	2017	0.00179567	381490	28966.9	114.075	1.18195e+07
Gujarat State Petronet Ltd.	2017	0.00193739	114213	28966.9	114.075	1.18195e+07
H C L Technologies Ltd.	2017	0.000260115	198085	28966.9	114.075	1.18195e+07
H D F C Bank Ltd.	2017	0.00182879	181491	28966.9	114.075	1.18195e+07
H D F C Life Insurance Co. Ltd.	2017	0.000462614	1.31744e+06	28966.9	114.075	1.18195e+07
H E G Ltd.	2017	0.0108588	65186.1	28966.9	114.075	1.18195e+07
H F C L Ltd.	2017	0.00320103	1.9238e+06	28966.9	114.075	1.18195e+07
Hathway Cable & Datacom Ltd.	2017	0.000353147	211884	28966.9	114.075	1.18195e+07
Hatsun Agro Products Ltd.	2017	0.00330025	9754.63	28966.9	114.075	1.18195e+07
Havells India Ltd.	2017	0.00199268	95914.3	28966.9	114.075	1.18195e+07
Hero Motocorp Ltd.	2017	0.000955656	40394.8	28966.9	114.075	1.18195e+07
Hikal Ltd.	2017	0.000381815	24199.4	28966.9	114.075	1.18195e+07
Hindalco Industries Ltd.	2017	0.00219384	959557	28966.9	114.075	1.18195e+07
Hindustan Copper Ltd.	2017	0.00193776	535669	28966.9	114.075	1.18195e+07
Hindustan Petroleum Corpn. Ltd.	2017	0.00119757	308789	28966.9	114.075	1.18195e+07
Hindustan Unilever Ltd.	2017	0.00201683	114884	28966.9	114.075	1.18195e+07
Hindustan Zinc Ltd.	2017	0.000707079	187881	28966.9	114.075	1.18195e+07
Honeywell Automation India Ltd.	2017	0.00308119	333.06	28966.9	114.075	1.18195e+07
Housing & Urban Devp. Corpn. Ltd.	2017	0.000530778	1.54852e+06	28966.9	114.075	1.18195e+07
Housing Development Finance Corpn. Ltd.	2017	0.00137813	208355	28966.9	114.075	1.18195e+07
I C I C I Bank Ltd.	2017	0.00123466	1.49363e+06	28966.9	114.075	1.18195e+07
I C I C I Lombard General Insurance Co. Ltd.	2017	0.000517858	155417	28966.9	114.075	1.18195e+07
I C I C I Prudential Life Insurance Co. Ltd.	2017	0.000817692	136189	28966.9	114.075	1.18195e+07
I D B I Bank Ltd.	2017	-0.000620131	497682	28966.9	114.075	1.18195e+07
I D F C First Bank Ltd.	2017	-0.000459624	1.0314e+06	28966.9	114.075	1.18195e+07
I D F C Ltd.	2017	0.000570127	1.31081e+06	28966.9	114.075	1.18195e+07
I F B Industries Ltd.	2017	0.00442929	8727.1	28966.9	114.075	1.18195e+07
I I F L Finance Ltd.	2017	0.00376466	114344	28966.9	114.075	1.18195e+07
I R B Infrastructure Developers Ltd.	2017	0.000584194	219323	28966.9	114.075	1.18195e+07
I T C Ltd.	2017	0.000316308	1.01045e+06	28966.9	114.075	1.18195e+07
I T I Ltd.	2017	0.00416253	400904	28966.9	114.075	1.18195e+07
India Cements Ltd.	2017	0.00160633	498791	28966.9	114.075	1.18195e+07
Indiabulls Housing Finance Ltd.	2017	0.00237467	387871	28966.9	114.075	1.18195e+07
Indiabulls Real Estate Ltd.	2017	0.00434409	1.9958e+06	28966.9	114.075	1.18195e+07
Indian Bank	2017	0.00210355	128773	28966.9	114.075	1.18195e+07
Indian Energy Exchange Ltd.	2017	-4.03678e-05	29792.8	28966.9	114.075	1.18195e+07
Indian Hotels Co. Ltd.	2017	0.00104694	144306	28966.9	114.075	1.18195e+07
Indian Oil Corpn. Ltd.	2017	0.000466117	382821	28966.9	114.075	1.18195e+07
Indian Overseas Bank	2017	-0.00037194	206981	28966.9	114.075	1.18195e+07
Indoco Remedies Ltd.	2017	0.000233658	29880.7	28966.9	114.075	1.18195e+07
Indraprastha Gas Ltd.	2017	0.00231958	55653.5	28966.9	114.075	1.18195e+07
Indus Towers Ltd.	2017	0.000401006	2.27434e+06	28966.9	114.075	1.18195e+07
Indusind Bank Ltd.	2017	0.00163097	97144	28966.9	114.075	1.18195e+07
Infibeam Avenues Ltd.	2017	0.000768163	579511	28966.9	114.075	1.18195e+07
Info Edge (India) Ltd.	2017	0.00176398	20836	28966.9	114.075	1.18195e+07
Infosys Ltd.	2017	0.000177104	356015	28966.9	114.075	1.18195e+07
Inox Leisure Ltd.	2017	0.000910169	45952.5	28966.9	114.075	1.18195e+07
Intellect Design Arena Ltd.	2017	0.000839209	148396	28966.9	114.075	1.18195e+07
Interglobe Aviation Ltd.	2017	0.00152103	48198.9	28966.9	114.075	1.18195e+07
Ipca Laboratories Ltd.	2017	0.000470953	36223.6	28966.9	114.075	1.18195e+07
J B Chemicals & Pharmaceuticals Ltd.	2017	-0.000237985	17681.6	28966.9	114.075	1.18195e+07
J K Cement Ltd.	2017	0.00169747	16650.4	28966.9	114.075	1.18195e+07
J K Lakshmi Cement Ltd.	2017	0.00076757	28225.7	28966.9	114.075	1.18195e+07
J K Paper Ltd.	2017	0.00167417	156846	28966.9	114.075	1.18195e+07
J M Financial Ltd.	2017	0.00334055	282941	28966.9	114.075	1.18195e+07
J S W Energy Ltd.	2017	0.0016866	1.19779e+06	28966.9	114.075	1.18195e+07
J S W Steel Ltd.	2017	0.00199281	535746	28966.9	114.075	1.18195e+07
Jamna Auto Inds. Ltd.	2017	0.00328985	203154	28966.9	114.075	1.18195e+07
Jindal Stainless (Hisar) Ltd.	2017	0.00351854	161309	28966.9	114.075	1.18195e+07
Jindal Stainless Ltd.	2017	0.0040153	168889	28966.9	114.075	1.18195e+07
Jindal Steel & Power Ltd.	2017	0.00430876	1.49513e+06	28966.9	114.075	1.18195e+07
Jubilant Foodworks Ltd.	2017	0.00287034	67210.8	28966.9	114.075	1.18195e+07
Jubilant Pharmova Ltd.	2017	0.000852655	80555.4	28966.9	114.075	1.18195e+07
Just Dial Ltd.	2017	0.00162452	314740	28966.9	114.075	1.18195e+07
Jyothy Labs Ltd.	2017	0.00053149	20870.6	28966.9	114.075	1.18195e+07
K E C International Ltd.	2017	0.00399011	110917	28966.9	114.075	1.18195e+07
K N R Constructions Ltd.	2017	0.00261619	52208.4	28966.9	114.075	1.18195e+07
K P R Mill Ltd.	2017	0.00137349	10244.1	28966.9	114.075	1.18195e+07
K R B L Ltd.	2017	0.0026662	17155.8	28966.9	114.075	1.18195e+07
Kajaria Ceramics Ltd.	2017	0.00160655	74885.8	28966.9	114.075	1.18195e+07
Kalpataru Power Transmission Ltd.	2017	0.00233279	17940.8	28966.9	114.075	1.18195e+07
Kansai Nerolac Paints Ltd.	2017	0.00221922	19386.3	28966.9	114.075	1.18195e+07
Kei Industries Ltd.	2017	0.00439462	99861	28966.9	114.075	1.18195e+07
Kotak Mahindra Bank Ltd.	2017	0.00141243	406642	28966.9	114.075	1.18195e+07
L & T Finance Holdings Ltd.	2017	0.00270101	751353	28966.9	114.075	1.18195e+07
L & T Technology Services Ltd.	2017	0.00094658	6797.77	28966.9	114.075	1.18195e+07
L I C Housing Finance Ltd.	2017	0.000239647	151900	28966.9	114.075	1.18195e+07
Lakshmi Machine Works Ltd.	2017	0.00149343	5721.04	28966.9	114.075	1.18195e+07
Larsen & Toubro Infotech Ltd.	2017	0.00199962	11630.2	28966.9	114.075	1.18195e+07
Larsen & Toubro Ltd.	2017	0.00129356	304153	28966.9	114.075	1.18195e+07
Laurus Labs Ltd.	2017	0.000526038	34581	28966.9	114.075	1.18195e+07
Linde India Ltd.	2017	0.0016731	9225.06	28966.9	114.075	1.18195e+07
Lupin Ltd.	2017	-0.00214484	165616	28966.9	114.075	1.18195e+07
Lux Industries Ltd.	2017	0.00284743	18177.9	28966.9	114.075	1.18195e+07
M M T C Ltd.	2017	0.00070178	532367	28966.9	114.075	1.18195e+07
M O I L Ltd.	2017	0.00112318	80374.7	28966.9	114.075	1.18195e+07
M R F Ltd.	2017	0.00145704	1330.35	28966.9	114.075	1.18195e+07
Mahanagar Gas Ltd.	2017	0.00115166	23024	28966.9	114.075	1.18195e+07
Mahindra & Mahindra Financial Services Ltd.	2017	0.00223073	211685	28966.9	114.075	1.18195e+07
Mahindra & Mahindra Ltd.	2017	0.000828201	123225	28966.9	114.075	1.18195e+07
Mahindra C I E Automotive Ltd.	2017	0.00138768	58272.9	28966.9	114.075	1.18195e+07
Mahindra Holidays & Resorts India Ltd.	2017	0.000905687	51439.3	28966.9	114.075	1.18195e+07
Mahindra Logistics Ltd.	2017	7.8624e-05	99883.3	28966.9	114.075	1.18195e+07
Manappuram Finance Ltd.	2017	0.00214127	791115	28966.9	114.075	1.18195e+07
Mangalore Refinery & Petrochemicals Ltd.	2017	0.000925349	262185	28966.9	114.075	1.18195e+07
Marico Ltd.	2017	0.000900085	127296	28966.9	114.075	1.18195e+07
Maruti Suzuki India Ltd.	2017	0.00229328	49766	28966.9	114.075	1.18195e+07
Mastek Ltd.	2017	0.00309274	104144	28966.9	114.075	1.18195e+07
Max Financial Services Ltd.	2017	0.000241748	260386	28966.9	114.075	1.18195e+07
Minda Industries Ltd.	2017	0.00563557	21786.9	28966.9	114.075	1.18195e+07
Mindtree Ltd.	2017	0.000732525	44775.3	28966.9	114.075	1.18195e+07
Motilal Oswal Financial Services Ltd.	2017	0.00424413	23548.4	28966.9	114.075	1.18195e+07
Mphasis Ltd.	2017	0.00119992	15603.4	28966.9	114.075	1.18195e+07
Multi Commodity Exchange Of India Ltd.	2017	-0.00127476	47591.4	28966.9	114.075	1.18195e+07
Muthoot Finance Ltd.	2017	0.00202719	61848	28966.9	114.075	1.18195e+07
N B C C (India) Ltd.	2017	0.00151104	257258	28966.9	114.075	1.18195e+07
N C C Ltd.	2017	0.00187954	589454	28966.9	114.075	1.18195e+07
N H P C Ltd.	2017	0.000721605	681203	28966.9	114.075	1.18195e+07
N L C India Ltd.	2017	0.00134572	91847	28966.9	114.075	1.18195e+07
N M D C Ltd.	2017	0.000230133	306500	28966.9	114.075	1.18195e+07
N T P C Ltd.	2017	0.000274259	662171	28966.9	114.075	1.18195e+07
Narayana Hrudayalaya Ltd.	2017	-0.000529643	30373.6	28966.9	114.075	1.18195e+07
Natco Pharma Ltd.	2017	0.00201548	51663.2	28966.9	114.075	1.18195e+07
National Aluminium Co. Ltd.	2017	0.0010406	573888	28966.9	114.075	1.18195e+07
Navin Fluorine Intl. Ltd.	2017	0.001983	9821.66	28966.9	114.075	1.18195e+07
Nesco Ltd.	2017	0.00108767	3613.1	28966.9	114.075	1.18195e+07
Nestle India Ltd.	2017	0.00104469	6347.75	28966.9	114.075	1.18195e+07
Network18 Media & Invst. Ltd.	2017	0.00226649	368365	28966.9	114.075	1.18195e+07
New India Assurance Co. Ltd.	2017	-0.000758191	31669.3	28966.9	114.075	1.18195e+07
Nippon Life India Asset Mgmt. Ltd.	2017	0.000207538	285957	28966.9	114.075	1.18195e+07
Nocil Ltd.	2017	0.00385753	316770	28966.9	114.075	1.18195e+07
Oberoi Realty Ltd.	2017	0.00176909	50151.6	28966.9	114.075	1.18195e+07
Oil & Natural Gas Corpn. Ltd.	2017	3.85068e-05	675993	28966.9	114.075	1.18195e+07
Oil India Ltd.	2017	0.000319639	47085.9	28966.9	114.075	1.18195e+07
Oracle Financial Services Software Ltd.	2017	0.00102712	36504.4	28966.9	114.075	1.18195e+07
P C B L Ltd.	2017	0.00587821	89860.3	28966.9	114.075	1.18195e+07
P I Industries Ltd.	2017	0.000629201	38626.2	28966.9	114.075	1.18195e+07
P N B Housing Finance Ltd.	2017	0.00192515	38855.9	28966.9	114.075	1.18195e+07
P N C Infratech Ltd.	2017	0.00266606	84664.7	28966.9	114.075	1.18195e+07
P V R Ltd.	2017	0.0007722	18707.4	28966.9	114.075	1.18195e+07
Page Industries Ltd.	2017	0.00249125	1797.11	28966.9	114.075	1.18195e+07
Persistent Systems Ltd.	2017	0.000552166	14205.3	28966.9	114.075	1.18195e+07
Petronet L N G Ltd.	2017	0.00117933	720129	28966.9	114.075	1.18195e+07
Pfizer Ltd.	2017	0.000516774	2779.92	28966.9	114.075	1.18195e+07
Phoenix Mills Ltd.	2017	0.00203101	17249.1	28966.9	114.075	1.18195e+07
Pidilite Industries Ltd.	2017	0.00160224	94598.5	28966.9	114.075	1.18195e+07
Piramal Enterprises Ltd.	2017	0.00239905	22384.8	28966.9	114.075	1.18195e+07
Poly Medicure Ltd.	2017	0.00159115	18532.6	28966.9	114.075	1.18195e+07
Poonawalla Fincorp Ltd.	2017	0.00174825	177951	28966.9	114.075	1.18195e+07
Power Finance Corpn. Ltd.	2017	-0.000119301	593343	28966.9	114.075	1.18195e+07
Power Grid Corpn. Of India Ltd.	2017	0.000256481	439125	28966.9	114.075	1.18195e+07
Praj Industries Ltd.	2017	0.00114679	200844	28966.9	114.075	1.18195e+07
Prestige Estates Projects Ltd.	2017	0.00251506	35738	28966.9	114.075	1.18195e+07
Prism Johnson Ltd.	2017	0.00121127	65934.3	28966.9	114.075	1.18195e+07
Procter & Gamble Health Ltd.	2017	0.00105271	4234	28966.9	114.075	1.18195e+07
Procter & Gamble Hygiene & Health Care Ltd.	2017	0.00121268	1503.8	28966.9	114.075	1.18195e+07
Punjab National Bank	2017	0.00150083	1.23984e+06	28966.9	114.075	1.18195e+07
Quess Corp Ltd.	2017	0.00225138	16630.7	28966.9	114.075	1.18195e+07
R B L Bank Ltd.	2017	0.0016148	320054	28966.9	114.075	1.18195e+07
R E C Ltd.	2017	0.000834566	734779	28966.9	114.075	1.18195e+07
R H I Magnesita India Ltd.	2017	0.00147111	12557.2	28966.9	114.075	1.18195e+07
Radico Khaitan Ltd.	2017	0.00392233	183271	28966.9	114.075	1.18195e+07
Rain Industries Ltd.	2017	0.00771174	510405	28966.9	114.075	1.18195e+07
Rajesh Exports Ltd.	2017	0.00212094	61443.3	28966.9	114.075	1.18195e+07
Rallis India Ltd.	2017	0.00102492	77489.3	28966.9	114.075	1.18195e+07
Ramco Cements Ltd.	2017	0.00131234	26721.3	28966.9	114.075	1.18195e+07
Rashtriya Chemicals & Fertilizers Ltd.	2017	0.00283704	816211	28966.9	114.075	1.18195e+07
Ratnamani Metals & Tubes Ltd.	2017	0.00180638	3803.19	28966.9	114.075	1.18195e+07
Redington (India) Ltd.	2017	0.00246371	349091	28966.9	114.075	1.18195e+07
Relaxo Footwears Ltd.	2017	0.0021432	14208.4	28966.9	114.075	1.18195e+07
Reliance Industries Ltd.	2017	0.00211348	5.22374e+06	28966.9	114.075	1.18195e+07
S B I Life Insurance Co. Ltd.	2017	-8.28575e-05	150271	28966.9	114.075	1.18195e+07
S I S Ltd.	2017	0.00184956	26609	28966.9	114.075	1.18195e+07
S J V N Ltd.	2017	0.000478645	133874	28966.9	114.075	1.18195e+07
S K F India Ltd.	2017	0.00160713	5219.93	28966.9	114.075	1.18195e+07
S R F Ltd.	2017	0.000983009	14927.4	28966.9	114.075	1.18195e+07
Sanofi India Ltd.	2017	0.000397337	2253.16	28966.9	114.075	1.18195e+07
Saregama India Ltd.	2017	0.00530651	46138.3	28966.9	114.075	1.18195e+07
Schaeffler India Ltd.	2017	0.00157617	972.887	28966.9	114.075	1.18195e+07
Sequent Scientific Ltd.	2017	-0.000630969	54479.4	28966.9	114.075	1.18195e+07
Sheela Foam Ltd.	2017	0.00243736	4087.59	28966.9	114.075	1.18195e+07
Shilpa Medicare Ltd.	2017	-0.000546835	5775.67	28966.9	114.075	1.18195e+07
Shipping Corpn. Of India Ltd.	2017	0.00177025	304105	28966.9	114.075	1.18195e+07
Shree Cement Ltd.	2017	0.000976545	2238.9	28966.9	114.075	1.18195e+07
Shriram City Union Finance Ltd.	2017	0.000489337	4517.23	28966.9	114.075	1.18195e+07
Shriram Transport Finance Co. Ltd.	2017	0.00203847	67669.6	28966.9	114.075	1.18195e+07
Siemens Ltd.	2017	0.000436885	24099.8	28966.9	114.075	1.18195e+07
Sobha Ltd.	2017	0.0035722	65389.5	28966.9	114.075	1.18195e+07
Solar Industries India Ltd.	2017	0.00205814	12984.1	28966.9	114.075	1.18195e+07
Sonata Software Ltd.	2017	0.00129813	49178.5	28966.9	114.075	1.18195e+07
State Bank Of India	2017	0.000944808	1.61597e+06	28966.9	114.075	1.18195e+07
Steel Authority Of India Ltd.	2017	0.00234611	981444	28966.9	114.075	1.18195e+07
Sterlite Technologies Ltd.	2017	0.00440166	337395	28966.9	114.075	1.18195e+07
Strides Pharma Science Ltd.	2017	-0.000984592	59364.1	28966.9	114.075	1.18195e+07
Sudarshan Chemical Inds. Ltd.	2017	0.000482097	28499.5	28966.9	114.075	1.18195e+07
Sun Pharma Advanced Research Co. Ltd.	2017	0.00199064	99412.6	28966.9	114.075	1.18195e+07
Sun Pharmaceutical Inds. Ltd.	2017	-0.000436128	440260	28966.9	114.075	1.18195e+07
Sun T V Network Ltd.	2017	0.00258322	133543	28966.9	114.075	1.18195e+07
Sundram Fasteners Ltd.	2017	0.00278116	34408.9	28966.9	114.075	1.18195e+07
Sunteck Realty Ltd.	2017	0.00514254	76094.4	28966.9	114.075	1.18195e+07
Supreme Industries Ltd.	2017	0.00146852	11702.8	28966.9	114.075	1.18195e+07
Supreme Petrochem Ltd.	2017	0.0025164	13783.9	28966.9	114.075	1.18195e+07
Suzlon Energy Ltd.	2017	0.000357935	6.63651e+06	28966.9	114.075	1.18195e+07
Symphony Ltd.	2017	0.00161677	14097	28966.9	114.075	1.18195e+07
Syngene International Ltd.	2017	-0.000263797	93392.6	28966.9	114.075	1.18195e+07
T C I Express Ltd.	2017	0.00261389	7804.64	28966.9	114.075	1.18195e+07
T T K Prestige Ltd.	2017	0.0011913	3072.9	28966.9	114.075	1.18195e+07
T V S Motor Co. Ltd.	2017	0.00288214	100096	28966.9	114.075	1.18195e+07
Tanla Platforms Ltd.	2017	-0.00148006	141044	28966.9	114.075	1.18195e+07
Tata Chemicals Ltd.	2017	0.00146307	104040	28966.9	114.075	1.18195e+07
Tata Coffee Ltd.	2017	0.00144546	124115	28966.9	114.075	1.18195e+07
Tata Communications Ltd.	2017	0.000344266	68015.9	28966.9	114.075	1.18195e+07
Tata Consultancy Services Ltd.	2017	0.000528803	84579.5	28966.9	114.075	1.18195e+07
Tata Consumer Products Ltd.	2017	0.00375653	602287	28966.9	114.075	1.18195e+07
Tata Elxsi Ltd.	2017	0.00133747	67817.9	28966.9	114.075	1.18195e+07
Tata Investment Corpn. Ltd.	2017	0.00176169	12090.5	28966.9	114.075	1.18195e+07
Tata Motors Ltd.	2017	-0.000442802	1.10917e+06	28966.9	114.075	1.18195e+07
Tata Power Co. Ltd.	2017	0.000866611	528841	28966.9	114.075	1.18195e+07
Tata Steel Ltd.	2017	0.00240759	595004	28966.9	114.075	1.18195e+07
Tata Teleservices (Maharashtra) Ltd.	2017	0.000642572	1.17837e+06	28966.9	114.075	1.18195e+07
Teamlease Services Ltd.	2017	0.00411416	3495.64	28966.9	114.075	1.18195e+07
Tech Mahindra Ltd.	2017	0.000104582	233921	28966.9	114.075	1.18195e+07
Thermax Ltd.	2017	0.00181988	17004.8	28966.9	114.075	1.18195e+07
Thyrocare Technologies Ltd.	2017	-0.000109848	39384.4	28966.9	114.075	1.18195e+07
Timken India Ltd.	2017	0.00129296	7791.82	28966.9	114.075	1.18195e+07
Titan Company Ltd.	2017	0.00362757	133416	28966.9	114.075	1.18195e+07
Torrent Pharmaceuticals Ltd.	2017	0.000231675	94712.6	28966.9	114.075	1.18195e+07
Torrent Power Ltd.	2017	0.00186433	167040	28966.9	114.075	1.18195e+07
Trent Ltd.	2017	0.00207717	43874.2	28966.9	114.075	1.18195e+07
Trident Ltd.	2017	0.00161248	300304	28966.9	114.075	1.18195e+07
Triveni Turbine Ltd.	2017	0.000434884	20432.2	28966.9	114.075	1.18195e+07
Tube Investments Of India Ltd.	2017	4.21914e-05	67542.5	28966.9	114.075	1.18195e+07
Tv18 Broadcast Ltd.	2017	0.00200317	955790	28966.9	114.075	1.18195e+07
U P L Ltd.	2017	0.000607198	98555.8	28966.9	114.075	1.18195e+07
Uco Bank	2017	-0.000495925	148629	28966.9	114.075	1.18195e+07
Uflex Ltd.	2017	0.00226939	34254.5	28966.9	114.075	1.18195e+07
Ultratech Cement Ltd.	2017	0.00105318	17794.3	28966.9	114.075	1.18195e+07
Union Bank Of India	2017	0.000543424	544528	28966.9	114.075	1.18195e+07
United Breweries Ltd.	2017	0.00129092	23626.7	28966.9	114.075	1.18195e+07
V I P Industries Ltd.	2017	0.00422938	81658.9	28966.9	114.075	1.18195e+07
V-Guard Industries Ltd.	2017	0.00295348	149424	28966.9	114.075	1.18195e+07
V-Mart Retail Ltd.	2017	0.00463307	5451.94	28966.9	114.075	1.18195e+07
Vaibhav Global Ltd.	2017	0.00357776	435.707	28966.9	114.075	1.18195e+07
Vakrangee Ltd.	2017	0.00450188	435.707	28966.9	114.075	1.18195e+07
Vardhman Textiles Ltd.	2017	0.000799813	435.707	28966.9	114.075	1.18195e+07
Varun Beverages Ltd.	2017	0.00188474	435.707	28966.9	114.075	1.18195e+07
Vedanta Ltd.	2017	0.00163647	435.707	28966.9	114.075	1.18195e+07
Venky'S (India) Ltd.	2017	0.00732418	435.707	28966.9	114.075	1.18195e+07
Vinati Organics Ltd.	2017	0.00209775	5451.94	28966.9	114.075	1.18195e+07
Vodafone Idea Ltd.	2017	0.00156217	2.68143e+06	28966.9	114.075	1.18195e+07
Voltas Ltd.	2017	0.00274241	115158	28966.9	114.075	1.18195e+07
Wabco India Ltd.	2017	0.00134519	1839.23	28966.9	114.075	1.18195e+07
Welspun Corp Ltd.	2017	0.00231803	175267	28966.9	114.075	1.18195e+07
Welspun India Ltd.	2017	8.88135e-05	248610	28966.9	114.075	1.18195e+07
Whirlpool Of India Ltd.	2017	0.00208779	13186.5	28966.9	114.075	1.18195e+07
Wipro Ltd.	2017	0.00118243	274884	28966.9	114.075	1.18195e+07
Wockhardt Ltd.	2017	0.00135094	242819	28966.9	114.075	1.18195e+07
Yes Bank Ltd.	2017	0.00122395	359735	28966.9	114.075	1.18195e+07
Zee Entertainment Enterprises Ltd.	2017	0.000965759	149763	28966.9	114.075	1.18195e+07
Zensar Technologies Ltd.	2017	-0.000280027	5576.01	28966.9	114.075	1.18195e+07
Zydus Wellness Ltd.	2017	0.000735245	3207.88	28966.9	114.075	1.18195e+07
3M India Ltd.	2018	0.000397107	358.28	30613.6	118.942	1.25844e+07
A B B India Ltd.	2018	-0.000192517	66818.5	30613.6	118.942	1.25844e+07
A C C Ltd.	2018	-0.000582395	35049.5	30613.6	118.942	1.25844e+07
A I A Engineering Ltd.	2018	0.000391531	18960.3	30613.6	118.942	1.25844e+07
A P L Apollo Tubes Ltd.	2018	-0.0021937	6706.88	30613.6	118.942	1.25844e+07
A U Small Finance Bank Ltd.	2018	-0.000269772	172374	30613.6	118.942	1.25844e+07
Aarti Drugs Ltd.	2018	-0.000421221	3337.61	30613.6	118.942	1.25844e+07
Aarti Industries Ltd.	2018	0.000984126	18861.3	30613.6	118.942	1.25844e+07
Abbott India Ltd.	2018	0.00132104	1409.02	30613.6	118.942	1.25844e+07
Adani Enterprises Ltd.	2018	-7.25919e-05	1.0173e+06	30613.6	118.942	1.25844e+07
Adani Ports & Special Economic Zone Ltd.	2018	-9.79825e-05	673002	30613.6	118.942	1.25844e+07
Adani Transmission Ltd.	2018	-0.000230421	100597	30613.6	118.942	1.25844e+07
Aditya Birla Capital Ltd.	2018	-0.00249966	341018	30613.6	118.942	1.25844e+07
Aditya Birla Fashion & Retail Ltd.	2018	0.000672159	161699	30613.6	118.942	1.25844e+07
Advanced Enzyme Technologies Ltd.	2018	-0.00227388	39488.8	30613.6	118.942	1.25844e+07
Aegis Logistics Ltd.	2018	-0.00131078	13778	30613.6	118.942	1.25844e+07
Ajanta Pharma Ltd.	2018	-0.000889945	28374.8	30613.6	118.942	1.25844e+07
Alembic Pharmaceuticals Ltd.	2018	0.000492207	13600.5	30613.6	118.942	1.25844e+07
Alkem Laboratories Ltd.	2018	-0.000488608	15872.5	30613.6	118.942	1.25844e+07
Alkyl Amines Chemicals Ltd.	2018	0.000713208	1390.26	30613.6	118.942	1.25844e+07
Allcargo Logistics Ltd.	2018	-0.00258862	57089.8	30613.6	118.942	1.25844e+07
Alok Industries Ltd.	2018	-0.000366647	1.88847e+06	30613.6	118.942	1.25844e+07
Amara Raja Batteries Ltd.	2018	-0.000449039	24787.2	30613.6	118.942	1.25844e+07
Ambuja Cements Ltd.	2018	-0.000716463	379164	30613.6	118.942	1.25844e+07
Apollo Hospitals Enterprise Ltd.	2018	0.000220476	39747.6	30613.6	118.942	1.25844e+07
Apollo Tyres Ltd.	2018	-0.000511023	177857	30613.6	118.942	1.25844e+07
Asahi India Glass Ltd.	2018	-0.0014969	28762.1	30613.6	118.942	1.25844e+07
Ashok Leyland Ltd.	2018	-0.000749065	1.58033e+06	30613.6	118.942	1.25844e+07
Asian Paints Ltd.	2018	0.000747897	107559	30613.6	118.942	1.25844e+07
Astral Ltd.	2018	0.0012378	12188.8	30613.6	118.942	1.25844e+07
Astrazeneca Pharma India Ltd.	2018	0.00084599	4625.1	30613.6	118.942	1.25844e+07
Atul Ltd.	2018	0.000933212	3117.49	30613.6	118.942	1.25844e+07
Aurobindo Pharma Ltd.	2018	0.000342723	170570	30613.6	118.942	1.25844e+07
Avanti Feeds Ltd.	2018	-0.00327303	77870.1	30613.6	118.942	1.25844e+07
Avenue Supermarts Ltd.	2018	0.00133045	107910	30613.6	118.942	1.25844e+07
Axis Bank Ltd.	2018	0.000414618	586853	30613.6	118.942	1.25844e+07
B A S F India Ltd.	2018	-0.00124701	3002.48	30613.6	118.942	1.25844e+07
B E M L Ltd.	2018	-0.00225634	92092.3	30613.6	118.942	1.25844e+07
Bajaj Auto Ltd.	2018	-0.000780764	35326.6	30613.6	118.942	1.25844e+07
Bajaj Electricals Ltd.	2018	0.000110434	62467.1	30613.6	118.942	1.25844e+07
Bajaj Finance Ltd.	2018	0.0017385	126925	30613.6	118.942	1.25844e+07
Bajaj Finserv Ltd.	2018	0.000965155	19158.7	30613.6	118.942	1.25844e+07
Bajaj Holdings & Invst. Ltd.	2018	0.000154688	5673.35	30613.6	118.942	1.25844e+07
Balaji Amines Ltd.	2018	-0.00123582	7667.88	30613.6	118.942	1.25844e+07
Balkrishna Industries Ltd.	2018	-0.000958834	41128.8	30613.6	118.942	1.25844e+07
Balrampur Chini Mills Ltd.	2018	-0.00116094	724677	30613.6	118.942	1.25844e+07
Bank Of Baroda	2018	-0.00115488	1.7693e+06	30613.6	118.942	1.25844e+07
Bank Of India	2018	-0.00193056	844208	30613.6	118.942	1.25844e+07
Bank Of Maharashtra	2018	-0.0017675	130485	30613.6	118.942	1.25844e+07
Bata India Ltd.	2018	0.00166197	53219.5	30613.6	118.942	1.25844e+07
Bayer Cropscience Ltd.	2018	-0.000222019	1866.65	30613.6	118.942	1.25844e+07
Berger Paints India Ltd.	2018	0.000908932	81048.7	30613.6	118.942	1.25844e+07
Bharat Electronics Ltd.	2018	-0.00293835	708441	30613.6	118.942	1.25844e+07
Bharat Forge Ltd.	2018	-0.00145234	102284	30613.6	118.942	1.25844e+07
Bharat Heavy Electricals Ltd.	2018	-0.00119719	813609	30613.6	118.942	1.25844e+07
Bharat Petroleum Corpn. Ltd.	2018	-0.00130648	375361	30613.6	118.942	1.25844e+07
Bharti Airtel Ltd.	2018	-0.00203578	670903	30613.6	118.942	1.25844e+07
Biocon Ltd.	2018	0.000612305	193776	30613.6	118.942	1.25844e+07
Birla Corporation Ltd.	2018	-0.00291727	16695.9	30613.6	118.942	1.25844e+07
Birlasoft Ltd.	2018	0.000563384	150123	30613.6	118.942	1.25844e+07
Blue Dart Express Ltd.	2018	-0.00137599	1675.41	30613.6	118.942	1.25844e+07
Blue Star Ltd.	2018	-0.00112922	15745.7	30613.6	118.942	1.25844e+07
Bombay Burmah Trdg. Corpn. Ltd.	2018	-0.00084234	33396.9	30613.6	118.942	1.25844e+07
Bosch Ltd.	2018	-2.01375e-05	1075.61	30613.6	118.942	1.25844e+07
Brigade Enterprises Ltd.	2018	-0.00137079	11670.3	30613.6	118.942	1.25844e+07
Brightcom Group Ltd.	2018	-0.00334865	524087	30613.6	118.942	1.25844e+07
Britannia Industries Ltd.	2018	0.00117931	13423.9	30613.6	118.942	1.25844e+07
C C L Products (India) Ltd.	2018	-0.00040892	9998.78	30613.6	118.942	1.25844e+07
C E S C Ltd.	2018	-0.00184523	35341.7	30613.6	118.942	1.25844e+07
Cadila Healthcare Ltd.	2018	-0.0008483	137475	30613.6	118.942	1.25844e+07
Can Fin Homes Ltd.	2018	-0.00202192	106732	30613.6	118.942	1.25844e+07
Canara Bank	2018	-0.00100523	431164	30613.6	118.942	1.25844e+07
Caplin Point Laboratories Ltd.	2018	-0.00204339	7420.55	30613.6	118.942	1.25844e+07
Carborundum Universal Ltd.	2018	-0.000180428	27675.5	30613.6	118.942	1.25844e+07
Castrol India Ltd.	2018	-0.000944226	142227	30613.6	118.942	1.25844e+07
Ceat Ltd.	2018	-0.00156428	45811.4	30613.6	118.942	1.25844e+07
Central Bank Of India	2018	-0.00289448	322519	30613.6	118.942	1.25844e+07
Century Plyboards (India) Ltd.	2018	-0.00262279	38285.5	30613.6	118.942	1.25844e+07
Century Textiles & Inds. Ltd.	2018	-0.0017167	75738.5	30613.6	118.942	1.25844e+07
Cera Sanitaryware Ltd.	2018	-0.00189982	815.264	30613.6	118.942	1.25844e+07
Chambal Fertilisers & Chemicals Ltd.	2018	-0.000238836	110736	30613.6	118.942	1.25844e+07
Cholamandalam Financial Holdings Ltd.	2018	-0.00119653	20882.1	30613.6	118.942	1.25844e+07
Cholamandalam Investment & Finance Co. Ltd.	2018	-0.000104921	26299.4	30613.6	118.942	1.25844e+07
Cipla Ltd.	2018	-0.000627857	187352	30613.6	118.942	1.25844e+07
City Union Bank Ltd.	2018	0.000763684	105612	30613.6	118.942	1.25844e+07
Coal India Ltd.	2018	-0.000471375	272427	30613.6	118.942	1.25844e+07
Cochin Shipyard Ltd.	2018	-0.00153195	15323	30613.6	118.942	1.25844e+07
Coforge Ltd.	2018	0.00235378	72044.8	30613.6	118.942	1.25844e+07
Colgate-Palmolive (India) Ltd.	2018	0.000816559	34183.2	30613.6	118.942	1.25844e+07
Container Corpn. Of India Ltd.	2018	5.31483e-05	29101.8	30613.6	118.942	1.25844e+07
Coromandel International Ltd.	2018	-0.000755721	23233.5	30613.6	118.942	1.25844e+07
Crisil Ltd.	2018	-0.000632274	2026.33	30613.6	118.942	1.25844e+07
Crompton Greaves Consumer Electricals Ltd.	2018	-0.000822063	103623	30613.6	118.942	1.25844e+07
Cummins India Ltd.	2018	-0.000334301	62558.3	30613.6	118.942	1.25844e+07
Cyient Ltd.	2018	0.000312456	29529.3	30613.6	118.942	1.25844e+07
D C M Shriram Ltd.	2018	-0.00186574	38135.5	30613.6	118.942	1.25844e+07
D L F Ltd.	2018	-0.00145676	510862	30613.6	118.942	1.25844e+07
Dabur India Ltd.	2018	0.000852051	193028	30613.6	118.942	1.25844e+07
Deepak Nitrite Ltd.	2018	-0.000217654	59357.5	30613.6	118.942	1.25844e+07
Delta Corp Ltd.	2018	-0.000666854	478281	30613.6	118.942	1.25844e+07
Dilip Buildcon Ltd.	2018	-0.00345555	60814.1	30613.6	118.942	1.25844e+07
Divi'S Laboratories Ltd.	2018	0.00128987	48043.2	30613.6	118.942	1.25844e+07
Dixon Technologies (India) Ltd.	2018	-0.00283931	6261.86	30613.6	118.942	1.25844e+07
Dr. Lal Pathlabs Ltd.	2018	0.000150343	13804	30613.6	118.942	1.25844e+07
Dr. Reddy'S Laboratories Ltd.	2018	0.000338848	78813.4	30613.6	118.942	1.25844e+07
E I D-Parry (India) Ltd.	2018	-0.00249553	34563.3	30613.6	118.942	1.25844e+07
E I H Ltd.	2018	0.00121223	65156.3	30613.6	118.942	1.25844e+07
E P L Ltd.	2018	-0.00116656	16344	30613.6	118.942	1.25844e+07
Eclerx Services Ltd.	2018	-0.00153772	3348.62	30613.6	118.942	1.25844e+07
Edelweiss Financial Services Ltd.	2018	-0.00182728	335886	30613.6	118.942	1.25844e+07
Eicher Motors Ltd.	2018	-0.000869985	4439.58	30613.6	118.942	1.25844e+07
Elgi Equipments Ltd.	2018	-0.000467281	26838.5	30613.6	118.942	1.25844e+07
Emami Ltd.	2018	-0.00182668	35133.1	30613.6	118.942	1.25844e+07
Endurance Technologies Ltd.	2018	-0.000281827	6391.63	30613.6	118.942	1.25844e+07
Engineers India Ltd.	2018	-0.00178633	192172	30613.6	118.942	1.25844e+07
Equitas Holdings Ltd.	2018	-0.00063799	303872	30613.6	118.942	1.25844e+07
Eris Lifesciences Ltd.	2018	-0.000519862	10422.3	30613.6	118.942	1.25844e+07
Escorts Ltd.	2018	-0.000367138	138564	30613.6	118.942	1.25844e+07
Exide Industries Ltd.	2018	0.000770323	115964	30613.6	118.942	1.25844e+07
F D C Ltd.	2018	-0.0013812	12532.2	30613.6	118.942	1.25844e+07
Federal Bank Ltd.	2018	-0.000589994	1.08749e+06	30613.6	118.942	1.25844e+07
Finolex Cables Ltd.	2018	-0.00172426	10447.2	30613.6	118.942	1.25844e+07
Finolex Industries Ltd.	2018	-0.000729743	24547.4	30613.6	118.942	1.25844e+07
Firstsource Solutions Ltd.	2018	0.000612899	1.12121e+06	30613.6	118.942	1.25844e+07
Fortis Healthcare Ltd.	2018	-0.000400841	913945	30613.6	118.942	1.25844e+07
G A I L (India) Ltd.	2018	-0.000113438	224824	30613.6	118.942	1.25844e+07
G M M Pfaudler Ltd.	2018	0.00150037	2679.29	30613.6	118.942	1.25844e+07
Garware Technical Fibres Ltd.	2018	0.00115508	2980.11	30613.6	118.942	1.25844e+07
General Insurance Corpn. Of India	2018	-0.00157797	20548.8	30613.6	118.942	1.25844e+07
Glaxosmithkline Pharmaceuticals Ltd.	2018	0.00084216	2949.54	30613.6	118.942	1.25844e+07
Glenmark Pharmaceuticals Ltd.	2018	0.000630448	72628.6	30613.6	118.942	1.25844e+07
Godfrey Phillips India Ltd.	2018	-0.000435516	12923.8	30613.6	118.942	1.25844e+07
Godrej Agrovet Ltd.	2018	-0.000718554	26652.8	30613.6	118.942	1.25844e+07
Godrej Consumer Products Ltd.	2018	0.000891443	61177.9	30613.6	118.942	1.25844e+07
Godrej Industries Ltd.	2018	-0.000380905	38635.5	30613.6	118.942	1.25844e+07
Godrej Properties Ltd.	2018	-0.000325834	42827	30613.6	118.942	1.25844e+07
Granules India Ltd.	2018	-0.00164294	266414	30613.6	118.942	1.25844e+07
Graphite India Ltd.	2018	-0.000163782	215936	30613.6	118.942	1.25844e+07
Grasim Industries Ltd.	2018	-0.00129649	99099.2	30613.6	118.942	1.25844e+07
Great Eastern Shipping Co. Ltd.	2018	-0.00095499	13896.9	30613.6	118.942	1.25844e+07
Grindwell Norton Ltd.	2018	0.000118487	14739.6	30613.6	118.942	1.25844e+07
Gujarat Alkalies & Chemicals Ltd.	2018	-0.00124052	21845	30613.6	118.942	1.25844e+07
Gujarat Gas Ltd.	2018	-0.000945001	163119	30613.6	118.942	1.25844e+07
Gujarat Narmada Valley Fertilizers & Chemicals Ltd.	2018	-0.00139258	170891	30613.6	118.942	1.25844e+07
Gujarat Pipavav Port Ltd.	2018	-0.00123207	79889.8	30613.6	118.942	1.25844e+07
Gujarat State Fertilizers & Chemicals Ltd.	2018	-0.000951986	290849	30613.6	118.942	1.25844e+07
Gujarat State Petronet Ltd.	2018	-0.000986971	62594.7	30613.6	118.942	1.25844e+07
H C L Technologies Ltd.	2018	0.000310756	152569	30613.6	118.942	1.25844e+07
H D F C Bank Ltd.	2018	0.000508883	127713	30613.6	118.942	1.25844e+07
H D F C Life Insurance Co. Ltd.	2018	-7.89454e-05	160979	30613.6	118.942	1.25844e+07
H E G Ltd.	2018	0.00151955	59501.2	30613.6	118.942	1.25844e+07
H F C L Ltd.	2018	-0.00169905	1.46116e+06	30613.6	118.942	1.25844e+07
Hathway Cable & Datacom Ltd.	2018	-0.000978922	579111	30613.6	118.942	1.25844e+07
Hatsun Agro Products Ltd.	2018	-0.00108299	4360.36	30613.6	118.942	1.25844e+07
Havells India Ltd.	2018	0.000938328	179425	30613.6	118.942	1.25844e+07
Hero Motocorp Ltd.	2018	-0.000763563	28668.5	30613.6	118.942	1.25844e+07
Hikal Ltd.	2018	-7.28978e-05	60550.3	30613.6	118.942	1.25844e+07
Hindalco Industries Ltd.	2018	-0.000752067	638167	30613.6	118.942	1.25844e+07
Hindustan Copper Ltd.	2018	-0.00251821	388594	30613.6	118.942	1.25844e+07
Hindustan Petroleum Corpn. Ltd.	2018	-0.0019231	529168	30613.6	118.942	1.25844e+07
Hindustan Unilever Ltd.	2018	0.00124189	103759	30613.6	118.942	1.25844e+07
Hindustan Zinc Ltd.	2018	-0.000444505	183205	30613.6	118.942	1.25844e+07
Honeywell Automation India Ltd.	2018	0.000602998	329.435	30613.6	118.942	1.25844e+07
Housing & Urban Devp. Corpn. Ltd.	2018	-0.00262135	282946	30613.6	118.942	1.25844e+07
Housing Development Finance Corpn. Ltd.	2018	0.000594309	219992	30613.6	118.942	1.25844e+07
I C I C I Bank Ltd.	2018	0.000617699	1.38436e+06	30613.6	118.942	1.25844e+07
I C I C I Lombard General Insurance Co. Ltd.	2018	0.000323127	102163	30613.6	118.942	1.25844e+07
I C I C I Prudential Life Insurance Co. Ltd.	2018	-0.000593324	95638.6	30613.6	118.942	1.25844e+07
I D B I Bank Ltd.	2018	0.00012799	2.47997e+06	30613.6	118.942	1.25844e+07
I D F C First Bank Ltd.	2018	-0.000888311	988335	30613.6	118.942	1.25844e+07
I D F C Ltd.	2018	-0.00138764	566804	30613.6	118.942	1.25844e+07
I F B Industries Ltd.	2018	-0.00182035	2558.85	30613.6	118.942	1.25844e+07
I I F L Finance Ltd.	2018	-0.00104093	25351.2	30613.6	118.942	1.25844e+07
I R B Infrastructure Developers Ltd.	2018	-0.00136529	165142	30613.6	118.942	1.25844e+07
I T C Ltd.	2018	0.00031031	780986	30613.6	118.942	1.25844e+07
I T I Ltd.	2018	-0.00177684	193839	30613.6	118.942	1.25844e+07
India Cements Ltd.	2018	-0.00256124	447131	30613.6	118.942	1.25844e+07
Indiabulls Housing Finance Ltd.	2018	-0.00133001	393917	30613.6	118.942	1.25844e+07
Indiabulls Real Estate Ltd.	2018	-0.00367976	879236	30613.6	118.942	1.25844e+07
Indian Bank	2018	-0.00175627	119073	30613.6	118.942	1.25844e+07
Indian Energy Exchange Ltd.	2018	0.000148919	21849.6	30613.6	118.942	1.25844e+07
Indian Hotels Co. Ltd.	2018	0.000885216	481251	30613.6	118.942	1.25844e+07
Indian Oil Corpn. Ltd.	2018	-0.00139479	878632	30613.6	118.942	1.25844e+07
Indian Overseas Bank	2018	-0.00164914	81061.6	30613.6	118.942	1.25844e+07
Indoco Remedies Ltd.	2018	-0.00104715	40155.5	30613.6	118.942	1.25844e+07
Indraprastha Gas Ltd.	2018	-0.000924246	147143	30613.6	118.942	1.25844e+07
Indus Towers Ltd.	2018	-0.00152505	185636	30613.6	118.942	1.25844e+07
Indusind Bank Ltd.	2018	-0.000111828	66739.2	30613.6	118.942	1.25844e+07
Infibeam Avenues Ltd.	2018	-0.00449325	1.56126e+06	30613.6	118.942	1.25844e+07
Info Edge (India) Ltd.	2018	0.000276588	14556.9	30613.6	118.942	1.25844e+07
Infosys Ltd.	2018	0.00100948	399766	30613.6	118.942	1.25844e+07
Inox Leisure Ltd.	2018	-0.000545486	47488.7	30613.6	118.942	1.25844e+07
Intellect Design Arena Ltd.	2018	0.00135139	125430	30613.6	118.942	1.25844e+07
Interglobe Aviation Ltd.	2018	-0.00012803	78121.9	30613.6	118.942	1.25844e+07
Ipca Laboratories Ltd.	2018	0.00125758	29936.3	30613.6	118.942	1.25844e+07
J B Chemicals & Pharmaceuticals Ltd.	2018	-0.000290667	10570.4	30613.6	118.942	1.25844e+07
J K Cement Ltd.	2018	-0.00181059	8782.33	30613.6	118.942	1.25844e+07
J K Lakshmi Cement Ltd.	2018	-0.00164961	14879	30613.6	118.942	1.25844e+07
J K Paper Ltd.	2018	0.000425472	140719	30613.6	118.942	1.25844e+07
J M Financial Ltd.	2018	-0.00206303	157431	30613.6	118.942	1.25844e+07
J S W Energy Ltd.	2018	-0.00108216	319102	30613.6	118.942	1.25844e+07
J S W Steel Ltd.	2018	0.000597312	324105	30613.6	118.942	1.25844e+07
Jamna Auto Inds. Ltd.	2018	-0.00093082	243465	30613.6	118.942	1.25844e+07
Jindal Stainless (Hisar) Ltd.	2018	-0.00352892	156921	30613.6	118.942	1.25844e+07
Jindal Stainless Ltd.	2018	-0.00462686	105276	30613.6	118.942	1.25844e+07
Jindal Steel & Power Ltd.	2018	-0.000853689	1.09732e+06	30613.6	118.942	1.25844e+07
Jubilant Foodworks Ltd.	2018	0.00135619	90817.3	30613.6	118.942	1.25844e+07
Jubilant Pharmova Ltd.	2018	-0.000281852	77539.2	30613.6	118.942	1.25844e+07
Just Dial Ltd.	2018	-0.000122902	364712	30613.6	118.942	1.25844e+07
Jyothy Labs Ltd.	2018	0.000485096	42557.4	30613.6	118.942	1.25844e+07
K E C International Ltd.	2018	-0.000955354	76074.7	30613.6	118.942	1.25844e+07
K N R Constructions Ltd.	2018	-0.00150102	26247.2	30613.6	118.942	1.25844e+07
K P R Mill Ltd.	2018	-0.00151037	6298.51	30613.6	118.942	1.25844e+07
K R B L Ltd.	2018	-0.00305766	50097.6	30613.6	118.942	1.25844e+07
Kajaria Ceramics Ltd.	2018	-0.00150967	45523.7	30613.6	118.942	1.25844e+07
Kalpataru Power Transmission Ltd.	2018	-0.000783398	18050.6	30613.6	118.942	1.25844e+07
Kansai Nerolac Paints Ltd.	2018	-0.000554063	17888.6	30613.6	118.942	1.25844e+07
Kei Industries Ltd.	2018	-0.000156666	33633.5	30613.6	118.942	1.25844e+07
Kotak Mahindra Bank Ltd.	2018	0.00091195	156398	30613.6	118.942	1.25844e+07
L & T Finance Holdings Ltd.	2018	-0.000441475	707960	30613.6	118.942	1.25844e+07
L & T Technology Services Ltd.	2018	0.00180077	15977.7	30613.6	118.942	1.25844e+07
L I C Housing Finance Ltd.	2018	-0.000574465	124553	30613.6	118.942	1.25844e+07
Lakshmi Machine Works Ltd.	2018	-5.18031e-05	4317.31	30613.6	118.942	1.25844e+07
Larsen & Toubro Infotech Ltd.	2018	0.0016572	26974.1	30613.6	118.942	1.25844e+07
Larsen & Toubro Ltd.	2018	0.000573893	203201	30613.6	118.942	1.25844e+07
Laurus Labs Ltd.	2018	-0.00139156	24426.4	30613.6	118.942	1.25844e+07
Linde India Ltd.	2018	0.00109147	12385.5	30613.6	118.942	1.25844e+07
Lupin Ltd.	2018	-0.000142183	182708	30613.6	118.942	1.25844e+07
Lux Industries Ltd.	2018	-0.000339903	4288.87	30613.6	118.942	1.25844e+07
M M T C Ltd.	2018	-0.00173015	328722	30613.6	118.942	1.25844e+07
M O I L Ltd.	2018	-0.00134661	40741.2	30613.6	118.942	1.25844e+07
M R F Ltd.	2018	-0.000243086	614.756	30613.6	118.942	1.25844e+07
Mahanagar Gas Ltd.	2018	-0.000766207	51527.8	30613.6	118.942	1.25844e+07
Mahindra & Mahindra Financial Services Ltd.	2018	9.69542e-05	144497	30613.6	118.942	1.25844e+07
Mahindra & Mahindra Ltd.	2018	0.000267582	174074	30613.6	118.942	1.25844e+07
Mahindra C I E Automotive Ltd.	2018	7.29714e-05	75673.8	30613.6	118.942	1.25844e+07
Mahindra Holidays & Resorts India Ltd.	2018	-0.00184938	23059	30613.6	118.942	1.25844e+07
Mahindra Logistics Ltd.	2018	0.000605597	17638.5	30613.6	118.942	1.25844e+07
Manappuram Finance Ltd.	2018	-0.00101552	329547	30613.6	118.942	1.25844e+07
Mangalore Refinery & Petrochemicals Ltd.	2018	-0.00204258	182976	30613.6	118.942	1.25844e+07
Marico Ltd.	2018	0.000581377	152277	30613.6	118.942	1.25844e+07
Maruti Suzuki India Ltd.	2018	-0.00100069	51681.1	30613.6	118.942	1.25844e+07
Mastek Ltd.	2018	0.000801387	50119	30613.6	118.942	1.25844e+07
Max Financial Services Ltd.	2018	-0.00110444	81971.1	30613.6	118.942	1.25844e+07
Minda Industries Ltd.	2018	-0.00109938	16493.4	30613.6	118.942	1.25844e+07
Mindtree Ltd.	2018	0.00145155	89074	30613.6	118.942	1.25844e+07
Motilal Oswal Financial Services Ltd.	2018	-0.00309331	12715.2	30613.6	118.942	1.25844e+07
Mphasis Ltd.	2018	0.00131757	31230.4	30613.6	118.942	1.25844e+07
Multi Commodity Exchange Of India Ltd.	2018	-0.000861587	64599	30613.6	118.942	1.25844e+07
Muthoot Finance Ltd.	2018	0.000481449	71268.8	30613.6	118.942	1.25844e+07
N B C C (India) Ltd.	2018	-0.00303542	473602	30613.6	118.942	1.25844e+07
N C C Ltd.	2018	-0.0015956	753200	30613.6	118.942	1.25844e+07
N H P C Ltd.	2018	-0.000824963	380039	30613.6	118.942	1.25844e+07
N L C India Ltd.	2018	-0.00181312	57172.1	30613.6	118.942	1.25844e+07
N M D C Ltd.	2018	-0.00173393	264217	30613.6	118.942	1.25844e+07
N T P C Ltd.	2018	-0.000749777	448657	30613.6	118.942	1.25844e+07
Narayana Hrudayalaya Ltd.	2018	-0.00172273	17619.4	30613.6	118.942	1.25844e+07
Natco Pharma Ltd.	2018	-0.00142907	24044.8	30613.6	118.942	1.25844e+07
National Aluminium Co. Ltd.	2018	-0.00106533	1.02473e+06	30613.6	118.942	1.25844e+07
Navin Fluorine Intl. Ltd.	2018	-0.000606222	14908.3	30613.6	118.942	1.25844e+07
Nesco Ltd.	2018	-0.000772052	6781.92	30613.6	118.942	1.25844e+07
Nestle India Ltd.	2018	0.00140597	6304.89	30613.6	118.942	1.25844e+07
Network18 Media & Invst. Ltd.	2018	-0.00148754	196078	30613.6	118.942	1.25844e+07
New India Assurance Co. Ltd.	2018	-0.00212559	5627.54	30613.6	118.942	1.25844e+07
Nippon Life India Asset Mgmt. Ltd.	2018	-0.00239986	27162.9	30613.6	118.942	1.25844e+07
Nocil Ltd.	2018	-0.000370551	191796	30613.6	118.942	1.25844e+07
Oberoi Realty Ltd.	2018	-0.000322356	41954.8	30613.6	118.942	1.25844e+07
Oil & Natural Gas Corpn. Ltd.	2018	-0.00110155	512535	30613.6	118.942	1.25844e+07
Oil India Ltd.	2018	-0.0014217	55662.9	30613.6	118.942	1.25844e+07
Oracle Financial Services Software Ltd.	2018	-0.000295207	11224.2	30613.6	118.942	1.25844e+07
P C B L Ltd.	2018	6.50547e-05	138812	30613.6	118.942	1.25844e+07
P I Industries Ltd.	2018	-0.000390823	22463.5	30613.6	118.942	1.25844e+07
P N B Housing Finance Ltd.	2018	-0.00143149	55757.4	30613.6	118.942	1.25844e+07
P N C Infratech Ltd.	2018	-0.00142349	32731.9	30613.6	118.942	1.25844e+07
P V R Ltd.	2018	0.000539699	28082.5	30613.6	118.942	1.25844e+07
Page Industries Ltd.	2018	0.000119425	1634.63	30613.6	118.942	1.25844e+07
Persistent Systems Ltd.	2018	-0.000504127	18516.5	30613.6	118.942	1.25844e+07
Petronet L N G Ltd.	2018	-0.000502369	183359	30613.6	118.942	1.25844e+07
Pfizer Ltd.	2018	0.00135115	4158.35	30613.6	118.942	1.25844e+07
Phoenix Mills Ltd.	2018	-0.000492656	19645.1	30613.6	118.942	1.25844e+07
Pidilite Industries Ltd.	2018	0.000894306	39791.7	30613.6	118.942	1.25844e+07
Piramal Enterprises Ltd.	2018	-0.000698392	54565.1	30613.6	118.942	1.25844e+07
Poly Medicure Ltd.	2018	-0.000958018	5182.76	30613.6	118.942	1.25844e+07
Poonawalla Fincorp Ltd.	2018	-0.00158337	195928	30613.6	118.942	1.25844e+07
Power Finance Corpn. Ltd.	2018	-0.000582723	740526	30613.6	118.942	1.25844e+07
Power Grid Corpn. Of India Ltd.	2018	-3.14721e-05	829800	30613.6	118.942	1.25844e+07
Praj Industries Ltd.	2018	1.67401e-05	207841	30613.6	118.942	1.25844e+07
Prestige Estates Projects Ltd.	2018	-0.00156176	51927.3	30613.6	118.942	1.25844e+07
Prism Johnson Ltd.	2018	-0.00106406	161053	30613.6	118.942	1.25844e+07
Procter & Gamble Health Ltd.	2018	0.00348914	7321.68	30613.6	118.942	1.25844e+07
Procter & Gamble Hygiene & Health Care Ltd.	2018	0.00019625	1626.38	30613.6	118.942	1.25844e+07
Punjab National Bank	2018	-0.00307604	2.5306e+06	30613.6	118.942	1.25844e+07
Quess Corp Ltd.	2018	-0.00236584	17182	30613.6	118.942	1.25844e+07
R B L Bank Ltd.	2018	0.000480954	155342	30613.6	118.942	1.25844e+07
R E C Ltd.	2018	-0.00104559	511590	30613.6	118.942	1.25844e+07
R H I Magnesita India Ltd.	2018	0.00141934	26625.2	30613.6	118.942	1.25844e+07
Radico Khaitan Ltd.	2018	0.00127952	171583	30613.6	118.942	1.25844e+07
Rain Industries Ltd.	2018	-0.00443856	321201	30613.6	118.942	1.25844e+07
Rajesh Exports Ltd.	2018	-0.00145267	51937.7	30613.6	118.942	1.25844e+07
Rallis India Ltd.	2018	-0.0016094	34245.3	30613.6	118.942	1.25844e+07
Ramco Cements Ltd.	2018	-0.000767445	31887.5	30613.6	118.942	1.25844e+07
Rashtriya Chemicals & Fertilizers Ltd.	2018	-0.00163015	471262	30613.6	118.942	1.25844e+07
Ratnamani Metals & Tubes Ltd.	2018	-0.000692068	1462.94	30613.6	118.942	1.25844e+07
Redington (India) Ltd.	2018	-0.00300703	57302.5	30613.6	118.942	1.25844e+07
Relaxo Footwears Ltd.	2018	0.000368639	5532.71	30613.6	118.942	1.25844e+07
Reliance Industries Ltd.	2018	0.000841608	567252	30613.6	118.942	1.25844e+07
S B I Life Insurance Co. Ltd.	2018	-0.000564477	47651.2	30613.6	118.942	1.25844e+07
S I S Ltd.	2018	-0.00142128	12118.4	30613.6	118.942	1.25844e+07
S J V N Ltd.	2018	-0.00114156	102905	30613.6	118.942	1.25844e+07
S K F India Ltd.	2018	0.0001208	4680.17	30613.6	118.942	1.25844e+07
S R F Ltd.	2018	0.000105185	16904.7	30613.6	118.942	1.25844e+07
Sanofi India Ltd.	2018	0.0012301	1670.91	30613.6	118.942	1.25844e+07
Saregama India Ltd.	2018	-0.00113938	15042.6	30613.6	118.942	1.25844e+07
Schaeffler India Ltd.	2018	-5.41008e-05	1705.67	30613.6	118.942	1.25844e+07
Sequent Scientific Ltd.	2018	-0.00151561	103307	30613.6	118.942	1.25844e+07
Sheela Foam Ltd.	2018	-0.000571377	2860.99	30613.6	118.942	1.25844e+07
Shilpa Medicare Ltd.	2018	-0.00189912	4255.5	30613.6	118.942	1.25844e+07
Shipping Corpn. Of India Ltd.	2018	-0.00270858	145208	30613.6	118.942	1.25844e+07
Shree Cement Ltd.	2018	-0.000170682	1227.57	30613.6	118.942	1.25844e+07
Shriram City Union Finance Ltd.	2018	-0.00101433	5239.9	30613.6	118.942	1.25844e+07
Shriram Transport Finance Co. Ltd.	2018	-0.000658967	69343.2	30613.6	118.942	1.25844e+07
Siemens Ltd.	2018	-0.000750418	20574.9	30613.6	118.942	1.25844e+07
Sobha Ltd.	2018	-0.00106721	37288.6	30613.6	118.942	1.25844e+07
Solar Industries India Ltd.	2018	-0.000300918	5711.37	30613.6	118.942	1.25844e+07
Sonata Software Ltd.	2018	0.000433055	46383.6	30613.6	118.942	1.25844e+07
State Bank Of India	2018	-9.84813e-05	1.64731e+06	30613.6	118.942	1.25844e+07
Steel Authority Of India Ltd.	2018	-0.00197665	1.14311e+06	30613.6	118.942	1.25844e+07
Sterlite Technologies Ltd.	2018	3.33886e-05	263879	30613.6	118.942	1.25844e+07
Strides Pharma Science Ltd.	2018	-0.00232574	198521	30613.6	118.942	1.25844e+07
Sudarshan Chemical Inds. Ltd.	2018	-0.000569102	39924.8	30613.6	118.942	1.25844e+07
Sun Pharma Advanced Research Co. Ltd.	2018	-0.00390547	62131.3	30613.6	118.942	1.25844e+07
Sun Pharmaceutical Inds. Ltd.	2018	-0.00115028	641411	30613.6	118.942	1.25844e+07
Sun T V Network Ltd.	2018	-0.00200053	89451.3	30613.6	118.942	1.25844e+07
Sundram Fasteners Ltd.	2018	-0.000281694	15793.9	30613.6	118.942	1.25844e+07
Sunteck Realty Ltd.	2018	-0.000797078	94741.4	30613.6	118.942	1.25844e+07
Supreme Industries Ltd.	2018	-0.000419906	12849.9	30613.6	118.942	1.25844e+07
Supreme Petrochem Ltd.	2018	-0.00249029	6228.85	30613.6	118.942	1.25844e+07
Suzlon Energy Ltd.	2018	-0.00436209	3.92535e+06	30613.6	118.942	1.25844e+07
Symphony Ltd.	2018	-0.00153538	5369.22	30613.6	118.942	1.25844e+07
Syngene International Ltd.	2018	8.26744e-06	32316.6	30613.6	118.942	1.25844e+07
T C I Express Ltd.	2018	0.000393898	2279.57	30613.6	118.942	1.25844e+07
T T K Prestige Ltd.	2018	-0.000187944	851.366	30613.6	118.942	1.25844e+07
T V S Motor Co. Ltd.	2018	-0.00124349	124256	30613.6	118.942	1.25844e+07
Tanla Platforms Ltd.	2018	-0.000945494	76218.9	30613.6	118.942	1.25844e+07
Tata Chemicals Ltd.	2018	-0.000113448	61597.7	30613.6	118.942	1.25844e+07
Tata Coffee Ltd.	2018	-0.00216391	71576.8	30613.6	118.942	1.25844e+07
Tata Communications Ltd.	2018	-0.00100808	47391	30613.6	118.942	1.25844e+07
Tata Consultancy Services Ltd.	2018	0.00147637	188534	30613.6	118.942	1.25844e+07
Tata Consumer Products Ltd.	2018	-0.00141958	244847	30613.6	118.942	1.25844e+07
Tata Elxsi Ltd.	2018	0.000181622	59923.4	30613.6	118.942	1.25844e+07
Tata Investment Corpn. Ltd.	2018	-2.05265e-06	7146.32	30613.6	118.942	1.25844e+07
Tata Motors Ltd.	2018	-0.00379342	1.08599e+06	30613.6	118.942	1.25844e+07
Tata Power Co. Ltd.	2018	-0.00105326	530433	30613.6	118.942	1.25844e+07
Tata Steel Ltd.	2018	-0.00129666	632350	30613.6	118.942	1.25844e+07
Tata Teleservices (Maharashtra) Ltd.	2018	-0.00238938	249124	30613.6	118.942	1.25844e+07
Teamlease Services Ltd.	2018	0.000816161	4435.6	30613.6	118.942	1.25844e+07
Tech Mahindra Ltd.	2018	0.00138931	198555	30613.6	118.942	1.25844e+07
Thermax Ltd.	2018	-0.000365154	7378.6	30613.6	118.942	1.25844e+07
Thyrocare Technologies Ltd.	2018	-0.00106032	14220.5	30613.6	118.942	1.25844e+07
Timken India Ltd.	2018	-0.00166925	4526.68	30613.6	118.942	1.25844e+07
Titan Company Ltd.	2018	0.000387483	155600	30613.6	118.942	1.25844e+07
Torrent Pharmaceuticals Ltd.	2018	0.000968802	21139.7	30613.6	118.942	1.25844e+07
Torrent Power Ltd.	2018	-0.000247127	105596	30613.6	118.942	1.25844e+07
Trent Ltd.	2018	0.000402762	22739.7	30613.6	118.942	1.25844e+07
Trident Ltd.	2018	-0.00114188	138740	30613.6	118.942	1.25844e+07
Triveni Turbine Ltd.	2018	-0.000639199	81974.1	30613.6	118.942	1.25844e+07
Tube Investments Of India Ltd.	2018	0.00114166	43147.7	30613.6	118.942	1.25844e+07
Tv18 Broadcast Ltd.	2018	-0.00184411	671240	30613.6	118.942	1.25844e+07
U P L Ltd.	2018	-7.76519e-05	150986	30613.6	118.942	1.25844e+07
Uco Bank	2018	-0.00164489	102962	30613.6	118.942	1.25844e+07
Uflex Ltd.	2018	-0.00215783	24582.1	30613.6	118.942	1.25844e+07
Ultratech Cement Ltd.	2018	-0.000248526	15127.1	30613.6	118.942	1.25844e+07
Union Bank Of India	2018	-0.00204988	702685	30613.6	118.942	1.25844e+07
United Breweries Ltd.	2018	0.00118981	45044.4	30613.6	118.942	1.25844e+07
V I P Industries Ltd.	2018	0.00160681	81947.3	30613.6	118.942	1.25844e+07
V-Guard Industries Ltd.	2018	-0.000142678	77235.3	30613.6	118.942	1.25844e+07
V-Mart Retail Ltd.	2018	0.00226366	4428.87	30613.6	118.942	1.25844e+07
Vaibhav Global Ltd.	2018	1.92603e-05	408.049	30613.6	118.942	1.25844e+07
Vakrangee Ltd.	2018	-0.0102927	408.049	30613.6	118.942	1.25844e+07
Vardhman Textiles Ltd.	2018	-0.000994196	408.049	30613.6	118.942	1.25844e+07
Varun Beverages Ltd.	2018	0.00044571	408.049	30613.6	118.942	1.25844e+07
Vedanta Ltd.	2018	-0.00195727	408.049	30613.6	118.942	1.25844e+07
Venky'S (India) Ltd.	2018	-0.000606131	408.049	30613.6	118.942	1.25844e+07
Vinati Organics Ltd.	2018	0.00208136	4428.87	30613.6	118.942	1.25844e+07
Vodafone Idea Ltd.	2018	-0.0039958	1.87514e+06	30613.6	118.942	1.25844e+07
Voltas Ltd.	2018	-0.000644407	93791.8	30613.6	118.942	1.25844e+07
Wabco India Ltd.	2018	-0.000174571	483.215	30613.6	118.942	1.25844e+07
Welspun Corp Ltd.	2018	9.31813e-05	253319	30613.6	118.942	1.25844e+07
Welspun India Ltd.	2018	-0.000738874	349765	30613.6	118.942	1.25844e+07
Whirlpool Of India Ltd.	2018	-0.000568924	6563.8	30613.6	118.942	1.25844e+07
Wipro Ltd.	2018	0.00014229	337624	30613.6	118.942	1.25844e+07
Wockhardt Ltd.	2018	-0.00220565	173754	30613.6	118.942	1.25844e+07
Yes Bank Ltd.	2018	-0.00219207	2.21417e+06	30613.6	118.942	1.25844e+07
Zee Entertainment Enterprises Ltd.	2018	-0.00079533	328912	30613.6	118.942	1.25844e+07
Zensar Technologies Ltd.	2018	0.00123506	21303.4	30613.6	118.942	1.25844e+07
Zydus Wellness Ltd.	2018	0.0011792	2383.38	30613.6	118.942	1.25844e+07
3M India Ltd.	2019	0.000236837	240.348	34862.5	121.183	1.31079e+07
A B B India Ltd.	2019	-0.000100158	13968.2	34862.5	121.183	1.31079e+07
A C C Ltd.	2019	-0.000107352	46848	34862.5	121.183	1.31079e+07
A I A Engineering Ltd.	2019	-8.89568e-06	1667.33	34862.5	121.183	1.31079e+07
A P L Apollo Tubes Ltd.	2019	0.00180759	2102.35	34862.5	121.183	1.31079e+07
A U Small Finance Bank Ltd.	2019	0.0010729	48701.9	34862.5	121.183	1.31079e+07
Aarti Drugs Ltd.	2019	7.62421e-06	1749.44	34862.5	121.183	1.31079e+07
Aarti Industries Ltd.	2019	0.000567945	9397.74	34862.5	121.183	1.31079e+07
Abbott India Ltd.	2019	0.00225031	895.498	34862.5	121.183	1.31079e+07
Adani Enterprises Ltd.	2019	0.00120607	636918	34862.5	121.183	1.31079e+07
Adani Ports & Special Economic Zone Ltd.	2019	-0.000163965	349111	34862.5	121.183	1.31079e+07
Adani Transmission Ltd.	2019	0.0020715	32678.3	34862.5	121.183	1.31079e+07
Aditya Birla Capital Ltd.	2019	0.000131254	354800	34862.5	121.183	1.31079e+07
Aditya Birla Fashion & Retail Ltd.	2019	0.000691918	79076.1	34862.5	121.183	1.31079e+07
Advanced Enzyme Technologies Ltd.	2019	-0.000249118	49646.8	34862.5	121.183	1.31079e+07
Aegis Logistics Ltd.	2019	-0.000205667	9462.31	34862.5	121.183	1.31079e+07
Ajanta Pharma Ltd.	2019	-0.000715212	17534.7	34862.5	121.183	1.31079e+07
Alembic Pharmaceuticals Ltd.	2019	-6.87196e-05	4688.47	34862.5	121.183	1.31079e+07
Alkem Laboratories Ltd.	2019	0.000121803	4862.7	34862.5	121.183	1.31079e+07
Alkyl Amines Chemicals Ltd.	2019	0.00124441	1247.27	34862.5	121.183	1.31079e+07
Allcargo Logistics Ltd.	2019	-0.000438838	12401.5	34862.5	121.183	1.31079e+07
Alok Industries Ltd.	2019	-0.00118092	1.5356e+06	34862.5	121.183	1.31079e+07
Amara Raja Batteries Ltd.	2019	-4.56585e-05	29558.2	34862.5	121.183	1.31079e+07
Ambuja Cements Ltd.	2019	-0.000448507	130773	34862.5	121.183	1.31079e+07
Apollo Hospitals Enterprise Ltd.	2019	0.00054537	56671.1	34862.5	121.183	1.31079e+07
Apollo Tyres Ltd.	2019	-0.0013888	190074	34862.5	121.183	1.31079e+07
Asahi India Glass Ltd.	2019	-0.00104556	3368.76	34862.5	121.183	1.31079e+07
Ashok Leyland Ltd.	2019	-0.000837008	1.81357e+06	34862.5	121.183	1.31079e+07
Asian Paints Ltd.	2019	0.00104999	71698.7	34862.5	121.183	1.31079e+07
Astral Ltd.	2019	0.00103871	30796.6	34862.5	121.183	1.31079e+07
Astrazeneca Pharma India Ltd.	2019	0.00249735	1801	34862.5	121.183	1.31079e+07
Atul Ltd.	2019	0.000655301	2712.6	34862.5	121.183	1.31079e+07
Aurobindo Pharma Ltd.	2019	-0.00186661	161131	34862.5	121.183	1.31079e+07
Avanti Feeds Ltd.	2019	0.00177364	48543.4	34862.5	121.183	1.31079e+07
Avenue Supermarts Ltd.	2019	0.000663134	74848.5	34862.5	121.183	1.31079e+07
Axis Bank Ltd.	2019	0.000805913	444282	34862.5	121.183	1.31079e+07
B A S F India Ltd.	2019	-0.00181509	2525.62	34862.5	121.183	1.31079e+07
B E M L Ltd.	2019	0.000260878	84808.6	34862.5	121.183	1.31079e+07
Bajaj Auto Ltd.	2019	0.000690984	29376.2	34862.5	121.183	1.31079e+07
Bajaj Electricals Ltd.	2019	-0.00142007	19855.7	34862.5	121.183	1.31079e+07
Bajaj Finance Ltd.	2019	0.00196559	109058	34862.5	121.183	1.31079e+07
Bajaj Finserv Ltd.	2019	0.00156996	15995.8	34862.5	121.183	1.31079e+07
Bajaj Holdings & Invst. Ltd.	2019	0.000592355	10591.1	34862.5	121.183	1.31079e+07
Balaji Amines Ltd.	2019	-0.000519964	4633.14	34862.5	121.183	1.31079e+07
Balkrishna Industries Ltd.	2019	0.000337549	37450.9	34862.5	121.183	1.31079e+07
Balrampur Chini Mills Ltd.	2019	0.00229473	152215	34862.5	121.183	1.31079e+07
Bank Of Baroda	2019	-0.000646887	1.45127e+06	34862.5	121.183	1.31079e+07
Bank Of India	2019	-0.00161907	896716	34862.5	121.183	1.31079e+07
Bank Of Maharashtra	2019	-0.000754131	120759	34862.5	121.183	1.31079e+07
Bata India Ltd.	2019	0.00184807	42692.7	34862.5	121.183	1.31079e+07
Bayer Cropscience Ltd.	2019	-0.000667345	1364.8	34862.5	121.183	1.31079e+07
Berger Paints India Ltd.	2019	0.00185475	90746.7	34862.5	121.183	1.31079e+07
Bharat Electronics Ltd.	2019	0.000450026	619664	34862.5	121.183	1.31079e+07
Bharat Forge Ltd.	2019	-9.80356e-05	75854.9	34862.5	121.183	1.31079e+07
Bharat Heavy Electricals Ltd.	2019	-0.00210935	1.41059e+06	34862.5	121.183	1.31079e+07
Bharat Petroleum Corpn. Ltd.	2019	0.0012896	319893	34862.5	121.183	1.31079e+07
Bharti Airtel Ltd.	2019	0.00188598	521174	34862.5	121.183	1.31079e+07
Biocon Ltd.	2019	-0.000235814	221680	34862.5	121.183	1.31079e+07
Birla Corporation Ltd.	2019	0.000151265	9219.07	34862.5	121.183	1.31079e+07
Birlasoft Ltd.	2019	-0.00455373	183510	34862.5	121.183	1.31079e+07
Blue Dart Express Ltd.	2019	-0.00173539	384.131	34862.5	121.183	1.31079e+07
Blue Star Ltd.	2019	0.00122947	6796.59	34862.5	121.183	1.31079e+07
Bombay Burmah Trdg. Corpn. Ltd.	2019	-0.000935645	25867.9	34862.5	121.183	1.31079e+07
Bosch Ltd.	2019	-0.000958588	1091.55	34862.5	121.183	1.31079e+07
Brigade Enterprises Ltd.	2019	0.00171536	11756.4	34862.5	121.183	1.31079e+07
Brightcom Group Ltd.	2019	0.00373363	455394	34862.5	121.183	1.31079e+07
Britannia Industries Ltd.	2019	-0.000117744	21666	34862.5	121.183	1.31079e+07
C C L Products (India) Ltd.	2019	-0.00118055	8142.94	34862.5	121.183	1.31079e+07
C E S C Ltd.	2019	0.000408999	15488.4	34862.5	121.183	1.31079e+07
Cadila Healthcare Ltd.	2019	-0.00126433	84914.5	34862.5	121.183	1.31079e+07
Can Fin Homes Ltd.	2019	0.00137118	63025	34862.5	121.183	1.31079e+07
Canara Bank	2019	-0.000892675	367350	34862.5	121.183	1.31079e+07
Caplin Point Laboratories Ltd.	2019	-0.000955027	5387.53	34862.5	121.183	1.31079e+07
Carborundum Universal Ltd.	2019	-0.000480181	15326.3	34862.5	121.183	1.31079e+07
Castrol India Ltd.	2019	-0.000530406	114874	34862.5	121.183	1.31079e+07
Ceat Ltd.	2019	-0.00108295	31863.7	34862.5	121.183	1.31079e+07
Central Bank Of India	2019	-0.00297476	91561.8	34862.5	121.183	1.31079e+07
Century Plyboards (India) Ltd.	2019	-0.000345407	14684	34862.5	121.183	1.31079e+07
Century Textiles & Inds. Ltd.	2019	-0.00261785	50914.2	34862.5	121.183	1.31079e+07
Cera Sanitaryware Ltd.	2019	0.000515938	828.033	34862.5	121.183	1.31079e+07
Chambal Fertilisers & Chemicals Ltd.	2019	-5.73104e-05	34026.7	34862.5	121.183	1.31079e+07
Cholamandalam Financial Holdings Ltd.	2019	-8.61033e-05	19628.4	34862.5	121.183	1.31079e+07
Cholamandalam Investment & Finance Co. Ltd.	2019	0.00087572	72603.6	34862.5	121.183	1.31079e+07
Cipla Ltd.	2019	-0.000305618	170391	34862.5	121.183	1.31079e+07
City Union Bank Ltd.	2019	0.000802369	35544.5	34862.5	121.183	1.31079e+07
Coal India Ltd.	2019	-0.000466564	336807	34862.5	121.183	1.31079e+07
Cochin Shipyard Ltd.	2019	0.000328099	11627.9	34862.5	121.183	1.31079e+07
Coforge Ltd.	2019	0.00131379	25397.6	34862.5	121.183	1.31079e+07
Colgate-Palmolive (India) Ltd.	2019	0.000463718	35912.6	34862.5	121.183	1.31079e+07
Container Corpn. Of India Ltd.	2019	0.000265526	45601.6	34862.5	121.183	1.31079e+07
Coromandel International Ltd.	2019	0.000698723	10815.2	34862.5	121.183	1.31079e+07
Crisil Ltd.	2019	0.000653833	4146.41	34862.5	121.183	1.31079e+07
Crompton Greaves Consumer Electricals Ltd.	2019	0.000137845	351067	34862.5	121.183	1.31079e+07
Cummins India Ltd.	2019	-0.00174968	28372.4	34862.5	121.183	1.31079e+07
Cyient Ltd.	2019	-0.00168921	9621.8	34862.5	121.183	1.31079e+07
D C M Shriram Ltd.	2019	0.000572725	12002	34862.5	121.183	1.31079e+07
D L F Ltd.	2019	0.00118158	733003	34862.5	121.183	1.31079e+07
Dabur India Ltd.	2019	0.000396151	99685.9	34862.5	121.183	1.31079e+07
Deepak Nitrite Ltd.	2019	0.00211871	34059.8	34862.5	121.183	1.31079e+07
Delta Corp Ltd.	2019	-0.000915118	178609	34862.5	121.183	1.31079e+07
Dilip Buildcon Ltd.	2019	-0.000147716	49516.8	34862.5	121.183	1.31079e+07
Divi'S Laboratories Ltd.	2019	0.000926518	23877.4	34862.5	121.183	1.31079e+07
Dixon Technologies (India) Ltd.	2019	0.00258289	1687.96	34862.5	121.183	1.31079e+07
Dr. Lal Pathlabs Ltd.	2019	0.00199068	6261.89	34862.5	121.183	1.31079e+07
Dr. Reddy'S Laboratories Ltd.	2019	0.000412482	27972.3	34862.5	121.183	1.31079e+07
E I D-Parry (India) Ltd.	2019	-7.62382e-05	47698.8	34862.5	121.183	1.31079e+07
E I H Ltd.	2019	-0.00115569	28949.2	34862.5	121.183	1.31079e+07
E P L Ltd.	2019	0.00192462	90919.4	34862.5	121.183	1.31079e+07
Eclerx Services Ltd.	2019	-0.00262903	5370.12	34862.5	121.183	1.31079e+07
Edelweiss Financial Services Ltd.	2019	-0.00204778	235134	34862.5	121.183	1.31079e+07
Eicher Motors Ltd.	2019	0.000252136	4988.28	34862.5	121.183	1.31079e+07
Elgi Equipments Ltd.	2019	2.80954e-05	9716.14	34862.5	121.183	1.31079e+07
Emami Ltd.	2019	-0.00126251	464753	34862.5	121.183	1.31079e+07
Endurance Technologies Ltd.	2019	-0.000581269	5230.99	34862.5	121.183	1.31079e+07
Engineers India Ltd.	2019	-0.000955506	129949	34862.5	121.183	1.31079e+07
Equitas Holdings Ltd.	2019	-0.000586377	304702	34862.5	121.183	1.31079e+07
Eris Lifesciences Ltd.	2019	-0.00141961	34958.5	34862.5	121.183	1.31079e+07
Escorts Ltd.	2019	-0.000475052	149387	34862.5	121.183	1.31079e+07
Exide Industries Ltd.	2019	-0.00137179	119968	34862.5	121.183	1.31079e+07
F D C Ltd.	2019	0.000838344	10652.9	34862.5	121.183	1.31079e+07
Federal Bank Ltd.	2019	-0.00030364	875934	34862.5	121.183	1.31079e+07
Finolex Cables Ltd.	2019	-0.000818714	9610.14	34862.5	121.183	1.31079e+07
Finolex Industries Ltd.	2019	6.33116e-05	4472.15	34862.5	121.183	1.31079e+07
Firstsource Solutions Ltd.	2019	-0.000672282	277998	34862.5	121.183	1.31079e+07
Fortis Healthcare Ltd.	2019	-0.000247357	334740	34862.5	121.183	1.31079e+07
G A I L (India) Ltd.	2019	-0.00152187	272315	34862.5	121.183	1.31079e+07
G M M Pfaudler Ltd.	2019	0.00186974	1261.85	34862.5	121.183	1.31079e+07
Garware Technical Fibres Ltd.	2019	-2.93869e-05	1630.01	34862.5	121.183	1.31079e+07
General Insurance Corpn. Of India	2019	-0.000541193	25054	34862.5	121.183	1.31079e+07
Glaxosmithkline Pharmaceuticals Ltd.	2019	0.000305411	4197.16	34862.5	121.183	1.31079e+07
Glenmark Pharmaceuticals Ltd.	2019	-0.00275001	72439.9	34862.5	121.183	1.31079e+07
Godfrey Phillips India Ltd.	2019	0.00156488	16391.7	34862.5	121.183	1.31079e+07
Godrej Agrovet Ltd.	2019	0.000151152	9077.47	34862.5	121.183	1.31079e+07
Godrej Consumer Products Ltd.	2019	-0.000673477	65649.9	34862.5	121.183	1.31079e+07
Godrej Industries Ltd.	2019	-0.000954551	20780.1	34862.5	121.183	1.31079e+07
Godrej Properties Ltd.	2019	0.00159439	40593.4	34862.5	121.183	1.31079e+07
Granules India Ltd.	2019	0.00129422	108384	34862.5	121.183	1.31079e+07
Graphite India Ltd.	2019	-0.00369052	240174	34862.5	121.183	1.31079e+07
Grasim Industries Ltd.	2019	-0.000378107	83844.1	34862.5	121.183	1.31079e+07
Great Eastern Shipping Co. Ltd.	2019	-0.000273444	18241.8	34862.5	121.183	1.31079e+07
Grindwell Norton Ltd.	2019	0.000280856	1759.52	34862.5	121.183	1.31079e+07
Gujarat Alkalies & Chemicals Ltd.	2019	-0.00107301	4775.55	34862.5	121.183	1.31079e+07
Gujarat Gas Ltd.	2019	0.00235331	66498.6	34862.5	121.183	1.31079e+07
Gujarat Narmada Valley Fertilizers & Chemicals Ltd.	2019	-0.00302214	59167.7	34862.5	121.183	1.31079e+07
Gujarat Pipavav Port Ltd.	2019	-0.000595016	36404.2	34862.5	121.183	1.31079e+07
Gujarat State Fertilizers & Chemicals Ltd.	2019	-0.00191656	110913	34862.5	121.183	1.31079e+07
Gujarat State Petronet Ltd.	2019	0.000888064	26020.1	34862.5	121.183	1.31079e+07
H C L Technologies Ltd.	2019	0.000749445	73863.5	34862.5	121.183	1.31079e+07
H D F C Bank Ltd.	2019	0.000732108	200731	34862.5	121.183	1.31079e+07
H D F C Life Insurance Co. Ltd.	2019	0.00192556	946694	34862.5	121.183	1.31079e+07
H E G Ltd.	2019	-0.00505702	53764.9	34862.5	121.183	1.31079e+07
H F C L Ltd.	2019	-0.000759601	474684	34862.5	121.183	1.31079e+07
Hathway Cable & Datacom Ltd.	2019	-0.00172209	140179	34862.5	121.183	1.31079e+07
Hatsun Agro Products Ltd.	2019	-0.00049593	7235.21	34862.5	121.183	1.31079e+07
Havells India Ltd.	2019	-0.000266733	68247.5	34862.5	121.183	1.31079e+07
Hero Motocorp Ltd.	2019	-0.000899065	35945.6	34862.5	121.183	1.31079e+07
Hikal Ltd.	2019	-0.00127165	41590.7	34862.5	121.183	1.31079e+07
Hindalco Industries Ltd.	2019	3.22361e-05	391930	34862.5	121.183	1.31079e+07
Hindustan Copper Ltd.	2019	-0.00106726	130420	34862.5	121.183	1.31079e+07
Hindustan Petroleum Corpn. Ltd.	2019	0.000128566	331758	34862.5	121.183	1.31079e+07
Hindustan Unilever Ltd.	2019	0.000306769	84350.4	34862.5	121.183	1.31079e+07
Hindustan Zinc Ltd.	2019	-0.00108418	43034.6	34862.5	121.183	1.31079e+07
Honeywell Automation India Ltd.	2019	0.000960695	339.082	34862.5	121.183	1.31079e+07
Housing & Urban Devp. Corpn. Ltd.	2019	-0.000738505	131107	34862.5	121.183	1.31079e+07
Housing Development Finance Corpn. Ltd.	2019	0.000810064	149820	34862.5	121.183	1.31079e+07
I C I C I Bank Ltd.	2019	0.00159648	1.0727e+06	34862.5	121.183	1.31079e+07
I C I C I Lombard General Insurance Co. Ltd.	2019	0.00190185	136458	34862.5	121.183	1.31079e+07
I C I C I Prudential Life Insurance Co. Ltd.	2019	0.00168191	125833	34862.5	121.183	1.31079e+07
I D B I Bank Ltd.	2019	-0.00206399	854048	34862.5	121.183	1.31079e+07
I D F C First Bank Ltd.	2019	0.00022772	1.27508e+06	34862.5	121.183	1.31079e+07
I D F C Ltd.	2019	-0.000295791	304202	34862.5	121.183	1.31079e+07
I F B Industries Ltd.	2019	-0.000986168	8551.49	34862.5	121.183	1.31079e+07
I I F L Finance Ltd.	2019	-0.00521242	30528.7	34862.5	121.183	1.31079e+07
I R B Infrastructure Developers Ltd.	2019	-0.00308883	180076	34862.5	121.183	1.31079e+07
I T C Ltd.	2019	-0.000676632	595659	34862.5	121.183	1.31079e+07
I T I Ltd.	2019	-4.17057e-05	156488	34862.5	121.183	1.31079e+07
India Cements Ltd.	2019	-0.00110939	391025	34862.5	121.183	1.31079e+07
Indiabulls Housing Finance Ltd.	2019	-0.00404069	1.67375e+06	34862.5	121.183	1.31079e+07
Indiabulls Real Estate Ltd.	2019	-0.00118437	1.11129e+06	34862.5	121.183	1.31079e+07
Indian Bank	2019	-0.0036346	109435	34862.5	121.183	1.31079e+07
Indian Energy Exchange Ltd.	2019	-0.000564849	179429	34862.5	121.183	1.31079e+07
Indian Hotels Co. Ltd.	2019	1.97926e-05	86309.7	34862.5	121.183	1.31079e+07
Indian Oil Corpn. Ltd.	2019	-0.000358937	651011	34862.5	121.183	1.31079e+07
Indian Overseas Bank	2019	-0.00112956	106177	34862.5	121.183	1.31079e+07
Indoco Remedies Ltd.	2019	-0.000587385	14506.9	34862.5	121.183	1.31079e+07
Indraprastha Gas Ltd.	2019	0.00181512	86987.4	34862.5	121.183	1.31079e+07
Indus Towers Ltd.	2019	-0.000171759	1.5302e+06	34862.5	121.183	1.31079e+07
Indusind Bank Ltd.	2019	-0.000176616	182302	34862.5	121.183	1.31079e+07
Infibeam Avenues Ltd.	2019	0.000662813	765235	34862.5	121.183	1.31079e+07
Info Edge (India) Ltd.	2019	0.0023158	15914	34862.5	121.183	1.31079e+07
Infosys Ltd.	2019	0.000364108	523209	34862.5	121.183	1.31079e+07
Inox Leisure Ltd.	2019	0.00177584	20211.3	34862.5	121.183	1.31079e+07
Intellect Design Arena Ltd.	2019	-0.00195913	46718.7	34862.5	121.183	1.31079e+07
Interglobe Aviation Ltd.	2019	0.00056045	92243.9	34862.5	121.183	1.31079e+07
Ipca Laboratories Ltd.	2019	0.00141762	17499	34862.5	121.183	1.31079e+07
J B Chemicals & Pharmaceuticals Ltd.	2019	0.00126794	8571.5	34862.5	121.183	1.31079e+07
J K Cement Ltd.	2019	0.00196467	5488.57	34862.5	121.183	1.31079e+07
J K Lakshmi Cement Ltd.	2019	-0.000461549	5086.61	34862.5	121.183	1.31079e+07
J K Paper Ltd.	2019	-0.000838148	98702.6	34862.5	121.183	1.31079e+07
J M Financial Ltd.	2019	0.000204346	114377	34862.5	121.183	1.31079e+07
J S W Energy Ltd.	2019	-5.84771e-05	76268.1	34862.5	121.183	1.31079e+07
J S W Steel Ltd.	2019	-0.000274843	358914	34862.5	121.183	1.31079e+07
Jamna Auto Inds. Ltd.	2019	-0.00128226	107527	34862.5	121.183	1.31079e+07
Jindal Stainless (Hisar) Ltd.	2019	-0.00065446	77173.6	34862.5	121.183	1.31079e+07
Jindal Stainless Ltd.	2019	0.000548048	62925.5	34862.5	121.183	1.31079e+07
Jindal Steel & Power Ltd.	2019	0.000241899	1.20738e+06	34862.5	121.183	1.31079e+07
Jubilant Foodworks Ltd.	2019	0.00117504	63749.1	34862.5	121.183	1.31079e+07
Jubilant Pharmova Ltd.	2019	-0.00112246	64767.5	34862.5	121.183	1.31079e+07
Just Dial Ltd.	2019	0.000579446	197573	34862.5	121.183	1.31079e+07
Jyothy Labs Ltd.	2019	-0.00135009	17388.2	34862.5	121.183	1.31079e+07
K E C International Ltd.	2019	2.99171e-05	43694.5	34862.5	121.183	1.31079e+07
K N R Constructions Ltd.	2019	0.000641581	7731.47	34862.5	121.183	1.31079e+07
K P R Mill Ltd.	2019	0.000668426	3364.44	34862.5	121.183	1.31079e+07
K R B L Ltd.	2019	-9.12648e-05	19648.7	34862.5	121.183	1.31079e+07
Kajaria Ceramics Ltd.	2019	0.000254082	30712.6	34862.5	121.183	1.31079e+07
Kalpataru Power Transmission Ltd.	2019	0.000311916	11346.6	34862.5	121.183	1.31079e+07
Kansai Nerolac Paints Ltd.	2019	0.000270141	11208.6	34862.5	121.183	1.31079e+07
Kei Industries Ltd.	2019	0.00101177	21045.5	34862.5	121.183	1.31079e+07
Kotak Mahindra Bank Ltd.	2019	0.00124748	179519	34862.5	121.183	1.31079e+07
L & T Finance Holdings Ltd.	2019	-0.000977802	784042	34862.5	121.183	1.31079e+07
L & T Technology Services Ltd.	2019	-0.000614559	13325.8	34862.5	121.183	1.31079e+07
L I C Housing Finance Ltd.	2019	-0.00037352	315751	34862.5	121.183	1.31079e+07
Lakshmi Machine Works Ltd.	2019	-0.00224345	1521.99	34862.5	121.183	1.31079e+07
Larsen & Toubro Infotech Ltd.	2019	5.21486e-05	15469.4	34862.5	121.183	1.31079e+07
Larsen & Toubro Ltd.	2019	-0.000382031	209892	34862.5	121.183	1.31079e+07
Laurus Labs Ltd.	2019	-0.000222564	50220.1	34862.5	121.183	1.31079e+07
Linde India Ltd.	2019	-0.000107934	16015	34862.5	121.183	1.31079e+07
Lupin Ltd.	2019	-0.000346156	80808.3	34862.5	121.183	1.31079e+07
Lux Industries Ltd.	2019	-0.000192373	9677.72	34862.5	121.183	1.31079e+07
M M T C Ltd.	2019	-0.00193463	137947	34862.5	121.183	1.31079e+07
M O I L Ltd.	2019	-0.000602952	17878.9	34862.5	121.183	1.31079e+07
M R F Ltd.	2019	-1.53309e-05	473.959	34862.5	121.183	1.31079e+07
Mahanagar Gas Ltd.	2019	0.000679377	37391.3	34862.5	121.183	1.31079e+07
Mahindra & Mahindra Financial Services Ltd.	2019	-0.00150306	127636	34862.5	121.183	1.31079e+07
Mahindra & Mahindra Ltd.	2019	-0.00135945	283241	34862.5	121.183	1.31079e+07
Mahindra C I E Automotive Ltd.	2019	-0.0016735	47831.2	34862.5	121.183	1.31079e+07
Mahindra Holidays & Resorts India Ltd.	2019	0.000320534	3873.68	34862.5	121.183	1.31079e+07
Mahindra Logistics Ltd.	2019	-0.000989759	32659.4	34862.5	121.183	1.31079e+07
Manappuram Finance Ltd.	2019	0.00266679	273046	34862.5	121.183	1.31079e+07
Mangalore Refinery & Petrochemicals Ltd.	2019	-0.00205666	77883.8	34862.5	121.183	1.31079e+07
Marico Ltd.	2019	-0.000355497	101720	34862.5	121.183	1.31079e+07
Maruti Suzuki India Ltd.	2019	5.28346e-05	71626.2	34862.5	121.183	1.31079e+07
Mastek Ltd.	2019	-0.000327268	10843.7	34862.5	121.183	1.31079e+07
Max Financial Services Ltd.	2019	0.000902307	52175.5	34862.5	121.183	1.31079e+07
Minda Industries Ltd.	2019	0.000268755	13342.7	34862.5	121.183	1.31079e+07
Mindtree Ltd.	2019	-0.000292382	190669	34862.5	121.183	1.31079e+07
Motilal Oswal Financial Services Ltd.	2019	0.000493274	14913.2	34862.5	121.183	1.31079e+07
Mphasis Ltd.	2019	-0.000289811	13425.1	34862.5	121.183	1.31079e+07
Multi Commodity Exchange Of India Ltd.	2019	0.00194383	46756.2	34862.5	121.183	1.31079e+07
Muthoot Finance Ltd.	2019	0.00169428	39844.3	34862.5	121.183	1.31079e+07
N B C C (India) Ltd.	2019	-0.00206857	950006	34862.5	121.183	1.31079e+07
N C C Ltd.	2019	-0.00190926	1.19911e+06	34862.5	121.183	1.31079e+07
N H P C Ltd.	2019	-0.000287848	199051	34862.5	121.183	1.31079e+07
N L C India Ltd.	2019	-0.000721491	39949.6	34862.5	121.183	1.31079e+07
N M D C Ltd.	2019	0.00116631	350753	34862.5	121.183	1.31079e+07
N T P C Ltd.	2019	-0.000105592	548558	34862.5	121.183	1.31079e+07
Narayana Hrudayalaya Ltd.	2019	0.00189718	45321.4	34862.5	121.183	1.31079e+07
Natco Pharma Ltd.	2019	-0.000676077	40449.6	34862.5	121.183	1.31079e+07
National Aluminium Co. Ltd.	2019	-0.00157469	665608	34862.5	121.183	1.31079e+07
Navin Fluorine Intl. Ltd.	2019	0.0014869	7591.12	34862.5	121.183	1.31079e+07
Nesco Ltd.	2019	0.00160226	4794.84	34862.5	121.183	1.31079e+07
Nestle India Ltd.	2019	0.00119317	3876.77	34862.5	121.183	1.31079e+07
Network18 Media & Invst. Ltd.	2019	-0.00207656	55575.8	34862.5	121.183	1.31079e+07
New India Assurance Co. Ltd.	2019	-0.00125668	24718.7	34862.5	121.183	1.31079e+07
Nippon Life India Asset Mgmt. Ltd.	2019	0.00326267	124829	34862.5	121.183	1.31079e+07
Nocil Ltd.	2019	-0.00194469	86131.4	34862.5	121.183	1.31079e+07
Oberoi Realty Ltd.	2019	0.000673824	42890.3	34862.5	121.183	1.31079e+07
Oil & Natural Gas Corpn. Ltd.	2019	-0.000557687	473466	34862.5	121.183	1.31079e+07
Oil India Ltd.	2019	-0.00049893	57276.1	34862.5	121.183	1.31079e+07
Oracle Financial Services Software Ltd.	2019	-0.00123231	3220.38	34862.5	121.183	1.31079e+07
P C B L Ltd.	2019	-0.00226762	118897	34862.5	121.183	1.31079e+07
P I Industries Ltd.	2019	0.00212705	15606.1	34862.5	121.183	1.31079e+07
P N B Housing Finance Ltd.	2019	-0.00305391	40911.8	34862.5	121.183	1.31079e+07
P N C Infratech Ltd.	2019	0.000974376	11298	34862.5	121.183	1.31079e+07
P V R Ltd.	2019	0.000727047	27830.9	34862.5	121.183	1.31079e+07
Page Industries Ltd.	2019	-0.000220968	3602.9	34862.5	121.183	1.31079e+07
Persistent Systems Ltd.	2019	0.000299447	10149.6	34862.5	121.183	1.31079e+07
Petronet L N G Ltd.	2019	0.000655553	171111	34862.5	121.183	1.31079e+07
Pfizer Ltd.	2019	0.00164606	3137.29	34862.5	121.183	1.31079e+07
Phoenix Mills Ltd.	2019	0.00150548	30654.7	34862.5	121.183	1.31079e+07
Pidilite Industries Ltd.	2019	0.000919222	40604.4	34862.5	121.183	1.31079e+07
Piramal Enterprises Ltd.	2019	-0.00165485	60207.3	34862.5	121.183	1.31079e+07
Poly Medicure Ltd.	2019	-0.000339775	3413.73	34862.5	121.183	1.31079e+07
Poonawalla Fincorp Ltd.	2019	-0.0027723	41278.8	34862.5	121.183	1.31079e+07
Power Finance Corpn. Ltd.	2019	0.000506599	507080	34862.5	121.183	1.31079e+07
Power Grid Corpn. Of India Ltd.	2019	-0.000110092	411631	34862.5	121.183	1.31079e+07
Praj Industries Ltd.	2019	-0.000401299	319447	34862.5	121.183	1.31079e+07
Prestige Estates Projects Ltd.	2019	0.00153678	28478.9	34862.5	121.183	1.31079e+07
Prism Johnson Ltd.	2019	-0.00137939	44250.6	34862.5	121.183	1.31079e+07
Procter & Gamble Health Ltd.	2019	0.00146515	2770.84	34862.5	121.183	1.31079e+07
Procter & Gamble Hygiene & Health Care Ltd.	2019	0.000611035	648.922	34862.5	121.183	1.31079e+07
Punjab National Bank	2019	-0.000777335	1.84302e+06	34862.5	121.183	1.31079e+07
Quess Corp Ltd.	2019	-0.00157082	27819	34862.5	121.183	1.31079e+07
R B L Bank Ltd.	2019	-0.00203018	517047	34862.5	121.183	1.31079e+07
R E C Ltd.	2019	0.000755297	376386	34862.5	121.183	1.31079e+07
R H I Magnesita India Ltd.	2019	9.16671e-05	4814.29	34862.5	121.183	1.31079e+07
Radico Khaitan Ltd.	2019	-0.000996364	39233.1	34862.5	121.183	1.31079e+07
Rain Industries Ltd.	2019	-0.0011861	159238	34862.5	121.183	1.31079e+07
Rajesh Exports Ltd.	2019	0.000640116	50933.3	34862.5	121.183	1.31079e+07
Rallis India Ltd.	2019	-0.000222979	27033.6	34862.5	121.183	1.31079e+07
Ramco Cements Ltd.	2019	0.000691182	14997.3	34862.5	121.183	1.31079e+07
Rashtriya Chemicals & Fertilizers Ltd.	2019	-0.00127906	186268	34862.5	121.183	1.31079e+07
Ratnamani Metals & Tubes Ltd.	2019	0.000623986	6816.83	34862.5	121.183	1.31079e+07
Redington (India) Ltd.	2019	0.00121816	111915	34862.5	121.183	1.31079e+07
Relaxo Footwears Ltd.	2019	0.00208943	14597.4	34862.5	121.183	1.31079e+07
Reliance Industries Ltd.	2019	0.00128083	553100	34862.5	121.183	1.31079e+07
S B I Life Insurance Co. Ltd.	2019	0.00193045	746553	34862.5	121.183	1.31079e+07
S I S Ltd.	2019	0.000902115	3056.24	34862.5	121.183	1.31079e+07
S J V N Ltd.	2019	-3.9899e-05	68318.6	34862.5	121.183	1.31079e+07
S K F India Ltd.	2019	0.000537659	3414.14	34862.5	121.183	1.31079e+07
S R F Ltd.	2019	0.00222336	19025.2	34862.5	121.183	1.31079e+07
Sanofi India Ltd.	2019	0.000476262	966.196	34862.5	121.183	1.31079e+07
Saregama India Ltd.	2019	-0.00130041	2233.72	34862.5	121.183	1.31079e+07
Schaeffler India Ltd.	2019	-0.000770048	391.098	34862.5	121.183	1.31079e+07
Sequent Scientific Ltd.	2019	0.000207686	65965.1	34862.5	121.183	1.31079e+07
Sheela Foam Ltd.	2019	-0.000857571	1215.73	34862.5	121.183	1.31079e+07
Shilpa Medicare Ltd.	2019	-0.00119908	2156.66	34862.5	121.183	1.31079e+07
Shipping Corpn. Of India Ltd.	2019	0.00112622	215731	34862.5	121.183	1.31079e+07
Shree Cement Ltd.	2019	0.000751416	1062.49	34862.5	121.183	1.31079e+07
Shriram City Union Finance Ltd.	2019	-0.00054723	2019.71	34862.5	121.183	1.31079e+07
Shriram Transport Finance Co. Ltd.	2019	-8.68582e-05	61912.2	34862.5	121.183	1.31079e+07
Siemens Ltd.	2019	0.00142166	34516.3	34862.5	121.183	1.31079e+07
Sobha Ltd.	2019	-0.000669699	49303	34862.5	121.183	1.31079e+07
Solar Industries India Ltd.	2019	-2.88848e-05	3181.04	34862.5	121.183	1.31079e+07
Sonata Software Ltd.	2019	0.000102238	7256.27	34862.5	121.183	1.31079e+07
State Bank Of India	2019	0.000519073	1.51208e+06	34862.5	121.183	1.31079e+07
Steel Authority Of India Ltd.	2019	-0.000946785	1.81612e+06	34862.5	121.183	1.31079e+07
Sterlite Technologies Ltd.	2019	-0.00370987	252359	34862.5	121.183	1.31079e+07
Strides Pharma Science Ltd.	2019	-0.000965001	117224	34862.5	121.183	1.31079e+07
Sudarshan Chemical Inds. Ltd.	2019	0.000682354	12278.9	34862.5	121.183	1.31079e+07
Sun Pharma Advanced Research Co. Ltd.	2019	-0.000812643	143153	34862.5	121.183	1.31079e+07
Sun Pharmaceutical Inds. Ltd.	2019	-7.2955e-05	507331	34862.5	121.183	1.31079e+07
Sun T V Network Ltd.	2019	-0.00129323	95958.3	34862.5	121.183	1.31079e+07
Sundram Fasteners Ltd.	2019	-0.000271132	5579	34862.5	121.183	1.31079e+07
Sunteck Realty Ltd.	2019	0.000720851	101051	34862.5	121.183	1.31079e+07
Supreme Industries Ltd.	2019	8.19288e-05	9284.09	34862.5	121.183	1.31079e+07
Supreme Petrochem Ltd.	2019	-0.00108394	5828.96	34862.5	121.183	1.31079e+07
Suzlon Energy Ltd.	2019	-0.00429806	4.43284e+06	34862.5	121.183	1.31079e+07
Symphony Ltd.	2019	-4.04183e-06	1617.74	34862.5	121.183	1.31079e+07
Syngene International Ltd.	2019	0.000610485	14096.4	34862.5	121.183	1.31079e+07
T C I Express Ltd.	2019	0.000661975	1327.7	34862.5	121.183	1.31079e+07
T T K Prestige Ltd.	2019	-0.000364046	890.898	34862.5	121.183	1.31079e+07
T V S Motor Co. Ltd.	2019	-0.000543065	110872	34862.5	121.183	1.31079e+07
Tanla Platforms Ltd.	2019	0.003347	57614.4	34862.5	121.183	1.31079e+07
Tata Chemicals Ltd.	2019	-0.000203221	50575.3	34862.5	121.183	1.31079e+07
Tata Coffee Ltd.	2019	-0.000221847	39043.2	34862.5	121.183	1.31079e+07
Tata Communications Ltd.	2019	-0.00131964	31925.3	34862.5	121.183	1.31079e+07
Tata Consultancy Services Ltd.	2019	0.000476512	143615	34862.5	121.183	1.31079e+07
Tata Consumer Products Ltd.	2019	0.00164037	191023	34862.5	121.183	1.31079e+07
Tata Elxsi Ltd.	2019	-0.000883408	66071.9	34862.5	121.183	1.31079e+07
Tata Investment Corpn. Ltd.	2019	-0.000434486	2511.01	34862.5	121.183	1.31079e+07
Tata Motors Ltd.	2019	0.000382301	2.12825e+06	34862.5	121.183	1.31079e+07
Tata Power Co. Ltd.	2019	-0.00114794	900932	34862.5	121.183	1.31079e+07
Tata Steel Ltd.	2019	-0.000184705	716216	34862.5	121.183	1.31079e+07
Tata Teleservices (Maharashtra) Ltd.	2019	-0.00232797	257852	34862.5	121.183	1.31079e+07
Teamlease Services Ltd.	2019	-0.000590323	1771.27	34862.5	121.183	1.31079e+07
Tech Mahindra Ltd.	2019	0.000281087	125152	34862.5	121.183	1.31079e+07
Thermax Ltd.	2019	-0.000207988	20049.1	34862.5	121.183	1.31079e+07
Thyrocare Technologies Ltd.	2019	3.4476e-05	3860.96	34862.5	121.183	1.31079e+07
Timken India Ltd.	2019	0.00171834	3139.38	34862.5	121.183	1.31079e+07
Titan Company Ltd.	2019	0.000990526	114235	34862.5	121.183	1.31079e+07
Torrent Pharmaceuticals Ltd.	2019	0.000172891	12516.3	34862.5	121.183	1.31079e+07
Torrent Power Ltd.	2019	0.000423818	286453	34862.5	121.183	1.31079e+07
Trent Ltd.	2019	0.00163796	19104.5	34862.5	121.183	1.31079e+07
Trident Ltd.	2019	6.05135e-06	129310	34862.5	121.183	1.31079e+07
Triveni Turbine Ltd.	2019	-0.000776886	29152.2	34862.5	121.183	1.31079e+07
Tube Investments Of India Ltd.	2019	0.00127456	46234.6	34862.5	121.183	1.31079e+07
Tv18 Broadcast Ltd.	2019	-0.00237008	396764	34862.5	121.183	1.31079e+07
U P L Ltd.	2019	0.000609786	155704	34862.5	121.183	1.31079e+07
Uco Bank	2019	-0.00114355	109574	34862.5	121.183	1.31079e+07
Uflex Ltd.	2019	-0.00132037	10746.1	34862.5	121.183	1.31079e+07
Ultratech Cement Ltd.	2019	4.77324e-05	25221.2	34862.5	121.183	1.31079e+07
Union Bank Of India	2019	-0.00194945	803955	34862.5	121.183	1.31079e+07
United Breweries Ltd.	2019	-0.00026233	57481.7	34862.5	121.183	1.31079e+07
V I P Industries Ltd.	2019	-0.000629794	34496.1	34862.5	121.183	1.31079e+07
V-Guard Industries Ltd.	2019	-0.000217475	63624	34862.5	121.183	1.31079e+07
V-Mart Retail Ltd.	2019	-0.00173864	3626.42	34862.5	121.183	1.31079e+07
Vaibhav Global Ltd.	2019	0.000634942	2142.23	34862.5	121.183	1.31079e+07
Vakrangee Ltd.	2019	0.00113868	2142.23	34862.5	121.183	1.31079e+07
Vardhman Textiles Ltd.	2019	-0.000512659	2142.23	34862.5	121.183	1.31079e+07
Varun Beverages Ltd.	2019	0.0011899	2142.23	34862.5	121.183	1.31079e+07
Vedanta Ltd.	2019	-0.000963443	2142.23	34862.5	121.183	1.31079e+07
Venky'S (India) Ltd.	2019	-0.00127521	2142.23	34862.5	121.183	1.31079e+07
Vinati Organics Ltd.	2019	0.000868238	3626.42	34862.5	121.183	1.31079e+07
Vodafone Idea Ltd.	2019	-0.00523823	1.88915e+07	34862.5	121.183	1.31079e+07
Voltas Ltd.	2019	0.000829878	71897.3	34862.5	121.183	1.31079e+07
Wabco India Ltd.	2019	-0.000211789	752.824	34862.5	121.183	1.31079e+07
Welspun Corp Ltd.	2019	0.000274352	138194	34862.5	121.183	1.31079e+07
Welspun India Ltd.	2019	-0.000987368	104469	34862.5	121.183	1.31079e+07
Whirlpool Of India Ltd.	2019	0.00215868	6504.07	34862.5	121.183	1.31079e+07
Wipro Ltd.	2019	3.53347e-05	666477	34862.5	121.183	1.31079e+07
Wockhardt Ltd.	2019	-0.00324642	127487	34862.5	121.183	1.31079e+07
Yes Bank Ltd.	2019	-0.0055893	1.12697e+07	34862.5	121.183	1.31079e+07
Zee Entertainment Enterprises Ltd.	2019	-0.00193215	873308	34862.5	121.183	1.31079e+07
Zensar Technologies Ltd.	2019	-0.00113965	17001.6	34862.5	121.183	1.31079e+07
Zydus Wellness Ltd.	2019	0.000339109	1271.62	34862.5	121.183	1.31079e+07
3M India Ltd.	2020	-0.000101574	435.71	46421.9	121.8	1.23926e+07
A B B India Ltd.	2020	-0.000261289	14920.4	46421.9	121.8	1.23926e+07
A C C Ltd.	2020	0.000319776	43543.9	46421.9	121.8	1.23926e+07
A I A Engineering Ltd.	2020	0.000763371	3227.96	46421.9	121.8	1.23926e+07
A P L Apollo Tubes Ltd.	2020	0.00335593	6834.71	46421.9	121.8	1.23926e+07
A U Small Finance Bank Ltd.	2020	0.000269975	158340	46421.9	121.8	1.23926e+07
Aarti Drugs Ltd.	2020	0.0062039	30214	46421.9	121.8	1.23926e+07
Aarti Industries Ltd.	2020	0.00151773	31662.9	46421.9	121.8	1.23926e+07
Abbott India Ltd.	2020	0.000716545	1085.51	46421.9	121.8	1.23926e+07
Adani Enterprises Ltd.	2020	0.00325052	368451	46421.9	121.8	1.23926e+07
Adani Ports & Special Economic Zone Ltd.	2020	0.000920419	382934	46421.9	121.8	1.23926e+07
Adani Transmission Ltd.	2020	0.000808166	60680.4	46421.9	121.8	1.23926e+07
Aditya Birla Capital Ltd.	2020	-0.000894816	264700	46421.9	121.8	1.23926e+07
Aditya Birla Fashion & Retail Ltd.	2020	-0.00142014	119907	46421.9	121.8	1.23926e+07
Advanced Enzyme Technologies Ltd.	2020	0.00270814	32783.5	46421.9	121.8	1.23926e+07
Aegis Logistics Ltd.	2020	0.000939837	27895.4	46421.9	121.8	1.23926e+07
Ajanta Pharma Ltd.	2020	0.00203122	9266.44	46421.9	121.8	1.23926e+07
Alembic Pharmaceuticals Ltd.	2020	0.00242444	25527.4	46421.9	121.8	1.23926e+07
Alkem Laboratories Ltd.	2020	0.00132232	6732.11	46421.9	121.8	1.23926e+07
Alkyl Amines Chemicals Ltd.	2020	0.00472845	4241.15	46421.9	121.8	1.23926e+07
Allcargo Logistics Ltd.	2020	0.00100789	31219.4	46421.9	121.8	1.23926e+07
Alok Industries Ltd.	2020	0.00141532	5.44298e+06	46421.9	121.8	1.23926e+07
Amara Raja Batteries Ltd.	2020	0.000955374	34325.8	46421.9	121.8	1.23926e+07
Ambuja Cements Ltd.	2020	0.000761472	207246	46421.9	121.8	1.23926e+07
Apollo Hospitals Enterprise Ltd.	2020	0.00189871	61676.5	46421.9	121.8	1.23926e+07
Apollo Tyres Ltd.	2020	0.000176599	394657	46421.9	121.8	1.23926e+07
Asahi India Glass Ltd.	2020	0.0013184	4705.57	46421.9	121.8	1.23926e+07
Ashok Leyland Ltd.	2020	0.000509449	1.93717e+06	46421.9	121.8	1.23926e+07
Asian Paints Ltd.	2020	0.00172415	100821	46421.9	121.8	1.23926e+07
Astral Ltd.	2020	0.00171573	24980.8	46421.9	121.8	1.23926e+07
Astrazeneca Pharma India Ltd.	2020	0.00223459	5261.82	46421.9	121.8	1.23926e+07
Atul Ltd.	2020	0.00178288	2800.03	46421.9	121.8	1.23926e+07
Aurobindo Pharma Ltd.	2020	0.00273682	229760	46421.9	121.8	1.23926e+07
Avanti Feeds Ltd.	2020	-0.000633453	47135.2	46421.9	121.8	1.23926e+07
Avenue Supermarts Ltd.	2020	0.00165481	90563.2	46421.9	121.8	1.23926e+07
Axis Bank Ltd.	2020	-0.000791308	920470	46421.9	121.8	1.23926e+07
B A S F India Ltd.	2020	0.00192903	6115.91	46421.9	121.8	1.23926e+07
B E M L Ltd.	2020	-8.03416e-05	52323.4	46421.9	121.8	1.23926e+07
Bajaj Auto Ltd.	2020	0.000397341	27586.3	46421.9	121.8	1.23926e+07
Bajaj Electricals Ltd.	2020	0.00214811	22438.9	46421.9	121.8	1.23926e+07
Bajaj Finance Ltd.	2020	0.000874734	296392	46421.9	121.8	1.23926e+07
Bajaj Finserv Ltd.	2020	-0.000259288	33735.9	46421.9	121.8	1.23926e+07
Bajaj Holdings & Invst. Ltd.	2020	-0.0004813	3117.46	46421.9	121.8	1.23926e+07
Balaji Amines Ltd.	2020	0.00321471	17182	46421.9	121.8	1.23926e+07
Balkrishna Industries Ltd.	2020	0.0020618	36978.3	46421.9	121.8	1.23926e+07
Balrampur Chini Mills Ltd.	2020	-0.000289961	87079.6	46421.9	121.8	1.23926e+07
Bank Of Baroda	2020	-0.00209997	2.0862e+06	46421.9	121.8	1.23926e+07
Bank Of India	2020	-0.00151406	696444	46421.9	121.8	1.23926e+07
Bank Of Maharashtra	2020	3.66867e-05	317233	46421.9	121.8	1.23926e+07
Bata India Ltd.	2020	-0.000410676	50904.5	46421.9	121.8	1.23926e+07
Bayer Cropscience Ltd.	2020	0.00158892	1649.25	46421.9	121.8	1.23926e+07
Berger Paints India Ltd.	2020	0.00156637	54394.6	46421.9	121.8	1.23926e+07
Bharat Electronics Ltd.	2020	0.000600427	739614	46421.9	121.8	1.23926e+07
Bharat Forge Ltd.	2020	0.000266095	142572	46421.9	121.8	1.23926e+07
Bharat Heavy Electricals Ltd.	2020	-0.000931646	3.317e+06	46421.9	121.8	1.23926e+07
Bharat Petroleum Corpn. Ltd.	2020	-0.000978252	372438	46421.9	121.8	1.23926e+07
Bharti Airtel Ltd.	2020	0.000447381	1.39157e+06	46421.9	121.8	1.23926e+07
Biocon Ltd.	2020	0.00179268	236676	46421.9	121.8	1.23926e+07
Birla Corporation Ltd.	2020	0.000543147	17997.1	46421.9	121.8	1.23926e+07
Birlasoft Ltd.	2020	0.00481914	150557	46421.9	121.8	1.23926e+07
Blue Dart Express Ltd.	2020	0.00245369	3846.57	46421.9	121.8	1.23926e+07
Blue Star Ltd.	2020	-4.98633e-05	12641.9	46421.9	121.8	1.23926e+07
Bombay Burmah Trdg. Corpn. Ltd.	2020	0.000810586	9391.9	46421.9	121.8	1.23926e+07
Bosch Ltd.	2020	-0.000738164	2730.9	46421.9	121.8	1.23926e+07
Brigade Enterprises Ltd.	2020	0.000495085	17276.7	46421.9	121.8	1.23926e+07
Brightcom Group Ltd.	2020	0.00087341	1.36351e+06	46421.9	121.8	1.23926e+07
Britannia Industries Ltd.	2020	0.000626072	25798.7	46421.9	121.8	1.23926e+07
C C L Products (India) Ltd.	2020	0.00118923	47535.9	46421.9	121.8	1.23926e+07
C E S C Ltd.	2020	-0.000815235	16841.6	46421.9	121.8	1.23926e+07
Cadila Healthcare Ltd.	2020	0.00246145	183348	46421.9	121.8	1.23926e+07
Can Fin Homes Ltd.	2020	0.000880131	61354.7	46421.9	121.8	1.23926e+07
Canara Bank	2020	-0.00227549	783736	46421.9	121.8	1.23926e+07
Caplin Point Laboratories Ltd.	2020	0.00214425	29425.4	46421.9	121.8	1.23926e+07
Carborundum Universal Ltd.	2020	0.000932407	34809.3	46421.9	121.8	1.23926e+07
Castrol India Ltd.	2020	-0.00022082	127249	46421.9	121.8	1.23926e+07
Ceat Ltd.	2020	0.000173022	32404.2	46421.9	121.8	1.23926e+07
Central Bank Of India	2020	-0.00108387	406422	46421.9	121.8	1.23926e+07
Century Plyboards (India) Ltd.	2020	0.00131652	32035.7	46421.9	121.8	1.23926e+07
Century Textiles & Inds. Ltd.	2020	-0.000702536	97583.7	46421.9	121.8	1.23926e+07
Cera Sanitaryware Ltd.	2020	0.000997455	1977.05	46421.9	121.8	1.23926e+07
Chambal Fertilisers & Chemicals Ltd.	2020	0.00154943	77424.9	46421.9	121.8	1.23926e+07
Cholamandalam Financial Holdings Ltd.	2020	0.000188892	12836.1	46421.9	121.8	1.23926e+07
Cholamandalam Investment & Finance Co. Ltd.	2020	0.000899327	355433	46421.9	121.8	1.23926e+07
Cipla Ltd.	2020	0.00217677	269671	46421.9	121.8	1.23926e+07
City Union Bank Ltd.	2020	-0.00100046	81338.9	46421.9	121.8	1.23926e+07
Coal India Ltd.	2020	-0.00175843	637586	46421.9	121.8	1.23926e+07
Cochin Shipyard Ltd.	2020	-0.000379913	26842.3	46421.9	121.8	1.23926e+07
Coforge Ltd.	2020	0.00213568	31803.8	46421.9	121.8	1.23926e+07
Colgate-Palmolive (India) Ltd.	2020	0.000277957	34034.7	46421.9	121.8	1.23926e+07
Container Corpn. Of India Ltd.	2020	-0.00142843	91689.8	46421.9	121.8	1.23926e+07
Coromandel International Ltd.	2020	0.00167895	86784.5	46421.9	121.8	1.23926e+07
Crisil Ltd.	2020	-1.3803e-05	4002.2	46421.9	121.8	1.23926e+07
Crompton Greaves Consumer Electricals Ltd.	2020	0.00182102	54859.7	46421.9	121.8	1.23926e+07
Cummins India Ltd.	2020	3.60942e-05	56684.8	46421.9	121.8	1.23926e+07
Cyient Ltd.	2020	0.00058335	42964.5	46421.9	121.8	1.23926e+07
D C M Shriram Ltd.	2020	-1.80262e-05	9825.62	46421.9	121.8	1.23926e+07
D L F Ltd.	2020	-1.53083e-05	748072	46421.9	121.8	1.23926e+07
Dabur India Ltd.	2020	0.000591942	121983	46421.9	121.8	1.23926e+07
Deepak Nitrite Ltd.	2020	0.00355542	92764.5	46421.9	121.8	1.23926e+07
Delta Corp Ltd.	2020	-0.000894376	216379	46421.9	121.8	1.23926e+07
Dilip Buildcon Ltd.	2020	-0.000203494	22557.7	46421.9	121.8	1.23926e+07
Divi'S Laboratories Ltd.	2020	0.00295394	41149.9	46421.9	121.8	1.23926e+07
Dixon Technologies (India) Ltd.	2020	0.00489553	4468.6	46421.9	121.8	1.23926e+07
Dr. Lal Pathlabs Ltd.	2020	0.00161945	8756.39	46421.9	121.8	1.23926e+07
Dr. Reddy'S Laboratories Ltd.	2020	0.00236981	49308.7	46421.9	121.8	1.23926e+07
E I D-Parry (India) Ltd.	2020	0.00170591	39049.4	46421.9	121.8	1.23926e+07
E I H Ltd.	2020	-0.00179775	60715.9	46421.9	121.8	1.23926e+07
E P L Ltd.	2020	0.0013521	325392	46421.9	121.8	1.23926e+07
Eclerx Services Ltd.	2020	0.00127827	9640.43	46421.9	121.8	1.23926e+07
Edelweiss Financial Services Ltd.	2020	-0.00222359	233352	46421.9	121.8	1.23926e+07
Eicher Motors Ltd.	2020	0.000625658	29746.5	46421.9	121.8	1.23926e+07
Elgi Equipments Ltd.	2020	0.000443625	24756.9	46421.9	121.8	1.23926e+07
Emami Ltd.	2020	0.00122122	56404.6	46421.9	121.8	1.23926e+07
Endurance Technologies Ltd.	2020	0.000908581	24277.9	46421.9	121.8	1.23926e+07
Engineers India Ltd.	2020	-0.000938851	194189	46421.9	121.8	1.23926e+07
Equitas Holdings Ltd.	2020	-0.00181603	612276	46421.9	121.8	1.23926e+07
Eris Lifesciences Ltd.	2020	0.000672099	18762.7	46421.9	121.8	1.23926e+07
Escorts Ltd.	2020	0.00282195	129112	46421.9	121.8	1.23926e+07
Exide Industries Ltd.	2020	4.79868e-05	170076	46421.9	121.8	1.23926e+07
F D C Ltd.	2020	0.00180317	36928.9	46421.9	121.8	1.23926e+07
Federal Bank Ltd.	2020	-0.00128474	1809986	46421.9	121.8	1.23926e+07
Finolex Cables Ltd.	2020	-0.000613198	10265.2	46421.9	121.8	1.23926e+07
Finolex Industries Ltd.	2020	0.000657755	11942	46421.9	121.8	1.23926e+07
Firstsource Solutions Ltd.	2020	0.00348624	252770	46421.9	121.8	1.23926e+07
Fortis Healthcare Ltd.	2020	0.000567565	179349	46421.9	121.8	1.23926e+07
G A I L (India) Ltd.	2020	-3.21577e-06	865377	46421.9	121.8	1.23926e+07
G M M Pfaudler Ltd.	2020	0.00280116	7105.75	46421.9	121.8	1.23926e+07
Garware Technical Fibres Ltd.	2020	0.0024743	1893.2	46421.9	121.8	1.23926e+07
General Insurance Corpn. Of India	2020	-0.00225319	40288.5	46421.9	121.8	1.23926e+07
Glaxosmithkline Pharmaceuticals Ltd.	2020	2.44479e-07	5916.79	46421.9	121.8	1.23926e+07
Glenmark Pharmaceuticals Ltd.	2020	0.00131482	256702	46421.9	121.8	1.23926e+07
Godfrey Phillips India Ltd.	2020	-0.00130964	15374.2	46421.9	121.8	1.23926e+07
Godrej Agrovet Ltd.	2020	0.000111694	31319	46421.9	121.8	1.23926e+07
Godrej Consumer Products Ltd.	2020	0.000313655	67646.2	46421.9	121.8	1.23926e+07
Godrej Industries Ltd.	2020	-6.3754e-05	49246.8	46421.9	121.8	1.23926e+07
Godrej Properties Ltd.	2020	0.00155701	35494.8	46421.9	121.8	1.23926e+07
Granules India Ltd.	2020	0.00420649	178200	46421.9	121.8	1.23926e+07
Graphite India Ltd.	2020	-8.79284e-05	104938	46421.9	121.8	1.23926e+07
Grasim Industries Ltd.	2020	0.000754136	101935	46421.9	121.8	1.23926e+07
Great Eastern Shipping Co. Ltd.	2020	-0.000524893	21473.9	46421.9	121.8	1.23926e+07
Grindwell Norton Ltd.	2020	0.000730212	8751.05	46421.9	121.8	1.23926e+07
Gujarat Alkalies & Chemicals Ltd.	2020	-0.000735805	12410.9	46421.9	121.8	1.23926e+07
Gujarat Gas Ltd.	2020	0.00154627	65817.6	46421.9	121.8	1.23926e+07
Gujarat Narmada Valley Fertilizers & Chemicals Ltd.	2020	0.00113215	104357	46421.9	121.8	1.23926e+07
Gujarat Pipavav Port Ltd.	2020	0.000331683	83098.4	46421.9	121.8	1.23926e+07
Gujarat State Fertilizers & Chemicals Ltd.	2020	-1.09545e-05	105795	46421.9	121.8	1.23926e+07
Gujarat State Petronet Ltd.	2020	-0.000193569	42123.6	46421.9	121.8	1.23926e+07
H C L Technologies Ltd.	2020	0.00198619	269733	46421.9	121.8	1.23926e+07
H D F C Bank Ltd.	2020	0.000437864	702382	46421.9	121.8	1.23926e+07
H D F C Life Insurance Co. Ltd.	2020	0.00025724	842105	46421.9	121.8	1.23926e+07
H E G Ltd.	2020	-0.000598598	34871.2	46421.9	121.8	1.23926e+07
H F C L Ltd.	2020	0.00144299	707121	46421.9	121.8	1.23926e+07
Hathway Cable & Datacom Ltd.	2020	0.0020611	188210	46421.9	121.8	1.23926e+07
Hatsun Agro Products Ltd.	2020	0.00199715	3945	46421.9	121.8	1.23926e+07
Havells India Ltd.	2020	0.00133486	99798.4	46421.9	121.8	1.23926e+07
Hero Motocorp Ltd.	2020	0.000979489	49027.7	46421.9	121.8	1.23926e+07
Hikal Ltd.	2020	0.000950757	75893.4	46421.9	121.8	1.23926e+07
Hindalco Industries Ltd.	2020	0.000349936	638911	46421.9	121.8	1.23926e+07
Hindustan Copper Ltd.	2020	0.0009238	194337	46421.9	121.8	1.23926e+07
Hindustan Petroleum Corpn. Ltd.	2020	-0.00084559	397746	46421.9	121.8	1.23926e+07
Hindustan Unilever Ltd.	2020	0.000837475	171836	46421.9	121.8	1.23926e+07
Hindustan Zinc Ltd.	2020	0.000434001	96105.1	46421.9	121.8	1.23926e+07
Honeywell Automation India Ltd.	2020	0.00125491	419.405	46421.9	121.8	1.23926e+07
Housing & Urban Devp. Corpn. Ltd.	2020	9.09958e-05	181285	46421.9	121.8	1.23926e+07
Housing Development Finance Corpn. Ltd.	2020	0.000145959	277267	46421.9	121.8	1.23926e+07
I C I C I Bank Ltd.	2020	-4.35387e-05	1.60865e+06	46421.9	121.8	1.23926e+07
I C I C I Lombard General Insurance Co. Ltd.	2020	0.000443329	44810.6	46421.9	121.8	1.23926e+07
I C I C I Prudential Life Insurance Co. Ltd.	2020	9.3868e-05	144100	46421.9	121.8	1.23926e+07
I D B I Bank Ltd.	2020	-0.000742592	632581	46421.9	121.8	1.23926e+07
I D F C First Bank Ltd.	2020	-0.000871542	2.13781e+06	46421.9	121.8	1.23926e+07
I D F C Ltd.	2020	-0.000116255	586703	46421.9	121.8	1.23926e+07
I F B Industries Ltd.	2020	0.00217044	7321.75	46421.9	121.8	1.23926e+07
I I F L Finance Ltd.	2020	-0.000909489	64442.5	46421.9	121.8	1.23926e+07
I R B Infrastructure Developers Ltd.	2020	0.00186046	162453	46421.9	121.8	1.23926e+07
I T C Ltd.	2020	-0.00054552	1.30297e+06	46421.9	121.8	1.23926e+07
I T I Ltd.	2020	0.0011083	164077	46421.9	121.8	1.23926e+07
India Cements Ltd.	2020	0.00311779	391788	46421.9	121.8	1.23926e+07
Indiabulls Housing Finance Ltd.	2020	-0.00154422	1.9372e+06	46421.9	121.8	1.23926e+07
Indiabulls Real Estate Ltd.	2020	0.000167524	352599	46421.9	121.8	1.23926e+07
Indian Bank	2020	-0.000730836	179736	46421.9	121.8	1.23926e+07
Indian Energy Exchange Ltd.	2020	0.00166029	174954	46421.9	121.8	1.23926e+07
Indian Hotels Co. Ltd.	2020	-0.000788683	222809	46421.9	121.8	1.23926e+07
Indian Oil Corpn. Ltd.	2020	-0.00132491	1.18166e+06	46421.9	121.8	1.23926e+07
Indian Overseas Bank	2020	-0.000163176	391105	46421.9	121.8	1.23926e+07
Indoco Remedies Ltd.	2020	0.00197955	14405.8	46421.9	121.8	1.23926e+07
Indraprastha Gas Ltd.	2020	0.000693497	133007	46421.9	121.8	1.23926e+07
Indus Towers Ltd.	2020	-0.000393495	838330	46421.9	121.8	1.23926e+07
Indusind Bank Ltd.	2020	-0.00212527	1.11575e+06	46421.9	121.8	1.23926e+07
Infibeam Avenues Ltd.	2020	0.00177376	159116	46421.9	121.8	1.23926e+07
Info Edge (India) Ltd.	2020	0.00251081	31558.4	46421.9	121.8	1.23926e+07
Infosys Ltd.	2020	0.0021274	498103	46421.9	121.8	1.23926e+07
Inox Leisure Ltd.	2020	-0.00116452	90766.9	46421.9	121.8	1.23926e+07
Intellect Design Arena Ltd.	2020	0.00306328	32938.3	46421.9	121.8	1.23926e+07
Interglobe Aviation Ltd.	2020	0.00101904	129084	46421.9	121.8	1.23926e+07
Ipca Laboratories Ltd.	2020	0.00258886	21641.8	46421.9	121.8	1.23926e+07
J B Chemicals & Pharmaceuticals Ltd.	2020	0.00339035	13889.7	46421.9	121.8	1.23926e+07
J K Cement Ltd.	2020	0.0018009	9172.81	46421.9	121.8	1.23926e+07
J K Lakshmi Cement Ltd.	2020	0.000451466	22654.6	46421.9	121.8	1.23926e+07
J K Paper Ltd.	2020	-0.000786123	88804.2	46421.9	121.8	1.23926e+07
J M Financial Ltd.	2020	-0.00044434	122888	46421.9	121.8	1.23926e+07
J S W Energy Ltd.	2020	-9.82005e-05	233342	46421.9	121.8	1.23926e+07
J S W Steel Ltd.	2020	0.00133726	572447	46421.9	121.8	1.23926e+07
Jamna Auto Inds. Ltd.	2020	0.00104792	159765	46421.9	121.8	1.23926e+07
Jindal Stainless (Hisar) Ltd.	2020	0.00224387	64288.3	46421.9	121.8	1.23926e+07
Jindal Stainless Ltd.	2020	0.00258388	117318	46421.9	121.8	1.23926e+07
Jindal Steel & Power Ltd.	2020	0.00169874	1.00412e+06	46421.9	121.8	1.23926e+07
Jubilant Foodworks Ltd.	2020	0.0020093	38173.8	46421.9	121.8	1.23926e+07
Jubilant Pharmova Ltd.	2020	0.00181593	51748.5	46421.9	121.8	1.23926e+07
Just Dial Ltd.	2020	0.00048152	167266	46421.9	121.8	1.23926e+07
Jyothy Labs Ltd.	2020	-0.00013331	45336.8	46421.9	121.8	1.23926e+07
K E C International Ltd.	2020	0.000635097	30773.4	46421.9	121.8	1.23926e+07
K N R Constructions Ltd.	2020	0.000822782	15402.2	46421.9	121.8	1.23926e+07
K P R Mill Ltd.	2020	0.00121335	3929.94	46421.9	121.8	1.23926e+07
K R B L Ltd.	2020	-0.000689059	31224.4	46421.9	121.8	1.23926e+07
Kajaria Ceramics Ltd.	2020	0.00110713	38277.4	46421.9	121.8	1.23926e+07
Kalpataru Power Transmission Ltd.	2020	-0.00104456	36715.3	46421.9	121.8	1.23926e+07
Kansai Nerolac Paints Ltd.	2020	0.000575189	16534.6	46421.9	121.8	1.23926e+07
Kei Industries Ltd.	2020	2.71156e-05	16559	46421.9	121.8	1.23926e+07
Kotak Mahindra Bank Ltd.	2020	0.000702988	512136	46421.9	121.8	1.23926e+07
L & T Finance Holdings Ltd.	2020	-0.00101501	1.29184e+06	46421.9	121.8	1.23926e+07
L & T Technology Services Ltd.	2020	0.00173767	8465.53	46421.9	121.8	1.23926e+07
L I C Housing Finance Ltd.	2020	-0.000926585	275935	46421.9	121.8	1.23926e+07
Lakshmi Machine Works Ltd.	2020	0.00129349	2849.57	46421.9	121.8	1.23926e+07
Larsen & Toubro Infotech Ltd.	2020	0.00276716	17249.9	46421.9	121.8	1.23926e+07
Larsen & Toubro Ltd.	2020	-0.000173225	272366	46421.9	121.8	1.23926e+07
Laurus Labs Ltd.	2020	0.00617072	295266	46421.9	121.8	1.23926e+07
Linde India Ltd.	2020	0.00146438	10346.3	46421.9	121.8	1.23926e+07
Lupin Ltd.	2020	0.000918179	126123	46421.9	121.8	1.23926e+07
Lux Industries Ltd.	2020	0.000852857	2891.92	46421.9	121.8	1.23926e+07
M M T C Ltd.	2020	0.00106223	174822	46421.9	121.8	1.23926e+07
M O I L Ltd.	2020	-0.000301599	30624.6	46421.9	121.8	1.23926e+07
M R F Ltd.	2020	0.000466701	787.877	46421.9	121.8	1.23926e+07
Mahanagar Gas Ltd.	2020	-1.43734e-05	54147	46421.9	121.8	1.23926e+07
Mahindra & Mahindra Financial Services Ltd.	2020	-0.000670171	746516	46421.9	121.8	1.23926e+07
Mahindra & Mahindra Ltd.	2020	0.00114564	227387	46421.9	121.8	1.23926e+07
Mahindra C I E Automotive Ltd.	2020	5.93417e-05	16302.3	46421.9	121.8	1.23926e+07
Mahindra Holidays & Resorts India Ltd.	2020	-0.000314353	9810.32	46421.9	121.8	1.23926e+07
Mahindra Logistics Ltd.	2020	-4.33693e-05	6738.8	46421.9	121.8	1.23926e+07
Manappuram Finance Ltd.	2020	-0.000302962	619361	46421.9	121.8	1.23926e+07
Mangalore Refinery & Petrochemicals Ltd.	2020	-0.000843855	131237	46421.9	121.8	1.23926e+07
Marico Ltd.	2020	0.000702647	129447	46421.9	121.8	1.23926e+07
Maruti Suzuki India Ltd.	2020	0.000168434	48989.3	46421.9	121.8	1.23926e+07
Mastek Ltd.	2020	0.00391066	14563	46421.9	121.8	1.23926e+07
Max Financial Services Ltd.	2020	0.000779584	156544	46421.9	121.8	1.23926e+07
Minda Industries Ltd.	2020	0.000404351	15240.7	46421.9	121.8	1.23926e+07
Mindtree Ltd.	2020	0.00282563	58875.5	46421.9	121.8	1.23926e+07
Motilal Oswal Financial Services Ltd.	2020	-0.00127333	7678.66	46421.9	121.8	1.23926e+07
Mphasis Ltd.	2020	0.00216009	24978	46421.9	121.8	1.23926e+07
Multi Commodity Exchange Of India Ltd.	2020	0.00148548	36632.8	46421.9	121.8	1.23926e+07
Muthoot Finance Ltd.	2020	0.00180567	108163	46421.9	121.8	1.23926e+07
N B C C (India) Ltd.	2020	-0.000995764	830765	46421.9	121.8	1.23926e+07
N C C Ltd.	2020	-5.46883e-05	1.34816e+06	46421.9	121.8	1.23926e+07
N H P C Ltd.	2020	-0.000220515	452967	46421.9	121.8	1.23926e+07
N L C India Ltd.	2020	-0.000199945	72191.9	46421.9	121.8	1.23926e+07
N M D C Ltd.	2020	-0.000543737	408556	46421.9	121.8	1.23926e+07
N T P C Ltd.	2020	-0.000795767	929676	46421.9	121.8	1.23926e+07
Narayana Hrudayalaya Ltd.	2020	0.00121768	51927.4	46421.9	121.8	1.23926e+07
Natco Pharma Ltd.	2020	0.00173814	22351.8	46421.9	121.8	1.23926e+07
National Aluminium Co. Ltd.	2020	-0.000254091	824299	46421.9	121.8	1.23926e+07
Navin Fluorine Intl. Ltd.	2020	0.0037883	14688.8	46421.9	121.8	1.23926e+07
Nesco Ltd.	2020	-0.000788379	8926.92	46421.9	121.8	1.23926e+07
Nestle India Ltd.	2020	0.00088256	5506.64	46421.9	121.8	1.23926e+07
Network18 Media & Invst. Ltd.	2020	0.00137297	224380	46421.9	121.8	1.23926e+07
New India Assurance Co. Ltd.	2020	-0.000474407	40361.3	46421.9	121.8	1.23926e+07
Nippon Life India Asset Mgmt. Ltd.	2020	-0.000676054	106287	46421.9	121.8	1.23926e+07
Nocil Ltd.	2020	0.00105817	196785	46421.9	121.8	1.23926e+07
Oberoi Realty Ltd.	2020	0.000389086	49520.6	46421.9	121.8	1.23926e+07
Oil & Natural Gas Corpn. Ltd.	2020	-0.00125906	1.45767e+06	46421.9	121.8	1.23926e+07
Oil India Ltd.	2020	-0.00140557	137306	46421.9	121.8	1.23926e+07
Oracle Financial Services Software Ltd.	2020	0.000656399	3298.86	46421.9	121.8	1.23926e+07
P C B L Ltd.	2020	0.00122766	131594	46421.9	121.8	1.23926e+07
P I Industries Ltd.	2020	0.00167739	16731.9	46421.9	121.8	1.23926e+07
P N B Housing Finance Ltd.	2020	-0.00119863	65640.1	46421.9	121.8	1.23926e+07
P N C Infratech Ltd.	2020	-0.000479985	17216.8	46421.9	121.8	1.23926e+07
P V R Ltd.	2020	-0.00132992	103736	46421.9	121.8	1.23926e+07
Page Industries Ltd.	2020	0.000624754	2357.03	46421.9	121.8	1.23926e+07
Persistent Systems Ltd.	2020	0.00298271	10287	46421.9	121.8	1.23926e+07
Petronet L N G Ltd.	2020	-0.00032748	148580	46421.9	121.8	1.23926e+07
Pfizer Ltd.	2020	0.000744734	6440.5	46421.9	121.8	1.23926e+07
Phoenix Mills Ltd.	2020	-0.000312646	112749	46421.9	121.8	1.23926e+07
Pidilite Industries Ltd.	2020	0.000924897	72929.5	46421.9	121.8	1.23926e+07
Piramal Enterprises Ltd.	2020	-0.000255177	90332.1	46421.9	121.8	1.23926e+07
Poly Medicure Ltd.	2020	0.00343625	17230.3	46421.9	121.8	1.23926e+07
Poonawalla Fincorp Ltd.	2020	-0.00127451	175043	46421.9	121.8	1.23926e+07
Power Finance Corpn. Ltd.	2020	-0.000188233	479759	46421.9	121.8	1.23926e+07
Power Grid Corpn. Of India Ltd.	2020	-0.000111325	544533	46421.9	121.8	1.23926e+07
Praj Industries Ltd.	2020	0.000113312	150081	46421.9	121.8	1.23926e+07
Prestige Estates Projects Ltd.	2020	-0.000854338	47872.3	46421.9	121.8	1.23926e+07
Prism Johnson Ltd.	2020	0.00108078	85193.3	46421.9	121.8	1.23926e+07
Procter & Gamble Health Ltd.	2020	0.00173958	1504.98	46421.9	121.8	1.23926e+07
Procter & Gamble Hygiene & Health Care Ltd.	2020	-8.76619e-05	699.734	46421.9	121.8	1.23926e+07
Punjab National Bank	2020	-0.00278644	2.32563e+06	46421.9	121.8	1.23926e+07
Quess Corp Ltd.	2020	0.000319416	30962.1	46421.9	121.8	1.23926e+07
R B L Bank Ltd.	2020	-0.00186338	1.35617e+06	46421.9	121.8	1.23926e+07
R E C Ltd.	2020	-0.0003272	470774	46421.9	121.8	1.23926e+07
R H I Magnesita India Ltd.	2020	0.000166457	14415.7	46421.9	121.8	1.23926e+07
Radico Khaitan Ltd.	2020	0.00134738	45593.2	46421.9	121.8	1.23926e+07
Rain Industries Ltd.	2020	0.000724126	158466	46421.9	121.8	1.23926e+07
Rajesh Exports Ltd.	2020	-0.00134098	25072.1	46421.9	121.8	1.23926e+07
Rallis India Ltd.	2020	0.00179662	51680.9	46421.9	121.8	1.23926e+07
Ramco Cements Ltd.	2020	0.000135879	22611.3	46421.9	121.8	1.23926e+07
Rashtriya Chemicals & Fertilizers Ltd.	2020	0.000336199	217878	46421.9	121.8	1.23926e+07
Ratnamani Metals & Tubes Ltd.	2020	0.00143817	3173.98	46421.9	121.8	1.23926e+07
Redington (India) Ltd.	2020	0.000490121	48510.4	46421.9	121.8	1.23926e+07
Relaxo Footwears Ltd.	2020	0.00105004	16266.5	46421.9	121.8	1.23926e+07
Reliance Industries Ltd.	2020	0.00105616	1.65481e+06	46421.9	121.8	1.23926e+07
S B I Life Insurance Co. Ltd.	2020	-0.000277919	51517.6	46421.9	121.8	1.23926e+07
S I S Ltd.	2020	-0.000494666	15847.3	46421.9	121.8	1.23926e+07
S J V N Ltd.	2020	-0.000133465	128651	46421.9	121.8	1.23926e+07
S K F India Ltd.	2020	-0.00103922	2523.86	46421.9	121.8	1.23926e+07
S R F Ltd.	2020	0.001885	11451.9	46421.9	121.8	1.23926e+07
Sanofi India Ltd.	2020	0.000696137	2779.15	46421.9	121.8	1.23926e+07
Saregama India Ltd.	2020	0.00271362	2758.07	46421.9	121.8	1.23926e+07
Schaeffler India Ltd.	2020	-7.03262e-05	660.194	46421.9	121.8	1.23926e+07
Sequent Scientific Ltd.	2020	0.00336971	586405	46421.9	121.8	1.23926e+07
Sheela Foam Ltd.	2020	0.00093566	6469.54	46421.9	121.8	1.23926e+07
Shilpa Medicare Ltd.	2020	0.00178284	46028.8	46421.9	121.8	1.23926e+07
Shipping Corpn. Of India Ltd.	2020	0.00137543	222820	46421.9	121.8	1.23926e+07
Shree Cement Ltd.	2020	0.000491254	1734.67	46421.9	121.8	1.23926e+07
Shriram City Union Finance Ltd.	2020	-0.000856775	2426	46421.9	121.8	1.23926e+07
Shriram Transport Finance Co. Ltd.	2020	-0.000304804	208707	46421.9	121.8	1.23926e+07
Siemens Ltd.	2020	0.000160802	1.04583e+06	46421.9	121.8	1.23926e+07
Sobha Ltd.	2020	5.83826e-05	49242	46421.9	121.8	1.23926e+07
Solar Industries India Ltd.	2020	-8.19745e-05	4357.38	46421.9	121.8	1.23926e+07
Sonata Software Ltd.	2020	0.000905543	33110.9	46421.9	121.8	1.23926e+07
State Bank Of India	2020	-0.000837393	3.13024e+06	46421.9	121.8	1.23926e+07
Steel Authority Of India Ltd.	2020	0.00178557	2.11471e+06	46421.9	121.8	1.23926e+07
Sterlite Technologies Ltd.	2020	0.00145668	169385	46421.9	121.8	1.23926e+07
Strides Pharma Science Ltd.	2020	0.00336252	149915	46421.9	121.8	1.23926e+07
Sudarshan Chemical Inds. Ltd.	2020	0.000576404	28296.5	46421.9	121.8	1.23926e+07
Sun Pharma Advanced Research Co. Ltd.	2020	0.000752666	115863	46421.9	121.8	1.23926e+07
Sun Pharmaceutical Inds. Ltd.	2020	0.00122201	394044	46421.9	121.8	1.23926e+07
Sun T V Network Ltd.	2020	0.000408484	132054	46421.9	121.8	1.23926e+07
Sundram Fasteners Ltd.	2020	0.000142071	7856.53	46421.9	121.8	1.23926e+07
Sunteck Realty Ltd.	2020	-0.000853986	71594.7	46421.9	121.8	1.23926e+07
Supreme Industries Ltd.	2020	0.00140344	13447.6	46421.9	121.8	1.23926e+07
Supreme Petrochem Ltd.	2020	0.00312349	5977.77	46421.9	121.8	1.23926e+07
Suzlon Energy Ltd.	2020	0.00417029	6.40961e+06	46421.9	121.8	1.23926e+07
Symphony Ltd.	2020	-0.000390466	5395.77	46421.9	121.8	1.23926e+07
Syngene International Ltd.	2020	0.00256454	29114.2	46421.9	121.8	1.23926e+07
T C I Express Ltd.	2020	0.000939092	3105.79	46421.9	121.8	1.23926e+07
T T K Prestige Ltd.	2020	0.00026429	1178.67	46421.9	121.8	1.23926e+07
T V S Motor Co. Ltd.	2020	0.00022444	102848	46421.9	121.8	1.23926e+07
Tanla Platforms Ltd.	2020	0.00905062	131261	46421.9	121.8	1.23926e+07
Tata Chemicals Ltd.	2020	-0.00136037	153042	46421.9	121.8	1.23926e+07
Tata Coffee Ltd.	2020	0.000491629	77790.9	46421.9	121.8	1.23926e+07
Tata Communications Ltd.	2020	0.00396719	19739.1	46421.9	121.8	1.23926e+07
Tata Consultancy Services Ltd.	2020	0.00113276	166718	46421.9	121.8	1.23926e+07
Tata Consumer Products Ltd.	2020	0.00238226	228937	46421.9	121.8	1.23926e+07
Tata Elxsi Ltd.	2020	0.00315371	61926.9	46421.9	121.8	1.23926e+07
Tata Investment Corpn. Ltd.	2020	0.000835131	3303.48	46421.9	121.8	1.23926e+07
Tata Motors Ltd.	2020	-0.000213415	3.59597e+06	46421.9	121.8	1.23926e+07
Tata Power Co. Ltd.	2020	0.00105426	1.50991e+06	46421.9	121.8	1.23926e+07
Tata Steel Ltd.	2020	0.00112283	750567	46421.9	121.8	1.23926e+07
Tata Teleservices (Maharashtra) Ltd.	2020	0.00479597	938037	46421.9	121.8	1.23926e+07
Teamlease Services Ltd.	2020	0.000174729	4261.9	46421.9	121.8	1.23926e+07
Tech Mahindra Ltd.	2020	0.000949418	165365	46421.9	121.8	1.23926e+07
Thermax Ltd.	2020	-0.000753452	16288.6	46421.9	121.8	1.23926e+07
Thyrocare Technologies Ltd.	2020	0.00209493	16521.9	46421.9	121.8	1.23926e+07
Timken India Ltd.	2020	0.00149336	5007.06	46421.9	121.8	1.23926e+07
Titan Company Ltd.	2020	0.00121029	118745	46421.9	121.8	1.23926e+07
Torrent Pharmaceuticals Ltd.	2020	0.00161501	19387.8	46421.9	121.8	1.23926e+07
Torrent Power Ltd.	2020	0.000383657	58896.6	46421.9	121.8	1.23926e+07
Trent Ltd.	2020	0.000953271	29829.5	46421.9	121.8	1.23926e+07
Trident Ltd.	2020	0.00151179	1.73903e+06	46421.9	121.8	1.23926e+07
Triveni Turbine Ltd.	2020	-0.000713892	22685.5	46421.9	121.8	1.23926e+07
Tube Investments Of India Ltd.	2020	0.00192434	23322	46421.9	121.8	1.23926e+07
Tv18 Broadcast Ltd.	2020	0.00130074	526797	46421.9	121.8	1.23926e+07
U P L Ltd.	2020	-0.000969915	286955	46421.9	121.8	1.23926e+07
Uco Bank	2020	-0.00111648	292358	46421.9	121.8	1.23926e+07
Uflex Ltd.	2020	0.00221293	15161.6	46421.9	121.8	1.23926e+07
Ultratech Cement Ltd.	2020	0.000871314	24210.5	46421.9	121.8	1.23926e+07
Union Bank Of India	2020	-0.0022126	572922	46421.9	121.8	1.23926e+07
United Breweries Ltd.	2020	-0.000308158	29837.3	46421.9	121.8	1.23926e+07
V I P Industries Ltd.	2020	-0.000654617	43341	46421.9	121.8	1.23926e+07
V-Guard Industries Ltd.	2020	-0.000570558	44222.9	46421.9	121.8	1.23926e+07
V-Mart Retail Ltd.	2020	0.00168753	9666.21	46421.9	121.8	1.23926e+07
Vaibhav Global Ltd.	2020	0.00419775	1479.04	46421.9	121.8	1.23926e+07
Vakrangee Ltd.	2020	0.00128783	1479.04	46421.9	121.8	1.23926e+07
Vardhman Textiles Ltd.	2020	0.00039435	1479.04	46421.9	121.8	1.23926e+07
Varun Beverages Ltd.	2020	0.00102393	1479.04	46421.9	121.8	1.23926e+07
Vedanta Ltd.	2020	-0.000192783	1479.04	46421.9	121.8	1.23926e+07
Venky'S (India) Ltd.	2020	-9.87653e-05	1479.04	46421.9	121.8	1.23926e+07
Vinati Organics Ltd.	2020	0.000825703	9666.21	46421.9	121.8	1.23926e+07
Vodafone Idea Ltd.	2020	0.00220117	7.4622e+07	46421.9	121.8	1.23926e+07
Voltas Ltd.	2020	0.000894809	65553.8	46421.9	121.8	1.23926e+07
Wabco India Ltd.	2020	-0.000674609	599.698	46421.9	121.8	1.23926e+07
Welspun Corp Ltd.	2020	-0.000375232	183160	46421.9	121.8	1.23926e+07
Welspun India Ltd.	2020	0.00126115	279143	46421.9	121.8	1.23926e+07
Whirlpool Of India Ltd.	2020	0.000470236	5064.97	46421.9	121.8	1.23926e+07
Wipro Ltd.	2020	0.00175416	475241	46421.9	121.8	1.23926e+07
Wockhardt Ltd.	2020	0.00330246	125568	46421.9	121.8	1.23926e+07
Yes Bank Ltd.	2020	-0.00386487	1.92679e+07	46421.9	121.8	1.23926e+07
Zee Entertainment Enterprises Ltd.	2020	-0.00103354	1.03624e+06	46421.9	121.8	1.23926e+07
Zensar Technologies Ltd.	2020	0.00108046	29961.3	46421.9	121.8	1.23926e+07
Zydus Wellness Ltd.	2020	0.00118315	3092.49	46421.9	121.8	1.23926e+07
3M India Ltd.	2021	0.00072769	350.472	47450.3	134.95	1.34767e+07
A B B India Ltd.	2021	0.00230035	14444.5	47450.3	134.95	1.34767e+07
A C C Ltd.	2021	0.00121789	31559.8	47450.3	134.95	1.34767e+07
A I A Engineering Ltd.	2021	-0.000327303	6327.35	47450.3	134.95	1.34767e+07
A P L Apollo Tubes Ltd.	2021	0.00326293	63226.9	47450.3	134.95	1.34767e+07
A U Small Finance Bank Ltd.	2021	0.000642316	79589.3	47450.3	134.95	1.34767e+07
Aarti Drugs Ltd.	2021	-0.00123761	45685.5	47450.3	134.95	1.34767e+07
Aarti Industries Ltd.	2021	0.00181805	59612.3	47450.3	134.95	1.34767e+07
Abbott India Ltd.	2021	0.000874461	1531.14	47450.3	134.95	1.34767e+07
Adani Enterprises Ltd.	2021	0.00499941	407608	47450.3	134.95	1.34767e+07
Adani Ports & Special Economic Zone Ltd.	2021	0.00153717	633869	47450.3	134.95	1.34767e+07
Adani Transmission Ltd.	2021	0.00551714	52674.5	47450.3	134.95	1.34767e+07
Aditya Birla Capital Ltd.	2021	0.0013182	396422	47450.3	134.95	1.34767e+07
Aditya Birla Fashion & Retail Ltd.	2021	0.00198061	232987	47450.3	134.95	1.34767e+07
Advanced Enzyme Technologies Ltd.	2021	-6.25169e-05	48736.8	47450.3	134.95	1.34767e+07
Aegis Logistics Ltd.	2021	-0.000569559	75373.3	47450.3	134.95	1.34767e+07
Ajanta Pharma Ltd.	2021	0.00122786	6371.27	47450.3	134.95	1.34767e+07
Alembic Pharmaceuticals Ltd.	2021	-0.00113089	28222.4	47450.3	134.95	1.34767e+07
Alkem Laboratories Ltd.	2021	0.000804509	8986.91	47450.3	134.95	1.34767e+07
Alkyl Amines Chemicals Ltd.	2021	0.00277967	10780.9	47450.3	134.95	1.34767e+07
Allcargo Logistics Ltd.	2021	0.00429515	116648	47450.3	134.95	1.34767e+07
Alok Industries Ltd.	2021	0.00046418	2.11079e+06	47450.3	134.95	1.34767e+07
Amara Raja Batteries Ltd.	2021	-0.00167787	104113	47450.3	134.95	1.34767e+07
Ambuja Cements Ltd.	2021	0.00161815	274709	47450.3	134.95	1.34767e+07
Apollo Hospitals Enterprise Ltd.	2021	0.00295327	49995.7	47450.3	134.95	1.34767e+07
Apollo Tyres Ltd.	2021	0.000604435	409091	47450.3	134.95	1.34767e+07
Asahi India Glass Ltd.	2021	0.00211026	16057.6	47450.3	134.95	1.34767e+07
Ashok Leyland Ltd.	2021	0.000651057	1.57992e+06	47450.3	134.95	1.34767e+07
Asian Paints Ltd.	2021	0.000827047	107422	47450.3	134.95	1.34767e+07
Astral Ltd.	2021	0.00213412	25348.7	47450.3	134.95	1.34767e+07
Astrazeneca Pharma India Ltd.	2021	-0.00164081	5540.41	47450.3	134.95	1.34767e+07
Atul Ltd.	2021	0.00135025	3856.64	47450.3	134.95	1.34767e+07
Aurobindo Pharma Ltd.	2021	-0.00111115	151065	47450.3	134.95	1.34767e+07
Avanti Feeds Ltd.	2021	0.000315828	40063.3	47450.3	134.95	1.34767e+07
Avenue Supermarts Ltd.	2021	0.00191694	41670.6	47450.3	134.95	1.34767e+07
Axis Bank Ltd.	2021	0.000332446	593674	47450.3	134.95	1.34767e+07
B A S F India Ltd.	2021	0.00251773	5456.26	47450.3	134.95	1.34767e+07
B E M L Ltd.	2021	0.00197247	39197.8	47450.3	134.95	1.34767e+07
Bajaj Auto Ltd.	2021	-0.00032281	29100.3	47450.3	134.95	1.34767e+07
Bajaj Electricals Ltd.	2021	0.00299391	24888.9	47450.3	134.95	1.34767e+07
Bajaj Finance Ltd.	2021	0.00117265	95418	47450.3	134.95	1.34767e+07
Bajaj Finserv Ltd.	2021	0.00246114	21145.3	47450.3	134.95	1.34767e+07
Bajaj Holdings & Invst. Ltd.	2021	0.00220637	3088.68	47450.3	134.95	1.34767e+07
Balaji Amines Ltd.	2021	0.00496495	17923.7	47450.3	134.95	1.34767e+07
Balkrishna Industries Ltd.	2021	0.00132416	34034.8	47450.3	134.95	1.34767e+07
Balrampur Chini Mills Ltd.	2021	0.00308879	141378	47450.3	134.95	1.34767e+07
Bank Of Baroda	2021	0.000885038	3.36228e+06	47450.3	134.95	1.34767e+07
Bank Of India	2021	7.92997e-05	808403	47450.3	134.95	1.34767e+07
Bank Of Maharashtra	2021	0.00136684	1.38056e+06	47450.3	134.95	1.34767e+07
Bata India Ltd.	2021	0.000651093	42186.6	47450.3	134.95	1.34767e+07
Bayer Cropscience Ltd.	2021	-0.000485782	2563.3	47450.3	134.95	1.34767e+07
Berger Paints India Ltd.	2021	-3.46052e-05	58054.5	47450.3	134.95	1.34767e+07
Bharat Electronics Ltd.	2021	0.00188558	777788	47450.3	134.95	1.34767e+07
Bharat Forge Ltd.	2021	0.000940566	115594	47450.3	134.95	1.34767e+07
Bharat Heavy Electricals Ltd.	2021	0.00149875	5.71969e+06	47450.3	134.95	1.34767e+07
Bharat Petroleum Corpn. Ltd.	2021	-0.000101225	505957	47450.3	134.95	1.34767e+07
Bharti Airtel Ltd.	2021	0.00120156	690086	47450.3	134.95	1.34767e+07
Biocon Ltd.	2021	-0.00100371	219188	47450.3	134.95	1.34767e+07
Birla Corporation Ltd.	2021	0.00264885	16269.6	47450.3	134.95	1.34767e+07
Birlasoft Ltd.	2021	0.00307748	183441	47450.3	134.95	1.34767e+07
Blue Dart Express Ltd.	2021	0.00179898	2217.77	47450.3	134.95	1.34767e+07
Blue Star Ltd.	2021	0.000923914	8919.6	47450.3	134.95	1.34767e+07
Bombay Burmah Trdg. Corpn. Ltd.	2021	-0.000636465	10690.5	47450.3	134.95	1.34767e+07
Bosch Ltd.	2021	0.00105195	83668.1	47450.3	134.95	1.34767e+07
Brigade Enterprises Ltd.	2021	0.00267223	33055.8	47450.3	134.95	1.34767e+07
Brightcom Group Ltd.	2021	0.0127755	1.65672e+06	47450.3	134.95	1.34767e+07
Britannia Industries Ltd.	2021	5.91259e-05	28089	47450.3	134.95	1.34767e+07
C C L Products (India) Ltd.	2021	0.00188027	41312.6	47450.3	134.95	1.34767e+07
C E S C Ltd.	2021	0.00135739	132416	47450.3	134.95	1.34767e+07
Cadila Healthcare Ltd.	2021	-2.32911e-05	271089	47450.3	134.95	1.34767e+07
Can Fin Homes Ltd.	2021	0.000469518	54013.5	47450.3	134.95	1.34767e+07
Canara Bank	2021	0.00161281	1.17502e+06	47450.3	134.95	1.34767e+07
Caplin Point Laboratories Ltd.	2021	0.00211992	28491	47450.3	134.95	1.34767e+07
Carborundum Universal Ltd.	2021	0.00358603	24348.5	47450.3	134.95	1.34767e+07
Castrol India Ltd.	2021	-9.83478e-06	114979	47450.3	134.95	1.34767e+07
Ceat Ltd.	2021	0.000278387	16361.1	47450.3	134.95	1.34767e+07
Central Bank Of India	2021	0.00164539	1.97121e+06	47450.3	134.95	1.34767e+07
Century Plyboards (India) Ltd.	2021	0.00366409	26772	47450.3	134.95	1.34767e+07
Century Textiles & Inds. Ltd.	2021	0.00317496	65735.5	47450.3	134.95	1.34767e+07
Cera Sanitaryware Ltd.	2021	0.00127476	2789.91	47450.3	134.95	1.34767e+07
Chambal Fertilisers & Chemicals Ltd.	2021	0.0021309	143075	47450.3	134.95	1.34767e+07
Cholamandalam Financial Holdings Ltd.	2021	0.00044335	5561.11	47450.3	134.95	1.34767e+07
Cholamandalam Investment & Finance Co. Ltd.	2021	0.000647031	185414	47450.3	134.95	1.34767e+07
Cipla Ltd.	2021	0.000509319	233705	47450.3	134.95	1.34767e+07
City Union Bank Ltd.	2021	-0.00112638	151347	47450.3	134.95	1.34767e+07
Coal India Ltd.	2021	0.000250584	984475	47450.3	134.95	1.34767e+07
Cochin Shipyard Ltd.	2021	-0.000279367	25623.6	47450.3	134.95	1.34767e+07
Coforge Ltd.	2021	0.00294303	47970.3	47450.3	134.95	1.34767e+07
Colgate-Palmolive (India) Ltd.	2021	-0.000253539	30701.5	47450.3	134.95	1.34767e+07
Container Corpn. Of India Ltd.	2021	0.00160194	134118	47450.3	134.95	1.34767e+07
Coromandel International Ltd.	2021	-0.000337422	41185.1	47450.3	134.95	1.34767e+07
Crisil Ltd.	2021	0.00158184	5297.47	47450.3	134.95	1.34767e+07
Crompton Greaves Consumer Electricals Ltd.	2021	0.000632586	395760	47450.3	134.95	1.34767e+07
Cummins India Ltd.	2021	0.00176141	78218.3	47450.3	134.95	1.34767e+07
Cyient Ltd.	2021	0.00268936	37589.2	47450.3	134.95	1.34767e+07
D C M Shriram Ltd.	2021	0.00356498	22038.8	47450.3	134.95	1.34767e+07
D L F Ltd.	2021	0.00189022	698542	47450.3	134.95	1.34767e+07
Dabur India Ltd.	2021	0.000265983	167219	47450.3	134.95	1.34767e+07
Deepak Nitrite Ltd.	2021	0.00354215	96170.1	47450.3	134.95	1.34767e+07
Delta Corp Ltd.	2021	0.00191612	455804	47450.3	134.95	1.34767e+07
Dilip Buildcon Ltd.	2021	0.000458063	46068.9	47450.3	134.95	1.34767e+07
Divi'S Laboratories Ltd.	2021	0.000772176	36494.9	47450.3	134.95	1.34767e+07
Dixon Technologies (India) Ltd.	2021	0.00279458	25610.5	47450.3	134.95	1.34767e+07
Dr. Lal Pathlabs Ltd.	2021	0.00187955	15873.2	47450.3	134.95	1.34767e+07
Dr. Reddy'S Laboratories Ltd.	2021	-0.000287297	44688	47450.3	134.95	1.34767e+07
E I D-Parry (India) Ltd.	2021	0.00114708	53220.3	47450.3	134.95	1.34767e+07
E I H Ltd.	2021	0.00104354	92839.3	47450.3	134.95	1.34767e+07
E P L Ltd.	2021	-0.000934113	50413.4	47450.3	134.95	1.34767e+07
Eclerx Services Ltd.	2021	0.00436544	7145.66	47450.3	134.95	1.34767e+07
Edelweiss Financial Services Ltd.	2021	0.0001282	325783	47450.3	134.95	1.34767e+07
Eicher Motors Ltd.	2021	-0.00010253	49474.8	47450.3	134.95	1.34767e+07
Elgi Equipments Ltd.	2021	0.00252653	46110.3	47450.3	134.95	1.34767e+07
Emami Ltd.	2021	0.000813685	77855.9	47450.3	134.95	1.34767e+07
Endurance Technologies Ltd.	2021	0.000655732	13652.4	47450.3	134.95	1.34767e+07
Engineers India Ltd.	2021	-0.000500789	269255	47450.3	134.95	1.34767e+07
Equitas Holdings Ltd.	2021	0.00193978	239158	47450.3	134.95	1.34767e+07
Eris Lifesciences Ltd.	2021	0.00106324	10557.7	47450.3	134.95	1.34767e+07
Escorts Ltd.	2021	0.00150614	91663.8	47450.3	134.95	1.34767e+07
Exide Industries Ltd.	2021	-0.000623972	323603	47450.3	134.95	1.34767e+07
F D C Ltd.	2021	-0.000384737	21078.2	47450.3	134.95	1.34767e+07
Federal Bank Ltd.	2021	0.000655318	1.50072e+06	47450.3	134.95	1.34767e+07
Finolex Cables Ltd.	2021	0.00160111	25909.6	47450.3	134.95	1.34767e+07
Finolex Industries Ltd.	2021	0.001845	107804	47450.3	134.95	1.34767e+07
Firstsource Solutions Ltd.	2021	0.0023829	410253	47450.3	134.95	1.34767e+07
Fortis Healthcare Ltd.	2021	0.00260355	277230	47450.3	134.95	1.34767e+07
G A I L (India) Ltd.	2021	3.76263e-05	1.13616e+06	47450.3	134.95	1.34767e+07
G M M Pfaudler Ltd.	2021	0.00108759	6860.51	47450.3	134.95	1.34767e+07
Garware Technical Fibres Ltd.	2021	0.00125738	2189.18	47450.3	134.95	1.34767e+07
General Insurance Corpn. Of India	2021	-3.57029e-05	90409	47450.3	134.95	1.34767e+07
Glaxosmithkline Pharmaceuticals Ltd.	2021	0.000389369	4932.77	47450.3	134.95	1.34767e+07
Glenmark Pharmaceuticals Ltd.	2021	0.000106729	138010	47450.3	134.95	1.34767e+07
Godfrey Phillips India Ltd.	2021	0.00053984	10114	47450.3	134.95	1.34767e+07
Godrej Agrovet Ltd.	2021	-0.000179444	47518.9	47450.3	134.95	1.34767e+07
Godrej Consumer Products Ltd.	2021	0.000988756	79485.2	47450.3	134.95	1.34767e+07
Godrej Industries Ltd.	2021	0.00156802	88034.8	47450.3	134.95	1.34767e+07
Godrej Properties Ltd.	2021	0.00115438	60485.6	47450.3	134.95	1.34767e+07
Granules India Ltd.	2021	-0.000281994	196506	47450.3	134.95	1.34767e+07
Graphite India Ltd.	2021	0.00190304	147725	47450.3	134.95	1.34767e+07
Grasim Industries Ltd.	2021	0.00210205	125208	47450.3	134.95	1.34767e+07
Great Eastern Shipping Co. Ltd.	2021	0.000261409	44054.4	47450.3	134.95	1.34767e+07
Grindwell Norton Ltd.	2021	0.00395622	12452.3	47450.3	134.95	1.34767e+07
Gujarat Alkalies & Chemicals Ltd.	2021	0.002507	47566	47450.3	134.95	1.34767e+07
Gujarat Gas Ltd.	2021	0.00209388	129752	47450.3	134.95	1.34767e+07
Gujarat Narmada Valley Fertilizers & Chemicals Ltd.	2021	0.00269689	105554	47450.3	134.95	1.34767e+07
Gujarat Pipavav Port Ltd.	2021	0.000190471	90827.4	47450.3	134.95	1.34767e+07
Gujarat State Fertilizers & Chemicals Ltd.	2021	0.00160847	220005	47450.3	134.95	1.34767e+07
Gujarat State Petronet Ltd.	2021	0.00119594	81163.6	47450.3	134.95	1.34767e+07
H C L Technologies Ltd.	2021	0.00119791	327770	47450.3	134.95	1.34767e+07
H D F C Bank Ltd.	2021	0.000177278	305268	47450.3	134.95	1.34767e+07
H D F C Life Insurance Co. Ltd.	2021	-0.000282587	609000	47450.3	134.95	1.34767e+07
H E G Ltd.	2021	0.0024997	32067.1	47450.3	134.95	1.34767e+07
H F C L Ltd.	2021	0.00433126	1.88178e+06	47450.3	134.95	1.34767e+07
Hathway Cable & Datacom Ltd.	2021	-0.00163494	712589	47450.3	134.95	1.34767e+07
Hatsun Agro Products Ltd.	2021	0.00226187	9459.03	47450.3	134.95	1.34767e+07
Havells India Ltd.	2021	0.00168489	105057	47450.3	134.95	1.34767e+07
Hero Motocorp Ltd.	2021	-0.000856785	37454.4	47450.3	134.95	1.34767e+07
Hikal Ltd.	2021	0.00450562	85564.1	47450.3	134.95	1.34767e+07
Hindalco Industries Ltd.	2021	0.00252841	621945	47450.3	134.95	1.34767e+07
Hindustan Copper Ltd.	2021	0.00279333	598598	47450.3	134.95	1.34767e+07
Hindustan Petroleum Corpn. Ltd.	2021	0.00108702	297808	47450.3	134.95	1.34767e+07
Hindustan Unilever Ltd.	2021	-0.000112477	111585	47450.3	134.95	1.34767e+07
Hindustan Zinc Ltd.	2021	0.00105201	136016	47450.3	134.95	1.34767e+07
Honeywell Automation India Ltd.	2021	0.000583488	522.335	47450.3	134.95	1.34767e+07
Housing & Urban Devp. Corpn. Ltd.	2021	-0.000216651	369406	47450.3	134.95	1.34767e+07
Housing Development Finance Corpn. Ltd.	2021	1.17076e-05	158208	47450.3	134.95	1.34767e+07
I C I C I Bank Ltd.	2021	0.00133469	832266	47450.3	134.95	1.34767e+07
I C I C I Lombard General Insurance Co. Ltd.	2021	-0.000407679	107461	47450.3	134.95	1.34767e+07
I C I C I Prudential Life Insurance Co. Ltd.	2021	0.000431554	103612	47450.3	134.95	1.34767e+07
I D B I Bank Ltd.	2021	0.00149824	1.91416e+06	47450.3	134.95	1.34767e+07
I D F C First Bank Ltd.	2021	0.000913347	2.9399e+06	47450.3	134.95	1.34767e+07
I D F C Ltd.	2021	0.00216334	1.10942e+06	47450.3	134.95	1.34767e+07
I F B Industries Ltd.	2021	-0.000284344	5093.77	47450.3	134.95	1.34767e+07
I I F L Finance Ltd.	2021	0.00356355	247943	47450.3	134.95	1.34767e+07
I R B Infrastructure Developers Ltd.	2021	0.00266654	233550	47450.3	134.95	1.34767e+07
I T C Ltd.	2021	8.59949e-05	1.69047e+06	47450.3	134.95	1.34767e+07
I T I Ltd.	2021	-0.000361976	70239.4	47450.3	134.95	1.34767e+07
India Cements Ltd.	2021	0.000348183	252177	47450.3	134.95	1.34767e+07
Indiabulls Housing Finance Ltd.	2021	-5.05475e-05	1.37764e+06	47450.3	134.95	1.34767e+07
Indiabulls Real Estate Ltd.	2021	0.00269011	1.16448e+06	47450.3	134.95	1.34767e+07
Indian Bank	2021	0.0018281	307885	47450.3	134.95	1.34767e+07
Indian Energy Exchange Ltd.	2021	0.00482876	530647	47450.3	134.95	1.34767e+07
Indian Hotels Co. Ltd.	2021	0.00156555	436188	47450.3	134.95	1.34767e+07
Indian Oil Corpn. Ltd.	2021	0.000698823	1.34004e+06	47450.3	134.95	1.34767e+07
Indian Overseas Bank	2021	0.00237485	2.26496e+06	47450.3	134.95	1.34767e+07
Indoco Remedies Ltd.	2021	0.00149606	24340.6	47450.3	134.95	1.34767e+07
Indraprastha Gas Ltd.	2021	-0.000299404	140013	47450.3	134.95	1.34767e+07
Indus Towers Ltd.	2021	0.000106237	264876	47450.3	134.95	1.34767e+07
Indusind Bank Ltd.	2021	-4.4723e-05	356186	47450.3	134.95	1.34767e+07
Infibeam Avenues Ltd.	2021	-0.000311893	861201	47450.3	134.95	1.34767e+07
Info Edge (India) Ltd.	2021	0.00056906	34991.1	47450.3	134.95	1.34767e+07
Infosys Ltd.	2021	0.00154385	437726	47450.3	134.95	1.34767e+07
Inox Leisure Ltd.	2021	0.000605252	60259.7	47450.3	134.95	1.34767e+07
Intellect Design Arena Ltd.	2021	0.0034498	55569.3	47450.3	134.95	1.34767e+07
Interglobe Aviation Ltd.	2021	0.000586677	65710.9	47450.3	134.95	1.34767e+07
Ipca Laboratories Ltd.	2021	4.17518e-06	17639.5	47450.3	134.95	1.34767e+07
J B Chemicals & Pharmaceuticals Ltd.	2021	0.00217584	11382.1	47450.3	134.95	1.34767e+07
J K Cement Ltd.	2021	0.00219732	8104.16	47450.3	134.95	1.34767e+07
J K Lakshmi Cement Ltd.	2021	0.00208527	42473.2	47450.3	134.95	1.34767e+07
J K Paper Ltd.	2021	0.00208543	163601	47450.3	134.95	1.34767e+07
J M Financial Ltd.	2021	-0.000617312	188368	47450.3	134.95	1.34767e+07
J S W Energy Ltd.	2021	0.00600759	346937	47450.3	134.95	1.34767e+07
J S W Steel Ltd.	2021	0.001963	453907	47450.3	134.95	1.34767e+07
Jamna Auto Inds. Ltd.	2021	0.00215218	143487	47450.3	134.95	1.34767e+07
Jindal Stainless (Hisar) Ltd.	2021	0.00347866	87018.4	47450.3	134.95	1.34767e+07
Jindal Stainless Ltd.	2021	0.00347799	234289	47450.3	134.95	1.34767e+07
Jindal Steel & Power Ltd.	2021	0.00109394	631741	47450.3	134.95	1.34767e+07
Jubilant Foodworks Ltd.	2021	0.00107813	35380	47450.3	134.95	1.34767e+07
Jubilant Pharmova Ltd.	2021	-0.00165595	25946.2	47450.3	134.95	1.34767e+07
Just Dial Ltd.	2021	0.000813232	175216	47450.3	134.95	1.34767e+07
Jyothy Labs Ltd.	2021	-0.000261239	56668.4	47450.3	134.95	1.34767e+07
K E C International Ltd.	2021	0.000967265	27336.7	47450.3	134.95	1.34767e+07
K N R Constructions Ltd.	2021	0.0023615	70455.1	47450.3	134.95	1.34767e+07
K P R Mill Ltd.	2021	0.00540977	16036.1	47450.3	134.95	1.34767e+07
K R B L Ltd.	2021	-8.05328e-05	100225	47450.3	134.95	1.34767e+07
Kajaria Ceramics Ltd.	2021	0.00241177	35167	47450.3	134.95	1.34767e+07
Kalpataru Power Transmission Ltd.	2021	0.000626155	53817.5	47450.3	134.95	1.34767e+07
Kansai Nerolac Paints Ltd.	2021	-0.000190699	23692	47450.3	134.95	1.34767e+07
Kei Industries Ltd.	2021	0.00362196	47758.3	47450.3	134.95	1.34767e+07
Kotak Mahindra Bank Ltd.	2021	-0.000363692	223474	47450.3	134.95	1.34767e+07
L & T Finance Holdings Ltd.	2021	-0.000610886	1.00077e+06	47450.3	134.95	1.34767e+07
L & T Technology Services Ltd.	2021	0.00332768	20907.3	47450.3	134.95	1.34767e+07
L I C Housing Finance Ltd.	2021	-0.000130439	225094	47450.3	134.95	1.34767e+07
Lakshmi Machine Works Ltd.	2021	0.00244304	1855.84	47450.3	134.95	1.34767e+07
Larsen & Toubro Infotech Ltd.	2021	0.00260013	20893.7	47450.3	134.95	1.34767e+07
Larsen & Toubro Ltd.	2021	0.00147592	158986	47450.3	134.95	1.34767e+07
Laurus Labs Ltd.	2021	0.00163906	246308	47450.3	134.95	1.34767e+07
Linde India Ltd.	2021	0.00373119	11000.9	47450.3	134.95	1.34767e+07
Lupin Ltd.	2021	-0.000308167	131640	47450.3	134.95	1.34767e+07
Lux Industries Ltd.	2021	0.00322289	5412.55	47450.3	134.95	1.34767e+07
M M T C Ltd.	2021	0.00157172	660897	47450.3	134.95	1.34767e+07
M O I L Ltd.	2021	0.00051654	79270.6	47450.3	134.95	1.34767e+07
M R F Ltd.	2021	-0.000272411	1210.06	47450.3	134.95	1.34767e+07
Mahanagar Gas Ltd.	2021	-0.000914365	38831.1	47450.3	134.95	1.34767e+07
Mahindra & Mahindra Financial Services Ltd.	2021	-0.000881328	612059	47450.3	134.95	1.34767e+07
Mahindra & Mahindra Ltd.	2021	0.000449907	206008	47450.3	134.95	1.34767e+07
Mahindra C I E Automotive Ltd.	2021	0.00114973	76124.7	47450.3	134.95	1.34767e+07
Mahindra Holidays & Resorts India Ltd.	2021	0.00117562	36685.3	47450.3	134.95	1.34767e+07
Mahindra Logistics Ltd.	2021	0.00190439	19750.1	47450.3	134.95	1.34767e+07
Manappuram Finance Ltd.	2021	-0.000178495	395751	47450.3	134.95	1.34767e+07
Mangalore Refinery & Petrochemicals Ltd.	2021	0.000697035	307406	47450.3	134.95	1.34767e+07
Marico Ltd.	2021	0.000830813	145323	47450.3	134.95	1.34767e+07
Maruti Suzuki India Ltd.	2021	-0.00014535	45007.1	47450.3	134.95	1.34767e+07
Mastek Ltd.	2021	0.00360497	28682.4	47450.3	134.95	1.34767e+07
Max Financial Services Ltd.	2021	0.00141232	48500	47450.3	134.95	1.34767e+07
Minda Industries Ltd.	2021	0.00446575	33193.2	47450.3	134.95	1.34767e+07
Mindtree Ltd.	2021	0.00419645	53387	47450.3	134.95	1.34767e+07
Motilal Oswal Financial Services Ltd.	2021	0.00158103	37246.2	47450.3	134.95	1.34767e+07
Mphasis Ltd.	2021	0.00324826	28804.9	47450.3	134.95	1.34767e+07
Multi Commodity Exchange Of India Ltd.	2021	-0.000483715	40408.5	47450.3	134.95	1.34767e+07
Muthoot Finance Ltd.	2021	0.000741378	59803.3	47450.3	134.95	1.34767e+07
N B C C (India) Ltd.	2021	0.00161091	1.17352e+06	47450.3	134.95	1.34767e+07
N C C Ltd.	2021	0.000388045	594001	47450.3	134.95	1.34767e+07
N H P C Ltd.	2021	0.000925914	925067	47450.3	134.95	1.34767e+07
N L C India Ltd.	2021	0.000402878	589476	47450.3	134.95	1.34767e+07
N M D C Ltd.	2021	0.000348655	928164	47450.3	134.95	1.34767e+07
N T P C Ltd.	2021	0.000922934	972400	47450.3	134.95	1.34767e+07
Narayana Hrudayalaya Ltd.	2021	0.00145302	20859.6	47450.3	134.95	1.34767e+07
Natco Pharma Ltd.	2021	-0.000275401	25093.2	47450.3	134.95	1.34767e+07
National Aluminium Co. Ltd.	2021	0.00306773	2.58187e+06	47450.3	134.95	1.34767e+07
Navin Fluorine Intl. Ltd.	2021	0.00185911	18822.9	47450.3	134.95	1.34767e+07
Nesco Ltd.	2021	0.000172696	9534.69	47450.3	134.95	1.34767e+07
Nestle India Ltd.	2021	0.0002796	4134.01	47450.3	134.95	1.34767e+07
Network18 Media & Invst. Ltd.	2021	0.0036185	307949	47450.3	134.95	1.34767e+07
New India Assurance Co. Ltd.	2021	0.000314128	78714	47450.3	134.95	1.34767e+07
Nippon Life India Asset Mgmt. Ltd.	2021	0.000489137	71626.8	47450.3	134.95	1.34767e+07
Nocil Ltd.	2021	0.00149386	148413	47450.3	134.95	1.34767e+07
Oberoi Realty Ltd.	2021	0.00153597	66791.7	47450.3	134.95	1.34767e+07
Oil & Natural Gas Corpn. Ltd.	2021	0.00154876	1.67422e+06	47450.3	134.95	1.34767e+07
Oil India Ltd.	2021	0.00229809	118078	47450.3	134.95	1.34767e+07
Oracle Financial Services Software Ltd.	2021	0.000652958	8028.25	47450.3	134.95	1.34767e+07
P C B L Ltd.	2021	0.00120541	194401	47450.3	134.95	1.34767e+07
P I Industries Ltd.	2021	0.00119096	23716.3	47450.3	134.95	1.34767e+07
P N B Housing Finance Ltd.	2021	0.0011351	29281.1	47450.3	134.95	1.34767e+07
P N C Infratech Ltd.	2021	0.00152361	207015	47450.3	134.95	1.34767e+07
P V R Ltd.	2021	-0.00030063	103973	47450.3	134.95	1.34767e+07
Page Industries Ltd.	2021	0.0014075	1471.66	47450.3	134.95	1.34767e+07
Persistent Systems Ltd.	2021	0.00472273	16399.6	47450.3	134.95	1.34767e+07
Petronet L N G Ltd.	2021	-0.000621709	194314	47450.3	134.95	1.34767e+07
Pfizer Ltd.	2021	-0.000133663	5353.43	47450.3	134.95	1.34767e+07
Phoenix Mills Ltd.	2021	0.00097836	14064.9	47450.3	134.95	1.34767e+07
Pidilite Industries Ltd.	2021	0.00129935	37075.5	47450.3	134.95	1.34767e+07
Piramal Enterprises Ltd.	2021	0.00234227	71866.4	47450.3	134.95	1.34767e+07
Poly Medicure Ltd.	2021	0.00255078	24193.8	47450.3	134.95	1.34767e+07
Poonawalla Fincorp Ltd.	2021	0.00672849	610583	47450.3	134.95	1.34767e+07
Power Finance Corpn. Ltd.	2021	3.38137e-05	447879	47450.3	134.95	1.34767e+07
Power Grid Corpn. Of India Ltd.	2021	0.0014897	628241	47450.3	134.95	1.34767e+07
Praj Industries Ltd.	2021	0.00411335	180380	47450.3	134.95	1.34767e+07
Prestige Estates Projects Ltd.	2021	0.00223492	79642.6	47450.3	134.95	1.34767e+07
Prism Johnson Ltd.	2021	0.00162021	50394	47450.3	134.95	1.34767e+07
Procter & Gamble Health Ltd.	2021	-0.00112408	1108.86	47450.3	134.95	1.34767e+07
Procter & Gamble Hygiene & Health Care Ltd.	2021	0.00136866	1096.62	47450.3	134.95	1.34767e+07
Punjab National Bank	2021	0.000193763	7.50007e+06	47450.3	134.95	1.34767e+07
Quess Corp Ltd.	2021	0.00192219	66383.7	47450.3	134.95	1.34767e+07
R B L Bank Ltd.	2021	-0.00255802	842074	47450.3	134.95	1.34767e+07
R E C Ltd.	2021	-0.000102615	365425	47450.3	134.95	1.34767e+07
R H I Magnesita India Ltd.	2021	0.00157519	21085.1	47450.3	134.95	1.34767e+07
Radico Khaitan Ltd.	2021	0.00396525	61541.6	47450.3	134.95	1.34767e+07
Rain Industries Ltd.	2021	0.00198098	341245	47450.3	134.95	1.34767e+07
Rajesh Exports Ltd.	2021	0.00169858	65044.5	47450.3	134.95	1.34767e+07
Rallis India Ltd.	2021	-0.000116738	69077.8	47450.3	134.95	1.34767e+07
Ramco Cements Ltd.	2021	0.000928974	36435.2	47450.3	134.95	1.34767e+07
Rashtriya Chemicals & Fertilizers Ltd.	2021	0.00136257	537218	47450.3	134.95	1.34767e+07
Ratnamani Metals & Tubes Ltd.	2021	0.00067919	3575.49	47450.3	134.95	1.34767e+07
Redington (India) Ltd.	2021	0.0031045	173714	47450.3	134.95	1.34767e+07
Relaxo Footwears Ltd.	2021	0.00180229	21284.5	47450.3	134.95	1.34767e+07
Reliance Industries Ltd.	2021	0.000700193	534815	47450.3	134.95	1.34767e+07
S B I Life Insurance Co. Ltd.	2021	0.00109155	644249	47450.3	134.95	1.34767e+07
S I S Ltd.	2021	0.000327249	44767.3	47450.3	134.95	1.34767e+07
S J V N Ltd.	2021	0.000725969	322545	47450.3	134.95	1.34767e+07
S K F India Ltd.	2021	0.00309561	4382.9	47450.3	134.95	1.34767e+07
S R F Ltd.	2021	0.00304873	21158.2	47450.3	134.95	1.34767e+07
Sanofi India Ltd.	2021	-0.000215253	2039.41	47450.3	134.95	1.34767e+07
Saregama India Ltd.	2021	0.00744343	4053.55	47450.3	134.95	1.34767e+07
Schaeffler India Ltd.	2021	0.002567	1088.19	47450.3	134.95	1.34767e+07
Sequent Scientific Ltd.	2021	-0.00047131	252658	47450.3	134.95	1.34767e+07
Sheela Foam Ltd.	2021	0.00228186	2181.2	47450.3	134.95	1.34767e+07
Shilpa Medicare Ltd.	2021	0.000662647	57308.2	47450.3	134.95	1.34767e+07
Shipping Corpn. Of India Ltd.	2021	0.00159405	328004	47450.3	134.95	1.34767e+07
Shree Cement Ltd.	2021	0.00047136	1860.13	47450.3	134.95	1.34767e+07
Shriram City Union Finance Ltd.	2021	0.00198626	4505.47	47450.3	134.95	1.34767e+07
Shriram Transport Finance Co. Ltd.	2021	0.000496395	111688	47450.3	134.95	1.34767e+07
Siemens Ltd.	2021	0.00158171	26836.4	47450.3	134.95	1.34767e+07
Sobha Ltd.	2021	0.00323123	35845.6	47450.3	134.95	1.34767e+07
Solar Industries India Ltd.	2021	0.00319267	4750.61	47450.3	134.95	1.34767e+07
Sonata Software Ltd.	2021	0.00321739	41973.7	47450.3	134.95	1.34767e+07
State Bank Of India	2021	0.00199061	2.00348e+06	47450.3	134.95	1.34767e+07
Steel Authority Of India Ltd.	2021	0.00121368	4.08637e+06	47450.3	134.95	1.34767e+07
Sterlite Technologies Ltd.	2021	0.00155488	82747	47450.3	134.95	1.34767e+07
Strides Pharma Science Ltd.	2021	-0.00298756	71116.1	47450.3	134.95	1.34767e+07
Sudarshan Chemical Inds. Ltd.	2021	0.000562036	38062.6	47450.3	134.95	1.34767e+07
Sun Pharma Advanced Research Co. Ltd.	2021	0.00137042	130891	47450.3	134.95	1.34767e+07
Sun Pharmaceutical Inds. Ltd.	2021	0.00135412	267285	47450.3	134.95	1.34767e+07
Sun T V Network Ltd.	2021	3.8071e-05	141815	47450.3	134.95	1.34767e+07
Sundram Fasteners Ltd.	2021	0.00207897	13072.3	47450.3	134.95	1.34767e+07
Sunteck Realty Ltd.	2021	0.00133185	68899.3	47450.3	134.95	1.34767e+07
Supreme Industries Ltd.	2021	0.00103338	10836	47450.3	134.95	1.34767e+07
Supreme Petrochem Ltd.	2021	0.00274346	12446.2	47450.3	134.95	1.34767e+07
Suzlon Energy Ltd.	2021	0.00145162	1.50035e+07	47450.3	134.95	1.34767e+07
Symphony Ltd.	2021	-0.000134507	7568.15	47450.3	134.95	1.34767e+07
Syngene International Ltd.	2021	-0.000112273	59711.4	47450.3	134.95	1.34767e+07
T C I Express Ltd.	2021	0.00340952	8144.8	47450.3	134.95	1.34767e+07
T T K Prestige Ltd.	2021	0.00179942	2702.21	47450.3	134.95	1.34767e+07
T V S Motor Co. Ltd.	2021	0.000948211	133881	47450.3	134.95	1.34767e+07
Tanla Platforms Ltd.	2021	0.00414033	47622.6	47450.3	134.95	1.34767e+07
Tata Chemicals Ltd.	2021	0.00242938	282611	47450.3	134.95	1.34767e+07
Tata Coffee Ltd.	2021	0.00271814	353848	47450.3	134.95	1.34767e+07
Tata Communications Ltd.	2021	0.00111651	45284.4	47450.3	134.95	1.34767e+07
Tata Consultancy Services Ltd.	2021	0.000833195	155535	47450.3	134.95	1.34767e+07
Tata Consumer Products Ltd.	2021	0.00083834	207742	47450.3	134.95	1.34767e+07
Tata Elxsi Ltd.	2021	0.00459116	32060.5	47450.3	134.95	1.34767e+07
Tata Investment Corpn. Ltd.	2021	0.00112253	7961.15	47450.3	134.95	1.34767e+07
Tata Motors Ltd.	2021	0.00373125	3.52456e+06	47450.3	134.95	1.34767e+07
Tata Power Co. Ltd.	2021	0.00413348	4.47371e+06	47450.3	134.95	1.34767e+07
Tata Steel Ltd.	2021	0.00190644	784415	47450.3	134.95	1.34767e+07
Tata Teleservices (Maharashtra) Ltd.	2021	0.0131576	1.57238e+06	47450.3	134.95	1.34767e+07
Teamlease Services Ltd.	2021	0.00171678	3780.5	47450.3	134.95	1.34767e+07
Tech Mahindra Ltd.	2021	0.00234244	173764	47450.3	134.95	1.34767e+07
Thermax Ltd.	2021	0.0026753	6664.34	47450.3	134.95	1.34767e+07
Thyrocare Technologies Ltd.	2021	0.00067324	20113.4	47450.3	134.95	1.34767e+07
Timken India Ltd.	2021	0.0016569	5598.69	47450.3	134.95	1.34767e+07
Titan Company Ltd.	2021	0.00196522	88060.7	47450.3	134.95	1.34767e+07
Torrent Pharmaceuticals Ltd.	2021	0.00064546	13925.5	47450.3	134.95	1.34767e+07
Torrent Power Ltd.	2021	0.00220725	84512.9	47450.3	134.95	1.34767e+07
Trent Ltd.	2021	0.00181595	52700.9	47450.3	134.95	1.34767e+07
Trident Ltd.	2021	0.00573377	5.23798e+06	47450.3	134.95	1.34767e+07
Triveni Turbine Ltd.	2021	0.00340414	66757.2	47450.3	134.95	1.34767e+07
Tube Investments Of India Ltd.	2021	0.00315462	14603.2	47450.3	134.95	1.34767e+07
Tv18 Broadcast Ltd.	2021	0.00145237	848257	47450.3	134.95	1.34767e+07
U P L Ltd.	2021	0.00184204	256458	47450.3	134.95	1.34767e+07
Uco Bank	2021	-2.78194e-05	1.22335e+06	47450.3	134.95	1.34767e+07
Uflex Ltd.	2021	0.00116106	35941.4	47450.3	134.95	1.34767e+07
Ultratech Cement Ltd.	2021	0.00142878	22600.7	47450.3	134.95	1.34767e+07
Union Bank Of India	2021	0.00117863	1.51364e+06	47450.3	134.95	1.34767e+07
United Breweries Ltd.	2021	0.00117008	191346	47450.3	134.95	1.34767e+07
V I P Industries Ltd.	2021	0.00148268	71606.7	47450.3	134.95	1.34767e+07
V-Guard Industries Ltd.	2021	0.000546496	93173.1	47450.3	134.95	1.34767e+07
V-Mart Retail Ltd.	2021	0.0016623	12506.7	47450.3	134.95	1.34767e+07
Vaibhav Global Ltd.	2021	0.000485836	4295.94	47450.3	134.95	1.34767e+07
Vakrangee Ltd.	2021	-0.00139962	4295.94	47450.3	134.95	1.34767e+07
Vardhman Textiles Ltd.	2021	0.00309141	4295.94	47450.3	134.95	1.34767e+07
Varun Beverages Ltd.	2021	0.00133908	4295.94	47450.3	134.95	1.34767e+07
Vedanta Ltd.	2021	0.00280205	4295.94	47450.3	134.95	1.34767e+07
Venky'S (India) Ltd.	2021	0.0017136	4295.94	47450.3	134.95	1.34767e+07
Vinati Organics Ltd.	2021	0.00192112	12506.7	47450.3	134.95	1.34767e+07
Vodafone Idea Ltd.	2021	0.001025	9.29155e+07	47450.3	134.95	1.34767e+07
Voltas Ltd.	2021	0.00147448	81434	47450.3	134.95	1.34767e+07
Wabco India Ltd.	2021	0.00168457	765.903	47450.3	134.95	1.34767e+07
Welspun Corp Ltd.	2021	0.00112102	237832	47450.3	134.95	1.34767e+07
Welspun India Ltd.	2021	0.00284656	311917	47450.3	134.95	1.34767e+07
Whirlpool Of India Ltd.	2021	-0.00156033	12456.9	47450.3	134.95	1.34767e+07
Wipro Ltd.	2021	0.00238061	591628	47450.3	134.95	1.34767e+07
Wockhardt Ltd.	2021	-0.000944005	119106	47450.3	134.95	1.34767e+07
Yes Bank Ltd.	2021	-0.00111484	2.14536e+07	47450.3	134.95	1.34767e+07
Zee Entertainment Enterprises Ltd.	2021	0.00153964	1.05189e+06	47450.3	134.95	1.34767e+07
Zensar Technologies Ltd.	2021	0.00313073	244474	47450.3	134.95	1.34767e+07
Zydus Wellness Ltd.	2021	-0.000538513	3501.97	47450.3	134.95	1.34767e+07

## Sheet:  2017 BSE
Company_Name	YEAR	Adjusted_Return	Adjusted_Share Traded	Gold_Price	WPI_INDEX	GDP_YEAR
3M India Ltd.	2017	0.00224146	473.218	28966.9	114.075	1.18195e+07
A B B India Ltd.	2017	0.00117762	21801.2	28966.9	114.075	1.18195e+07
A C C Ltd.	2017	0.00108224	26365.5	28966.9	114.075	1.18195e+07
A I A Engineering Ltd.	2017	0.000697658	11873.4	28966.9	114.075	1.18195e+07
A P L Apollo Tubes Ltd.	2017	0.00309182	8023.55	28966.9	114.075	1.18195e+07
A U Small Finance Bank Ltd.	2017	0.000845768	641498	28966.9	114.075	1.18195e+07
Aarti Drugs Ltd.	2017	0.00014655	2843.21	28966.9	114.075	1.18195e+07
Aarti Industries Ltd.	2017	0.00193985	13896.7	28966.9	114.075	1.18195e+07
Abbott India Ltd.	2017	0.000688667	1729.58	28966.9	114.075	1.18195e+07
Adani Enterprises Ltd.	2017	0.00313227	1.03622e+06	28966.9	114.075	1.18195e+07
Adani Ports & Special Economic Zone Ltd.	2017	0.00157142	356026	28966.9	114.075	1.18195e+07
Adani Transmission Ltd.	2017	0.00552369	208010	28966.9	114.075	1.18195e+07
Aditya Birla Capital Ltd.	2017	-0.00120385	920812	28966.9	114.075	1.18195e+07
Aditya Birla Fashion & Retail Ltd.	2017	0.000838461	184213	28966.9	114.075	1.18195e+07
Advanced Enzyme Technologies Ltd.	2017	-0.0012527	40091.5	28966.9	114.075	1.18195e+07
Aegis Logistics Ltd.	2017	0.00310739	153315	28966.9	114.075	1.18195e+07
Ajanta Pharma Ltd.	2017	-0.000769806	33718.5	28966.9	114.075	1.18195e+07
Alembic Pharmaceuticals Ltd.	2017	-0.000505896	19613.9	28966.9	114.075	1.18195e+07
Alkem Laboratories Ltd.	2017	0.00114551	7938.03	28966.9	114.075	1.18195e+07
Alkyl Amines Chemicals Ltd.	2017	0.00310544	5145.77	28966.9	114.075	1.18195e+07
Allcargo Logistics Ltd.	2017	0.000520782	232645	28966.9	114.075	1.18195e+07
Alok Industries Ltd.	2017	0.000356496	1.64045e+06	28966.9	114.075	1.18195e+07
Amara Raja Batteries Ltd.	2017	-0.00023141	50578.8	28966.9	114.075	1.18195e+07
Ambuja Cements Ltd.	2017	0.000937303	171410	28966.9	114.075	1.18195e+07
Apollo Hospitals Enterprise Ltd.	2017	2.50996e-06	23802.1	28966.9	114.075	1.18195e+07
Apollo Tyres Ltd.	2017	0.00145775	322496	28966.9	114.075	1.18195e+07
Asahi India Glass Ltd.	2017	0.0028819	27231	28966.9	114.075	1.18195e+07
Ashok Leyland Ltd.	2017	0.00155459	1.32139e+06	28966.9	114.075	1.18195e+07
Asian Paints Ltd.	2017	0.0010225	83917.5	28966.9	114.075	1.18195e+07
Astral Ltd.	2017	0.0030666	73592.7	28966.9	114.075	1.18195e+07
Astrazeneca Pharma India Ltd.	2017	0.000866547	4843.24	28966.9	114.075	1.18195e+07
Atul Ltd.	2017	0.00115039	6987.38	28966.9	114.075	1.18195e+07
Aurobindo Pharma Ltd.	2017	9.334e-05	243700	28966.9	114.075	1.18195e+07
Avanti Feeds Ltd.	2017	0.00661232	18727	28966.9	114.075	1.18195e+07
Avenue Supermarts Ltd.	2017	0.00246222	349793	28966.9	114.075	1.18195e+07
Axis Bank Ltd.	2017	0.000852728	631721	28966.9	114.075	1.18195e+07
B A S F India Ltd.	2017	0.00248776	6045.6	28966.9	114.075	1.18195e+07
B E M L Ltd.	2017	0.00190508	69357.3	28966.9	114.075	1.18195e+07
Bajaj Auto Ltd.	2017	0.000958531	29062.3	28966.9	114.075	1.18195e+07
Bajaj Electricals Ltd.	2017	0.00317373	76990.5	28966.9	114.075	1.18195e+07
Bajaj Finance Ltd.	2017	0.00277069	143163	28966.9	114.075	1.18195e+07
Bajaj Finserv Ltd.	2017	0.00221907	23675.9	28966.9	114.075	1.18195e+07
Bajaj Holdings & Invst. Ltd.	2017	0.00181007	23396.2	28966.9	114.075	1.18195e+07
Balaji Amines Ltd.	2017	0.00249305	13840.4	28966.9	114.075	1.18195e+07
Balkrishna Industries Ltd.	2017	0.00314351	230574	28966.9	114.075	1.18195e+07
Balrampur Chini Mills Ltd.	2017	2.44473e-05	212068	28966.9	114.075	1.18195e+07
Bank Of Baroda	2017	0.000302496	1.7212e+06	28966.9	114.075	1.18195e+07
Bank Of India	2017	0.0018017	531793	28966.9	114.075	1.18195e+07
Bank Of Maharashtra	2017	-0.000974948	65690.9	28966.9	114.075	1.18195e+07
Bata India Ltd.	2017	0.0019314	52128.3	28966.9	114.075	1.18195e+07
Bayer Cropscience Ltd.	2017	0.000190291	5278.44	28966.9	114.075	1.18195e+07
Berger Paints India Ltd.	2017	0.000970129	131349	28966.9	114.075	1.18195e+07
Bharat Electronics Ltd.	2017	0.00137682	317541	28966.9	114.075	1.18195e+07
Bharat Forge Ltd.	2017	0.00185909	84150.1	28966.9	114.075	1.18195e+07
Bharat Heavy Electricals Ltd.	2017	0.00043162	819187	28966.9	114.075	1.18195e+07
Bharat Petroleum Corpn. Ltd.	2017	0.000702464	204470	28966.9	114.075	1.18195e+07
Bharti Airtel Ltd.	2017	0.00224137	2.3135e+06	28966.9	114.075	1.18195e+07
Biocon Ltd.	2017	0.00214953	251560	28966.9	114.075	1.18195e+07
Birla Corporation Ltd.	2017	0.00221666	9133.27	28966.9	114.075	1.18195e+07
Birlasoft Ltd.	2017	0.00115108	152796	28966.9	114.075	1.18195e+07
Blue Dart Express Ltd.	2017	6.57804e-05	3345.75	28966.9	114.075	1.18195e+07
Blue Star Ltd.	2017	0.00205326	26601.8	28966.9	114.075	1.18195e+07
Bombay Burmah Trdg. Corpn. Ltd.	2017	0.0047251	75438.1	28966.9	114.075	1.18195e+07
Bosch Ltd.	2017	-0.000139344	2092.56	28966.9	114.075	1.18195e+07
Brigade Enterprises Ltd.	2017	0.00288126	29032.2	28966.9	114.075	1.18195e+07
Brightcom Group Ltd.	2017	-0.00153887	546055	28966.9	114.075	1.18195e+07
Britannia Industries Ltd.	2017	0.00200059	12287.1	28966.9	114.075	1.18195e+07
C C L Products (India) Ltd.	2017	0.00047106	9872.73	28966.9	114.075	1.18195e+07
C E S C Ltd.	2017	0.00196183	52472.6	28966.9	114.075	1.18195e+07
Cadila Healthcare Ltd.	2017	0.000800795	125208	28966.9	114.075	1.18195e+07
Can Fin Homes Ltd.	2017	0.00143997	28470.9	28966.9	114.075	1.18195e+07
Canara Bank	2017	0.00135949	263019	28966.9	114.075	1.18195e+07
Caplin Point Laboratories Ltd.	2017	0.00245351	17453.8	28966.9	114.075	1.18195e+07
Carborundum Universal Ltd.	2017	0.00158509	54744.1	28966.9	114.075	1.18195e+07
Castrol India Ltd.	2017	1.7784e-05	114895	28966.9	114.075	1.18195e+07
Ceat Ltd.	2017	0.0019851	79355.2	28966.9	114.075	1.18195e+07
Central Bank Of India	2017	-0.000573686	601800	28966.9	114.075	1.18195e+07
Century Plyboards (India) Ltd.	2017	0.00269067	37579.9	28966.9	114.075	1.18195e+07
Century Textiles & Inds. Ltd.	2017	0.00216493	105626	28966.9	114.075	1.18195e+07
Cera Sanitaryware Ltd.	2017	0.00244157	1497.41	28966.9	114.075	1.18195e+07
Chambal Fertilisers & Chemicals Ltd.	2017	0.00307598	220064	28966.9	114.075	1.18195e+07
Cholamandalam Financial Holdings Ltd.	2017	0.00198374	35102.1	28966.9	114.075	1.18195e+07
Cholamandalam Investment & Finance Co. Ltd.	2017	0.00120056	61306.5	28966.9	114.075	1.18195e+07
Cipla Ltd.	2017	0.000225344	147659	28966.9	114.075	1.18195e+07
City Union Bank Ltd.	2017	0.00162361	156473	28966.9	114.075	1.18195e+07
Coal India Ltd.	2017	-0.000601374	388273	28966.9	114.075	1.18195e+07
Cochin Shipyard Ltd.	2017	0.000233352	163383	28966.9	114.075	1.18195e+07
Coforge Ltd.	2017	0.00164212	27095.1	28966.9	114.075	1.18195e+07
Colgate-Palmolive (India) Ltd.	2017	0.00080466	31970.9	28966.9	114.075	1.18195e+07
Container Corpn. Of India Ltd.	2017	0.00155625	34549.6	28966.9	114.075	1.18195e+07
Coromandel International Ltd.	2017	0.00263314	50053.2	28966.9	114.075	1.18195e+07
Crisil Ltd.	2017	-0.00076012	7658.64	28966.9	114.075	1.18195e+07
Crompton Greaves Consumer Electricals Ltd.	2017	0.00230379	179459	28966.9	114.075	1.18195e+07
Cummins India Ltd.	2017	0.000274912	32504.2	28966.9	114.075	1.18195e+07
Cyient Ltd.	2017	0.00066122	33908	28966.9	114.075	1.18195e+07
D C M Shriram Ltd.	2017	0.0037112	25860.7	28966.9	114.075	1.18195e+07
D L F Ltd.	2017	0.00313627	1.0375e+06	28966.9	114.075	1.18195e+07
Dabur India Ltd.	2017	0.000951138	101668	28966.9	114.075	1.18195e+07
Deepak Nitrite Ltd.	2017	0.00349377	78157.1	28966.9	114.075	1.18195e+07
Delta Corp Ltd.	2017	0.00386981	828721	28966.9	114.075	1.18195e+07
Dilip Buildcon Ltd.	2017	0.00589363	58236.4	28966.9	114.075	1.18195e+07
Divi'S Laboratories Ltd.	2017	0.00138552	241505	28966.9	114.075	1.18195e+07
Dixon Technologies (India) Ltd.	2017	0.0014966	42161.8	28966.9	114.075	1.18195e+07
Dr. Lal Pathlabs Ltd.	2017	-0.000761412	41499.8	28966.9	114.075	1.18195e+07
Dr. Reddy'S Laboratories Ltd.	2017	-0.000979019	52026.2	28966.9	114.075	1.18195e+07
E I D-Parry (India) Ltd.	2017	0.00130327	86046.9	28966.9	114.075	1.18195e+07
E I H Ltd.	2017	0.00166395	36468	28966.9	114.075	1.18195e+07
E P L Ltd.	2017	0.00070462	10814.4	28966.9	114.075	1.18195e+07
Eclerx Services Ltd.	2017	0.000478377	10793.9	28966.9	114.075	1.18195e+07
Edelweiss Financial Services Ltd.	2017	0.00440151	1.01736e+06	28966.9	114.075	1.18195e+07
Eicher Motors Ltd.	2017	0.00119931	5182.1	28966.9	114.075	1.18195e+07
Elgi Equipments Ltd.	2017	0.00209108	11365.4	28966.9	114.075	1.18195e+07
Emami Ltd.	2017	0.00099388	21783.6	28966.9	114.075	1.18195e+07
Endurance Technologies Ltd.	2017	0.00346658	25194.7	28966.9	114.075	1.18195e+07
Engineers India Ltd.	2017	0.00102493	302638	28966.9	114.075	1.18195e+07
Equitas Holdings Ltd.	2017	-3.92998e-05	255292	28966.9	114.075	1.18195e+07
Eris Lifesciences Ltd.	2017	0.0010979	74250.9	28966.9	114.075	1.18195e+07
Escorts Ltd.	2017	0.00355663	260138	28966.9	114.075	1.18195e+07
Exide Industries Ltd.	2017	0.000794406	213337	28966.9	114.075	1.18195e+07
F D C Ltd.	2017	0.000503995	124189	28966.9	114.075	1.18195e+07
Federal Bank Ltd.	2017	0.00200335	898811	28966.9	114.075	1.18195e+07
Finolex Cables Ltd.	2017	0.00218414	24791	28966.9	114.075	1.18195e+07
Finolex Industries Ltd.	2017	0.00159549	18207.9	28966.9	114.075	1.18195e+07
Firstsource Solutions Ltd.	2017	0.000281375	700860	28966.9	114.075	1.18195e+07
Fortis Healthcare Ltd.	2017	-0.000633058	996847	28966.9	114.075	1.18195e+07
G A I L (India) Ltd.	2017	0.00163916	346260	28966.9	114.075	1.18195e+07
G M M Pfaudler Ltd.	2017	0.00164189	7550.96	28966.9	114.075	1.18195e+07
Garware Technical Fibres Ltd.	2017	0.00175257	3486.08	28966.9	114.075	1.18195e+07
General Insurance Corpn. Of India	2017	-0.000581548	153835	28966.9	114.075	1.18195e+07
Glaxosmithkline Pharmaceuticals Ltd.	2017	-0.000400639	1673.01	28966.9	114.075	1.18195e+07
Glenmark Pharmaceuticals Ltd.	2017	-0.00164024	93946.7	28966.9	114.075	1.18195e+07
Godfrey Phillips India Ltd.	2017	-0.000173595	20444.1	28966.9	114.075	1.18195e+07
Godrej Agrovet Ltd.	2017	-0.000111204	145191	28966.9	114.075	1.18195e+07
Godrej Consumer Products Ltd.	2017	0.0010691	33690.7	28966.9	114.075	1.18195e+07
Godrej Industries Ltd.	2017	0.00135834	39115.9	28966.9	114.075	1.18195e+07
Godrej Properties Ltd.	2017	0.00311562	56066.4	28966.9	114.075	1.18195e+07
Granules India Ltd.	2017	0.000842907	206321	28966.9	114.075	1.18195e+07
Graphite India Ltd.	2017	0.00915655	267243	28966.9	114.075	1.18195e+07
Grasim Industries Ltd.	2017	0.00118265	88193.3	28966.9	114.075	1.18195e+07
Great Eastern Shipping Co. Ltd.	2017	0.000296608	33472	28966.9	114.075	1.18195e+07
Grindwell Norton Ltd.	2017	0.00206201	9638.85	28966.9	114.075	1.18195e+07
Gujarat Alkalies & Chemicals Ltd.	2017	0.0031219	29574.2	28966.9	114.075	1.18195e+07
Gujarat Gas Ltd.	2017	0.00185618	13860.3	28966.9	114.075	1.18195e+07
Gujarat Narmada Valley Fertilizers & Chemicals Ltd.	2017	0.00315631	225636	28966.9	114.075	1.18195e+07
Gujarat Pipavav Port Ltd.	2017	0.000107533	160001	28966.9	114.075	1.18195e+07
Gujarat State Fertilizers & Chemicals Ltd.	2017	0.00179567	381490	28966.9	114.075	1.18195e+07
Gujarat State Petronet Ltd.	2017	0.00193739	114213	28966.9	114.075	1.18195e+07
H C L Technologies Ltd.	2017	0.000260115	198085	28966.9	114.075	1.18195e+07
H D F C Bank Ltd.	2017	0.00182879	181491	28966.9	114.075	1.18195e+07
H D F C Life Insurance Co. Ltd.	2017	0.000462614	1.31744e+06	28966.9	114.075	1.18195e+07
H E G Ltd.	2017	0.0108588	65186.1	28966.9	114.075	1.18195e+07
H F C L Ltd.	2017	0.00320103	1.9238e+06	28966.9	114.075	1.18195e+07
Hathway Cable & Datacom Ltd.	2017	0.000353147	211884	28966.9	114.075	1.18195e+07
Hatsun Agro Products Ltd.	2017	0.00330025	9754.63	28966.9	114.075	1.18195e+07
Havells India Ltd.	2017	0.00199268	95914.3	28966.9	114.075	1.18195e+07
Hero Motocorp Ltd.	2017	0.000955656	40394.8	28966.9	114.075	1.18195e+07
Hikal Ltd.	2017	0.000381815	24199.4	28966.9	114.075	1.18195e+07
Hindalco Industries Ltd.	2017	0.00219384	959557	28966.9	114.075	1.18195e+07
Hindustan Copper Ltd.	2017	0.00193776	535669	28966.9	114.075	1.18195e+07
Hindustan Petroleum Corpn. Ltd.	2017	0.00119757	308789	28966.9	114.075	1.18195e+07
Hindustan Unilever Ltd.	2017	0.00201683	114884	28966.9	114.075	1.18195e+07
Hindustan Zinc Ltd.	2017	0.000707079	187881	28966.9	114.075	1.18195e+07
Honeywell Automation India Ltd.	2017	0.00308119	333.06	28966.9	114.075	1.18195e+07
Housing & Urban Devp. Corpn. Ltd.	2017	0.000530778	1.54852e+06	28966.9	114.075	1.18195e+07
Housing Development Finance Corpn. Ltd.	2017	0.00137813	208355	28966.9	114.075	1.18195e+07
I C I C I Bank Ltd.	2017	0.00123466	1.49363e+06	28966.9	114.075	1.18195e+07
I C I C I Lombard General Insurance Co. Ltd.	2017	0.000517858	155417	28966.9	114.075	1.18195e+07
I C I C I Prudential Life Insurance Co. Ltd.	2017	0.000817692	136189	28966.9	114.075	1.18195e+07
I D B I Bank Ltd.	2017	-0.000620131	497682	28966.9	114.075	1.18195e+07
I D F C First Bank Ltd.	2017	-0.000459624	1.0314e+06	28966.9	114.075	1.18195e+07
I D F C Ltd.	2017	0.000570127	1.31081e+06	28966.9	114.075	1.18195e+07
I F B Industries Ltd.	2017	0.00442929	8727.1	28966.9	114.075	1.18195e+07
I I F L Finance Ltd.	2017	0.00376466	114344	28966.9	114.075	1.18195e+07
I R B Infrastructure Developers Ltd.	2017	0.000584194	219323	28966.9	114.075	1.18195e+07
I T C Ltd.	2017	0.000316308	1.01045e+06	28966.9	114.075	1.18195e+07
I T I Ltd.	2017	0.00416253	400904	28966.9	114.075	1.18195e+07
India Cements Ltd.	2017	0.00160633	498791	28966.9	114.075	1.18195e+07
Indiabulls Housing Finance Ltd.	2017	0.00237467	387871	28966.9	114.075	1.18195e+07
Indiabulls Real Estate Ltd.	2017	0.00434409	1.9958e+06	28966.9	114.075	1.18195e+07
Indian Bank	2017	0.00210355	128773	28966.9	114.075	1.18195e+07
Indian Energy Exchange Ltd.	2017	-4.03678e-05	29792.8	28966.9	114.075	1.18195e+07
Indian Hotels Co. Ltd.	2017	0.00104694	144306	28966.9	114.075	1.18195e+07
Indian Oil Corpn. Ltd.	2017	0.000466117	382821	28966.9	114.075	1.18195e+07
Indian Overseas Bank	2017	-0.00037194	206981	28966.9	114.075	1.18195e+07
Indoco Remedies Ltd.	2017	0.000233658	29880.7	28966.9	114.075	1.18195e+07
Indraprastha Gas Ltd.	2017	0.00231958	55653.5	28966.9	114.075	1.18195e+07
Indus Towers Ltd.	2017	0.000401006	2.27434e+06	28966.9	114.075	1.18195e+07
Indusind Bank Ltd.	2017	0.00163097	97144	28966.9	114.075	1.18195e+07
Infibeam Avenues Ltd.	2017	0.000768163	579511	28966.9	114.075	1.18195e+07
Info Edge (India) Ltd.	2017	0.00176398	20836	28966.9	114.075	1.18195e+07
Infosys Ltd.	2017	0.000177104	356015	28966.9	114.075	1.18195e+07
Inox Leisure Ltd.	2017	0.000910169	45952.5	28966.9	114.075	1.18195e+07
Intellect Design Arena Ltd.	2017	0.000839209	148396	28966.9	114.075	1.18195e+07
Interglobe Aviation Ltd.	2017	0.00152103	48198.9	28966.9	114.075	1.18195e+07
Ipca Laboratories Ltd.	2017	0.000470953	36223.6	28966.9	114.075	1.18195e+07
J B Chemicals & Pharmaceuticals Ltd.	2017	-0.000237985	17681.6	28966.9	114.075	1.18195e+07
J K Cement Ltd.	2017	0.00169747	16650.4	28966.9	114.075	1.18195e+07
J K Lakshmi Cement Ltd.	2017	0.00076757	28225.7	28966.9	114.075	1.18195e+07
J K Paper Ltd.	2017	0.00167417	156846	28966.9	114.075	1.18195e+07
J M Financial Ltd.	2017	0.00334055	282941	28966.9	114.075	1.18195e+07
J S W Energy Ltd.	2017	0.0016866	1.19779e+06	28966.9	114.075	1.18195e+07
J S W Steel Ltd.	2017	0.00199281	535746	28966.9	114.075	1.18195e+07
Jamna Auto Inds. Ltd.	2017	0.00328985	203154	28966.9	114.075	1.18195e+07
Jindal Stainless (Hisar) Ltd.	2017	0.00351854	161309	28966.9	114.075	1.18195e+07
Jindal Stainless Ltd.	2017	0.0040153	168889	28966.9	114.075	1.18195e+07
Jindal Steel & Power Ltd.	2017	0.00430876	1.49513e+06	28966.9	114.075	1.18195e+07
Jubilant Foodworks Ltd.	2017	0.00287034	67210.8	28966.9	114.075	1.18195e+07
Jubilant Pharmova Ltd.	2017	0.000852655	80555.4	28966.9	114.075	1.18195e+07
Just Dial Ltd.	2017	0.00162452	314740	28966.9	114.075	1.18195e+07
Jyothy Labs Ltd.	2017	0.00053149	20870.6	28966.9	114.075	1.18195e+07
K E C International Ltd.	2017	0.00399011	110917	28966.9	114.075	1.18195e+07
K N R Constructions Ltd.	2017	0.00261619	52208.4	28966.9	114.075	1.18195e+07
K P R Mill Ltd.	2017	0.00137349	10244.1	28966.9	114.075	1.18195e+07
K R B L Ltd.	2017	0.0026662	17155.8	28966.9	114.075	1.18195e+07
Kajaria Ceramics Ltd.	2017	0.00160655	74885.8	28966.9	114.075	1.18195e+07
Kalpataru Power Transmission Ltd.	2017	0.00233279	17940.8	28966.9	114.075	1.18195e+07
Kansai Nerolac Paints Ltd.	2017	0.00221922	19386.3	28966.9	114.075	1.18195e+07
Kei Industries Ltd.	2017	0.00439462	99861	28966.9	114.075	1.18195e+07
Kotak Mahindra Bank Ltd.	2017	0.00141243	406642	28966.9	114.075	1.18195e+07
L & T Finance Holdings Ltd.	2017	0.00270101	751353	28966.9	114.075	1.18195e+07
L & T Technology Services Ltd.	2017	0.00094658	6797.77	28966.9	114.075	1.18195e+07
L I C Housing Finance Ltd.	2017	0.000239647	151900	28966.9	114.075	1.18195e+07
Lakshmi Machine Works Ltd.	2017	0.00149343	5721.04	28966.9	114.075	1.18195e+07
Larsen & Toubro Infotech Ltd.	2017	0.00199962	11630.2	28966.9	114.075	1.18195e+07
Larsen & Toubro Ltd.	2017	0.00129356	304153	28966.9	114.075	1.18195e+07
Laurus Labs Ltd.	2017	0.000526038	34581	28966.9	114.075	1.18195e+07
Linde India Ltd.	2017	0.0016731	9225.06	28966.9	114.075	1.18195e+07
Lupin Ltd.	2017	-0.00214484	165616	28966.9	114.075	1.18195e+07
Lux Industries Ltd.	2017	0.00284743	18177.9	28966.9	114.075	1.18195e+07
M M T C Ltd.	2017	0.00070178	532367	28966.9	114.075	1.18195e+07
M O I L Ltd.	2017	0.00112318	80374.7	28966.9	114.075	1.18195e+07
M R F Ltd.	2017	0.00145704	1330.35	28966.9	114.075	1.18195e+07
Mahanagar Gas Ltd.	2017	0.00115166	23024	28966.9	114.075	1.18195e+07
Mahindra & Mahindra Financial Services Ltd.	2017	0.00223073	211685	28966.9	114.075	1.18195e+07
Mahindra & Mahindra Ltd.	2017	0.000828201	123225	28966.9	114.075	1.18195e+07
Mahindra C I E Automotive Ltd.	2017	0.00138768	58272.9	28966.9	114.075	1.18195e+07
Mahindra Holidays & Resorts India Ltd.	2017	0.000905687	51439.3	28966.9	114.075	1.18195e+07
Mahindra Logistics Ltd.	2017	7.8624e-05	99883.3	28966.9	114.075	1.18195e+07
Manappuram Finance Ltd.	2017	0.00214127	791115	28966.9	114.075	1.18195e+07
Mangalore Refinery & Petrochemicals Ltd.	2017	0.000925349	262185	28966.9	114.075	1.18195e+07
Marico Ltd.	2017	0.000900085	127296	28966.9	114.075	1.18195e+07
Maruti Suzuki India Ltd.	2017	0.00229328	49766	28966.9	114.075	1.18195e+07
Mastek Ltd.	2017	0.00309274	104144	28966.9	114.075	1.18195e+07
Max Financial Services Ltd.	2017	0.000241748	260386	28966.9	114.075	1.18195e+07
Minda Industries Ltd.	2017	0.00563557	21786.9	28966.9	114.075	1.18195e+07
Mindtree Ltd.	2017	0.000732525	44775.3	28966.9	114.075	1.18195e+07
Motilal Oswal Financial Services Ltd.	2017	0.00424413	23548.4	28966.9	114.075	1.18195e+07
Mphasis Ltd.	2017	0.00119992	15603.4	28966.9	114.075	1.18195e+07
Multi Commodity Exchange Of India Ltd.	2017	-0.00127476	47591.4	28966.9	114.075	1.18195e+07
Muthoot Finance Ltd.	2017	0.00202719	61848	28966.9	114.075	1.18195e+07
N B C C (India) Ltd.	2017	0.00151104	257258	28966.9	114.075	1.18195e+07
N C C Ltd.	2017	0.00187954	589454	28966.9	114.075	1.18195e+07
N H P C Ltd.	2017	0.000721605	681203	28966.9	114.075	1.18195e+07
N L C India Ltd.	2017	0.00134572	91847	28966.9	114.075	1.18195e+07
N M D C Ltd.	2017	0.000230133	306500	28966.9	114.075	1.18195e+07
N T P C Ltd.	2017	0.000274259	662171	28966.9	114.075	1.18195e+07
Narayana Hrudayalaya Ltd.	2017	-0.000529643	30373.6	28966.9	114.075	1.18195e+07
Natco Pharma Ltd.	2017	0.00201548	51663.2	28966.9	114.075	1.18195e+07
National Aluminium Co. Ltd.	2017	0.0010406	573888	28966.9	114.075	1.18195e+07
Navin Fluorine Intl. Ltd.	2017	0.001983	9821.66	28966.9	114.075	1.18195e+07
Nesco Ltd.	2017	0.00108767	3613.1	28966.9	114.075	1.18195e+07
Nestle India Ltd.	2017	0.00104469	6347.75	28966.9	114.075	1.18195e+07
Network18 Media & Invst. Ltd.	2017	0.00226649	368365	28966.9	114.075	1.18195e+07
New India Assurance Co. Ltd.	2017	-0.000758191	31669.3	28966.9	114.075	1.18195e+07
Nippon Life India Asset Mgmt. Ltd.	2017	0.000207538	285957	28966.9	114.075	1.18195e+07
Nocil Ltd.	2017	0.00385753	316770	28966.9	114.075	1.18195e+07
Oberoi Realty Ltd.	2017	0.00176909	50151.6	28966.9	114.075	1.18195e+07
Oil & Natural Gas Corpn. Ltd.	2017	3.85068e-05	675993	28966.9	114.075	1.18195e+07
Oil India Ltd.	2017	0.000319639	47085.9	28966.9	114.075	1.18195e+07
Oracle Financial Services Software Ltd.	2017	0.00102712	36504.4	28966.9	114.075	1.18195e+07
P C B L Ltd.	2017	0.00587821	89860.3	28966.9	114.075	1.18195e+07
P I Industries Ltd.	2017	0.000629201	38626.2	28966.9	114.075	1.18195e+07
P N B Housing Finance Ltd.	2017	0.00192515	38855.9	28966.9	114.075	1.18195e+07
P N C Infratech Ltd.	2017	0.00266606	84664.7	28966.9	114.075	1.18195e+07
P V R Ltd.	2017	0.0007722	18707.4	28966.9	114.075	1.18195e+07
Page Industries Ltd.	2017	0.00249125	1797.11	28966.9	114.075	1.18195e+07
Persistent Systems Ltd.	2017	0.000552166	14205.3	28966.9	114.075	1.18195e+07
Petronet L N G Ltd.	2017	0.00117933	720129	28966.9	114.075	1.18195e+07
Pfizer Ltd.	2017	0.000516774	2779.92	28966.9	114.075	1.18195e+07
Phoenix Mills Ltd.	2017	0.00203101	17249.1	28966.9	114.075	1.18195e+07
Pidilite Industries Ltd.	2017	0.00160224	94598.5	28966.9	114.075	1.18195e+07
Piramal Enterprises Ltd.	2017	0.00239905	22384.8	28966.9	114.075	1.18195e+07
Poly Medicure Ltd.	2017	0.00159115	18532.6	28966.9	114.075	1.18195e+07
Poonawalla Fincorp Ltd.	2017	0.00174825	177951	28966.9	114.075	1.18195e+07
Power Finance Corpn. Ltd.	2017	-0.000119301	593343	28966.9	114.075	1.18195e+07
Power Grid Corpn. Of India Ltd.	2017	0.000256481	439125	28966.9	114.075	1.18195e+07
Praj Industries Ltd.	2017	0.00114679	200844	28966.9	114.075	1.18195e+07
Prestige Estates Projects Ltd.	2017	0.00251506	35738	28966.9	114.075	1.18195e+07
Prism Johnson Ltd.	2017	0.00121127	65934.3	28966.9	114.075	1.18195e+07
Procter & Gamble Health Ltd.	2017	0.00105271	4234	28966.9	114.075	1.18195e+07
Procter & Gamble Hygiene & Health Care Ltd.	2017	0.00121268	1503.8	28966.9	114.075	1.18195e+07
Punjab National Bank	2017	0.00150083	1.23984e+06	28966.9	114.075	1.18195e+07
Quess Corp Ltd.	2017	0.00225138	16630.7	28966.9	114.075	1.18195e+07
R B L Bank Ltd.	2017	0.0016148	320054	28966.9	114.075	1.18195e+07
R E C Ltd.	2017	0.000834566	734779	28966.9	114.075	1.18195e+07
R H I Magnesita India Ltd.	2017	0.00147111	12557.2	28966.9	114.075	1.18195e+07
Radico Khaitan Ltd.	2017	0.00392233	183271	28966.9	114.075	1.18195e+07
Rain Industries Ltd.	2017	0.00771174	510405	28966.9	114.075	1.18195e+07
Rajesh Exports Ltd.	2017	0.00212094	61443.3	28966.9	114.075	1.18195e+07
Rallis India Ltd.	2017	0.00102492	77489.3	28966.9	114.075	1.18195e+07
Ramco Cements Ltd.	2017	0.00131234	26721.3	28966.9	114.075	1.18195e+07
Rashtriya Chemicals & Fertilizers Ltd.	2017	0.00283704	816211	28966.9	114.075	1.18195e+07
Ratnamani Metals & Tubes Ltd.	2017	0.00180638	3803.19	28966.9	114.075	1.18195e+07
Redington (India) Ltd.	2017	0.00246371	349091	28966.9	114.075	1.18195e+07
Relaxo Footwears Ltd.	2017	0.0021432	14208.4	28966.9	114.075	1.18195e+07
Reliance Industries Ltd.	2017	0.00211348	5.22374e+06	28966.9	114.075	1.18195e+07
S B I Life Insurance Co. Ltd.	2017	-8.28575e-05	150271	28966.9	114.075	1.18195e+07
S I S Ltd.	2017	0.00184956	26609	28966.9	114.075	1.18195e+07
S J V N Ltd.	2017	0.000478645	133874	28966.9	114.075	1.18195e+07
S K F India Ltd.	2017	0.00160713	5219.93	28966.9	114.075	1.18195e+07
S R F Ltd.	2017	0.000983009	14927.4	28966.9	114.075	1.18195e+07
Sanofi India Ltd.	2017	0.000397337	2253.16	28966.9	114.075	1.18195e+07
Saregama India Ltd.	2017	0.00530651	46138.3	28966.9	114.075	1.18195e+07
Schaeffler India Ltd.	2017	0.00157617	972.887	28966.9	114.075	1.18195e+07
Sequent Scientific Ltd.	2017	-0.000630969	54479.4	28966.9	114.075	1.18195e+07
Sheela Foam Ltd.	2017	0.00243736	4087.59	28966.9	114.075	1.18195e+07
Shilpa Medicare Ltd.	2017	-0.000546835	5775.67	28966.9	114.075	1.18195e+07
Shipping Corpn. Of India Ltd.	2017	0.00177025	304105	28966.9	114.075	1.18195e+07
Shree Cement Ltd.	2017	0.000976545	2238.9	28966.9	114.075	1.18195e+07
Shriram City Union Finance Ltd.	2017	0.000489337	4517.23	28966.9	114.075	1.18195e+07
Shriram Transport Finance Co. Ltd.	2017	0.00203847	67669.6	28966.9	114.075	1.18195e+07
Siemens Ltd.	2017	0.000436885	24099.8	28966.9	114.075	1.18195e+07
Sobha Ltd.	2017	0.0035722	65389.5	28966.9	114.075	1.18195e+07
Solar Industries India Ltd.	2017	0.00205814	12984.1	28966.9	114.075	1.18195e+07
Sonata Software Ltd.	2017	0.00129813	49178.5	28966.9	114.075	1.18195e+07
State Bank Of India	2017	0.000944808	1.61597e+06	28966.9	114.075	1.18195e+07
Steel Authority Of India Ltd.	2017	0.00234611	981444	28966.9	114.075	1.18195e+07
Sterlite Technologies Ltd.	2017	0.00440166	337395	28966.9	114.075	1.18195e+07
Strides Pharma Science Ltd.	2017	-0.000984592	59364.1	28966.9	114.075	1.18195e+07
Sudarshan Chemical Inds. Ltd.	2017	0.000482097	28499.5	28966.9	114.075	1.18195e+07
Sun Pharma Advanced Research Co. Ltd.	2017	0.00199064	99412.6	28966.9	114.075	1.18195e+07
Sun Pharmaceutical Inds. Ltd.	2017	-0.000436128	440260	28966.9	114.075	1.18195e+07
Sun T V Network Ltd.	2017	0.00258322	133543	28966.9	114.075	1.18195e+07
Sundram Fasteners Ltd.	2017	0.00278116	34408.9	28966.9	114.075	1.18195e+07
Sunteck Realty Ltd.	2017	0.00514254	76094.4	28966.9	114.075	1.18195e+07
Supreme Industries Ltd.	2017	0.00146852	11702.8	28966.9	114.075	1.18195e+07
Supreme Petrochem Ltd.	2017	0.0025164	13783.9	28966.9	114.075	1.18195e+07
Suzlon Energy Ltd.	2017	0.000357935	6.63651e+06	28966.9	114.075	1.18195e+07
Symphony Ltd.	2017	0.00161677	14097	28966.9	114.075	1.18195e+07
Syngene International Ltd.	2017	-0.000263797	93392.6	28966.9	114.075	1.18195e+07
T C I Express Ltd.	2017	0.00261389	7804.64	28966.9	114.075	1.18195e+07
T T K Prestige Ltd.	2017	0.0011913	3072.9	28966.9	114.075	1.18195e+07
T V S Motor Co. Ltd.	2017	0.00288214	100096	28966.9	114.075	1.18195e+07
Tanla Platforms Ltd.	2017	-0.00148006	141044	28966.9	114.075	1.18195e+07
Tata Chemicals Ltd.	2017	0.00146307	104040	28966.9	114.075	1.18195e+07
Tata Coffee Ltd.	2017	0.00144546	124115	28966.9	114.075	1.18195e+07
Tata Communications Ltd.	2017	0.000344266	68015.9	28966.9	114.075	1.18195e+07
Tata Consultancy Services Ltd.	2017	0.000528803	84579.5	28966.9	114.075	1.18195e+07
Tata Consumer Products Ltd.	2017	0.00375653	602287	28966.9	114.075	1.18195e+07
Tata Elxsi Ltd.	2017	0.00133747	67817.9	28966.9	114.075	1.18195e+07
Tata Investment Corpn. Ltd.	2017	0.00176169	12090.5	28966.9	114.075	1.18195e+07
Tata Motors Ltd.	2017	-0.000442802	1.10917e+06	28966.9	114.075	1.18195e+07
Tata Power Co. Ltd.	2017	0.000866611	528841	28966.9	114.075	1.18195e+07
Tata Steel Ltd.	2017	0.00240759	595004	28966.9	114.075	1.18195e+07
Tata Teleservices (Maharashtra) Ltd.	2017	0.000642572	1.17837e+06	28966.9	114.075	1.18195e+07
Teamlease Services Ltd.	2017	0.00411416	3495.64	28966.9	114.075	1.18195e+07
Tech Mahindra Ltd.	2017	0.000104582	233921	28966.9	114.075	1.18195e+07
Thermax Ltd.	2017	0.00181988	17004.8	28966.9	114.075	1.18195e+07
Thyrocare Technologies Ltd.	2017	-0.000109848	39384.4	28966.9	114.075	1.18195e+07
Timken India Ltd.	2017	0.00129296	7791.82	28966.9	114.075	1.18195e+07
Titan Company Ltd.	2017	0.00362757	133416	28966.9	114.075	1.18195e+07
Torrent Pharmaceuticals Ltd.	2017	0.000231675	94712.6	28966.9	114.075	1.18195e+07
Torrent Power Ltd.	2017	0.00186433	167040	28966.9	114.075	1.18195e+07
Trent Ltd.	2017	0.00207717	43874.2	28966.9	114.075	1.18195e+07
Trident Ltd.	2017	0.00161248	300304	28966.9	114.075	1.18195e+07
Triveni Turbine Ltd.	2017	0.000434884	20432.2	28966.9	114.075	1.18195e+07
Tube Investments Of India Ltd.	2017	4.21914e-05	67542.5	28966.9	114.075	1.18195e+07
Tv18 Broadcast Ltd.	2017	0.00200317	955790	28966.9	114.075	1.18195e+07
U P L Ltd.	2017	0.000607198	98555.8	28966.9	114.075	1.18195e+07
Uco Bank	2017	-0.000495925	148629	28966.9	114.075	1.18195e+07
Uflex Ltd.	2017	0.00226939	34254.5	28966.9	114.075	1.18195e+07
Ultratech Cement Ltd.	2017	0.00105318	17794.3	28966.9	114.075	1.18195e+07
Union Bank Of India	2017	0.000543424	544528	28966.9	114.075	1.18195e+07
United Breweries Ltd.	2017	0.00129092	23626.7	28966.9	114.075	1.18195e+07
V I P Industries Ltd.	2017	0.00422938	81658.9	28966.9	114.075	1.18195e+07
V-Guard Industries Ltd.	2017	0.00295348	149424	28966.9	114.075	1.18195e+07
V-Mart Retail Ltd.	2017	0.00463307	5451.94	28966.9	114.075	1.18195e+07
Vaibhav Global Ltd.	2017	0.00357776	435.707	28966.9	114.075	1.18195e+07
Vakrangee Ltd.	2017	0.00450188	435.707	28966.9	114.075	1.18195e+07
Vardhman Textiles Ltd.	2017	0.000799813	435.707	28966.9	114.075	1.18195e+07
Varun Beverages Ltd.	2017	0.00188474	435.707	28966.9	114.075	1.18195e+07
Vedanta Ltd.	2017	0.00163647	435.707	28966.9	114.075	1.18195e+07
Venky'S (India) Ltd.	2017	0.00732418	435.707	28966.9	114.075	1.18195e+07
Vinati Organics Ltd.	2017	0.00209775	5451.94	28966.9	114.075	1.18195e+07
Vodafone Idea Ltd.	2017	0.00156217	2.68143e+06	28966.9	114.075	1.18195e+07
Voltas Ltd.	2017	0.00274241	115158	28966.9	114.075	1.18195e+07
Wabco India Ltd.	2017	0.00134519	1839.23	28966.9	114.075	1.18195e+07
Welspun Corp Ltd.	2017	0.00231803	175267	28966.9	114.075	1.18195e+07
Welspun India Ltd.	2017	8.88135e-05	248610	28966.9	114.075	1.18195e+07
Whirlpool Of India Ltd.	2017	0.00208779	13186.5	28966.9	114.075	1.18195e+07
Wipro Ltd.	2017	0.00118243	274884	28966.9	114.075	1.18195e+07
Wockhardt Ltd.	2017	0.00135094	242819	28966.9	114.075	1.18195e+07
Yes Bank Ltd.	2017	0.00122395	359735	28966.9	114.075	1.18195e+07
Zee Entertainment Enterprises Ltd.	2017	0.000965759	149763	28966.9	114.075	1.18195e+07
Zensar Technologies Ltd.	2017	-0.000280027	5576.01	28966.9	114.075	1.18195e+07
Zydus Wellness Ltd.	2017	0.000735245	3207.88	28966.9	114.075	1.18195e+07

## Sheet:  2018 BSE
Company_Name	YEAR	Adjusted_Return	Adjusted_Share Traded	Gold_Price	WPI_INDEX	GDP_YEAR
3M India Ltd.	2018	0.000397107	358.28	30613.6	118.942	1.25844e+07
A B B India Ltd.	2018	-0.000192517	66818.5	30613.6	118.942	1.25844e+07
A C C Ltd.	2018	-0.000582395	35049.5	30613.6	118.942	1.25844e+07
A I A Engineering Ltd.	2018	0.000391531	18960.3	30613.6	118.942	1.25844e+07
A P L Apollo Tubes Ltd.	2018	-0.0021937	6706.88	30613.6	118.942	1.25844e+07
A U Small Finance Bank Ltd.	2018	-0.000269772	172374	30613.6	118.942	1.25844e+07
Aarti Drugs Ltd.	2018	-0.000421221	3337.61	30613.6	118.942	1.25844e+07
Aarti Industries Ltd.	2018	0.000984126	18861.3	30613.6	118.942	1.25844e+07
Abbott India Ltd.	2018	0.00132104	1409.02	30613.6	118.942	1.25844e+07
Adani Enterprises Ltd.	2018	-7.25919e-05	1.0173e+06	30613.6	118.942	1.25844e+07
Adani Ports & Special Economic Zone Ltd.	2018	-9.79825e-05	673002	30613.6	118.942	1.25844e+07
Adani Transmission Ltd.	2018	-0.000230421	100597	30613.6	118.942	1.25844e+07
Aditya Birla Capital Ltd.	2018	-0.00249966	341018	30613.6	118.942	1.25844e+07
Aditya Birla Fashion & Retail Ltd.	2018	0.000672159	161699	30613.6	118.942	1.25844e+07
Advanced Enzyme Technologies Ltd.	2018	-0.00227388	39488.8	30613.6	118.942	1.25844e+07
Aegis Logistics Ltd.	2018	-0.00131078	13778	30613.6	118.942	1.25844e+07
Ajanta Pharma Ltd.	2018	-0.000889945	28374.8	30613.6	118.942	1.25844e+07
Alembic Pharmaceuticals Ltd.	2018	0.000492207	13600.5	30613.6	118.942	1.25844e+07
Alkem Laboratories Ltd.	2018	-0.000488608	15872.5	30613.6	118.942	1.25844e+07
Alkyl Amines Chemicals Ltd.	2018	0.000713208	1390.26	30613.6	118.942	1.25844e+07
Allcargo Logistics Ltd.	2018	-0.00258862	57089.8	30613.6	118.942	1.25844e+07
Alok Industries Ltd.	2018	-0.000366647	1.88847e+06	30613.6	118.942	1.25844e+07
Amara Raja Batteries Ltd.	2018	-0.000449039	24787.2	30613.6	118.942	1.25844e+07
Ambuja Cements Ltd.	2018	-0.000716463	379164	30613.6	118.942	1.25844e+07
Apollo Hospitals Enterprise Ltd.	2018	0.000220476	39747.6	30613.6	118.942	1.25844e+07
Apollo Tyres Ltd.	2018	-0.000511023	177857	30613.6	118.942	1.25844e+07
Asahi India Glass Ltd.	2018	-0.0014969	28762.1	30613.6	118.942	1.25844e+07
Ashok Leyland Ltd.	2018	-0.000749065	1.58033e+06	30613.6	118.942	1.25844e+07
Asian Paints Ltd.	2018	0.000747897	107559	30613.6	118.942	1.25844e+07
Astral Ltd.	2018	0.0012378	12188.8	30613.6	118.942	1.25844e+07
Astrazeneca Pharma India Ltd.	2018	0.00084599	4625.1	30613.6	118.942	1.25844e+07
Atul Ltd.	2018	0.000933212	3117.49	30613.6	118.942	1.25844e+07
Aurobindo Pharma Ltd.	2018	0.000342723	170570	30613.6	118.942	1.25844e+07
Avanti Feeds Ltd.	2018	-0.00327303	77870.1	30613.6	118.942	1.25844e+07
Avenue Supermarts Ltd.	2018	0.00133045	107910	30613.6	118.942	1.25844e+07
Axis Bank Ltd.	2018	0.000414618	586853	30613.6	118.942	1.25844e+07
B A S F India Ltd.	2018	-0.00124701	3002.48	30613.6	118.942	1.25844e+07
B E M L Ltd.	2018	-0.00225634	92092.3	30613.6	118.942	1.25844e+07
Bajaj Auto Ltd.	2018	-0.000780764	35326.6	30613.6	118.942	1.25844e+07
Bajaj Electricals Ltd.	2018	0.000110434	62467.1	30613.6	118.942	1.25844e+07
Bajaj Finance Ltd.	2018	0.0017385	126925	30613.6	118.942	1.25844e+07
Bajaj Finserv Ltd.	2018	0.000965155	19158.7	30613.6	118.942	1.25844e+07
Bajaj Holdings & Invst. Ltd.	2018	0.000154688	5673.35	30613.6	118.942	1.25844e+07
Balaji Amines Ltd.	2018	-0.00123582	7667.88	30613.6	118.942	1.25844e+07
Balkrishna Industries Ltd.	2018	-0.000958834	41128.8	30613.6	118.942	1.25844e+07
Balrampur Chini Mills Ltd.	2018	-0.00116094	724677	30613.6	118.942	1.25844e+07
Bank Of Baroda	2018	-0.00115488	1.7693e+06	30613.6	118.942	1.25844e+07
Bank Of India	2018	-0.00193056	844208	30613.6	118.942	1.25844e+07
Bank Of Maharashtra	2018	-0.0017675	130485	30613.6	118.942	1.25844e+07
Bata India Ltd.	2018	0.00166197	53219.5	30613.6	118.942	1.25844e+07
Bayer Cropscience Ltd.	2018	-0.000222019	1866.65	30613.6	118.942	1.25844e+07
Berger Paints India Ltd.	2018	0.000908932	81048.7	30613.6	118.942	1.25844e+07
Bharat Electronics Ltd.	2018	-0.00293835	708441	30613.6	118.942	1.25844e+07
Bharat Forge Ltd.	2018	-0.00145234	102284	30613.6	118.942	1.25844e+07
Bharat Heavy Electricals Ltd.	2018	-0.00119719	813609	30613.6	118.942	1.25844e+07
Bharat Petroleum Corpn. Ltd.	2018	-0.00130648	375361	30613.6	118.942	1.25844e+07
Bharti Airtel Ltd.	2018	-0.00203578	670903	30613.6	118.942	1.25844e+07
Biocon Ltd.	2018	0.000612305	193776	30613.6	118.942	1.25844e+07
Birla Corporation Ltd.	2018	-0.00291727	16695.9	30613.6	118.942	1.25844e+07
Birlasoft Ltd.	2018	0.000563384	150123	30613.6	118.942	1.25844e+07
Blue Dart Express Ltd.	2018	-0.00137599	1675.41	30613.6	118.942	1.25844e+07
Blue Star Ltd.	2018	-0.00112922	15745.7	30613.6	118.942	1.25844e+07
Bombay Burmah Trdg. Corpn. Ltd.	2018	-0.00084234	33396.9	30613.6	118.942	1.25844e+07
Bosch Ltd.	2018	-2.01375e-05	1075.61	30613.6	118.942	1.25844e+07
Brigade Enterprises Ltd.	2018	-0.00137079	11670.3	30613.6	118.942	1.25844e+07
Brightcom Group Ltd.	2018	-0.00334865	524087	30613.6	118.942	1.25844e+07
Britannia Industries Ltd.	2018	0.00117931	13423.9	30613.6	118.942	1.25844e+07
C C L Products (India) Ltd.	2018	-0.00040892	9998.78	30613.6	118.942	1.25844e+07
C E S C Ltd.	2018	-0.00184523	35341.7	30613.6	118.942	1.25844e+07
Cadila Healthcare Ltd.	2018	-0.0008483	137475	30613.6	118.942	1.25844e+07
Can Fin Homes Ltd.	2018	-0.00202192	106732	30613.6	118.942	1.25844e+07
Canara Bank	2018	-0.00100523	431164	30613.6	118.942	1.25844e+07
Caplin Point Laboratories Ltd.	2018	-0.00204339	7420.55	30613.6	118.942	1.25844e+07
Carborundum Universal Ltd.	2018	-0.000180428	27675.5	30613.6	118.942	1.25844e+07
Castrol India Ltd.	2018	-0.000944226	142227	30613.6	118.942	1.25844e+07
Ceat Ltd.	2018	-0.00156428	45811.4	30613.6	118.942	1.25844e+07
Central Bank Of India	2018	-0.00289448	322519	30613.6	118.942	1.25844e+07
Century Plyboards (India) Ltd.	2018	-0.00262279	38285.5	30613.6	118.942	1.25844e+07
Century Textiles & Inds. Ltd.	2018	-0.0017167	75738.5	30613.6	118.942	1.25844e+07
Cera Sanitaryware Ltd.	2018	-0.00189982	815.264	30613.6	118.942	1.25844e+07
Chambal Fertilisers & Chemicals Ltd.	2018	-0.000238836	110736	30613.6	118.942	1.25844e+07
Cholamandalam Financial Holdings Ltd.	2018	-0.00119653	20882.1	30613.6	118.942	1.25844e+07
Cholamandalam Investment & Finance Co. Ltd.	2018	-0.000104921	26299.4	30613.6	118.942	1.25844e+07
Cipla Ltd.	2018	-0.000627857	187352	30613.6	118.942	1.25844e+07
City Union Bank Ltd.	2018	0.000763684	105612	30613.6	118.942	1.25844e+07
Coal India Ltd.	2018	-0.000471375	272427	30613.6	118.942	1.25844e+07
Cochin Shipyard Ltd.	2018	-0.00153195	15323	30613.6	118.942	1.25844e+07
Coforge Ltd.	2018	0.00235378	72044.8	30613.6	118.942	1.25844e+07
Colgate-Palmolive (India) Ltd.	2018	0.000816559	34183.2	30613.6	118.942	1.25844e+07
Container Corpn. Of India Ltd.	2018	5.31483e-05	29101.8	30613.6	118.942	1.25844e+07
Coromandel International Ltd.	2018	-0.000755721	23233.5	30613.6	118.942	1.25844e+07
Crisil Ltd.	2018	-0.000632274	2026.33	30613.6	118.942	1.25844e+07
Crompton Greaves Consumer Electricals Ltd.	2018	-0.000822063	103623	30613.6	118.942	1.25844e+07
Cummins India Ltd.	2018	-0.000334301	62558.3	30613.6	118.942	1.25844e+07
Cyient Ltd.	2018	0.000312456	29529.3	30613.6	118.942	1.25844e+07
D C M Shriram Ltd.	2018	-0.00186574	38135.5	30613.6	118.942	1.25844e+07
D L F Ltd.	2018	-0.00145676	510862	30613.6	118.942	1.25844e+07
Dabur India Ltd.	2018	0.000852051	193028	30613.6	118.942	1.25844e+07
Deepak Nitrite Ltd.	2018	-0.000217654	59357.5	30613.6	118.942	1.25844e+07
Delta Corp Ltd.	2018	-0.000666854	478281	30613.6	118.942	1.25844e+07
Dilip Buildcon Ltd.	2018	-0.00345555	60814.1	30613.6	118.942	1.25844e+07
Divi'S Laboratories Ltd.	2018	0.00128987	48043.2	30613.6	118.942	1.25844e+07
Dixon Technologies (India) Ltd.	2018	-0.00283931	6261.86	30613.6	118.942	1.25844e+07
Dr. Lal Pathlabs Ltd.	2018	0.000150343	13804	30613.6	118.942	1.25844e+07
Dr. Reddy'S Laboratories Ltd.	2018	0.000338848	78813.4	30613.6	118.942	1.25844e+07
E I D-Parry (India) Ltd.	2018	-0.00249553	34563.3	30613.6	118.942	1.25844e+07
E I H Ltd.	2018	0.00121223	65156.3	30613.6	118.942	1.25844e+07
E P L Ltd.	2018	-0.00116656	16344	30613.6	118.942	1.25844e+07
Eclerx Services Ltd.	2018	-0.00153772	3348.62	30613.6	118.942	1.25844e+07
Edelweiss Financial Services Ltd.	2018	-0.00182728	335886	30613.6	118.942	1.25844e+07
Eicher Motors Ltd.	2018	-0.000869985	4439.58	30613.6	118.942	1.25844e+07
Elgi Equipments Ltd.	2018	-0.000467281	26838.5	30613.6	118.942	1.25844e+07
Emami Ltd.	2018	-0.00182668	35133.1	30613.6	118.942	1.25844e+07
Endurance Technologies Ltd.	2018	-0.000281827	6391.63	30613.6	118.942	1.25844e+07
Engineers India Ltd.	2018	-0.00178633	192172	30613.6	118.942	1.25844e+07
Equitas Holdings Ltd.	2018	-0.00063799	303872	30613.6	118.942	1.25844e+07
Eris Lifesciences Ltd.	2018	-0.000519862	10422.3	30613.6	118.942	1.25844e+07
Escorts Ltd.	2018	-0.000367138	138564	30613.6	118.942	1.25844e+07
Exide Industries Ltd.	2018	0.000770323	115964	30613.6	118.942	1.25844e+07
F D C Ltd.	2018	-0.0013812	12532.2	30613.6	118.942	1.25844e+07
Federal Bank Ltd.	2018	-0.000589994	1.08749e+06	30613.6	118.942	1.25844e+07
Finolex Cables Ltd.	2018	-0.00172426	10447.2	30613.6	118.942	1.25844e+07
Finolex Industries Ltd.	2018	-0.000729743	24547.4	30613.6	118.942	1.25844e+07
Firstsource Solutions Ltd.	2018	0.000612899	1.12121e+06	30613.6	118.942	1.25844e+07
Fortis Healthcare Ltd.	2018	-0.000400841	913945	30613.6	118.942	1.25844e+07
G A I L (India) Ltd.	2018	-0.000113438	224824	30613.6	118.942	1.25844e+07
G M M Pfaudler Ltd.	2018	0.00150037	2679.29	30613.6	118.942	1.25844e+07
Garware Technical Fibres Ltd.	2018	0.00115508	2980.11	30613.6	118.942	1.25844e+07
General Insurance Corpn. Of India	2018	-0.00157797	20548.8	30613.6	118.942	1.25844e+07
Glaxosmithkline Pharmaceuticals Ltd.	2018	0.00084216	2949.54	30613.6	118.942	1.25844e+07
Glenmark Pharmaceuticals Ltd.	2018	0.000630448	72628.6	30613.6	118.942	1.25844e+07
Godfrey Phillips India Ltd.	2018	-0.000435516	12923.8	30613.6	118.942	1.25844e+07
Godrej Agrovet Ltd.	2018	-0.000718554	26652.8	30613.6	118.942	1.25844e+07
Godrej Consumer Products Ltd.	2018	0.000891443	61177.9	30613.6	118.942	1.25844e+07
Godrej Industries Ltd.	2018	-0.000380905	38635.5	30613.6	118.942	1.25844e+07
Godrej Properties Ltd.	2018	-0.000325834	42827	30613.6	118.942	1.25844e+07
Granules India Ltd.	2018	-0.00164294	266414	30613.6	118.942	1.25844e+07
Graphite India Ltd.	2018	-0.000163782	215936	30613.6	118.942	1.25844e+07
Grasim Industries Ltd.	2018	-0.00129649	99099.2	30613.6	118.942	1.25844e+07
Great Eastern Shipping Co. Ltd.	2018	-0.00095499	13896.9	30613.6	118.942	1.25844e+07
Grindwell Norton Ltd.	2018	0.000118487	14739.6	30613.6	118.942	1.25844e+07
Gujarat Alkalies & Chemicals Ltd.	2018	-0.00124052	21845	30613.6	118.942	1.25844e+07
Gujarat Gas Ltd.	2018	-0.000945001	163119	30613.6	118.942	1.25844e+07
Gujarat Narmada Valley Fertilizers & Chemicals Ltd.	2018	-0.00139258	170891	30613.6	118.942	1.25844e+07
Gujarat Pipavav Port Ltd.	2018	-0.00123207	79889.8	30613.6	118.942	1.25844e+07
Gujarat State Fertilizers & Chemicals Ltd.	2018	-0.000951986	290849	30613.6	118.942	1.25844e+07
Gujarat State Petronet Ltd.	2018	-0.000986971	62594.7	30613.6	118.942	1.25844e+07
H C L Technologies Ltd.	2018	0.000310756	152569	30613.6	118.942	1.25844e+07
H D F C Bank Ltd.	2018	0.000508883	127713	30613.6	118.942	1.25844e+07
H D F C Life Insurance Co. Ltd.	2018	-7.89454e-05	160979	30613.6	118.942	1.25844e+07
H E G Ltd.	2018	0.00151955	59501.2	30613.6	118.942	1.25844e+07
H F C L Ltd.	2018	-0.00169905	1.46116e+06	30613.6	118.942	1.25844e+07
Hathway Cable & Datacom Ltd.	2018	-0.000978922	579111	30613.6	118.942	1.25844e+07
Hatsun Agro Products Ltd.	2018	-0.00108299	4360.36	30613.6	118.942	1.25844e+07
Havells India Ltd.	2018	0.000938328	179425	30613.6	118.942	1.25844e+07
Hero Motocorp Ltd.	2018	-0.000763563	28668.5	30613.6	118.942	1.25844e+07
Hikal Ltd.	2018	-7.28978e-05	60550.3	30613.6	118.942	1.25844e+07
Hindalco Industries Ltd.	2018	-0.000752067	638167	30613.6	118.942	1.25844e+07
Hindustan Copper Ltd.	2018	-0.00251821	388594	30613.6	118.942	1.25844e+07
Hindustan Petroleum Corpn. Ltd.	2018	-0.0019231	529168	30613.6	118.942	1.25844e+07
Hindustan Unilever Ltd.	2018	0.00124189	103759	30613.6	118.942	1.25844e+07
Hindustan Zinc Ltd.	2018	-0.000444505	183205	30613.6	118.942	1.25844e+07
Honeywell Automation India Ltd.	2018	0.000602998	329.435	30613.6	118.942	1.25844e+07
Housing & Urban Devp. Corpn. Ltd.	2018	-0.00262135	282946	30613.6	118.942	1.25844e+07
Housing Development Finance Corpn. Ltd.	2018	0.000594309	219992	30613.6	118.942	1.25844e+07
I C I C I Bank Ltd.	2018	0.000617699	1.38436e+06	30613.6	118.942	1.25844e+07
I C I C I Lombard General Insurance Co. Ltd.	2018	0.000323127	102163	30613.6	118.942	1.25844e+07
I C I C I Prudential Life Insurance Co. Ltd.	2018	-0.000593324	95638.6	30613.6	118.942	1.25844e+07
I D B I Bank Ltd.	2018	0.00012799	2.47997e+06	30613.6	118.942	1.25844e+07
I D F C First Bank Ltd.	2018	-0.000888311	988335	30613.6	118.942	1.25844e+07
I D F C Ltd.	2018	-0.00138764	566804	30613.6	118.942	1.25844e+07
I F B Industries Ltd.	2018	-0.00182035	2558.85	30613.6	118.942	1.25844e+07
I I F L Finance Ltd.	2018	-0.00104093	25351.2	30613.6	118.942	1.25844e+07
I R B Infrastructure Developers Ltd.	2018	-0.00136529	165142	30613.6	118.942	1.25844e+07
I T C Ltd.	2018	0.00031031	780986	30613.6	118.942	1.25844e+07
I T I Ltd.	2018	-0.00177684	193839	30613.6	118.942	1.25844e+07
India Cements Ltd.	2018	-0.00256124	447131	30613.6	118.942	1.25844e+07
Indiabulls Housing Finance Ltd.	2018	-0.00133001	393917	30613.6	118.942	1.25844e+07
Indiabulls Real Estate Ltd.	2018	-0.00367976	879236	30613.6	118.942	1.25844e+07
Indian Bank	2018	-0.00175627	119073	30613.6	118.942	1.25844e+07
Indian Energy Exchange Ltd.	2018	0.000148919	21849.6	30613.6	118.942	1.25844e+07
Indian Hotels Co. Ltd.	2018	0.000885216	481251	30613.6	118.942	1.25844e+07
Indian Oil Corpn. Ltd.	2018	-0.00139479	878632	30613.6	118.942	1.25844e+07
Indian Overseas Bank	2018	-0.00164914	81061.6	30613.6	118.942	1.25844e+07
Indoco Remedies Ltd.	2018	-0.00104715	40155.5	30613.6	118.942	1.25844e+07
Indraprastha Gas Ltd.	2018	-0.000924246	147143	30613.6	118.942	1.25844e+07
Indus Towers Ltd.	2018	-0.00152505	185636	30613.6	118.942	1.25844e+07
Indusind Bank Ltd.	2018	-0.000111828	66739.2	30613.6	118.942	1.25844e+07
Infibeam Avenues Ltd.	2018	-0.00449325	1.56126e+06	30613.6	118.942	1.25844e+07
Info Edge (India) Ltd.	2018	0.000276588	14556.9	30613.6	118.942	1.25844e+07
Infosys Ltd.	2018	0.00100948	399766	30613.6	118.942	1.25844e+07
Inox Leisure Ltd.	2018	-0.000545486	47488.7	30613.6	118.942	1.25844e+07
Intellect Design Arena Ltd.	2018	0.00135139	125430	30613.6	118.942	1.25844e+07
Interglobe Aviation Ltd.	2018	-0.00012803	78121.9	30613.6	118.942	1.25844e+07
Ipca Laboratories Ltd.	2018	0.00125758	29936.3	30613.6	118.942	1.25844e+07
J B Chemicals & Pharmaceuticals Ltd.	2018	-0.000290667	10570.4	30613.6	118.942	1.25844e+07
J K Cement Ltd.	2018	-0.00181059	8782.33	30613.6	118.942	1.25844e+07
J K Lakshmi Cement Ltd.	2018	-0.00164961	14879	30613.6	118.942	1.25844e+07
J K Paper Ltd.	2018	0.000425472	140719	30613.6	118.942	1.25844e+07
J M Financial Ltd.	2018	-0.00206303	157431	30613.6	118.942	1.25844e+07
J S W Energy Ltd.	2018	-0.00108216	319102	30613.6	118.942	1.25844e+07
J S W Steel Ltd.	2018	0.000597312	324105	30613.6	118.942	1.25844e+07
Jamna Auto Inds. Ltd.	2018	-0.00093082	243465	30613.6	118.942	1.25844e+07
Jindal Stainless (Hisar) Ltd.	2018	-0.00352892	156921	30613.6	118.942	1.25844e+07
Jindal Stainless Ltd.	2018	-0.00462686	105276	30613.6	118.942	1.25844e+07
Jindal Steel & Power Ltd.	2018	-0.000853689	1.09732e+06	30613.6	118.942	1.25844e+07
Jubilant Foodworks Ltd.	2018	0.00135619	90817.3	30613.6	118.942	1.25844e+07
Jubilant Pharmova Ltd.	2018	-0.000281852	77539.2	30613.6	118.942	1.25844e+07
Just Dial Ltd.	2018	-0.000122902	364712	30613.6	118.942	1.25844e+07
Jyothy Labs Ltd.	2018	0.000485096	42557.4	30613.6	118.942	1.25844e+07
K E C International Ltd.	2018	-0.000955354	76074.7	30613.6	118.942	1.25844e+07
K N R Constructions Ltd.	2018	-0.00150102	26247.2	30613.6	118.942	1.25844e+07
K P R Mill Ltd.	2018	-0.00151037	6298.51	30613.6	118.942	1.25844e+07
K R B L Ltd.	2018	-0.00305766	50097.6	30613.6	118.942	1.25844e+07
Kajaria Ceramics Ltd.	2018	-0.00150967	45523.7	30613.6	118.942	1.25844e+07
Kalpataru Power Transmission Ltd.	2018	-0.000783398	18050.6	30613.6	118.942	1.25844e+07
Kansai Nerolac Paints Ltd.	2018	-0.000554063	17888.6	30613.6	118.942	1.25844e+07
Kei Industries Ltd.	2018	-0.000156666	33633.5	30613.6	118.942	1.25844e+07
Kotak Mahindra Bank Ltd.	2018	0.00091195	156398	30613.6	118.942	1.25844e+07
L & T Finance Holdings Ltd.	2018	-0.000441475	707960	30613.6	118.942	1.25844e+07
L & T Technology Services Ltd.	2018	0.00180077	15977.7	30613.6	118.942	1.25844e+07
L I C Housing Finance Ltd.	2018	-0.000574465	124553	30613.6	118.942	1.25844e+07
Lakshmi Machine Works Ltd.	2018	-5.18031e-05	4317.31	30613.6	118.942	1.25844e+07
Larsen & Toubro Infotech Ltd.	2018	0.0016572	26974.1	30613.6	118.942	1.25844e+07
Larsen & Toubro Ltd.	2018	0.000573893	203201	30613.6	118.942	1.25844e+07
Laurus Labs Ltd.	2018	-0.00139156	24426.4	30613.6	118.942	1.25844e+07
Linde India Ltd.	2018	0.00109147	12385.5	30613.6	118.942	1.25844e+07
Lupin Ltd.	2018	-0.000142183	182708	30613.6	118.942	1.25844e+07
Lux Industries Ltd.	2018	-0.000339903	4288.87	30613.6	118.942	1.25844e+07
M M T C Ltd.	2018	-0.00173015	328722	30613.6	118.942	1.25844e+07
M O I L Ltd.	2018	-0.00134661	40741.2	30613.6	118.942	1.25844e+07
M R F Ltd.	2018	-0.000243086	614.756	30613.6	118.942	1.25844e+07
Mahanagar Gas Ltd.	2018	-0.000766207	51527.8	30613.6	118.942	1.25844e+07
Mahindra & Mahindra Financial Services Ltd.	2018	9.69542e-05	144497	30613.6	118.942	1.25844e+07
Mahindra & Mahindra Ltd.	2018	0.000267582	174074	30613.6	118.942	1.25844e+07
Mahindra C I E Automotive Ltd.	2018	7.29714e-05	75673.8	30613.6	118.942	1.25844e+07
Mahindra Holidays & Resorts India Ltd.	2018	-0.00184938	23059	30613.6	118.942	1.25844e+07
Mahindra Logistics Ltd.	2018	0.000605597	17638.5	30613.6	118.942	1.25844e+07
Manappuram Finance Ltd.	2018	-0.00101552	329547	30613.6	118.942	1.25844e+07
Mangalore Refinery & Petrochemicals Ltd.	2018	-0.00204258	182976	30613.6	118.942	1.25844e+07
Marico Ltd.	2018	0.000581377	152277	30613.6	118.942	1.25844e+07
Maruti Suzuki India Ltd.	2018	-0.00100069	51681.1	30613.6	118.942	1.25844e+07
Mastek Ltd.	2018	0.000801387	50119	30613.6	118.942	1.25844e+07
Max Financial Services Ltd.	2018	-0.00110444	81971.1	30613.6	118.942	1.25844e+07
Minda Industries Ltd.	2018	-0.00109938	16493.4	30613.6	118.942	1.25844e+07
Mindtree Ltd.	2018	0.00145155	89074	30613.6	118.942	1.25844e+07
Motilal Oswal Financial Services Ltd.	2018	-0.00309331	12715.2	30613.6	118.942	1.25844e+07
Mphasis Ltd.	2018	0.00131757	31230.4	30613.6	118.942	1.25844e+07
Multi Commodity Exchange Of India Ltd.	2018	-0.000861587	64599	30613.6	118.942	1.25844e+07
Muthoot Finance Ltd.	2018	0.000481449	71268.8	30613.6	118.942	1.25844e+07
N B C C (India) Ltd.	2018	-0.00303542	473602	30613.6	118.942	1.25844e+07
N C C Ltd.	2018	-0.0015956	753200	30613.6	118.942	1.25844e+07
N H P C Ltd.	2018	-0.000824963	380039	30613.6	118.942	1.25844e+07
N L C India Ltd.	2018	-0.00181312	57172.1	30613.6	118.942	1.25844e+07
N M D C Ltd.	2018	-0.00173393	264217	30613.6	118.942	1.25844e+07
N T P C Ltd.	2018	-0.000749777	448657	30613.6	118.942	1.25844e+07
Narayana Hrudayalaya Ltd.	2018	-0.00172273	17619.4	30613.6	118.942	1.25844e+07
Natco Pharma Ltd.	2018	-0.00142907	24044.8	30613.6	118.942	1.25844e+07
National Aluminium Co. Ltd.	2018	-0.00106533	1.02473e+06	30613.6	118.942	1.25844e+07
Navin Fluorine Intl. Ltd.	2018	-0.000606222	14908.3	30613.6	118.942	1.25844e+07
Nesco Ltd.	2018	-0.000772052	6781.92	30613.6	118.942	1.25844e+07
Nestle India Ltd.	2018	0.00140597	6304.89	30613.6	118.942	1.25844e+07
Network18 Media & Invst. Ltd.	2018	-0.00148754	196078	30613.6	118.942	1.25844e+07
New India Assurance Co. Ltd.	2018	-0.00212559	5627.54	30613.6	118.942	1.25844e+07
Nippon Life India Asset Mgmt. Ltd.	2018	-0.00239986	27162.9	30613.6	118.942	1.25844e+07
Nocil Ltd.	2018	-0.000370551	191796	30613.6	118.942	1.25844e+07
Oberoi Realty Ltd.	2018	-0.000322356	41954.8	30613.6	118.942	1.25844e+07
Oil & Natural Gas Corpn. Ltd.	2018	-0.00110155	512535	30613.6	118.942	1.25844e+07
Oil India Ltd.	2018	-0.0014217	55662.9	30613.6	118.942	1.25844e+07
Oracle Financial Services Software Ltd.	2018	-0.000295207	11224.2	30613.6	118.942	1.25844e+07
P C B L Ltd.	2018	6.50547e-05	138812	30613.6	118.942	1.25844e+07
P I Industries Ltd.	2018	-0.000390823	22463.5	30613.6	118.942	1.25844e+07
P N B Housing Finance Ltd.	2018	-0.00143149	55757.4	30613.6	118.942	1.25844e+07
P N C Infratech Ltd.	2018	-0.00142349	32731.9	30613.6	118.942	1.25844e+07
P V R Ltd.	2018	0.000539699	28082.5	30613.6	118.942	1.25844e+07
Page Industries Ltd.	2018	0.000119425	1634.63	30613.6	118.942	1.25844e+07
Persistent Systems Ltd.	2018	-0.000504127	18516.5	30613.6	118.942	1.25844e+07
Petronet L N G Ltd.	2018	-0.000502369	183359	30613.6	118.942	1.25844e+07
Pfizer Ltd.	2018	0.00135115	4158.35	30613.6	118.942	1.25844e+07
Phoenix Mills Ltd.	2018	-0.000492656	19645.1	30613.6	118.942	1.25844e+07
Pidilite Industries Ltd.	2018	0.000894306	39791.7	30613.6	118.942	1.25844e+07
Piramal Enterprises Ltd.	2018	-0.000698392	54565.1	30613.6	118.942	1.25844e+07
Poly Medicure Ltd.	2018	-0.000958018	5182.76	30613.6	118.942	1.25844e+07
Poonawalla Fincorp Ltd.	2018	-0.00158337	195928	30613.6	118.942	1.25844e+07
Power Finance Corpn. Ltd.	2018	-0.000582723	740526	30613.6	118.942	1.25844e+07
Power Grid Corpn. Of India Ltd.	2018	-3.14721e-05	829800	30613.6	118.942	1.25844e+07
Praj Industries Ltd.	2018	1.67401e-05	207841	30613.6	118.942	1.25844e+07
Prestige Estates Projects Ltd.	2018	-0.00156176	51927.3	30613.6	118.942	1.25844e+07
Prism Johnson Ltd.	2018	-0.00106406	161053	30613.6	118.942	1.25844e+07
Procter & Gamble Health Ltd.	2018	0.00348914	7321.68	30613.6	118.942	1.25844e+07
Procter & Gamble Hygiene & Health Care Ltd.	2018	0.00019625	1626.38	30613.6	118.942	1.25844e+07
Punjab National Bank	2018	-0.00307604	2.5306e+06	30613.6	118.942	1.25844e+07
Quess Corp Ltd.	2018	-0.00236584	17182	30613.6	118.942	1.25844e+07
R B L Bank Ltd.	2018	0.000480954	155342	30613.6	118.942	1.25844e+07
R E C Ltd.	2018	-0.00104559	511590	30613.6	118.942	1.25844e+07
R H I Magnesita India Ltd.	2018	0.00141934	26625.2	30613.6	118.942	1.25844e+07
Radico Khaitan Ltd.	2018	0.00127952	171583	30613.6	118.942	1.25844e+07
Rain Industries Ltd.	2018	-0.00443856	321201	30613.6	118.942	1.25844e+07
Rajesh Exports Ltd.	2018	-0.00145267	51937.7	30613.6	118.942	1.25844e+07
Rallis India Ltd.	2018	-0.0016094	34245.3	30613.6	118.942	1.25844e+07
Ramco Cements Ltd.	2018	-0.000767445	31887.5	30613.6	118.942	1.25844e+07
Rashtriya Chemicals & Fertilizers Ltd.	2018	-0.00163015	471262	30613.6	118.942	1.25844e+07
Ratnamani Metals & Tubes Ltd.	2018	-0.000692068	1462.94	30613.6	118.942	1.25844e+07
Redington (India) Ltd.	2018	-0.00300703	57302.5	30613.6	118.942	1.25844e+07
Relaxo Footwears Ltd.	2018	0.000368639	5532.71	30613.6	118.942	1.25844e+07
Reliance Industries Ltd.	2018	0.000841608	567252	30613.6	118.942	1.25844e+07
S B I Life Insurance Co. Ltd.	2018	-0.000564477	47651.2	30613.6	118.942	1.25844e+07
S I S Ltd.	2018	-0.00142128	12118.4	30613.6	118.942	1.25844e+07
S J V N Ltd.	2018	-0.00114156	102905	30613.6	118.942	1.25844e+07
S K F India Ltd.	2018	0.0001208	4680.17	30613.6	118.942	1.25844e+07
S R F Ltd.	2018	0.000105185	16904.7	30613.6	118.942	1.25844e+07
Sanofi India Ltd.	2018	0.0012301	1670.91	30613.6	118.942	1.25844e+07
Saregama India Ltd.	2018	-0.00113938	15042.6	30613.6	118.942	1.25844e+07
Schaeffler India Ltd.	2018	-5.41008e-05	1705.67	30613.6	118.942	1.25844e+07
Sequent Scientific Ltd.	2018	-0.00151561	103307	30613.6	118.942	1.25844e+07
Sheela Foam Ltd.	2018	-0.000571377	2860.99	30613.6	118.942	1.25844e+07
Shilpa Medicare Ltd.	2018	-0.00189912	4255.5	30613.6	118.942	1.25844e+07
Shipping Corpn. Of India Ltd.	2018	-0.00270858	145208	30613.6	118.942	1.25844e+07
Shree Cement Ltd.	2018	-0.000170682	1227.57	30613.6	118.942	1.25844e+07
Shriram City Union Finance Ltd.	2018	-0.00101433	5239.9	30613.6	118.942	1.25844e+07
Shriram Transport Finance Co. Ltd.	2018	-0.000658967	69343.2	30613.6	118.942	1.25844e+07
Siemens Ltd.	2018	-0.000750418	20574.9	30613.6	118.942	1.25844e+07
Sobha Ltd.	2018	-0.00106721	37288.6	30613.6	118.942	1.25844e+07
Solar Industries India Ltd.	2018	-0.000300918	5711.37	30613.6	118.942	1.25844e+07
Sonata Software Ltd.	2018	0.000433055	46383.6	30613.6	118.942	1.25844e+07
State Bank Of India	2018	-9.84813e-05	1.64731e+06	30613.6	118.942	1.25844e+07
Steel Authority Of India Ltd.	2018	-0.00197665	1.14311e+06	30613.6	118.942	1.25844e+07
Sterlite Technologies Ltd.	2018	3.33886e-05	263879	30613.6	118.942	1.25844e+07
Strides Pharma Science Ltd.	2018	-0.00232574	198521	30613.6	118.942	1.25844e+07
Sudarshan Chemical Inds. Ltd.	2018	-0.000569102	39924.8	30613.6	118.942	1.25844e+07
Sun Pharma Advanced Research Co. Ltd.	2018	-0.00390547	62131.3	30613.6	118.942	1.25844e+07
Sun Pharmaceutical Inds. Ltd.	2018	-0.00115028	641411	30613.6	118.942	1.25844e+07
Sun T V Network Ltd.	2018	-0.00200053	89451.3	30613.6	118.942	1.25844e+07
Sundram Fasteners Ltd.	2018	-0.000281694	15793.9	30613.6	118.942	1.25844e+07
Sunteck Realty Ltd.	2018	-0.000797078	94741.4	30613.6	118.942	1.25844e+07
Supreme Industries Ltd.	2018	-0.000419906	12849.9	30613.6	118.942	1.25844e+07
Supreme Petrochem Ltd.	2018	-0.00249029	6228.85	30613.6	118.942	1.25844e+07
Suzlon Energy Ltd.	2018	-0.00436209	3.92535e+06	30613.6	118.942	1.25844e+07
Symphony Ltd.	2018	-0.00153538	5369.22	30613.6	118.942	1.25844e+07
Syngene International Ltd.	2018	8.26744e-06	32316.6	30613.6	118.942	1.25844e+07
T C I Express Ltd.	2018	0.000393898	2279.57	30613.6	118.942	1.25844e+07
T T K Prestige Ltd.	2018	-0.000187944	851.366	30613.6	118.942	1.25844e+07
T V S Motor Co. Ltd.	2018	-0.00124349	124256	30613.6	118.942	1.25844e+07
Tanla Platforms Ltd.	2018	-0.000945494	76218.9	30613.6	118.942	1.25844e+07
Tata Chemicals Ltd.	2018	-0.000113448	61597.7	30613.6	118.942	1.25844e+07
Tata Coffee Ltd.	2018	-0.00216391	71576.8	30613.6	118.942	1.25844e+07
Tata Communications Ltd.	2018	-0.00100808	47391	30613.6	118.942	1.25844e+07
Tata Consultancy Services Ltd.	2018	0.00147637	188534	30613.6	118.942	1.25844e+07
Tata Consumer Products Ltd.	2018	-0.00141958	244847	30613.6	118.942	1.25844e+07
Tata Elxsi Ltd.	2018	0.000181622	59923.4	30613.6	118.942	1.25844e+07
Tata Investment Corpn. Ltd.	2018	-2.05265e-06	7146.32	30613.6	118.942	1.25844e+07
Tata Motors Ltd.	2018	-0.00379342	1.08599e+06	30613.6	118.942	1.25844e+07
Tata Power Co. Ltd.	2018	-0.00105326	530433	30613.6	118.942	1.25844e+07
Tata Steel Ltd.	2018	-0.00129666	632350	30613.6	118.942	1.25844e+07
Tata Teleservices (Maharashtra) Ltd.	2018	-0.00238938	249124	30613.6	118.942	1.25844e+07
Teamlease Services Ltd.	2018	0.000816161	4435.6	30613.6	118.942	1.25844e+07
Tech Mahindra Ltd.	2018	0.00138931	198555	30613.6	118.942	1.25844e+07
Thermax Ltd.	2018	-0.000365154	7378.6	30613.6	118.942	1.25844e+07
Thyrocare Technologies Ltd.	2018	-0.00106032	14220.5	30613.6	118.942	1.25844e+07
Timken India Ltd.	2018	-0.00166925	4526.68	30613.6	118.942	1.25844e+07
Titan Company Ltd.	2018	0.000387483	155600	30613.6	118.942	1.25844e+07
Torrent Pharmaceuticals Ltd.	2018	0.000968802	21139.7	30613.6	118.942	1.25844e+07
Torrent Power Ltd.	2018	-0.000247127	105596	30613.6	118.942	1.25844e+07
Trent Ltd.	2018	0.000402762	22739.7	30613.6	118.942	1.25844e+07
Trident Ltd.	2018	-0.00114188	138740	30613.6	118.942	1.25844e+07
Triveni Turbine Ltd.	2018	-0.000639199	81974.1	30613.6	118.942	1.25844e+07
Tube Investments Of India Ltd.	2018	0.00114166	43147.7	30613.6	118.942	1.25844e+07
Tv18 Broadcast Ltd.	2018	-0.00184411	671240	30613.6	118.942	1.25844e+07
U P L Ltd.	2018	-7.76519e-05	150986	30613.6	118.942	1.25844e+07
Uco Bank	2018	-0.00164489	102962	30613.6	118.942	1.25844e+07
Uflex Ltd.	2018	-0.00215783	24582.1	30613.6	118.942	1.25844e+07
Ultratech Cement Ltd.	2018	-0.000248526	15127.1	30613.6	118.942	1.25844e+07
Union Bank Of India	2018	-0.00204988	702685	30613.6	118.942	1.25844e+07
United Breweries Ltd.	2018	0.00118981	45044.4	30613.6	118.942	1.25844e+07
V I P Industries Ltd.	2018	0.00160681	81947.3	30613.6	118.942	1.25844e+07
V-Guard Industries Ltd.	2018	-0.000142678	77235.3	30613.6	118.942	1.25844e+07
V-Mart Retail Ltd.	2018	0.00226366	4428.87	30613.6	118.942	1.25844e+07
Vaibhav Global Ltd.	2018	1.92603e-05	408.049	30613.6	118.942	1.25844e+07
Vakrangee Ltd.	2018	-0.0102927	408.049	30613.6	118.942	1.25844e+07
Vardhman Textiles Ltd.	2018	-0.000994196	408.049	30613.6	118.942	1.25844e+07
Varun Beverages Ltd.	2018	0.00044571	408.049	30613.6	118.942	1.25844e+07
Vedanta Ltd.	2018	-0.00195727	408.049	30613.6	118.942	1.25844e+07
Venky'S (India) Ltd.	2018	-0.000606131	408.049	30613.6	118.942	1.25844e+07
Vinati Organics Ltd.	2018	0.00208136	4428.87	30613.6	118.942	1.25844e+07
Vodafone Idea Ltd.	2018	-0.0039958	1.87514e+06	30613.6	118.942	1.25844e+07
Voltas Ltd.	2018	-0.000644407	93791.8	30613.6	118.942	1.25844e+07
Wabco India Ltd.	2018	-0.000174571	483.215	30613.6	118.942	1.25844e+07
Welspun Corp Ltd.	2018	9.31813e-05	253319	30613.6	118.942	1.25844e+07
Welspun India Ltd.	2018	-0.000738874	349765	30613.6	118.942	1.25844e+07
Whirlpool Of India Ltd.	2018	-0.000568924	6563.8	30613.6	118.942	1.25844e+07
Wipro Ltd.	2018	0.00014229	337624	30613.6	118.942	1.25844e+07
Wockhardt Ltd.	2018	-0.00220565	173754	30613.6	118.942	1.25844e+07
Yes Bank Ltd.	2018	-0.00219207	2.21417e+06	30613.6	118.942	1.25844e+07
Zee Entertainment Enterprises Ltd.	2018	-0.00079533	328912	30613.6	118.942	1.25844e+07
Zensar Technologies Ltd.	2018	0.00123506	21303.4	30613.6	118.942	1.25844e+07
Zydus Wellness Ltd.	2018	0.0011792	2383.38	30613.6	118.942	1.25844e+07

## Sheet: 2019 BSE
Company_Name	YEAR	Adjusted_Return	Adjusted_Share Traded	Gold_Price	WPI_INDEX	GDP_YEAR
3M India Ltd.	2019	0.000236837	240.348	34862.5	121.183	1.31079e+07
A B B India Ltd.	2019	-0.000100158	13968.2	34862.5	121.183	1.31079e+07
A C C Ltd.	2019	-0.000107352	46848	34862.5	121.183	1.31079e+07
A I A Engineering Ltd.	2019	-8.89568e-06	1667.33	34862.5	121.183	1.31079e+07
A P L Apollo Tubes Ltd.	2019	0.00180759	2102.35	34862.5	121.183	1.31079e+07
A U Small Finance Bank Ltd.	2019	0.0010729	48701.9	34862.5	121.183	1.31079e+07
Aarti Drugs Ltd.	2019	7.62421e-06	1749.44	34862.5	121.183	1.31079e+07
Aarti Industries Ltd.	2019	0.000567945	9397.74	34862.5	121.183	1.31079e+07
Abbott India Ltd.	2019	0.00225031	895.498	34862.5	121.183	1.31079e+07
Adani Enterprises Ltd.	2019	0.00120607	636918	34862.5	121.183	1.31079e+07
Adani Ports & Special Economic Zone Ltd.	2019	-0.000163965	349111	34862.5	121.183	1.31079e+07
Adani Transmission Ltd.	2019	0.0020715	32678.3	34862.5	121.183	1.31079e+07
Aditya Birla Capital Ltd.	2019	0.000131254	354800	34862.5	121.183	1.31079e+07
Aditya Birla Fashion & Retail Ltd.	2019	0.000691918	79076.1	34862.5	121.183	1.31079e+07
Advanced Enzyme Technologies Ltd.	2019	-0.000249118	49646.8	34862.5	121.183	1.31079e+07
Aegis Logistics Ltd.	2019	-0.000205667	9462.31	34862.5	121.183	1.31079e+07
Ajanta Pharma Ltd.	2019	-0.000715212	17534.7	34862.5	121.183	1.31079e+07
Alembic Pharmaceuticals Ltd.	2019	-6.87196e-05	4688.47	34862.5	121.183	1.31079e+07
Alkem Laboratories Ltd.	2019	0.000121803	4862.7	34862.5	121.183	1.31079e+07
Alkyl Amines Chemicals Ltd.	2019	0.00124441	1247.27	34862.5	121.183	1.31079e+07
Allcargo Logistics Ltd.	2019	-0.000438838	12401.5	34862.5	121.183	1.31079e+07
Alok Industries Ltd.	2019	-0.00118092	1.5356e+06	34862.5	121.183	1.31079e+07
Amara Raja Batteries Ltd.	2019	-4.56585e-05	29558.2	34862.5	121.183	1.31079e+07
Ambuja Cements Ltd.	2019	-0.000448507	130773	34862.5	121.183	1.31079e+07
Apollo Hospitals Enterprise Ltd.	2019	0.00054537	56671.1	34862.5	121.183	1.31079e+07
Apollo Tyres Ltd.	2019	-0.0013888	190074	34862.5	121.183	1.31079e+07
Asahi India Glass Ltd.	2019	-0.00104556	3368.76	34862.5	121.183	1.31079e+07
Ashok Leyland Ltd.	2019	-0.000837008	1.81357e+06	34862.5	121.183	1.31079e+07
Asian Paints Ltd.	2019	0.00104999	71698.7	34862.5	121.183	1.31079e+07
Astral Ltd.	2019	0.00103871	30796.6	34862.5	121.183	1.31079e+07
Astrazeneca Pharma India Ltd.	2019	0.00249735	1801	34862.5	121.183	1.31079e+07
Atul Ltd.	2019	0.000655301	2712.6	34862.5	121.183	1.31079e+07
Aurobindo Pharma Ltd.	2019	-0.00186661	161131	34862.5	121.183	1.31079e+07
Avanti Feeds Ltd.	2019	0.00177364	48543.4	34862.5	121.183	1.31079e+07
Avenue Supermarts Ltd.	2019	0.000663134	74848.5	34862.5	121.183	1.31079e+07
Axis Bank Ltd.	2019	0.000805913	444282	34862.5	121.183	1.31079e+07
B A S F India Ltd.	2019	-0.00181509	2525.62	34862.5	121.183	1.31079e+07
B E M L Ltd.	2019	0.000260878	84808.6	34862.5	121.183	1.31079e+07
Bajaj Auto Ltd.	2019	0.000690984	29376.2	34862.5	121.183	1.31079e+07
Bajaj Electricals Ltd.	2019	-0.00142007	19855.7	34862.5	121.183	1.31079e+07
Bajaj Finance Ltd.	2019	0.00196559	109058	34862.5	121.183	1.31079e+07
Bajaj Finserv Ltd.	2019	0.00156996	15995.8	34862.5	121.183	1.31079e+07
Bajaj Holdings & Invst. Ltd.	2019	0.000592355	10591.1	34862.5	121.183	1.31079e+07
Balaji Amines Ltd.	2019	-0.000519964	4633.14	34862.5	121.183	1.31079e+07
Balkrishna Industries Ltd.	2019	0.000337549	37450.9	34862.5	121.183	1.31079e+07
Balrampur Chini Mills Ltd.	2019	0.00229473	152215	34862.5	121.183	1.31079e+07
Bank Of Baroda	2019	-0.000646887	1.45127e+06	34862.5	121.183	1.31079e+07
Bank Of India	2019	-0.00161907	896716	34862.5	121.183	1.31079e+07
Bank Of Maharashtra	2019	-0.000754131	120759	34862.5	121.183	1.31079e+07
Bata India Ltd.	2019	0.00184807	42692.7	34862.5	121.183	1.31079e+07
Bayer Cropscience Ltd.	2019	-0.000667345	1364.8	34862.5	121.183	1.31079e+07
Berger Paints India Ltd.	2019	0.00185475	90746.7	34862.5	121.183	1.31079e+07
Bharat Electronics Ltd.	2019	0.000450026	619664	34862.5	121.183	1.31079e+07
Bharat Forge Ltd.	2019	-9.80356e-05	75854.9	34862.5	121.183	1.31079e+07
Bharat Heavy Electricals Ltd.	2019	-0.00210935	1.41059e+06	34862.5	121.183	1.31079e+07
Bharat Petroleum Corpn. Ltd.	2019	0.0012896	319893	34862.5	121.183	1.31079e+07
Bharti Airtel Ltd.	2019	0.00188598	521174	34862.5	121.183	1.31079e+07
Biocon Ltd.	2019	-0.000235814	221680	34862.5	121.183	1.31079e+07
Birla Corporation Ltd.	2019	0.000151265	9219.07	34862.5	121.183	1.31079e+07
Birlasoft Ltd.	2019	-0.00455373	183510	34862.5	121.183	1.31079e+07
Blue Dart Express Ltd.	2019	-0.00173539	384.131	34862.5	121.183	1.31079e+07
Blue Star Ltd.	2019	0.00122947	6796.59	34862.5	121.183	1.31079e+07
Bombay Burmah Trdg. Corpn. Ltd.	2019	-0.000935645	25867.9	34862.5	121.183	1.31079e+07
Bosch Ltd.	2019	-0.000958588	1091.55	34862.5	121.183	1.31079e+07
Brigade Enterprises Ltd.	2019	0.00171536	11756.4	34862.5	121.183	1.31079e+07
Brightcom Group Ltd.	2019	0.00373363	455394	34862.5	121.183	1.31079e+07
Britannia Industries Ltd.	2019	-0.000117744	21666	34862.5	121.183	1.31079e+07
C C L Products (India) Ltd.	2019	-0.00118055	8142.94	34862.5	121.183	1.31079e+07
C E S C Ltd.	2019	0.000408999	15488.4	34862.5	121.183	1.31079e+07
Cadila Healthcare Ltd.	2019	-0.00126433	84914.5	34862.5	121.183	1.31079e+07
Can Fin Homes Ltd.	2019	0.00137118	63025	34862.5	121.183	1.31079e+07
Canara Bank	2019	-0.000892675	367350	34862.5	121.183	1.31079e+07
Caplin Point Laboratories Ltd.	2019	-0.000955027	5387.53	34862.5	121.183	1.31079e+07
Carborundum Universal Ltd.	2019	-0.000480181	15326.3	34862.5	121.183	1.31079e+07
Castrol India Ltd.	2019	-0.000530406	114874	34862.5	121.183	1.31079e+07
Ceat Ltd.	2019	-0.00108295	31863.7	34862.5	121.183	1.31079e+07
Central Bank Of India	2019	-0.00297476	91561.8	34862.5	121.183	1.31079e+07
Century Plyboards (India) Ltd.	2019	-0.000345407	14684	34862.5	121.183	1.31079e+07
Century Textiles & Inds. Ltd.	2019	-0.00261785	50914.2	34862.5	121.183	1.31079e+07
Cera Sanitaryware Ltd.	2019	0.000515938	828.033	34862.5	121.183	1.31079e+07
Chambal Fertilisers & Chemicals Ltd.	2019	-5.73104e-05	34026.7	34862.5	121.183	1.31079e+07
Cholamandalam Financial Holdings Ltd.	2019	-8.61033e-05	19628.4	34862.5	121.183	1.31079e+07
Cholamandalam Investment & Finance Co. Ltd.	2019	0.00087572	72603.6	34862.5	121.183	1.31079e+07
Cipla Ltd.	2019	-0.000305618	170391	34862.5	121.183	1.31079e+07
City Union Bank Ltd.	2019	0.000802369	35544.5	34862.5	121.183	1.31079e+07
Coal India Ltd.	2019	-0.000466564	336807	34862.5	121.183	1.31079e+07
Cochin Shipyard Ltd.	2019	0.000328099	11627.9	34862.5	121.183	1.31079e+07
Coforge Ltd.	2019	0.00131379	25397.6	34862.5	121.183	1.31079e+07
Colgate-Palmolive (India) Ltd.	2019	0.000463718	35912.6	34862.5	121.183	1.31079e+07
Container Corpn. Of India Ltd.	2019	0.000265526	45601.6	34862.5	121.183	1.31079e+07
Coromandel International Ltd.	2019	0.000698723	10815.2	34862.5	121.183	1.31079e+07
Crisil Ltd.	2019	0.000653833	4146.41	34862.5	121.183	1.31079e+07
Crompton Greaves Consumer Electricals Ltd.	2019	0.000137845	351067	34862.5	121.183	1.31079e+07
Cummins India Ltd.	2019	-0.00174968	28372.4	34862.5	121.183	1.31079e+07
Cyient Ltd.	2019	-0.00168921	9621.8	34862.5	121.183	1.31079e+07
D C M Shriram Ltd.	2019	0.000572725	12002	34862.5	121.183	1.31079e+07
D L F Ltd.	2019	0.00118158	733003	34862.5	121.183	1.31079e+07
Dabur India Ltd.	2019	0.000396151	99685.9	34862.5	121.183	1.31079e+07
Deepak Nitrite Ltd.	2019	0.00211871	34059.8	34862.5	121.183	1.31079e+07
Delta Corp Ltd.	2019	-0.000915118	178609	34862.5	121.183	1.31079e+07
Dilip Buildcon Ltd.	2019	-0.000147716	49516.8	34862.5	121.183	1.31079e+07
Divi'S Laboratories Ltd.	2019	0.000926518	23877.4	34862.5	121.183	1.31079e+07
Dixon Technologies (India) Ltd.	2019	0.00258289	1687.96	34862.5	121.183	1.31079e+07
Dr. Lal Pathlabs Ltd.	2019	0.00199068	6261.89	34862.5	121.183	1.31079e+07
Dr. Reddy'S Laboratories Ltd.	2019	0.000412482	27972.3	34862.5	121.183	1.31079e+07
E I D-Parry (India) Ltd.	2019	-7.62382e-05	47698.8	34862.5	121.183	1.31079e+07
E I H Ltd.	2019	-0.00115569	28949.2	34862.5	121.183	1.31079e+07
E P L Ltd.	2019	0.00192462	90919.4	34862.5	121.183	1.31079e+07
Eclerx Services Ltd.	2019	-0.00262903	5370.12	34862.5	121.183	1.31079e+07
Edelweiss Financial Services Ltd.	2019	-0.00204778	235134	34862.5	121.183	1.31079e+07
Eicher Motors Ltd.	2019	0.000252136	4988.28	34862.5	121.183	1.31079e+07
Elgi Equipments Ltd.	2019	2.80954e-05	9716.14	34862.5	121.183	1.31079e+07
Emami Ltd.	2019	-0.00126251	464753	34862.5	121.183	1.31079e+07
Endurance Technologies Ltd.	2019	-0.000581269	5230.99	34862.5	121.183	1.31079e+07
Engineers India Ltd.	2019	-0.000955506	129949	34862.5	121.183	1.31079e+07
Equitas Holdings Ltd.	2019	-0.000586377	304702	34862.5	121.183	1.31079e+07
Eris Lifesciences Ltd.	2019	-0.00141961	34958.5	34862.5	121.183	1.31079e+07
Escorts Ltd.	2019	-0.000475052	149387	34862.5	121.183	1.31079e+07
Exide Industries Ltd.	2019	-0.00137179	119968	34862.5	121.183	1.31079e+07
F D C Ltd.	2019	0.000838344	10652.9	34862.5	121.183	1.31079e+07
Federal Bank Ltd.	2019	-0.00030364	875934	34862.5	121.183	1.31079e+07
Finolex Cables Ltd.	2019	-0.000818714	9610.14	34862.5	121.183	1.31079e+07
Finolex Industries Ltd.	2019	6.33116e-05	4472.15	34862.5	121.183	1.31079e+07
Firstsource Solutions Ltd.	2019	-0.000672282	277998	34862.5	121.183	1.31079e+07
Fortis Healthcare Ltd.	2019	-0.000247357	334740	34862.5	121.183	1.31079e+07
G A I L (India) Ltd.	2019	-0.00152187	272315	34862.5	121.183	1.31079e+07
G M M Pfaudler Ltd.	2019	0.00186974	1261.85	34862.5	121.183	1.31079e+07
Garware Technical Fibres Ltd.	2019	-2.93869e-05	1630.01	34862.5	121.183	1.31079e+07
General Insurance Corpn. Of India	2019	-0.000541193	25054	34862.5	121.183	1.31079e+07
Glaxosmithkline Pharmaceuticals Ltd.	2019	0.000305411	4197.16	34862.5	121.183	1.31079e+07
Glenmark Pharmaceuticals Ltd.	2019	-0.00275001	72439.9	34862.5	121.183	1.31079e+07
Godfrey Phillips India Ltd.	2019	0.00156488	16391.7	34862.5	121.183	1.31079e+07
Godrej Agrovet Ltd.	2019	0.000151152	9077.47	34862.5	121.183	1.31079e+07
Godrej Consumer Products Ltd.	2019	-0.000673477	65649.9	34862.5	121.183	1.31079e+07
Godrej Industries Ltd.	2019	-0.000954551	20780.1	34862.5	121.183	1.31079e+07
Godrej Properties Ltd.	2019	0.00159439	40593.4	34862.5	121.183	1.31079e+07
Granules India Ltd.	2019	0.00129422	108384	34862.5	121.183	1.31079e+07
Graphite India Ltd.	2019	-0.00369052	240174	34862.5	121.183	1.31079e+07
Grasim Industries Ltd.	2019	-0.000378107	83844.1	34862.5	121.183	1.31079e+07
Great Eastern Shipping Co. Ltd.	2019	-0.000273444	18241.8	34862.5	121.183	1.31079e+07
Grindwell Norton Ltd.	2019	0.000280856	1759.52	34862.5	121.183	1.31079e+07
Gujarat Alkalies & Chemicals Ltd.	2019	-0.00107301	4775.55	34862.5	121.183	1.31079e+07
Gujarat Gas Ltd.	2019	0.00235331	66498.6	34862.5	121.183	1.31079e+07
Gujarat Narmada Valley Fertilizers & Chemicals Ltd.	2019	-0.00302214	59167.7	34862.5	121.183	1.31079e+07
Gujarat Pipavav Port Ltd.	2019	-0.000595016	36404.2	34862.5	121.183	1.31079e+07
Gujarat State Fertilizers & Chemicals Ltd.	2019	-0.00191656	110913	34862.5	121.183	1.31079e+07
Gujarat State Petronet Ltd.	2019	0.000888064	26020.1	34862.5	121.183	1.31079e+07
H C L Technologies Ltd.	2019	0.000749445	73863.5	34862.5	121.183	1.31079e+07
H D F C Bank Ltd.	2019	0.000732108	200731	34862.5	121.183	1.31079e+07
H D F C Life Insurance Co. Ltd.	2019	0.00192556	946694	34862.5	121.183	1.31079e+07
H E G Ltd.	2019	-0.00505702	53764.9	34862.5	121.183	1.31079e+07
H F C L Ltd.	2019	-0.000759601	474684	34862.5	121.183	1.31079e+07
Hathway Cable & Datacom Ltd.	2019	-0.00172209	140179	34862.5	121.183	1.31079e+07
Hatsun Agro Products Ltd.	2019	-0.00049593	7235.21	34862.5	121.183	1.31079e+07
Havells India Ltd.	2019	-0.000266733	68247.5	34862.5	121.183	1.31079e+07
Hero Motocorp Ltd.	2019	-0.000899065	35945.6	34862.5	121.183	1.31079e+07
Hikal Ltd.	2019	-0.00127165	41590.7	34862.5	121.183	1.31079e+07
Hindalco Industries Ltd.	2019	3.22361e-05	391930	34862.5	121.183	1.31079e+07
Hindustan Copper Ltd.	2019	-0.00106726	130420	34862.5	121.183	1.31079e+07
Hindustan Petroleum Corpn. Ltd.	2019	0.000128566	331758	34862.5	121.183	1.31079e+07
Hindustan Unilever Ltd.	2019	0.000306769	84350.4	34862.5	121.183	1.31079e+07
Hindustan Zinc Ltd.	2019	-0.00108418	43034.6	34862.5	121.183	1.31079e+07
Honeywell Automation India Ltd.	2019	0.000960695	339.082	34862.5	121.183	1.31079e+07
Housing & Urban Devp. Corpn. Ltd.	2019	-0.000738505	131107	34862.5	121.183	1.31079e+07
Housing Development Finance Corpn. Ltd.	2019	0.000810064	149820	34862.5	121.183	1.31079e+07
I C I C I Bank Ltd.	2019	0.00159648	1.0727e+06	34862.5	121.183	1.31079e+07
I C I C I Lombard General Insurance Co. Ltd.	2019	0.00190185	136458	34862.5	121.183	1.31079e+07
I C I C I Prudential Life Insurance Co. Ltd.	2019	0.00168191	125833	34862.5	121.183	1.31079e+07
I D B I Bank Ltd.	2019	-0.00206399	854048	34862.5	121.183	1.31079e+07
I D F C First Bank Ltd.	2019	0.00022772	1.27508e+06	34862.5	121.183	1.31079e+07
I D F C Ltd.	2019	-0.000295791	304202	34862.5	121.183	1.31079e+07
I F B Industries Ltd.	2019	-0.000986168	8551.49	34862.5	121.183	1.31079e+07
I I F L Finance Ltd.	2019	-0.00521242	30528.7	34862.5	121.183	1.31079e+07
I R B Infrastructure Developers Ltd.	2019	-0.00308883	180076	34862.5	121.183	1.31079e+07
I T C Ltd.	2019	-0.000676632	595659	34862.5	121.183	1.31079e+07
I T I Ltd.	2019	-4.17057e-05	156488	34862.5	121.183	1.31079e+07
India Cements Ltd.	2019	-0.00110939	391025	34862.5	121.183	1.31079e+07
Indiabulls Housing Finance Ltd.	2019	-0.00404069	1.67375e+06	34862.5	121.183	1.31079e+07
Indiabulls Real Estate Ltd.	2019	-0.00118437	1.11129e+06	34862.5	121.183	1.31079e+07
Indian Bank	2019	-0.0036346	109435	34862.5	121.183	1.31079e+07
Indian Energy Exchange Ltd.	2019	-0.000564849	179429	34862.5	121.183	1.31079e+07
Indian Hotels Co. Ltd.	2019	1.97926e-05	86309.7	34862.5	121.183	1.31079e+07
Indian Oil Corpn. Ltd.	2019	-0.000358937	651011	34862.5	121.183	1.31079e+07
Indian Overseas Bank	2019	-0.00112956	106177	34862.5	121.183	1.31079e+07
Indoco Remedies Ltd.	2019	-0.000587385	14506.9	34862.5	121.183	1.31079e+07
Indraprastha Gas Ltd.	2019	0.00181512	86987.4	34862.5	121.183	1.31079e+07
Indus Towers Ltd.	2019	-0.000171759	1.5302e+06	34862.5	121.183	1.31079e+07
Indusind Bank Ltd.	2019	-0.000176616	182302	34862.5	121.183	1.31079e+07
Infibeam Avenues Ltd.	2019	0.000662813	765235	34862.5	121.183	1.31079e+07
Info Edge (India) Ltd.	2019	0.0023158	15914	34862.5	121.183	1.31079e+07
Infosys Ltd.	2019	0.000364108	523209	34862.5	121.183	1.31079e+07
Inox Leisure Ltd.	2019	0.00177584	20211.3	34862.5	121.183	1.31079e+07
Intellect Design Arena Ltd.	2019	-0.00195913	46718.7	34862.5	121.183	1.31079e+07
Interglobe Aviation Ltd.	2019	0.00056045	92243.9	34862.5	121.183	1.31079e+07
Ipca Laboratories Ltd.	2019	0.00141762	17499	34862.5	121.183	1.31079e+07
J B Chemicals & Pharmaceuticals Ltd.	2019	0.00126794	8571.5	34862.5	121.183	1.31079e+07
J K Cement Ltd.	2019	0.00196467	5488.57	34862.5	121.183	1.31079e+07
J K Lakshmi Cement Ltd.	2019	-0.000461549	5086.61	34862.5	121.183	1.31079e+07
J K Paper Ltd.	2019	-0.000838148	98702.6	34862.5	121.183	1.31079e+07
J M Financial Ltd.	2019	0.000204346	114377	34862.5	121.183	1.31079e+07
J S W Energy Ltd.	2019	-5.84771e-05	76268.1	34862.5	121.183	1.31079e+07
J S W Steel Ltd.	2019	-0.000274843	358914	34862.5	121.183	1.31079e+07
Jamna Auto Inds. Ltd.	2019	-0.00128226	107527	34862.5	121.183	1.31079e+07
Jindal Stainless (Hisar) Ltd.	2019	-0.00065446	77173.6	34862.5	121.183	1.31079e+07
Jindal Stainless Ltd.	2019	0.000548048	62925.5	34862.5	121.183	1.31079e+07
Jindal Steel & Power Ltd.	2019	0.000241899	1.20738e+06	34862.5	121.183	1.31079e+07
Jubilant Foodworks Ltd.	2019	0.00117504	63749.1	34862.5	121.183	1.31079e+07
Jubilant Pharmova Ltd.	2019	-0.00112246	64767.5	34862.5	121.183	1.31079e+07
Just Dial Ltd.	2019	0.000579446	197573	34862.5	121.183	1.31079e+07
Jyothy Labs Ltd.	2019	-0.00135009	17388.2	34862.5	121.183	1.31079e+07
K E C International Ltd.	2019	2.99171e-05	43694.5	34862.5	121.183	1.31079e+07
K N R Constructions Ltd.	2019	0.000641581	7731.47	34862.5	121.183	1.31079e+07
K P R Mill Ltd.	2019	0.000668426	3364.44	34862.5	121.183	1.31079e+07
K R B L Ltd.	2019	-9.12648e-05	19648.7	34862.5	121.183	1.31079e+07
Kajaria Ceramics Ltd.	2019	0.000254082	30712.6	34862.5	121.183	1.31079e+07
Kalpataru Power Transmission Ltd.	2019	0.000311916	11346.6	34862.5	121.183	1.31079e+07
Kansai Nerolac Paints Ltd.	2019	0.000270141	11208.6	34862.5	121.183	1.31079e+07
Kei Industries Ltd.	2019	0.00101177	21045.5	34862.5	121.183	1.31079e+07
Kotak Mahindra Bank Ltd.	2019	0.00124748	179519	34862.5	121.183	1.31079e+07
L & T Finance Holdings Ltd.	2019	-0.000977802	784042	34862.5	121.183	1.31079e+07
L & T Technology Services Ltd.	2019	-0.000614559	13325.8	34862.5	121.183	1.31079e+07
L I C Housing Finance Ltd.	2019	-0.00037352	315751	34862.5	121.183	1.31079e+07
Lakshmi Machine Works Ltd.	2019	-0.00224345	1521.99	34862.5	121.183	1.31079e+07
Larsen & Toubro Infotech Ltd.	2019	5.21486e-05	15469.4	34862.5	121.183	1.31079e+07
Larsen & Toubro Ltd.	2019	-0.000382031	209892	34862.5	121.183	1.31079e+07
Laurus Labs Ltd.	2019	-0.000222564	50220.1	34862.5	121.183	1.31079e+07
Linde India Ltd.	2019	-0.000107934	16015	34862.5	121.183	1.31079e+07
Lupin Ltd.	2019	-0.000346156	80808.3	34862.5	121.183	1.31079e+07
Lux Industries Ltd.	2019	-0.000192373	9677.72	34862.5	121.183	1.31079e+07
M M T C Ltd.	2019	-0.00193463	137947	34862.5	121.183	1.31079e+07
M O I L Ltd.	2019	-0.000602952	17878.9	34862.5	121.183	1.31079e+07
M R F Ltd.	2019	-1.53309e-05	473.959	34862.5	121.183	1.31079e+07
Mahanagar Gas Ltd.	2019	0.000679377	37391.3	34862.5	121.183	1.31079e+07
Mahindra & Mahindra Financial Services Ltd.	2019	-0.00150306	127636	34862.5	121.183	1.31079e+07
Mahindra & Mahindra Ltd.	2019	-0.00135945	283241	34862.5	121.183	1.31079e+07
Mahindra C I E Automotive Ltd.	2019	-0.0016735	47831.2	34862.5	121.183	1.31079e+07
Mahindra Holidays & Resorts India Ltd.	2019	0.000320534	3873.68	34862.5	121.183	1.31079e+07
Mahindra Logistics Ltd.	2019	-0.000989759	32659.4	34862.5	121.183	1.31079e+07
Manappuram Finance Ltd.	2019	0.00266679	273046	34862.5	121.183	1.31079e+07
Mangalore Refinery & Petrochemicals Ltd.	2019	-0.00205666	77883.8	34862.5	121.183	1.31079e+07
Marico Ltd.	2019	-0.000355497	101720	34862.5	121.183	1.31079e+07
Maruti Suzuki India Ltd.	2019	5.28346e-05	71626.2	34862.5	121.183	1.31079e+07
Mastek Ltd.	2019	-0.000327268	10843.7	34862.5	121.183	1.31079e+07
Max Financial Services Ltd.	2019	0.000902307	52175.5	34862.5	121.183	1.31079e+07
Minda Industries Ltd.	2019	0.000268755	13342.7	34862.5	121.183	1.31079e+07
Mindtree Ltd.	2019	-0.000292382	190669	34862.5	121.183	1.31079e+07
Motilal Oswal Financial Services Ltd.	2019	0.000493274	14913.2	34862.5	121.183	1.31079e+07
Mphasis Ltd.	2019	-0.000289811	13425.1	34862.5	121.183	1.31079e+07
Multi Commodity Exchange Of India Ltd.	2019	0.00194383	46756.2	34862.5	121.183	1.31079e+07
Muthoot Finance Ltd.	2019	0.00169428	39844.3	34862.5	121.183	1.31079e+07
N B C C (India) Ltd.	2019	-0.00206857	950006	34862.5	121.183	1.31079e+07
N C C Ltd.	2019	-0.00190926	1.19911e+06	34862.5	121.183	1.31079e+07
N H P C Ltd.	2019	-0.000287848	199051	34862.5	121.183	1.31079e+07
N L C India Ltd.	2019	-0.000721491	39949.6	34862.5	121.183	1.31079e+07
N M D C Ltd.	2019	0.00116631	350753	34862.5	121.183	1.31079e+07
N T P C Ltd.	2019	-0.000105592	548558	34862.5	121.183	1.31079e+07
Narayana Hrudayalaya Ltd.	2019	0.00189718	45321.4	34862.5	121.183	1.31079e+07
Natco Pharma Ltd.	2019	-0.000676077	40449.6	34862.5	121.183	1.31079e+07
National Aluminium Co. Ltd.	2019	-0.00157469	665608	34862.5	121.183	1.31079e+07
Navin Fluorine Intl. Ltd.	2019	0.0014869	7591.12	34862.5	121.183	1.31079e+07
Nesco Ltd.	2019	0.00160226	4794.84	34862.5	121.183	1.31079e+07
Nestle India Ltd.	2019	0.00119317	3876.77	34862.5	121.183	1.31079e+07
Network18 Media & Invst. Ltd.	2019	-0.00207656	55575.8	34862.5	121.183	1.31079e+07
New India Assurance Co. Ltd.	2019	-0.00125668	24718.7	34862.5	121.183	1.31079e+07
Nippon Life India Asset Mgmt. Ltd.	2019	0.00326267	124829	34862.5	121.183	1.31079e+07
Nocil Ltd.	2019	-0.00194469	86131.4	34862.5	121.183	1.31079e+07
Oberoi Realty Ltd.	2019	0.000673824	42890.3	34862.5	121.183	1.31079e+07
Oil & Natural Gas Corpn. Ltd.	2019	-0.000557687	473466	34862.5	121.183	1.31079e+07
Oil India Ltd.	2019	-0.00049893	57276.1	34862.5	121.183	1.31079e+07
Oracle Financial Services Software Ltd.	2019	-0.00123231	3220.38	34862.5	121.183	1.31079e+07
P C B L Ltd.	2019	-0.00226762	118897	34862.5	121.183	1.31079e+07
P I Industries Ltd.	2019	0.00212705	15606.1	34862.5	121.183	1.31079e+07
P N B Housing Finance Ltd.	2019	-0.00305391	40911.8	34862.5	121.183	1.31079e+07
P N C Infratech Ltd.	2019	0.000974376	11298	34862.5	121.183	1.31079e+07
P V R Ltd.	2019	0.000727047	27830.9	34862.5	121.183	1.31079e+07
Page Industries Ltd.	2019	-0.000220968	3602.9	34862.5	121.183	1.31079e+07
Persistent Systems Ltd.	2019	0.000299447	10149.6	34862.5	121.183	1.31079e+07
Petronet L N G Ltd.	2019	0.000655553	171111	34862.5	121.183	1.31079e+07
Pfizer Ltd.	2019	0.00164606	3137.29	34862.5	121.183	1.31079e+07
Phoenix Mills Ltd.	2019	0.00150548	30654.7	34862.5	121.183	1.31079e+07
Pidilite Industries Ltd.	2019	0.000919222	40604.4	34862.5	121.183	1.31079e+07
Piramal Enterprises Ltd.	2019	-0.00165485	60207.3	34862.5	121.183	1.31079e+07
Poly Medicure Ltd.	2019	-0.000339775	3413.73	34862.5	121.183	1.31079e+07
Poonawalla Fincorp Ltd.	2019	-0.0027723	41278.8	34862.5	121.183	1.31079e+07
Power Finance Corpn. Ltd.	2019	0.000506599	507080	34862.5	121.183	1.31079e+07
Power Grid Corpn. Of India Ltd.	2019	-0.000110092	411631	34862.5	121.183	1.31079e+07
Praj Industries Ltd.	2019	-0.000401299	319447	34862.5	121.183	1.31079e+07
Prestige Estates Projects Ltd.	2019	0.00153678	28478.9	34862.5	121.183	1.31079e+07
Prism Johnson Ltd.	2019	-0.00137939	44250.6	34862.5	121.183	1.31079e+07
Procter & Gamble Health Ltd.	2019	0.00146515	2770.84	34862.5	121.183	1.31079e+07
Procter & Gamble Hygiene & Health Care Ltd.	2019	0.000611035	648.922	34862.5	121.183	1.31079e+07
Punjab National Bank	2019	-0.000777335	1.84302e+06	34862.5	121.183	1.31079e+07
Quess Corp Ltd.	2019	-0.00157082	27819	34862.5	121.183	1.31079e+07
R B L Bank Ltd.	2019	-0.00203018	517047	34862.5	121.183	1.31079e+07
R E C Ltd.	2019	0.000755297	376386	34862.5	121.183	1.31079e+07
R H I Magnesita India Ltd.	2019	9.16671e-05	4814.29	34862.5	121.183	1.31079e+07
Radico Khaitan Ltd.	2019	-0.000996364	39233.1	34862.5	121.183	1.31079e+07
Rain Industries Ltd.	2019	-0.0011861	159238	34862.5	121.183	1.31079e+07
Rajesh Exports Ltd.	2019	0.000640116	50933.3	34862.5	121.183	1.31079e+07
Rallis India Ltd.	2019	-0.000222979	27033.6	34862.5	121.183	1.31079e+07
Ramco Cements Ltd.	2019	0.000691182	14997.3	34862.5	121.183	1.31079e+07
Rashtriya Chemicals & Fertilizers Ltd.	2019	-0.00127906	186268	34862.5	121.183	1.31079e+07
Ratnamani Metals & Tubes Ltd.	2019	0.000623986	6816.83	34862.5	121.183	1.31079e+07
Redington (India) Ltd.	2019	0.00121816	111915	34862.5	121.183	1.31079e+07
Relaxo Footwears Ltd.	2019	0.00208943	14597.4	34862.5	121.183	1.31079e+07
Reliance Industries Ltd.	2019	0.00128083	553100	34862.5	121.183	1.31079e+07
S B I Life Insurance Co. Ltd.	2019	0.00193045	746553	34862.5	121.183	1.31079e+07
S I S Ltd.	2019	0.000902115	3056.24	34862.5	121.183	1.31079e+07
S J V N Ltd.	2019	-3.9899e-05	68318.6	34862.5	121.183	1.31079e+07
S K F India Ltd.	2019	0.000537659	3414.14	34862.5	121.183	1.31079e+07
S R F Ltd.	2019	0.00222336	19025.2	34862.5	121.183	1.31079e+07
Sanofi India Ltd.	2019	0.000476262	966.196	34862.5	121.183	1.31079e+07
Saregama India Ltd.	2019	-0.00130041	2233.72	34862.5	121.183	1.31079e+07
Schaeffler India Ltd.	2019	-0.000770048	391.098	34862.5	121.183	1.31079e+07
Sequent Scientific Ltd.	2019	0.000207686	65965.1	34862.5	121.183	1.31079e+07
Sheela Foam Ltd.	2019	-0.000857571	1215.73	34862.5	121.183	1.31079e+07
Shilpa Medicare Ltd.	2019	-0.00119908	2156.66	34862.5	121.183	1.31079e+07
Shipping Corpn. Of India Ltd.	2019	0.00112622	215731	34862.5	121.183	1.31079e+07
Shree Cement Ltd.	2019	0.000751416	1062.49	34862.5	121.183	1.31079e+07
Shriram City Union Finance Ltd.	2019	-0.00054723	2019.71	34862.5	121.183	1.31079e+07
Shriram Transport Finance Co. Ltd.	2019	-8.68582e-05	61912.2	34862.5	121.183	1.31079e+07
Siemens Ltd.	2019	0.00142166	34516.3	34862.5	121.183	1.31079e+07
Sobha Ltd.	2019	-0.000669699	49303	34862.5	121.183	1.31079e+07
Solar Industries India Ltd.	2019	-2.88848e-05	3181.04	34862.5	121.183	1.31079e+07
Sonata Software Ltd.	2019	0.000102238	7256.27	34862.5	121.183	1.31079e+07
State Bank Of India	2019	0.000519073	1.51208e+06	34862.5	121.183	1.31079e+07
Steel Authority Of India Ltd.	2019	-0.000946785	1.81612e+06	34862.5	121.183	1.31079e+07
Sterlite Technologies Ltd.	2019	-0.00370987	252359	34862.5	121.183	1.31079e+07
Strides Pharma Science Ltd.	2019	-0.000965001	117224	34862.5	121.183	1.31079e+07
Sudarshan Chemical Inds. Ltd.	2019	0.000682354	12278.9	34862.5	121.183	1.31079e+07
Sun Pharma Advanced Research Co. Ltd.	2019	-0.000812643	143153	34862.5	121.183	1.31079e+07
Sun Pharmaceutical Inds. Ltd.	2019	-7.2955e-05	507331	34862.5	121.183	1.31079e+07
Sun T V Network Ltd.	2019	-0.00129323	95958.3	34862.5	121.183	1.31079e+07
Sundram Fasteners Ltd.	2019	-0.000271132	5579	34862.5	121.183	1.31079e+07
Sunteck Realty Ltd.	2019	0.000720851	101051	34862.5	121.183	1.31079e+07
Supreme Industries Ltd.	2019	8.19288e-05	9284.09	34862.5	121.183	1.31079e+07
Supreme Petrochem Ltd.	2019	-0.00108394	5828.96	34862.5	121.183	1.31079e+07
Suzlon Energy Ltd.	2019	-0.00429806	4.43284e+06	34862.5	121.183	1.31079e+07
Symphony Ltd.	2019	-4.04183e-06	1617.74	34862.5	121.183	1.31079e+07
Syngene International Ltd.	2019	0.000610485	14096.4	34862.5	121.183	1.31079e+07
T C I Express Ltd.	2019	0.000661975	1327.7	34862.5	121.183	1.31079e+07
T T K Prestige Ltd.	2019	-0.000364046	890.898	34862.5	121.183	1.31079e+07
T V S Motor Co. Ltd.	2019	-0.000543065	110872	34862.5	121.183	1.31079e+07
Tanla Platforms Ltd.	2019	0.003347	57614.4	34862.5	121.183	1.31079e+07
Tata Chemicals Ltd.	2019	-0.000203221	50575.3	34862.5	121.183	1.31079e+07
Tata Coffee Ltd.	2019	-0.000221847	39043.2	34862.5	121.183	1.31079e+07
Tata Communications Ltd.	2019	-0.00131964	31925.3	34862.5	121.183	1.31079e+07
Tata Consultancy Services Ltd.	2019	0.000476512	143615	34862.5	121.183	1.31079e+07
Tata Consumer Products Ltd.	2019	0.00164037	191023	34862.5	121.183	1.31079e+07
Tata Elxsi Ltd.	2019	-0.000883408	66071.9	34862.5	121.183	1.31079e+07
Tata Investment Corpn. Ltd.	2019	-0.000434486	2511.01	34862.5	121.183	1.31079e+07
Tata Motors Ltd.	2019	0.000382301	2.12825e+06	34862.5	121.183	1.31079e+07
Tata Power Co. Ltd.	2019	-0.00114794	900932	34862.5	121.183	1.31079e+07
Tata Steel Ltd.	2019	-0.000184705	716216	34862.5	121.183	1.31079e+07
Tata Teleservices (Maharashtra) Ltd.	2019	-0.00232797	257852	34862.5	121.183	1.31079e+07
Teamlease Services Ltd.	2019	-0.000590323	1771.27	34862.5	121.183	1.31079e+07
Tech Mahindra Ltd.	2019	0.000281087	125152	34862.5	121.183	1.31079e+07
Thermax Ltd.	2019	-0.000207988	20049.1	34862.5	121.183	1.31079e+07
Thyrocare Technologies Ltd.	2019	3.4476e-05	3860.96	34862.5	121.183	1.31079e+07
Timken India Ltd.	2019	0.00171834	3139.38	34862.5	121.183	1.31079e+07
Titan Company Ltd.	2019	0.000990526	114235	34862.5	121.183	1.31079e+07
Torrent Pharmaceuticals Ltd.	2019	0.000172891	12516.3	34862.5	121.183	1.31079e+07
Torrent Power Ltd.	2019	0.000423818	286453	34862.5	121.183	1.31079e+07
Trent Ltd.	2019	0.00163796	19104.5	34862.5	121.183	1.31079e+07
Trident Ltd.	2019	6.05135e-06	129310	34862.5	121.183	1.31079e+07
Triveni Turbine Ltd.	2019	-0.000776886	29152.2	34862.5	121.183	1.31079e+07
Tube Investments Of India Ltd.	2019	0.00127456	46234.6	34862.5	121.183	1.31079e+07
Tv18 Broadcast Ltd.	2019	-0.00237008	396764	34862.5	121.183	1.31079e+07
U P L Ltd.	2019	0.000609786	155704	34862.5	121.183	1.31079e+07
Uco Bank	2019	-0.00114355	109574	34862.5	121.183	1.31079e+07
Uflex Ltd.	2019	-0.00132037	10746.1	34862.5	121.183	1.31079e+07
Ultratech Cement Ltd.	2019	4.77324e-05	25221.2	34862.5	121.183	1.31079e+07
Union Bank Of India	2019	-0.00194945	803955	34862.5	121.183	1.31079e+07
United Breweries Ltd.	2019	-0.00026233	57481.7	34862.5	121.183	1.31079e+07
V I P Industries Ltd.	2019	-0.000629794	34496.1	34862.5	121.183	1.31079e+07
V-Guard Industries Ltd.	2019	-0.000217475	63624	34862.5	121.183	1.31079e+07
V-Mart Retail Ltd.	2019	-0.00173864	3626.42	34862.5	121.183	1.31079e+07
Vaibhav Global Ltd.	2019	0.000634942	2142.23	34862.5	121.183	1.31079e+07
Vakrangee Ltd.	2019	0.00113868	2142.23	34862.5	121.183	1.31079e+07
Vardhman Textiles Ltd.	2019	-0.000512659	2142.23	34862.5	121.183	1.31079e+07
Varun Beverages Ltd.	2019	0.0011899	2142.23	34862.5	121.183	1.31079e+07
Vedanta Ltd.	2019	-0.000963443	2142.23	34862.5	121.183	1.31079e+07
Venky'S (India) Ltd.	2019	-0.00127521	2142.23	34862.5	121.183	1.31079e+07
Vinati Organics Ltd.	2019	0.000868238	3626.42	34862.5	121.183	1.31079e+07
Vodafone Idea Ltd.	2019	-0.00523823	1.88915e+07	34862.5	121.183	1.31079e+07
Voltas Ltd.	2019	0.000829878	71897.3	34862.5	121.183	1.31079e+07
Wabco India Ltd.	2019	-0.000211789	752.824	34862.5	121.183	1.31079e+07
Welspun Corp Ltd.	2019	0.000274352	138194	34862.5	121.183	1.31079e+07
Welspun India Ltd.	2019	-0.000987368	104469	34862.5	121.183	1.31079e+07
Whirlpool Of India Ltd.	2019	0.00215868	6504.07	34862.5	121.183	1.31079e+07
Wipro Ltd.	2019	3.53347e-05	666477	34862.5	121.183	1.31079e+07
Wockhardt Ltd.	2019	-0.00324642	127487	34862.5	121.183	1.31079e+07
Yes Bank Ltd.	2019	-0.0055893	1.12697e+07	34862.5	121.183	1.31079e+07
Zee Entertainment Enterprises Ltd.	2019	-0.00193215	873308	34862.5	121.183	1.31079e+07
Zensar Technologies Ltd.	2019	-0.00113965	17001.6	34862.5	121.183	1.31079e+07
Zydus Wellness Ltd.	2019	0.000339109	1271.62	34862.5	121.183	1.31079e+07

## Sheet:  2020 BSE
Company_Name	YEAR	Adjusted_Return	Adjusted_Share Traded	Gold_Price	WPI_INDEX	GDP_YEAR	COVID Recovery
3M India Ltd.	2020	-0.000101574	435.71	46421.9	121.8	1.23926e+07	0.901179
A B B India Ltd.	2020	-0.000261289	14920.4	46421.9	121.8	1.23926e+07	0.901179
A C C Ltd.	2020	0.000319776	43543.9	46421.9	121.8	1.23926e+07	0.901179
A I A Engineering Ltd.	2020	0.000763371	3227.96	46421.9	121.8	1.23926e+07	0.901179
A P L Apollo Tubes Ltd.	2020	0.00335593	6834.71	46421.9	121.8	1.23926e+07	0.901179
A U Small Finance Bank Ltd.	2020	0.000269975	158340	46421.9	121.8	1.23926e+07	0.901179
Aarti Drugs Ltd.	2020	0.0062039	30214	46421.9	121.8	1.23926e+07	0.901179
Aarti Industries Ltd.	2020	0.00151773	31662.9	46421.9	121.8	1.23926e+07	0.901179
Abbott India Ltd.	2020	0.000716545	1085.51	46421.9	121.8	1.23926e+07	0.901179
Adani Enterprises Ltd.	2020	0.00325052	368451	46421.9	121.8	1.23926e+07	0.901179
Adani Ports & Special Economic Zone Ltd.	2020	0.000920419	382934	46421.9	121.8	1.23926e+07	0.901179
Adani Transmission Ltd.	2020	0.000808166	60680.4	46421.9	121.8	1.23926e+07	0.901179
Aditya Birla Capital Ltd.	2020	-0.000894816	264700	46421.9	121.8	1.23926e+07	0.901179
Aditya Birla Fashion & Retail Ltd.	2020	-0.00142014	119907	46421.9	121.8	1.23926e+07	0.901179
Advanced Enzyme Technologies Ltd.	2020	0.00270814	32783.5	46421.9	121.8	1.23926e+07	0.901179
Aegis Logistics Ltd.	2020	0.000939837	27895.4	46421.9	121.8	1.23926e+07	0.901179
Ajanta Pharma Ltd.	2020	0.00203122	9266.44	46421.9	121.8	1.23926e+07	0.901179
Alembic Pharmaceuticals Ltd.	2020	0.00242444	25527.4	46421.9	121.8	1.23926e+07	0.901179
Alkem Laboratories Ltd.	2020	0.00132232	6732.11	46421.9	121.8	1.23926e+07	0.901179
Alkyl Amines Chemicals Ltd.	2020	0.00472845	4241.15	46421.9	121.8	1.23926e+07	0.901179
Allcargo Logistics Ltd.	2020	0.00100789	31219.4	46421.9	121.8	1.23926e+07	0.901179
Alok Industries Ltd.	2020	0.00141532	5.44298e+06	46421.9	121.8	1.23926e+07	0.901179
Amara Raja Batteries Ltd.	2020	0.000955374	34325.8	46421.9	121.8	1.23926e+07	0.901179
Ambuja Cements Ltd.	2020	0.000761472	207246	46421.9	121.8	1.23926e+07	0.901179
Apollo Hospitals Enterprise Ltd.	2020	0.00189871	61676.5	46421.9	121.8	1.23926e+07	0.901179
Apollo Tyres Ltd.	2020	0.000176599	394657	46421.9	121.8	1.23926e+07	0.901179
Asahi India Glass Ltd.	2020	0.0013184	4705.57	46421.9	121.8	1.23926e+07	0.901179
Ashok Leyland Ltd.	2020	0.000509449	1.93717e+06	46421.9	121.8	1.23926e+07	0.901179
Asian Paints Ltd.	2020	0.00172415	100821	46421.9	121.8	1.23926e+07	0.901179
Astral Ltd.	2020	0.00171573	24980.8	46421.9	121.8	1.23926e+07	0.901179
Astrazeneca Pharma India Ltd.	2020	0.00223459	5261.82	46421.9	121.8	1.23926e+07	0.901179
Atul Ltd.	2020	0.00178288	2800.03	46421.9	121.8	1.23926e+07	0.901179
Aurobindo Pharma Ltd.	2020	0.00273682	229760	46421.9	121.8	1.23926e+07	0.901179
Avanti Feeds Ltd.	2020	-0.000633453	47135.2	46421.9	121.8	1.23926e+07	0.901179
Avenue Supermarts Ltd.	2020	0.00165481	90563.2	46421.9	121.8	1.23926e+07	0.901179
Axis Bank Ltd.	2020	-0.000791308	920470	46421.9	121.8	1.23926e+07	0.901179
B A S F India Ltd.	2020	0.00192903	6115.91	46421.9	121.8	1.23926e+07	0.901179
B E M L Ltd.	2020	-8.03416e-05	52323.4	46421.9	121.8	1.23926e+07	0.901179
Bajaj Auto Ltd.	2020	0.000397341	27586.3	46421.9	121.8	1.23926e+07	0.901179
Bajaj Electricals Ltd.	2020	0.00214811	22438.9	46421.9	121.8	1.23926e+07	0.901179
Bajaj Finance Ltd.	2020	0.000874734	296392	46421.9	121.8	1.23926e+07	0.901179
Bajaj Finserv Ltd.	2020	-0.000259288	33735.9	46421.9	121.8	1.23926e+07	0.901179
Bajaj Holdings & Invst. Ltd.	2020	-0.0004813	3117.46	46421.9	121.8	1.23926e+07	0.901179
Balaji Amines Ltd.	2020	0.00321471	17182	46421.9	121.8	1.23926e+07	0.901179
Balkrishna Industries Ltd.	2020	0.0020618	36978.3	46421.9	121.8	1.23926e+07	0.901179
Balrampur Chini Mills Ltd.	2020	-0.000289961	87079.6	46421.9	121.8	1.23926e+07	0.901179
Bank Of Baroda	2020	-0.00209997	2.0862e+06	46421.9	121.8	1.23926e+07	0.901179
Bank Of India	2020	-0.00151406	696444	46421.9	121.8	1.23926e+07	0.901179
Bank Of Maharashtra	2020	3.66867e-05	317233	46421.9	121.8	1.23926e+07	0.901179
Bata India Ltd.	2020	-0.000410676	50904.5	46421.9	121.8	1.23926e+07	0.901179
Bayer Cropscience Ltd.	2020	0.00158892	1649.25	46421.9	121.8	1.23926e+07	0.901179
Berger Paints India Ltd.	2020	0.00156637	54394.6	46421.9	121.8	1.23926e+07	0.901179
Bharat Electronics Ltd.	2020	0.000600427	739614	46421.9	121.8	1.23926e+07	0.901179
Bharat Forge Ltd.	2020	0.000266095	142572	46421.9	121.8	1.23926e+07	0.901179
Bharat Heavy Electricals Ltd.	2020	-0.000931646	3.317e+06	46421.9	121.8	1.23926e+07	0.901179
Bharat Petroleum Corpn. Ltd.	2020	-0.000978252	372438	46421.9	121.8	1.23926e+07	0.901179
Bharti Airtel Ltd.	2020	0.000447381	1.39157e+06	46421.9	121.8	1.23926e+07	0.901179
Biocon Ltd.	2020	0.00179268	236676	46421.9	121.8	1.23926e+07	0.901179
Birla Corporation Ltd.	2020	0.000543147	17997.1	46421.9	121.8	1.23926e+07	0.901179
Birlasoft Ltd.	2020	0.00481914	150557	46421.9	121.8	1.23926e+07	0.901179
Blue Dart Express Ltd.	2020	0.00245369	3846.57	46421.9	121.8	1.23926e+07	0.901179
Blue Star Ltd.	2020	-4.98633e-05	12641.9	46421.9	121.8	1.23926e+07	0.901179
Bombay Burmah Trdg. Corpn. Ltd.	2020	0.000810586	9391.9	46421.9	121.8	1.23926e+07	0.901179
Bosch Ltd.	2020	-0.000738164	2730.9	46421.9	121.8	1.23926e+07	0.901179
Brigade Enterprises Ltd.	2020	0.000495085	17276.7	46421.9	121.8	1.23926e+07	0.901179
Brightcom Group Ltd.	2020	0.00087341	1.36351e+06	46421.9	121.8	1.23926e+07	0.901179
Britannia Industries Ltd.	2020	0.000626072	25798.7	46421.9	121.8	1.23926e+07	0.901179
C C L Products (India) Ltd.	2020	0.00118923	47535.9	46421.9	121.8	1.23926e+07	0.901179
C E S C Ltd.	2020	-0.000815235	16841.6	46421.9	121.8	1.23926e+07	0.901179
Cadila Healthcare Ltd.	2020	0.00246145	183348	46421.9	121.8	1.23926e+07	0.901179
Can Fin Homes Ltd.	2020	0.000880131	61354.7	46421.9	121.8	1.23926e+07	0.901179
Canara Bank	2020	-0.00227549	783736	46421.9	121.8	1.23926e+07	0.901179
Caplin Point Laboratories Ltd.	2020	0.00214425	29425.4	46421.9	121.8	1.23926e+07	0.901179
Carborundum Universal Ltd.	2020	0.000932407	34809.3	46421.9	121.8	1.23926e+07	0.901179
Castrol India Ltd.	2020	-0.00022082	127249	46421.9	121.8	1.23926e+07	0.901179
Ceat Ltd.	2020	0.000173022	32404.2	46421.9	121.8	1.23926e+07	0.901179
Central Bank Of India	2020	-0.00108387	406422	46421.9	121.8	1.23926e+07	0.901179
Century Plyboards (India) Ltd.	2020	0.00131652	32035.7	46421.9	121.8	1.23926e+07	0.901179
Century Textiles & Inds. Ltd.	2020	-0.000702536	97583.7	46421.9	121.8	1.23926e+07	0.901179
Cera Sanitaryware Ltd.	2020	0.000997455	1977.05	46421.9	121.8	1.23926e+07	0.901179
Chambal Fertilisers & Chemicals Ltd.	2020	0.00154943	77424.9	46421.9	121.8	1.23926e+07	0.901179
Cholamandalam Financial Holdings Ltd.	2020	0.000188892	12836.1	46421.9	121.8	1.23926e+07	0.901179
Cholamandalam Investment & Finance Co. Ltd.	2020	0.000899327	355433	46421.9	121.8	1.23926e+07	0.901179
Cipla Ltd.	2020	0.00217677	269671	46421.9	121.8	1.23926e+07	0.901179
City Union Bank Ltd.	2020	-0.00100046	81338.9	46421.9	121.8	1.23926e+07	0.901179
Coal India Ltd.	2020	-0.00175843	637586	46421.9	121.8	1.23926e+07	0.901179
Cochin Shipyard Ltd.	2020	-0.000379913	26842.3	46421.9	121.8	1.23926e+07	0.901179
Coforge Ltd.	2020	0.00213568	31803.8	46421.9	121.8	1.23926e+07	0.901179
Colgate-Palmolive (India) Ltd.	2020	0.000277957	34034.7	46421.9	121.8	1.23926e+07	0.901179
Container Corpn. Of India Ltd.	2020	-0.00142843	91689.8	46421.9	121.8	1.23926e+07	0.901179
Coromandel International Ltd.	2020	0.00167895	86784.5	46421.9	121.8	1.23926e+07	0.901179
Crisil Ltd.	2020	-1.3803e-05	4002.2	46421.9	121.8	1.23926e+07	0.901179
Crompton Greaves Consumer Electricals Ltd.	2020	0.00182102	54859.7	46421.9	121.8	1.23926e+07	0.901179
Cummins India Ltd.	2020	3.60942e-05	56684.8	46421.9	121.8	1.23926e+07	0.901179
Cyient Ltd.	2020	0.00058335	42964.5	46421.9	121.8	1.23926e+07	0.901179
D C M Shriram Ltd.	2020	-1.80262e-05	9825.62	46421.9	121.8	1.23926e+07	0.901179
D L F Ltd.	2020	-1.53083e-05	748072	46421.9	121.8	1.23926e+07	0.901179
Dabur India Ltd.	2020	0.000591942	121983	46421.9	121.8	1.23926e+07	0.901179
Deepak Nitrite Ltd.	2020	0.00355542	92764.5	46421.9	121.8	1.23926e+07	0.901179
Delta Corp Ltd.	2020	-0.000894376	216379	46421.9	121.8	1.23926e+07	0.901179
Dilip Buildcon Ltd.	2020	-0.000203494	22557.7	46421.9	121.8	1.23926e+07	0.901179
Divi'S Laboratories Ltd.	2020	0.00295394	41149.9	46421.9	121.8	1.23926e+07	0.901179
Dixon Technologies (India) Ltd.	2020	0.00489553	4468.6	46421.9	121.8	1.23926e+07	0.901179
Dr. Lal Pathlabs Ltd.	2020	0.00161945	8756.39	46421.9	121.8	1.23926e+07	0.901179
Dr. Reddy'S Laboratories Ltd.	2020	0.00236981	49308.7	46421.9	121.8	1.23926e+07	0.901179
E I D-Parry (India) Ltd.	2020	0.00170591	39049.4	46421.9	121.8	1.23926e+07	0.901179
E I H Ltd.	2020	-0.00179775	60715.9	46421.9	121.8	1.23926e+07	0.901179
E P L Ltd.	2020	0.0013521	325392	46421.9	121.8	1.23926e+07	0.901179
Eclerx Services Ltd.	2020	0.00127827	9640.43	46421.9	121.8	1.23926e+07	0.901179
Edelweiss Financial Services Ltd.	2020	-0.00222359	233352	46421.9	121.8	1.23926e+07	0.901179
Eicher Motors Ltd.	2020	0.000625658	29746.5	46421.9	121.8	1.23926e+07	0.901179
Elgi Equipments Ltd.	2020	0.000443625	24756.9	46421.9	121.8	1.23926e+07	0.901179
Emami Ltd.	2020	0.00122122	56404.6	46421.9	121.8	1.23926e+07	0.901179
Endurance Technologies Ltd.	2020	0.000908581	24277.9	46421.9	121.8	1.23926e+07	0.901179
Engineers India Ltd.	2020	-0.000938851	194189	46421.9	121.8	1.23926e+07	0.901179
Equitas Holdings Ltd.	2020	-0.00181603	612276	46421.9	121.8	1.23926e+07	0.901179
Eris Lifesciences Ltd.	2020	0.000672099	18762.7	46421.9	121.8	1.23926e+07	0.901179
Escorts Ltd.	2020	0.00282195	129112	46421.9	121.8	1.23926e+07	0.901179
Exide Industries Ltd.	2020	4.79868e-05	170076	46421.9	121.8	1.23926e+07	0.901179
F D C Ltd.	2020	0.00180317	36928.9	46421.9	121.8	1.23926e+07	0.901179
Federal Bank Ltd.	2020	-0.00128474	1809986	46421.9	121.8	1.23926e+07	0.901179
Finolex Cables Ltd.	2020	-0.000613198	10265.2	46421.9	121.8	1.23926e+07	0.901179
Finolex Industries Ltd.	2020	0.000657755	11942	46421.9	121.8	1.23926e+07	0.901179
Firstsource Solutions Ltd.	2020	0.00348624	252770	46421.9	121.8	1.23926e+07	0.901179
Fortis Healthcare Ltd.	2020	0.000567565	179349	46421.9	121.8	1.23926e+07	0.901179
G A I L (India) Ltd.	2020	-3.21577e-06	865377	46421.9	121.8	1.23926e+07	0.901179
G M M Pfaudler Ltd.	2020	0.00280116	7105.75	46421.9	121.8	1.23926e+07	0.901179
Garware Technical Fibres Ltd.	2020	0.0024743	1893.2	46421.9	121.8	1.23926e+07	0.901179
General Insurance Corpn. Of India	2020	-0.00225319	40288.5	46421.9	121.8	1.23926e+07	0.901179
Glaxosmithkline Pharmaceuticals Ltd.	2020	2.44479e-07	5916.79	46421.9	121.8	1.23926e+07	0.901179
Glenmark Pharmaceuticals Ltd.	2020	0.00131482	256702	46421.9	121.8	1.23926e+07	0.901179
Godfrey Phillips India Ltd.	2020	-0.00130964	15374.2	46421.9	121.8	1.23926e+07	0.901179
Godrej Agrovet Ltd.	2020	0.000111694	31319	46421.9	121.8	1.23926e+07	0.901179
Godrej Consumer Products Ltd.	2020	0.000313655	67646.2	46421.9	121.8	1.23926e+07	0.901179
Godrej Industries Ltd.	2020	-6.3754e-05	49246.8	46421.9	121.8	1.23926e+07	0.901179
Godrej Properties Ltd.	2020	0.00155701	35494.8	46421.9	121.8	1.23926e+07	0.901179
Granules India Ltd.	2020	0.00420649	178200	46421.9	121.8	1.23926e+07	0.901179
Graphite India Ltd.	2020	-8.79284e-05	104938	46421.9	121.8	1.23926e+07	0.901179
Grasim Industries Ltd.	2020	0.000754136	101935	46421.9	121.8	1.23926e+07	0.901179
Great Eastern Shipping Co. Ltd.	2020	-0.000524893	21473.9	46421.9	121.8	1.23926e+07	0.901179
Grindwell Norton Ltd.	2020	0.000730212	8751.05	46421.9	121.8	1.23926e+07	0.901179
Gujarat Alkalies & Chemicals Ltd.	2020	-0.000735805	12410.9	46421.9	121.8	1.23926e+07	0.901179
Gujarat Gas Ltd.	2020	0.00154627	65817.6	46421.9	121.8	1.23926e+07	0.901179
Gujarat Narmada Valley Fertilizers & Chemicals Ltd.	2020	0.00113215	104357	46421.9	121.8	1.23926e+07	0.901179
Gujarat Pipavav Port Ltd.	2020	0.000331683	83098.4	46421.9	121.8	1.23926e+07	0.901179
Gujarat State Fertilizers & Chemicals Ltd.	2020	-1.09545e-05	105795	46421.9	121.8	1.23926e+07	0.901179
Gujarat State Petronet Ltd.	2020	-0.000193569	42123.6	46421.9	121.8	1.23926e+07	0.901179
H C L Technologies Ltd.	2020	0.00198619	269733	46421.9	121.8	1.23926e+07	0.901179
H D F C Bank Ltd.	2020	0.000437864	702382	46421.9	121.8	1.23926e+07	0.901179
H D F C Life Insurance Co. Ltd.	2020	0.00025724	842105	46421.9	121.8	1.23926e+07	0.901179
H E G Ltd.	2020	-0.000598598	34871.2	46421.9	121.8	1.23926e+07	0.901179
H F C L Ltd.	2020	0.00144299	707121	46421.9	121.8	1.23926e+07	0.901179
Hathway Cable & Datacom Ltd.	2020	0.0020611	188210	46421.9	121.8	1.23926e+07	0.901179
Hatsun Agro Products Ltd.	2020	0.00199715	3945	46421.9	121.8	1.23926e+07	0.901179
Havells India Ltd.	2020	0.00133486	99798.4	46421.9	121.8	1.23926e+07	0.901179
Hero Motocorp Ltd.	2020	0.000979489	49027.7	46421.9	121.8	1.23926e+07	0.901179
Hikal Ltd.	2020	0.000950757	75893.4	46421.9	121.8	1.23926e+07	0.901179
Hindalco Industries Ltd.	2020	0.000349936	638911	46421.9	121.8	1.23926e+07	0.901179
Hindustan Copper Ltd.	2020	0.0009238	194337	46421.9	121.8	1.23926e+07	0.901179
Hindustan Petroleum Corpn. Ltd.	2020	-0.00084559	397746	46421.9	121.8	1.23926e+07	0.901179
Hindustan Unilever Ltd.	2020	0.000837475	171836	46421.9	121.8	1.23926e+07	0.901179
Hindustan Zinc Ltd.	2020	0.000434001	96105.1	46421.9	121.8	1.23926e+07	0.901179
Honeywell Automation India Ltd.	2020	0.00125491	419.405	46421.9	121.8	1.23926e+07	0.901179
Housing & Urban Devp. Corpn. Ltd.	2020	9.09958e-05	181285	46421.9	121.8	1.23926e+07	0.901179
Housing Development Finance Corpn. Ltd.	2020	0.000145959	277267	46421.9	121.8	1.23926e+07	0.901179
I C I C I Bank Ltd.	2020	-4.35387e-05	1.60865e+06	46421.9	121.8	1.23926e+07	0.901179
I C I C I Lombard General Insurance Co. Ltd.	2020	0.000443329	44810.6	46421.9	121.8	1.23926e+07	0.901179
I C I C I Prudential Life Insurance Co. Ltd.	2020	9.3868e-05	144100	46421.9	121.8	1.23926e+07	0.901179
I D B I Bank Ltd.	2020	-0.000742592	632581	46421.9	121.8	1.23926e+07	0.901179
I D F C First Bank Ltd.	2020	-0.000871542	2.13781e+06	46421.9	121.8	1.23926e+07	0.901179
I D F C Ltd.	2020	-0.000116255	586703	46421.9	121.8	1.23926e+07	0.901179
I F B Industries Ltd.	2020	0.00217044	7321.75	46421.9	121.8	1.23926e+07	0.901179
I I F L Finance Ltd.	2020	-0.000909489	64442.5	46421.9	121.8	1.23926e+07	0.901179
I R B Infrastructure Developers Ltd.	2020	0.00186046	162453	46421.9	121.8	1.23926e+07	0.901179
I T C Ltd.	2020	-0.00054552	1.30297e+06	46421.9	121.8	1.23926e+07	0.901179
I T I Ltd.	2020	0.0011083	164077	46421.9	121.8	1.23926e+07	0.901179
India Cements Ltd.	2020	0.00311779	391788	46421.9	121.8	1.23926e+07	0.901179
Indiabulls Housing Finance Ltd.	2020	-0.00154422	1.9372e+06	46421.9	121.8	1.23926e+07	0.901179
Indiabulls Real Estate Ltd.	2020	0.000167524	352599	46421.9	121.8	1.23926e+07	0.901179
Indian Bank	2020	-0.000730836	179736	46421.9	121.8	1.23926e+07	0.901179
Indian Energy Exchange Ltd.	2020	0.00166029	174954	46421.9	121.8	1.23926e+07	0.901179
Indian Hotels Co. Ltd.	2020	-0.000788683	222809	46421.9	121.8	1.23926e+07	0.901179
Indian Oil Corpn. Ltd.	2020	-0.00132491	1.18166e+06	46421.9	121.8	1.23926e+07	0.901179
Indian Overseas Bank	2020	-0.000163176	391105	46421.9	121.8	1.23926e+07	0.901179
Indoco Remedies Ltd.	2020	0.00197955	14405.8	46421.9	121.8	1.23926e+07	0.901179
Indraprastha Gas Ltd.	2020	0.000693497	133007	46421.9	121.8	1.23926e+07	0.901179
Indus Towers Ltd.	2020	-0.000393495	838330	46421.9	121.8	1.23926e+07	0.901179
Indusind Bank Ltd.	2020	-0.00212527	1.11575e+06	46421.9	121.8	1.23926e+07	0.901179
Infibeam Avenues Ltd.	2020	0.00177376	159116	46421.9	121.8	1.23926e+07	0.901179
Info Edge (India) Ltd.	2020	0.00251081	31558.4	46421.9	121.8	1.23926e+07	0.901179
Infosys Ltd.	2020	0.0021274	498103	46421.9	121.8	1.23926e+07	0.901179
Inox Leisure Ltd.	2020	-0.00116452	90766.9	46421.9	121.8	1.23926e+07	0.901179
Intellect Design Arena Ltd.	2020	0.00306328	32938.3	46421.9	121.8	1.23926e+07	0.901179
Interglobe Aviation Ltd.	2020	0.00101904	129084	46421.9	121.8	1.23926e+07	0.901179
Ipca Laboratories Ltd.	2020	0.00258886	21641.8	46421.9	121.8	1.23926e+07	0.901179
J B Chemicals & Pharmaceuticals Ltd.	2020	0.00339035	13889.7	46421.9	121.8	1.23926e+07	0.901179
J K Cement Ltd.	2020	0.0018009	9172.81	46421.9	121.8	1.23926e+07	0.901179
J K Lakshmi Cement Ltd.	2020	0.000451466	22654.6	46421.9	121.8	1.23926e+07	0.901179
J K Paper Ltd.	2020	-0.000786123	88804.2	46421.9	121.8	1.23926e+07	0.901179
J M Financial Ltd.	2020	-0.00044434	122888	46421.9	121.8	1.23926e+07	0.901179
J S W Energy Ltd.	2020	-9.82005e-05	233342	46421.9	121.8	1.23926e+07	0.901179
J S W Steel Ltd.	2020	0.00133726	572447	46421.9	121.8	1.23926e+07	0.901179
Jamna Auto Inds. Ltd.	2020	0.00104792	159765	46421.9	121.8	1.23926e+07	0.901179
Jindal Stainless (Hisar) Ltd.	2020	0.00224387	64288.3	46421.9	121.8	1.23926e+07	0.901179
Jindal Stainless Ltd.	2020	0.00258388	117318	46421.9	121.8	1.23926e+07	0.901179
Jindal Steel & Power Ltd.	2020	0.00169874	1.00412e+06	46421.9	121.8	1.23926e+07	0.901179
Jubilant Foodworks Ltd.	2020	0.0020093	38173.8	46421.9	121.8	1.23926e+07	0.901179
Jubilant Pharmova Ltd.	2020	0.00181593	51748.5	46421.9	121.8	1.23926e+07	0.901179
Just Dial Ltd.	2020	0.00048152	167266	46421.9	121.8	1.23926e+07	0.901179
Jyothy Labs Ltd.	2020	-0.00013331	45336.8	46421.9	121.8	1.23926e+07	0.901179
K E C International Ltd.	2020	0.000635097	30773.4	46421.9	121.8	1.23926e+07	0.901179
K N R Constructions Ltd.	2020	0.000822782	15402.2	46421.9	121.8	1.23926e+07	0.901179
K P R Mill Ltd.	2020	0.00121335	3929.94	46421.9	121.8	1.23926e+07	0.901179
K R B L Ltd.	2020	-0.000689059	31224.4	46421.9	121.8	1.23926e+07	0.901179
Kajaria Ceramics Ltd.	2020	0.00110713	38277.4	46421.9	121.8	1.23926e+07	0.901179
Kalpataru Power Transmission Ltd.	2020	-0.00104456	36715.3	46421.9	121.8	1.23926e+07	0.901179
Kansai Nerolac Paints Ltd.	2020	0.000575189	16534.6	46421.9	121.8	1.23926e+07	0.901179
Kei Industries Ltd.	2020	2.71156e-05	16559	46421.9	121.8	1.23926e+07	0.901179
Kotak Mahindra Bank Ltd.	2020	0.000702988	512136	46421.9	121.8	1.23926e+07	0.901179
L & T Finance Holdings Ltd.	2020	-0.00101501	1.29184e+06	46421.9	121.8	1.23926e+07	0.901179
L & T Technology Services Ltd.	2020	0.00173767	8465.53	46421.9	121.8	1.23926e+07	0.901179
L I C Housing Finance Ltd.	2020	-0.000926585	275935	46421.9	121.8	1.23926e+07	0.901179
Lakshmi Machine Works Ltd.	2020	0.00129349	2849.57	46421.9	121.8	1.23926e+07	0.901179
Larsen & Toubro Infotech Ltd.	2020	0.00276716	17249.9	46421.9	121.8	1.23926e+07	0.901179
Larsen & Toubro Ltd.	2020	-0.000173225	272366	46421.9	121.8	1.23926e+07	0.901179
Laurus Labs Ltd.	2020	0.00617072	295266	46421.9	121.8	1.23926e+07	0.901179
Linde India Ltd.	2020	0.00146438	10346.3	46421.9	121.8	1.23926e+07	0.901179
Lupin Ltd.	2020	0.000918179	126123	46421.9	121.8	1.23926e+07	0.901179
Lux Industries Ltd.	2020	0.000852857	2891.92	46421.9	121.8	1.23926e+07	0.901179
M M T C Ltd.	2020	0.00106223	174822	46421.9	121.8	1.23926e+07	0.901179
M O I L Ltd.	2020	-0.000301599	30624.6	46421.9	121.8	1.23926e+07	0.901179
M R F Ltd.	2020	0.000466701	787.877	46421.9	121.8	1.23926e+07	0.901179
Mahanagar Gas Ltd.	2020	-1.43734e-05	54147	46421.9	121.8	1.23926e+07	0.901179
Mahindra & Mahindra Financial Services Ltd.	2020	-0.000670171	746516	46421.9	121.8	1.23926e+07	0.901179
Mahindra & Mahindra Ltd.	2020	0.00114564	227387	46421.9	121.8	1.23926e+07	0.901179
Mahindra C I E Automotive Ltd.	2020	5.93417e-05	16302.3	46421.9	121.8	1.23926e+07	0.901179
Mahindra Holidays & Resorts India Ltd.	2020	-0.000314353	9810.32	46421.9	121.8	1.23926e+07	0.901179
Mahindra Logistics Ltd.	2020	-4.33693e-05	6738.8	46421.9	121.8	1.23926e+07	0.901179
Manappuram Finance Ltd.	2020	-0.000302962	619361	46421.9	121.8	1.23926e+07	0.901179
Mangalore Refinery & Petrochemicals Ltd.	2020	-0.000843855	131237	46421.9	121.8	1.23926e+07	0.901179
Marico Ltd.	2020	0.000702647	129447	46421.9	121.8	1.23926e+07	0.901179
Maruti Suzuki India Ltd.	2020	0.000168434	48989.3	46421.9	121.8	1.23926e+07	0.901179
Mastek Ltd.	2020	0.00391066	14563	46421.9	121.8	1.23926e+07	0.901179
Max Financial Services Ltd.	2020	0.000779584	156544	46421.9	121.8	1.23926e+07	0.901179
Minda Industries Ltd.	2020	0.000404351	15240.7	46421.9	121.8	1.23926e+07	0.901179
Mindtree Ltd.	2020	0.00282563	58875.5	46421.9	121.8	1.23926e+07	0.901179
Motilal Oswal Financial Services Ltd.	2020	-0.00127333	7678.66	46421.9	121.8	1.23926e+07	0.901179
Mphasis Ltd.	2020	0.00216009	24978	46421.9	121.8	1.23926e+07	0.901179
Multi Commodity Exchange Of India Ltd.	2020	0.00148548	36632.8	46421.9	121.8	1.23926e+07	0.901179
Muthoot Finance Ltd.	2020	0.00180567	108163	46421.9	121.8	1.23926e+07	0.901179
N B C C (India) Ltd.	2020	-0.000995764	830765	46421.9	121.8	1.23926e+07	0.901179
N C C Ltd.	2020	-5.46883e-05	1.34816e+06	46421.9	121.8	1.23926e+07	0.901179
N H P C Ltd.	2020	-0.000220515	452967	46421.9	121.8	1.23926e+07	0.901179
N L C India Ltd.	2020	-0.000199945	72191.9	46421.9	121.8	1.23926e+07	0.901179
N M D C Ltd.	2020	-0.000543737	408556	46421.9	121.8	1.23926e+07	0.901179
N T P C Ltd.	2020	-0.000795767	929676	46421.9	121.8	1.23926e+07	0.901179
Narayana Hrudayalaya Ltd.	2020	0.00121768	51927.4	46421.9	121.8	1.23926e+07	0.901179
Natco Pharma Ltd.	2020	0.00173814	22351.8	46421.9	121.8	1.23926e+07	0.901179
National Aluminium Co. Ltd.	2020	-0.000254091	824299	46421.9	121.8	1.23926e+07	0.901179
Navin Fluorine Intl. Ltd.	2020	0.0037883	14688.8	46421.9	121.8	1.23926e+07	0.901179
Nesco Ltd.	2020	-0.000788379	8926.92	46421.9	121.8	1.23926e+07	0.901179
Nestle India Ltd.	2020	0.00088256	5506.64	46421.9	121.8	1.23926e+07	0.901179
Network18 Media & Invst. Ltd.	2020	0.00137297	224380	46421.9	121.8	1.23926e+07	0.901179
New India Assurance Co. Ltd.	2020	-0.000474407	40361.3	46421.9	121.8	1.23926e+07	0.901179
Nippon Life India Asset Mgmt. Ltd.	2020	-0.000676054	106287	46421.9	121.8	1.23926e+07	0.901179
Nocil Ltd.	2020	0.00105817	196785	46421.9	121.8	1.23926e+07	0.901179
Oberoi Realty Ltd.	2020	0.000389086	49520.6	46421.9	121.8	1.23926e+07	0.901179
Oil & Natural Gas Corpn. Ltd.	2020	-0.00125906	1.45767e+06	46421.9	121.8	1.23926e+07	0.901179
Oil India Ltd.	2020	-0.00140557	137306	46421.9	121.8	1.23926e+07	0.901179
Oracle Financial Services Software Ltd.	2020	0.000656399	3298.86	46421.9	121.8	1.23926e+07	0.901179
P C B L Ltd.	2020	0.00122766	131594	46421.9	121.8	1.23926e+07	0.901179
P I Industries Ltd.	2020	0.00167739	16731.9	46421.9	121.8	1.23926e+07	0.901179
P N B Housing Finance Ltd.	2020	-0.00119863	65640.1	46421.9	121.8	1.23926e+07	0.901179
P N C Infratech Ltd.	2020	-0.000479985	17216.8	46421.9	121.8	1.23926e+07	0.901179
P V R Ltd.	2020	-0.00132992	103736	46421.9	121.8	1.23926e+07	0.901179
Page Industries Ltd.	2020	0.000624754	2357.03	46421.9	121.8	1.23926e+07	0.901179
Persistent Systems Ltd.	2020	0.00298271	10287	46421.9	121.8	1.23926e+07	0.901179
Petronet L N G Ltd.	2020	-0.00032748	148580	46421.9	121.8	1.23926e+07	0.901179
Pfizer Ltd.	2020	0.000744734	6440.5	46421.9	121.8	1.23926e+07	0.901179
Phoenix Mills Ltd.	2020	-0.000312646	112749	46421.9	121.8	1.23926e+07	0.901179
Pidilite Industries Ltd.	2020	0.000924897	72929.5	46421.9	121.8	1.23926e+07	0.901179
Piramal Enterprises Ltd.	2020	-0.000255177	90332.1	46421.9	121.8	1.23926e+07	0.901179
Poly Medicure Ltd.	2020	0.00343625	17230.3	46421.9	121.8	1.23926e+07	0.901179
Poonawalla Fincorp Ltd.	2020	-0.00127451	175043	46421.9	121.8	1.23926e+07	0.901179
Power Finance Corpn. Ltd.	2020	-0.000188233	479759	46421.9	121.8	1.23926e+07	0.901179
Power Grid Corpn. Of India Ltd.	2020	-0.000111325	544533	46421.9	121.8	1.23926e+07	0.901179
Praj Industries Ltd.	2020	0.000113312	150081	46421.9	121.8	1.23926e+07	0.901179
Prestige Estates Projects Ltd.	2020	-0.000854338	47872.3	46421.9	121.8	1.23926e+07	0.901179
Prism Johnson Ltd.	2020	0.00108078	85193.3	46421.9	121.8	1.23926e+07	0.901179
Procter & Gamble Health Ltd.	2020	0.00173958	1504.98	46421.9	121.8	1.23926e+07	0.901179
Procter & Gamble Hygiene & Health Care Ltd.	2020	-8.76619e-05	699.734	46421.9	121.8	1.23926e+07	0.901179
Punjab National Bank	2020	-0.00278644	2.32563e+06	46421.9	121.8	1.23926e+07	0.901179
Quess Corp Ltd.	2020	0.000319416	30962.1	46421.9	121.8	1.23926e+07	0.901179
R B L Bank Ltd.	2020	-0.00186338	1.35617e+06	46421.9	121.8	1.23926e+07	0.901179
R E C Ltd.	2020	-0.0003272	470774	46421.9	121.8	1.23926e+07	0.901179
R H I Magnesita India Ltd.	2020	0.000166457	14415.7	46421.9	121.8	1.23926e+07	0.901179
Radico Khaitan Ltd.	2020	0.00134738	45593.2	46421.9	121.8	1.23926e+07	0.901179
Rain Industries Ltd.	2020	0.000724126	158466	46421.9	121.8	1.23926e+07	0.901179
Rajesh Exports Ltd.	2020	-0.00134098	25072.1	46421.9	121.8	1.23926e+07	0.901179
Rallis India Ltd.	2020	0.00179662	51680.9	46421.9	121.8	1.23926e+07	0.901179
Ramco Cements Ltd.	2020	0.000135879	22611.3	46421.9	121.8	1.23926e+07	0.901179
Rashtriya Chemicals & Fertilizers Ltd.	2020	0.000336199	217878	46421.9	121.8	1.23926e+07	0.901179
Ratnamani Metals & Tubes Ltd.	2020	0.00143817	3173.98	46421.9	121.8	1.23926e+07	0.901179
Redington (India) Ltd.	2020	0.000490121	48510.4	46421.9	121.8	1.23926e+07	0.901179
Relaxo Footwears Ltd.	2020	0.00105004	16266.5	46421.9	121.8	1.23926e+07	0.901179
Reliance Industries Ltd.	2020	0.00105616	1.65481e+06	46421.9	121.8	1.23926e+07	0.901179
S B I Life Insurance Co. Ltd.	2020	-0.000277919	51517.6	46421.9	121.8	1.23926e+07	0.901179
S I S Ltd.	2020	-0.000494666	15847.3	46421.9	121.8	1.23926e+07	0.901179
S J V N Ltd.	2020	-0.000133465	128651	46421.9	121.8	1.23926e+07	0.901179
S K F India Ltd.	2020	-0.00103922	2523.86	46421.9	121.8	1.23926e+07	0.901179
S R F Ltd.	2020	0.001885	11451.9	46421.9	121.8	1.23926e+07	0.901179
Sanofi India Ltd.	2020	0.000696137	2779.15	46421.9	121.8	1.23926e+07	0.901179
Saregama India Ltd.	2020	0.00271362	2758.07	46421.9	121.8	1.23926e+07	0.901179
Schaeffler India Ltd.	2020	-7.03262e-05	660.194	46421.9	121.8	1.23926e+07	0.901179
Sequent Scientific Ltd.	2020	0.00336971	586405	46421.9	121.8	1.23926e+07	0.901179
Sheela Foam Ltd.	2020	0.00093566	6469.54	46421.9	121.8	1.23926e+07	0.901179
Shilpa Medicare Ltd.	2020	0.00178284	46028.8	46421.9	121.8	1.23926e+07	0.901179
Shipping Corpn. Of India Ltd.	2020	0.00137543	222820	46421.9	121.8	1.23926e+07	0.901179
Shree Cement Ltd.	2020	0.000491254	1734.67	46421.9	121.8	1.23926e+07	0.901179
Shriram City Union Finance Ltd.	2020	-0.000856775	2426	46421.9	121.8	1.23926e+07	0.901179
Shriram Transport Finance Co. Ltd.	2020	-0.000304804	208707	46421.9	121.8	1.23926e+07	0.901179
Siemens Ltd.	2020	0.000160802	1.04583e+06	46421.9	121.8	1.23926e+07	0.901179
Sobha Ltd.	2020	5.83826e-05	49242	46421.9	121.8	1.23926e+07	0.901179
Solar Industries India Ltd.	2020	-8.19745e-05	4357.38	46421.9	121.8	1.23926e+07	0.901179
Sonata Software Ltd.	2020	0.000905543	33110.9	46421.9	121.8	1.23926e+07	0.901179
State Bank Of India	2020	-0.000837393	3.13024e+06	46421.9	121.8	1.23926e+07	0.901179
Steel Authority Of India Ltd.	2020	0.00178557	2.11471e+06	46421.9	121.8	1.23926e+07	0.901179
Sterlite Technologies Ltd.	2020	0.00145668	169385	46421.9	121.8	1.23926e+07	0.901179
Strides Pharma Science Ltd.	2020	0.00336252	149915	46421.9	121.8	1.23926e+07	0.901179
Sudarshan Chemical Inds. Ltd.	2020	0.000576404	28296.5	46421.9	121.8	1.23926e+07	0.901179
Sun Pharma Advanced Research Co. Ltd.	2020	0.000752666	115863	46421.9	121.8	1.23926e+07	0.901179
Sun Pharmaceutical Inds. Ltd.	2020	0.00122201	394044	46421.9	121.8	1.23926e+07	0.901179
Sun T V Network Ltd.	2020	0.000408484	132054	46421.9	121.8	1.23926e+07	0.901179
Sundram Fasteners Ltd.	2020	0.000142071	7856.53	46421.9	121.8	1.23926e+07	0.901179
Sunteck Realty Ltd.	2020	-0.000853986	71594.7	46421.9	121.8	1.23926e+07	0.901179
Supreme Industries Ltd.	2020	0.00140344	13447.6	46421.9	121.8	1.23926e+07	0.901179
Supreme Petrochem Ltd.	2020	0.00312349	5977.77	46421.9	121.8	1.23926e+07	0.901179
Suzlon Energy Ltd.	2020	0.00417029	6.40961e+06	46421.9	121.8	1.23926e+07	0.901179
Symphony Ltd.	2020	-0.000390466	5395.77	46421.9	121.8	1.23926e+07	0.901179
Syngene International Ltd.	2020	0.00256454	29114.2	46421.9	121.8	1.23926e+07	0.901179
T C I Express Ltd.	2020	0.000939092	3105.79	46421.9	121.8	1.23926e+07	0.901179
T T K Prestige Ltd.	2020	0.00026429	1178.67	46421.9	121.8	1.23926e+07	0.901179
T V S Motor Co. Ltd.	2020	0.00022444	102848	46421.9	121.8	1.23926e+07	0.901179
Tanla Platforms Ltd.	2020	0.00905062	131261	46421.9	121.8	1.23926e+07	0.901179
Tata Chemicals Ltd.	2020	-0.00136037	153042	46421.9	121.8	1.23926e+07	0.901179
Tata Coffee Ltd.	2020	0.000491629	77790.9	46421.9	121.8	1.23926e+07	0.901179
Tata Communications Ltd.	2020	0.00396719	19739.1	46421.9	121.8	1.23926e+07	0.901179
Tata Consultancy Services Ltd.	2020	0.00113276	166718	46421.9	121.8	1.23926e+07	0.901179
Tata Consumer Products Ltd.	2020	0.00238226	228937	46421.9	121.8	1.23926e+07	0.901179
Tata Elxsi Ltd.	2020	0.00315371	61926.9	46421.9	121.8	1.23926e+07	0.901179
Tata Investment Corpn. Ltd.	2020	0.000835131	3303.48	46421.9	121.8	1.23926e+07	0.901179
Tata Motors Ltd.	2020	-0.000213415	3.59597e+06	46421.9	121.8	1.23926e+07	0.901179
Tata Power Co. Ltd.	2020	0.00105426	1.50991e+06	46421.9	121.8	1.23926e+07	0.901179
Tata Steel Ltd.	2020	0.00112283	750567	46421.9	121.8	1.23926e+07	0.901179
Tata Teleservices (Maharashtra) Ltd.	2020	0.00479597	938037	46421.9	121.8	1.23926e+07	0.901179
Teamlease Services Ltd.	2020	0.000174729	4261.9	46421.9	121.8	1.23926e+07	0.901179
Tech Mahindra Ltd.	2020	0.000949418	165365	46421.9	121.8	1.23926e+07	0.901179
Thermax Ltd.	2020	-0.000753452	16288.6	46421.9	121.8	1.23926e+07	0.901179
Thyrocare Technologies Ltd.	2020	0.00209493	16521.9	46421.9	121.8	1.23926e+07	0.901179
Timken India Ltd.	2020	0.00149336	5007.06	46421.9	121.8	1.23926e+07	0.901179
Titan Company Ltd.	2020	0.00121029	118745	46421.9	121.8	1.23926e+07	0.901179
Torrent Pharmaceuticals Ltd.	2020	0.00161501	19387.8	46421.9	121.8	1.23926e+07	0.901179
Torrent Power Ltd.	2020	0.000383657	58896.6	46421.9	121.8	1.23926e+07	0.901179
Trent Ltd.	2020	0.000953271	29829.5	46421.9	121.8	1.23926e+07	0.901179
Trident Ltd.	2020	0.00151179	1.73903e+06	46421.9	121.8	1.23926e+07	0.901179
Triveni Turbine Ltd.	2020	-0.000713892	22685.5	46421.9	121.8	1.23926e+07	0.901179
Tube Investments Of India Ltd.	2020	0.00192434	23322	46421.9	121.8	1.23926e+07	0.901179
Tv18 Broadcast Ltd.	2020	0.00130074	526797	46421.9	121.8	1.23926e+07	0.901179
U P L Ltd.	2020	-0.000969915	286955	46421.9	121.8	1.23926e+07	0.901179
Uco Bank	2020	-0.00111648	292358	46421.9	121.8	1.23926e+07	0.901179
Uflex Ltd.	2020	0.00221293	15161.6	46421.9	121.8	1.23926e+07	0.901179
Ultratech Cement Ltd.	2020	0.000871314	24210.5	46421.9	121.8	1.23926e+07	0.901179
Union Bank Of India	2020	-0.0022126	572922	46421.9	121.8	1.23926e+07	0.901179
United Breweries Ltd.	2020	-0.000308158	29837.3	46421.9	121.8	1.23926e+07	0.901179
V I P Industries Ltd.	2020	-0.000654617	43341	46421.9	121.8	1.23926e+07	0.901179
V-Guard Industries Ltd.	2020	-0.000570558	44222.9	46421.9	121.8	1.23926e+07	0.901179
V-Mart Retail Ltd.	2020	0.00168753	9666.21	46421.9	121.8	1.23926e+07	0.901179
Vaibhav Global Ltd.	2020	0.00419775	1479.04	46421.9	121.8	1.23926e+07	0.901179
Vakrangee Ltd.	2020	0.00128783	1479.04	46421.9	121.8	1.23926e+07	0.901179
Vardhman Textiles Ltd.	2020	0.00039435	1479.04	46421.9	121.8	1.23926e+07	0.901179
Varun Beverages Ltd.	2020	0.00102393	1479.04	46421.9	121.8	1.23926e+07	0.901179
Vedanta Ltd.	2020	-0.000192783	1479.04	46421.9	121.8	1.23926e+07	0.901179
Venky'S (India) Ltd.	2020	-9.87653e-05	1479.04	46421.9	121.8	1.23926e+07	0.901179
Vinati Organics Ltd.	2020	0.000825703	9666.21	46421.9	121.8	1.23926e+07	0.901179
Vodafone Idea Ltd.	2020	0.00220117	7.4622e+07	46421.9	121.8	1.23926e+07	0.901179
Voltas Ltd.	2020	0.000894809	65553.8	46421.9	121.8	1.23926e+07	0.901179
Wabco India Ltd.	2020	-0.000674609	599.698	46421.9	121.8	1.23926e+07	0.901179
Welspun Corp Ltd.	2020	-0.000375232	183160	46421.9	121.8	1.23926e+07	0.901179
Welspun India Ltd.	2020	0.00126115	279143	46421.9	121.8	1.23926e+07	0.901179
Whirlpool Of India Ltd.	2020	0.000470236	5064.97	46421.9	121.8	1.23926e+07	0.901179
Wipro Ltd.	2020	0.00175416	475241	46421.9	121.8	1.23926e+07	0.901179
Wockhardt Ltd.	2020	0.00330246	125568	46421.9	121.8	1.23926e+07	0.901179
Yes Bank Ltd.	2020	-0.00386487	1.92679e+07	46421.9	121.8	1.23926e+07	0.901179
Zee Entertainment Enterprises Ltd.	2020	-0.00103354	1.03624e+06	46421.9	121.8	1.23926e+07	0.901179
Zensar Technologies Ltd.	2020	0.00108046	29961.3	46421.9	121.8	1.23926e+07	0.901179
Zydus Wellness Ltd.	2020	0.00118315	3092.49	46421.9	121.8	1.23926e+07	0.901179

## Sheet: 2021 BSE
Company_Name	YEAR	Adjusted_Return	Adjusted_Share Traded	Gold_Price	WPI_INDEX	GDP_YEAR	COVID Recovery
3M India Ltd.	2021	0.00072769	350.472	47450.3	134.95	1.34767e+07	0.986757
A B B India Ltd.	2021	0.00230035	14444.5	47450.3	134.95	1.34767e+07	0.986757
A C C Ltd.	2021	0.00121789	31559.8	47450.3	134.95	1.34767e+07	0.986757
A I A Engineering Ltd.	2021	-0.000327303	6327.35	47450.3	134.95	1.34767e+07	0.986757
A P L Apollo Tubes Ltd.	2021	0.00326293	63226.9	47450.3	134.95	1.34767e+07	0.986757
A U Small Finance Bank Ltd.	2021	0.000642316	79589.3	47450.3	134.95	1.34767e+07	0.986757
Aarti Drugs Ltd.	2021	-0.00123761	45685.5	47450.3	134.95	1.34767e+07	0.986757
Aarti Industries Ltd.	2021	0.00181805	59612.3	47450.3	134.95	1.34767e+07	0.986757
Abbott India Ltd.	2021	0.000874461	1531.14	47450.3	134.95	1.34767e+07	0.986757
Adani Enterprises Ltd.	2021	0.00499941	407608	47450.3	134.95	1.34767e+07	0.986757
Adani Ports & Special Economic Zone Ltd.	2021	0.00153717	633869	47450.3	134.95	1.34767e+07	0.986757
Adani Transmission Ltd.	2021	0.00551714	52674.5	47450.3	134.95	1.34767e+07	0.986757
Aditya Birla Capital Ltd.	2021	0.0013182	396422	47450.3	134.95	1.34767e+07	0.986757
Aditya Birla Fashion & Retail Ltd.	2021	0.00198061	232987	47450.3	134.95	1.34767e+07	0.986757
Advanced Enzyme Technologies Ltd.	2021	-6.25169e-05	48736.8	47450.3	134.95	1.34767e+07	0.986757
Aegis Logistics Ltd.	2021	-0.000569559	75373.3	47450.3	134.95	1.34767e+07	0.986757
Ajanta Pharma Ltd.	2021	0.00122786	6371.27	47450.3	134.95	1.34767e+07	0.986757
Alembic Pharmaceuticals Ltd.	2021	-0.00113089	28222.4	47450.3	134.95	1.34767e+07	0.986757
Alkem Laboratories Ltd.	2021	0.000804509	8986.91	47450.3	134.95	1.34767e+07	0.986757
Alkyl Amines Chemicals Ltd.	2021	0.00277967	10780.9	47450.3	134.95	1.34767e+07	0.986757
Allcargo Logistics Ltd.	2021	0.00429515	116648	47450.3	134.95	1.34767e+07	0.986757
Alok Industries Ltd.	2021	0.00046418	2.11079e+06	47450.3	134.95	1.34767e+07	0.986757
Amara Raja Batteries Ltd.	2021	-0.00167787	104113	47450.3	134.95	1.34767e+07	0.986757
Ambuja Cements Ltd.	2021	0.00161815	274709	47450.3	134.95	1.34767e+07	0.986757
Apollo Hospitals Enterprise Ltd.	2021	0.00295327	49995.7	47450.3	134.95	1.34767e+07	0.986757
Apollo Tyres Ltd.	2021	0.000604435	409091	47450.3	134.95	1.34767e+07	0.986757
Asahi India Glass Ltd.	2021	0.00211026	16057.6	47450.3	134.95	1.34767e+07	0.986757
Ashok Leyland Ltd.	2021	0.000651057	1.57992e+06	47450.3	134.95	1.34767e+07	0.986757
Asian Paints Ltd.	2021	0.000827047	107422	47450.3	134.95	1.34767e+07	0.986757
Astral Ltd.	2021	0.00213412	25348.7	47450.3	134.95	1.34767e+07	0.986757
Astrazeneca Pharma India Ltd.	2021	-0.00164081	5540.41	47450.3	134.95	1.34767e+07	0.986757
Atul Ltd.	2021	0.00135025	3856.64	47450.3	134.95	1.34767e+07	0.986757
Aurobindo Pharma Ltd.	2021	-0.00111115	151065	47450.3	134.95	1.34767e+07	0.986757
Avanti Feeds Ltd.	2021	0.000315828	40063.3	47450.3	134.95	1.34767e+07	0.986757
Avenue Supermarts Ltd.	2021	0.00191694	41670.6	47450.3	134.95	1.34767e+07	0.986757
Axis Bank Ltd.	2021	0.000332446	593674	47450.3	134.95	1.34767e+07	0.986757
B A S F India Ltd.	2021	0.00251773	5456.26	47450.3	134.95	1.34767e+07	0.986757
B E M L Ltd.	2021	0.00197247	39197.8	47450.3	134.95	1.34767e+07	0.986757
Bajaj Auto Ltd.	2021	-0.00032281	29100.3	47450.3	134.95	1.34767e+07	0.986757
Bajaj Electricals Ltd.	2021	0.00299391	24888.9	47450.3	134.95	1.34767e+07	0.986757
Bajaj Finance Ltd.	2021	0.00117265	95418	47450.3	134.95	1.34767e+07	0.986757
Bajaj Finserv Ltd.	2021	0.00246114	21145.3	47450.3	134.95	1.34767e+07	0.986757
Bajaj Holdings & Invst. Ltd.	2021	0.00220637	3088.68	47450.3	134.95	1.34767e+07	0.986757
Balaji Amines Ltd.	2021	0.00496495	17923.7	47450.3	134.95	1.34767e+07	0.986757
Balkrishna Industries Ltd.	2021	0.00132416	34034.8	47450.3	134.95	1.34767e+07	0.986757
Balrampur Chini Mills Ltd.	2021	0.00308879	141378	47450.3	134.95	1.34767e+07	0.986757
Bank Of Baroda	2021	0.000885038	3.36228e+06	47450.3	134.95	1.34767e+07	0.986757
Bank Of India	2021	7.92997e-05	808403	47450.3	134.95	1.34767e+07	0.986757
Bank Of Maharashtra	2021	0.00136684	1.38056e+06	47450.3	134.95	1.34767e+07	0.986757
Bata India Ltd.	2021	0.000651093	42186.6	47450.3	134.95	1.34767e+07	0.986757
Bayer Cropscience Ltd.	2021	-0.000485782	2563.3	47450.3	134.95	1.34767e+07	0.986757
Berger Paints India Ltd.	2021	-3.46052e-05	58054.5	47450.3	134.95	1.34767e+07	0.986757
Bharat Electronics Ltd.	2021	0.00188558	777788	47450.3	134.95	1.34767e+07	0.986757
Bharat Forge Ltd.	2021	0.000940566	115594	47450.3	134.95	1.34767e+07	0.986757
Bharat Heavy Electricals Ltd.	2021	0.00149875	5.71969e+06	47450.3	134.95	1.34767e+07	0.986757
Bharat Petroleum Corpn. Ltd.	2021	-0.000101225	505957	47450.3	134.95	1.34767e+07	0.986757
Bharti Airtel Ltd.	2021	0.00120156	690086	47450.3	134.95	1.34767e+07	0.986757
Biocon Ltd.	2021	-0.00100371	219188	47450.3	134.95	1.34767e+07	0.986757
Birla Corporation Ltd.	2021	0.00264885	16269.6	47450.3	134.95	1.34767e+07	0.986757
Birlasoft Ltd.	2021	0.00307748	183441	47450.3	134.95	1.34767e+07	0.986757
Blue Dart Express Ltd.	2021	0.00179898	2217.77	47450.3	134.95	1.34767e+07	0.986757
Blue Star Ltd.	2021	0.000923914	8919.6	47450.3	134.95	1.34767e+07	0.986757
Bombay Burmah Trdg. Corpn. Ltd.	2021	-0.000636465	10690.5	47450.3	134.95	1.34767e+07	0.986757
Bosch Ltd.	2021	0.00105195	83668.1	47450.3	134.95	1.34767e+07	0.986757
Brigade Enterprises Ltd.	2021	0.00267223	33055.8	47450.3	134.95	1.34767e+07	0.986757
Brightcom Group Ltd.	2021	0.0127755	1.65672e+06	47450.3	134.95	1.34767e+07	0.986757
Britannia Industries Ltd.	2021	5.91259e-05	28089	47450.3	134.95	1.34767e+07	0.986757
C C L Products (India) Ltd.	2021	0.00188027	41312.6	47450.3	134.95	1.34767e+07	0.986757
C E S C Ltd.	2021	0.00135739	132416	47450.3	134.95	1.34767e+07	0.986757
Cadila Healthcare Ltd.	2021	-2.32911e-05	271089	47450.3	134.95	1.34767e+07	0.986757
Can Fin Homes Ltd.	2021	0.000469518	54013.5	47450.3	134.95	1.34767e+07	0.986757
Canara Bank	2021	0.00161281	1.17502e+06	47450.3	134.95	1.34767e+07	0.986757
Caplin Point Laboratories Ltd.	2021	0.00211992	28491	47450.3	134.95	1.34767e+07	0.986757
Carborundum Universal Ltd.	2021	0.00358603	24348.5	47450.3	134.95	1.34767e+07	0.986757
Castrol India Ltd.	2021	-9.83478e-06	114979	47450.3	134.95	1.34767e+07	0.986757
Ceat Ltd.	2021	0.000278387	16361.1	47450.3	134.95	1.34767e+07	0.986757
Central Bank Of India	2021	0.00164539	1.97121e+06	47450.3	134.95	1.34767e+07	0.986757
Century Plyboards (India) Ltd.	2021	0.00366409	26772	47450.3	134.95	1.34767e+07	0.986757
Century Textiles & Inds. Ltd.	2021	0.00317496	65735.5	47450.3	134.95	1.34767e+07	0.986757
Cera Sanitaryware Ltd.	2021	0.00127476	2789.91	47450.3	134.95	1.34767e+07	0.986757
Chambal Fertilisers & Chemicals Ltd.	2021	0.0021309	143075	47450.3	134.95	1.34767e+07	0.986757
Cholamandalam Financial Holdings Ltd.	2021	0.00044335	5561.11	47450.3	134.95	1.34767e+07	0.986757
Cholamandalam Investment & Finance Co. Ltd.	2021	0.000647031	185414	47450.3	134.95	1.34767e+07	0.986757
Cipla Ltd.	2021	0.000509319	233705	47450.3	134.95	1.34767e+07	0.986757
City Union Bank Ltd.	2021	-0.00112638	151347	47450.3	134.95	1.34767e+07	0.986757
Coal India Ltd.	2021	0.000250584	984475	47450.3	134.95	1.34767e+07	0.986757
Cochin Shipyard Ltd.	2021	-0.000279367	25623.6	47450.3	134.95	1.34767e+07	0.986757
Coforge Ltd.	2021	0.00294303	47970.3	47450.3	134.95	1.34767e+07	0.986757
Colgate-Palmolive (India) Ltd.	2021	-0.000253539	30701.5	47450.3	134.95	1.34767e+07	0.986757
Container Corpn. Of India Ltd.	2021	0.00160194	134118	47450.3	134.95	1.34767e+07	0.986757
Coromandel International Ltd.	2021	-0.000337422	41185.1	47450.3	134.95	1.34767e+07	0.986757
Crisil Ltd.	2021	0.00158184	5297.47	47450.3	134.95	1.34767e+07	0.986757
Crompton Greaves Consumer Electricals Ltd.	2021	0.000632586	395760	47450.3	134.95	1.34767e+07	0.986757
Cummins India Ltd.	2021	0.00176141	78218.3	47450.3	134.95	1.34767e+07	0.986757
Cyient Ltd.	2021	0.00268936	37589.2	47450.3	134.95	1.34767e+07	0.986757
D C M Shriram Ltd.	2021	0.00356498	22038.8	47450.3	134.95	1.34767e+07	0.986757
D L F Ltd.	2021	0.00189022	698542	47450.3	134.95	1.34767e+07	0.986757
Dabur India Ltd.	2021	0.000265983	167219	47450.3	134.95	1.34767e+07	0.986757
Deepak Nitrite Ltd.	2021	0.00354215	96170.1	47450.3	134.95	1.34767e+07	0.986757
Delta Corp Ltd.	2021	0.00191612	455804	47450.3	134.95	1.34767e+07	0.986757
Dilip Buildcon Ltd.	2021	0.000458063	46068.9	47450.3	134.95	1.34767e+07	0.986757
Divi'S Laboratories Ltd.	2021	0.000772176	36494.9	47450.3	134.95	1.34767e+07	0.986757
Dixon Technologies (India) Ltd.	2021	0.00279458	25610.5	47450.3	134.95	1.34767e+07	0.986757
Dr. Lal Pathlabs Ltd.	2021	0.00187955	15873.2	47450.3	134.95	1.34767e+07	0.986757
Dr. Reddy'S Laboratories Ltd.	2021	-0.000287297	44688	47450.3	134.95	1.34767e+07	0.986757
E I D-Parry (India) Ltd.	2021	0.00114708	53220.3	47450.3	134.95	1.34767e+07	0.986757
E I H Ltd.	2021	0.00104354	92839.3	47450.3	134.95	1.34767e+07	0.986757
E P L Ltd.	2021	-0.000934113	50413.4	47450.3	134.95	1.34767e+07	0.986757
Eclerx Services Ltd.	2021	0.00436544	7145.66	47450.3	134.95	1.34767e+07	0.986757
Edelweiss Financial Services Ltd.	2021	0.0001282	325783	47450.3	134.95	1.34767e+07	0.986757
Eicher Motors Ltd.	2021	-0.00010253	49474.8	47450.3	134.95	1.34767e+07	0.986757
Elgi Equipments Ltd.	2021	0.00252653	46110.3	47450.3	134.95	1.34767e+07	0.986757
Emami Ltd.	2021	0.000813685	77855.9	47450.3	134.95	1.34767e+07	0.986757
Endurance Technologies Ltd.	2021	0.000655732	13652.4	47450.3	134.95	1.34767e+07	0.986757
Engineers India Ltd.	2021	-0.000500789	269255	47450.3	134.95	1.34767e+07	0.986757
Equitas Holdings Ltd.	2021	0.00193978	239158	47450.3	134.95	1.34767e+07	0.986757
Eris Lifesciences Ltd.	2021	0.00106324	10557.7	47450.3	134.95	1.34767e+07	0.986757
Escorts Ltd.	2021	0.00150614	91663.8	47450.3	134.95	1.34767e+07	0.986757
Exide Industries Ltd.	2021	-0.000623972	323603	47450.3	134.95	1.34767e+07	0.986757
F D C Ltd.	2021	-0.000384737	21078.2	47450.3	134.95	1.34767e+07	0.986757
Federal Bank Ltd.	2021	0.000655318	1.50072e+06	47450.3	134.95	1.34767e+07	0.986757
Finolex Cables Ltd.	2021	0.00160111	25909.6	47450.3	134.95	1.34767e+07	0.986757
Finolex Industries Ltd.	2021	0.001845	107804	47450.3	134.95	1.34767e+07	0.986757
Firstsource Solutions Ltd.	2021	0.0023829	410253	47450.3	134.95	1.34767e+07	0.986757
Fortis Healthcare Ltd.	2021	0.00260355	277230	47450.3	134.95	1.34767e+07	0.986757
G A I L (India) Ltd.	2021	3.76263e-05	1.13616e+06	47450.3	134.95	1.34767e+07	0.986757
G M M Pfaudler Ltd.	2021	0.00108759	6860.51	47450.3	134.95	1.34767e+07	0.986757
Garware Technical Fibres Ltd.	2021	0.00125738	2189.18	47450.3	134.95	1.34767e+07	0.986757
General Insurance Corpn. Of India	2021	-3.57029e-05	90409	47450.3	134.95	1.34767e+07	0.986757
Glaxosmithkline Pharmaceuticals Ltd.	2021	0.000389369	4932.77	47450.3	134.95	1.34767e+07	0.986757
Glenmark Pharmaceuticals Ltd.	2021	0.000106729	138010	47450.3	134.95	1.34767e+07	0.986757
Godfrey Phillips India Ltd.	2021	0.00053984	10114	47450.3	134.95	1.34767e+07	0.986757
Godrej Agrovet Ltd.	2021	-0.000179444	47518.9	47450.3	134.95	1.34767e+07	0.986757
Godrej Consumer Products Ltd.	2021	0.000988756	79485.2	47450.3	134.95	1.34767e+07	0.986757
Godrej Industries Ltd.	2021	0.00156802	88034.8	47450.3	134.95	1.34767e+07	0.986757
Godrej Properties Ltd.	2021	0.00115438	60485.6	47450.3	134.95	1.34767e+07	0.986757
Granules India Ltd.	2021	-0.000281994	196506	47450.3	134.95	1.34767e+07	0.986757
Graphite India Ltd.	2021	0.00190304	147725	47450.3	134.95	1.34767e+07	0.986757
Grasim Industries Ltd.	2021	0.00210205	125208	47450.3	134.95	1.34767e+07	0.986757
Great Eastern Shipping Co. Ltd.	2021	0.000261409	44054.4	47450.3	134.95	1.34767e+07	0.986757
Grindwell Norton Ltd.	2021	0.00395622	12452.3	47450.3	134.95	1.34767e+07	0.986757
Gujarat Alkalies & Chemicals Ltd.	2021	0.002507	47566	47450.3	134.95	1.34767e+07	0.986757
Gujarat Gas Ltd.	2021	0.00209388	129752	47450.3	134.95	1.34767e+07	0.986757
Gujarat Narmada Valley Fertilizers & Chemicals Ltd.	2021	0.00269689	105554	47450.3	134.95	1.34767e+07	0.986757
Gujarat Pipavav Port Ltd.	2021	0.000190471	90827.4	47450.3	134.95	1.34767e+07	0.986757
Gujarat State Fertilizers & Chemicals Ltd.	2021	0.00160847	220005	47450.3	134.95	1.34767e+07	0.986757
Gujarat State Petronet Ltd.	2021	0.00119594	81163.6	47450.3	134.95	1.34767e+07	0.986757
H C L Technologies Ltd.	2021	0.00119791	327770	47450.3	134.95	1.34767e+07	0.986757
H D F C Bank Ltd.	2021	0.000177278	305268	47450.3	134.95	1.34767e+07	0.986757
H D F C Life Insurance Co. Ltd.	2021	-0.000282587	609000	47450.3	134.95	1.34767e+07	0.986757
H E G Ltd.	2021	0.0024997	32067.1	47450.3	134.95	1.34767e+07	0.986757
H F C L Ltd.	2021	0.00433126	1.88178e+06	47450.3	134.95	1.34767e+07	0.986757
Hathway Cable & Datacom Ltd.	2021	-0.00163494	712589	47450.3	134.95	1.34767e+07	0.986757
Hatsun Agro Products Ltd.	2021	0.00226187	9459.03	47450.3	134.95	1.34767e+07	0.986757
Havells India Ltd.	2021	0.00168489	105057	47450.3	134.95	1.34767e+07	0.986757
Hero Motocorp Ltd.	2021	-0.000856785	37454.4	47450.3	134.95	1.34767e+07	0.986757
Hikal Ltd.	2021	0.00450562	85564.1	47450.3	134.95	1.34767e+07	0.986757
Hindalco Industries Ltd.	2021	0.00252841	621945	47450.3	134.95	1.34767e+07	0.986757
Hindustan Copper Ltd.	2021	0.00279333	598598	47450.3	134.95	1.34767e+07	0.986757
Hindustan Petroleum Corpn. Ltd.	2021	0.00108702	297808	47450.3	134.95	1.34767e+07	0.986757
Hindustan Unilever Ltd.	2021	-0.000112477	111585	47450.3	134.95	1.34767e+07	0.986757
Hindustan Zinc Ltd.	2021	0.00105201	136016	47450.3	134.95	1.34767e+07	0.986757
Honeywell Automation India Ltd.	2021	0.000583488	522.335	47450.3	134.95	1.34767e+07	0.986757
Housing & Urban Devp. Corpn. Ltd.	2021	-0.000216651	369406	47450.3	134.95	1.34767e+07	0.986757
Housing Development Finance Corpn. Ltd.	2021	1.17076e-05	158208	47450.3	134.95	1.34767e+07	0.986757
I C I C I Bank Ltd.	2021	0.00133469	832266	47450.3	134.95	1.34767e+07	0.986757
I C I C I Lombard General Insurance Co. Ltd.	2021	-0.000407679	107461	47450.3	134.95	1.34767e+07	0.986757
I C I C I Prudential Life Insurance Co. Ltd.	2021	0.000431554	103612	47450.3	134.95	1.34767e+07	0.986757
I D B I Bank Ltd.	2021	0.00149824	1.91416e+06	47450.3	134.95	1.34767e+07	0.986757
I D F C First Bank Ltd.	2021	0.000913347	2.9399e+06	47450.3	134.95	1.34767e+07	0.986757
I D F C Ltd.	2021	0.00216334	1.10942e+06	47450.3	134.95	1.34767e+07	0.986757
I F B Industries Ltd.	2021	-0.000284344	5093.77	47450.3	134.95	1.34767e+07	0.986757
I I F L Finance Ltd.	2021	0.00356355	247943	47450.3	134.95	1.34767e+07	0.986757
I R B Infrastructure Developers Ltd.	2021	0.00266654	233550	47450.3	134.95	1.34767e+07	0.986757
I T C Ltd.	2021	8.59949e-05	1.69047e+06	47450.3	134.95	1.34767e+07	0.986757
I T I Ltd.	2021	-0.000361976	70239.4	47450.3	134.95	1.34767e+07	0.986757
India Cements Ltd.	2021	0.000348183	252177	47450.3	134.95	1.34767e+07	0.986757
Indiabulls Housing Finance Ltd.	2021	-5.05475e-05	1.37764e+06	47450.3	134.95	1.34767e+07	0.986757
Indiabulls Real Estate Ltd.	2021	0.00269011	1.16448e+06	47450.3	134.95	1.34767e+07	0.986757
Indian Bank	2021	0.0018281	307885	47450.3	134.95	1.34767e+07	0.986757
Indian Energy Exchange Ltd.	2021	0.00482876	530647	47450.3	134.95	1.34767e+07	0.986757
Indian Hotels Co. Ltd.	2021	0.00156555	436188	47450.3	134.95	1.34767e+07	0.986757
Indian Oil Corpn. Ltd.	2021	0.000698823	1.34004e+06	47450.3	134.95	1.34767e+07	0.986757
Indian Overseas Bank	2021	0.00237485	2.26496e+06	47450.3	134.95	1.34767e+07	0.986757
Indoco Remedies Ltd.	2021	0.00149606	24340.6	47450.3	134.95	1.34767e+07	0.986757
Indraprastha Gas Ltd.	2021	-0.000299404	140013	47450.3	134.95	1.34767e+07	0.986757
Indus Towers Ltd.	2021	0.000106237	264876	47450.3	134.95	1.34767e+07	0.986757
Indusind Bank Ltd.	2021	-4.4723e-05	356186	47450.3	134.95	1.34767e+07	0.986757
Infibeam Avenues Ltd.	2021	-0.000311893	861201	47450.3	134.95	1.34767e+07	0.986757
Info Edge (India) Ltd.	2021	0.00056906	34991.1	47450.3	134.95	1.34767e+07	0.986757
Infosys Ltd.	2021	0.00154385	437726	47450.3	134.95	1.34767e+07	0.986757
Inox Leisure Ltd.	2021	0.000605252	60259.7	47450.3	134.95	1.34767e+07	0.986757
Intellect Design Arena Ltd.	2021	0.0034498	55569.3	47450.3	134.95	1.34767e+07	0.986757
Interglobe Aviation Ltd.	2021	0.000586677	65710.9	47450.3	134.95	1.34767e+07	0.986757
Ipca Laboratories Ltd.	2021	4.17518e-06	17639.5	47450.3	134.95	1.34767e+07	0.986757
J B Chemicals & Pharmaceuticals Ltd.	2021	0.00217584	11382.1	47450.3	134.95	1.34767e+07	0.986757
J K Cement Ltd.	2021	0.00219732	8104.16	47450.3	134.95	1.34767e+07	0.986757
J K Lakshmi Cement Ltd.	2021	0.00208527	42473.2	47450.3	134.95	1.34767e+07	0.986757
J K Paper Ltd.	2021	0.00208543	163601	47450.3	134.95	1.34767e+07	0.986757
J M Financial Ltd.	2021	-0.000617312	188368	47450.3	134.95	1.34767e+07	0.986757
J S W Energy Ltd.	2021	0.00600759	346937	47450.3	134.95	1.34767e+07	0.986757
J S W Steel Ltd.	2021	0.001963	453907	47450.3	134.95	1.34767e+07	0.986757
Jamna Auto Inds. Ltd.	2021	0.00215218	143487	47450.3	134.95	1.34767e+07	0.986757
Jindal Stainless (Hisar) Ltd.	2021	0.00347866	87018.4	47450.3	134.95	1.34767e+07	0.986757
Jindal Stainless Ltd.	2021	0.00347799	234289	47450.3	134.95	1.34767e+07	0.986757
Jindal Steel & Power Ltd.	2021	0.00109394	631741	47450.3	134.95	1.34767e+07	0.986757
Jubilant Foodworks Ltd.	2021	0.00107813	35380	47450.3	134.95	1.34767e+07	0.986757
Jubilant Pharmova Ltd.	2021	-0.00165595	25946.2	47450.3	134.95	1.34767e+07	0.986757
Just Dial Ltd.	2021	0.000813232	175216	47450.3	134.95	1.34767e+07	0.986757
Jyothy Labs Ltd.	2021	-0.000261239	56668.4	47450.3	134.95	1.34767e+07	0.986757
K E C International Ltd.	2021	0.000967265	27336.7	47450.3	134.95	1.34767e+07	0.986757
K N R Constructions Ltd.	2021	0.0023615	70455.1	47450.3	134.95	1.34767e+07	0.986757
K P R Mill Ltd.	2021	0.00540977	16036.1	47450.3	134.95	1.34767e+07	0.986757
K R B L Ltd.	2021	-8.05328e-05	100225	47450.3	134.95	1.34767e+07	0.986757
Kajaria Ceramics Ltd.	2021	0.00241177	35167	47450.3	134.95	1.34767e+07	0.986757
Kalpataru Power Transmission Ltd.	2021	0.000626155	53817.5	47450.3	134.95	1.34767e+07	0.986757
Kansai Nerolac Paints Ltd.	2021	-0.000190699	23692	47450.3	134.95	1.34767e+07	0.986757
Kei Industries Ltd.	2021	0.00362196	47758.3	47450.3	134.95	1.34767e+07	0.986757
Kotak Mahindra Bank Ltd.	2021	-0.000363692	223474	47450.3	134.95	1.34767e+07	0.986757
L & T Finance Holdings Ltd.	2021	-0.000610886	1.00077e+06	47450.3	134.95	1.34767e+07	0.986757
L & T Technology Services Ltd.	2021	0.00332768	20907.3	47450.3	134.95	1.34767e+07	0.986757
L I C Housing Finance Ltd.	2021	-0.000130439	225094	47450.3	134.95	1.34767e+07	0.986757
Lakshmi Machine Works Ltd.	2021	0.00244304	1855.84	47450.3	134.95	1.34767e+07	0.986757
Larsen & Toubro Infotech Ltd.	2021	0.00260013	20893.7	47450.3	134.95	1.34767e+07	0.986757
Larsen & Toubro Ltd.	2021	0.00147592	158986	47450.3	134.95	1.34767e+07	0.986757
Laurus Labs Ltd.	2021	0.00163906	246308	47450.3	134.95	1.34767e+07	0.986757
Linde India Ltd.	2021	0.00373119	11000.9	47450.3	134.95	1.34767e+07	0.986757
Lupin Ltd.	2021	-0.000308167	131640	47450.3	134.95	1.34767e+07	0.986757
Lux Industries Ltd.	2021	0.00322289	5412.55	47450.3	134.95	1.34767e+07	0.986757
M M T C Ltd.	2021	0.00157172	660897	47450.3	134.95	1.34767e+07	0.986757
M O I L Ltd.	2021	0.00051654	79270.6	47450.3	134.95	1.34767e+07	0.986757
M R F Ltd.	2021	-0.000272411	1210.06	47450.3	134.95	1.34767e+07	0.986757
Mahanagar Gas Ltd.	2021	-0.000914365	38831.1	47450.3	134.95	1.34767e+07	0.986757
Mahindra & Mahindra Financial Services Ltd.	2021	-0.000881328	612059	47450.3	134.95	1.34767e+07	0.986757
Mahindra & Mahindra Ltd.	2021	0.000449907	206008	47450.3	134.95	1.34767e+07	0.986757
Mahindra C I E Automotive Ltd.	2021	0.00114973	76124.7	47450.3	134.95	1.34767e+07	0.986757
Mahindra Holidays & Resorts India Ltd.	2021	0.00117562	36685.3	47450.3	134.95	1.34767e+07	0.986757
Mahindra Logistics Ltd.	2021	0.00190439	19750.1	47450.3	134.95	1.34767e+07	0.986757
Manappuram Finance Ltd.	2021	-0.000178495	395751	47450.3	134.95	1.34767e+07	0.986757
Mangalore Refinery & Petrochemicals Ltd.	2021	0.000697035	307406	47450.3	134.95	1.34767e+07	0.986757
Marico Ltd.	2021	0.000830813	145323	47450.3	134.95	1.34767e+07	0.986757
Maruti Suzuki India Ltd.	2021	-0.00014535	45007.1	47450.3	134.95	1.34767e+07	0.986757
Mastek Ltd.	2021	0.00360497	28682.4	47450.3	134.95	1.34767e+07	0.986757
Max Financial Services Ltd.	2021	0.00141232	48500	47450.3	134.95	1.34767e+07	0.986757
Minda Industries Ltd.	2021	0.00446575	33193.2	47450.3	134.95	1.34767e+07	0.986757
Mindtree Ltd.	2021	0.00419645	53387	47450.3	134.95	1.34767e+07	0.986757
Motilal Oswal Financial Services Ltd.	2021	0.00158103	37246.2	47450.3	134.95	1.34767e+07	0.986757
Mphasis Ltd.	2021	0.00324826	28804.9	47450.3	134.95	1.34767e+07	0.986757
Multi Commodity Exchange Of India Ltd.	2021	-0.000483715	40408.5	47450.3	134.95	1.34767e+07	0.986757
Muthoot Finance Ltd.	2021	0.000741378	59803.3	47450.3	134.95	1.34767e+07	0.986757
N B C C (India) Ltd.	2021	0.00161091	1.17352e+06	47450.3	134.95	1.34767e+07	0.986757
N C C Ltd.	2021	0.000388045	594001	47450.3	134.95	1.34767e+07	0.986757
N H P C Ltd.	2021	0.000925914	925067	47450.3	134.95	1.34767e+07	0.986757
N L C India Ltd.	2021	0.000402878	589476	47450.3	134.95	1.34767e+07	0.986757
N M D C Ltd.	2021	0.000348655	928164	47450.3	134.95	1.34767e+07	0.986757
N T P C Ltd.	2021	0.000922934	972400	47450.3	134.95	1.34767e+07	0.986757
Narayana Hrudayalaya Ltd.	2021	0.00145302	20859.6	47450.3	134.95	1.34767e+07	0.986757
Natco Pharma Ltd.	2021	-0.000275401	25093.2	47450.3	134.95	1.34767e+07	0.986757
National Aluminium Co. Ltd.	2021	0.00306773	2.58187e+06	47450.3	134.95	1.34767e+07	0.986757
Navin Fluorine Intl. Ltd.	2021	0.00185911	18822.9	47450.3	134.95	1.34767e+07	0.986757
Nesco Ltd.	2021	0.000172696	9534.69	47450.3	134.95	1.34767e+07	0.986757
Nestle India Ltd.	2021	0.0002796	4134.01	47450.3	134.95	1.34767e+07	0.986757
Network18 Media & Invst. Ltd.	2021	0.0036185	307949	47450.3	134.95	1.34767e+07	0.986757
New India Assurance Co. Ltd.	2021	0.000314128	78714	47450.3	134.95	1.34767e+07	0.986757
Nippon Life India Asset Mgmt. Ltd.	2021	0.000489137	71626.8	47450.3	134.95	1.34767e+07	0.986757
Nocil Ltd.	2021	0.00149386	148413	47450.3	134.95	1.34767e+07	0.986757
Oberoi Realty Ltd.	2021	0.00153597	66791.7	47450.3	134.95	1.34767e+07	0.986757
Oil & Natural Gas Corpn. Ltd.	2021	0.00154876	1.67422e+06	47450.3	134.95	1.34767e+07	0.986757
Oil India Ltd.	2021	0.00229809	118078	47450.3	134.95	1.34767e+07	0.986757
Oracle Financial Services Software Ltd.	2021	0.000652958	8028.25	47450.3	134.95	1.34767e+07	0.986757
P C B L Ltd.	2021	0.00120541	194401	47450.3	134.95	1.34767e+07	0.986757
P I Industries Ltd.	2021	0.00119096	23716.3	47450.3	134.95	1.34767e+07	0.986757
P N B Housing Finance Ltd.	2021	0.0011351	29281.1	47450.3	134.95	1.34767e+07	0.986757
P N C Infratech Ltd.	2021	0.00152361	207015	47450.3	134.95	1.34767e+07	0.986757
P V R Ltd.	2021	-0.00030063	103973	47450.3	134.95	1.34767e+07	0.986757
Page Industries Ltd.	2021	0.0014075	1471.66	47450.3	134.95	1.34767e+07	0.986757
Persistent Systems Ltd.	2021	0.00472273	16399.6	47450.3	134.95	1.34767e+07	0.986757
Petronet L N G Ltd.	2021	-0.000621709	194314	47450.3	134.95	1.34767e+07	0.986757
Pfizer Ltd.	2021	-0.000133663	5353.43	47450.3	134.95	1.34767e+07	0.986757
Phoenix Mills Ltd.	2021	0.00097836	14064.9	47450.3	134.95	1.34767e+07	0.986757
Pidilite Industries Ltd.	2021	0.00129935	37075.5	47450.3	134.95	1.34767e+07	0.986757
Piramal Enterprises Ltd.	2021	0.00234227	71866.4	47450.3	134.95	1.34767e+07	0.986757
Poly Medicure Ltd.	2021	0.00255078	24193.8	47450.3	134.95	1.34767e+07	0.986757
Poonawalla Fincorp Ltd.	2021	0.00672849	610583	47450.3	134.95	1.34767e+07	0.986757
Power Finance Corpn. Ltd.	2021	3.38137e-05	447879	47450.3	134.95	1.34767e+07	0.986757
Power Grid Corpn. Of India Ltd.	2021	0.0014897	628241	47450.3	134.95	1.34767e+07	0.986757
Praj Industries Ltd.	2021	0.00411335	180380	47450.3	134.95	1.34767e+07	0.986757
Prestige Estates Projects Ltd.	2021	0.00223492	79642.6	47450.3	134.95	1.34767e+07	0.986757
Prism Johnson Ltd.	2021	0.00162021	50394	47450.3	134.95	1.34767e+07	0.986757
Procter & Gamble Health Ltd.	2021	-0.00112408	1108.86	47450.3	134.95	1.34767e+07	0.986757
Procter & Gamble Hygiene & Health Care Ltd.	2021	0.00136866	1096.62	47450.3	134.95	1.34767e+07	0.986757
Punjab National Bank	2021	0.000193763	7.50007e+06	47450.3	134.95	1.34767e+07	0.986757
Quess Corp Ltd.	2021	0.00192219	66383.7	47450.3	134.95	1.34767e+07	0.986757
R B L Bank Ltd.	2021	-0.00255802	842074	47450.3	134.95	1.34767e+07	0.986757
R E C Ltd.	2021	-0.000102615	365425	47450.3	134.95	1.34767e+07	0.986757
R H I Magnesita India Ltd.	2021	0.00157519	21085.1	47450.3	134.95	1.34767e+07	0.986757
Radico Khaitan Ltd.	2021	0.00396525	61541.6	47450.3	134.95	1.34767e+07	0.986757
Rain Industries Ltd.	2021	0.00198098	341245	47450.3	134.95	1.34767e+07	0.986757
Rajesh Exports Ltd.	2021	0.00169858	65044.5	47450.3	134.95	1.34767e+07	0.986757
Rallis India Ltd.	2021	-0.000116738	69077.8	47450.3	134.95	1.34767e+07	0.986757
Ramco Cements Ltd.	2021	0.000928974	36435.2	47450.3	134.95	1.34767e+07	0.986757
Rashtriya Chemicals & Fertilizers Ltd.	2021	0.00136257	537218	47450.3	134.95	1.34767e+07	0.986757
Ratnamani Metals & Tubes Ltd.	2021	0.00067919	3575.49	47450.3	134.95	1.34767e+07	0.986757
Redington (India) Ltd.	2021	0.0031045	173714	47450.3	134.95	1.34767e+07	0.986757
Relaxo Footwears Ltd.	2021	0.00180229	21284.5	47450.3	134.95	1.34767e+07	0.986757
Reliance Industries Ltd.	2021	0.000700193	534815	47450.3	134.95	1.34767e+07	0.986757
S B I Life Insurance Co. Ltd.	2021	0.00109155	644249	47450.3	134.95	1.34767e+07	0.986757
S I S Ltd.	2021	0.000327249	44767.3	47450.3	134.95	1.34767e+07	0.986757
S J V N Ltd.	2021	0.000725969	322545	47450.3	134.95	1.34767e+07	0.986757
S K F India Ltd.	2021	0.00309561	4382.9	47450.3	134.95	1.34767e+07	0.986757
S R F Ltd.	2021	0.00304873	21158.2	47450.3	134.95	1.34767e+07	0.986757
Sanofi India Ltd.	2021	-0.000215253	2039.41	47450.3	134.95	1.34767e+07	0.986757
Saregama India Ltd.	2021	0.00744343	4053.55	47450.3	134.95	1.34767e+07	0.986757
Schaeffler India Ltd.	2021	0.002567	1088.19	47450.3	134.95	1.34767e+07	0.986757
Sequent Scientific Ltd.	2021	-0.00047131	252658	47450.3	134.95	1.34767e+07	0.986757
Sheela Foam Ltd.	2021	0.00228186	2181.2	47450.3	134.95	1.34767e+07	0.986757
Shilpa Medicare Ltd.	2021	0.000662647	57308.2	47450.3	134.95	1.34767e+07	0.986757
Shipping Corpn. Of India Ltd.	2021	0.00159405	328004	47450.3	134.95	1.34767e+07	0.986757
Shree Cement Ltd.	2021	0.00047136	1860.13	47450.3	134.95	1.34767e+07	0.986757
Shriram City Union Finance Ltd.	2021	0.00198626	4505.47	47450.3	134.95	1.34767e+07	0.986757
Shriram Transport Finance Co. Ltd.	2021	0.000496395	111688	47450.3	134.95	1.34767e+07	0.986757
Siemens Ltd.	2021	0.00158171	26836.4	47450.3	134.95	1.34767e+07	0.986757
Sobha Ltd.	2021	0.00323123	35845.6	47450.3	134.95	1.34767e+07	0.986757
Solar Industries India Ltd.	2021	0.00319267	4750.61	47450.3	134.95	1.34767e+07	0.986757
Sonata Software Ltd.	2021	0.00321739	41973.7	47450.3	134.95	1.34767e+07	0.986757
State Bank Of India	2021	0.00199061	2.00348e+06	47450.3	134.95	1.34767e+07	0.986757
Steel Authority Of India Ltd.	2021	0.00121368	4.08637e+06	47450.3	134.95	1.34767e+07	0.986757
Sterlite Technologies Ltd.	2021	0.00155488	82747	47450.3	134.95	1.34767e+07	0.986757
Strides Pharma Science Ltd.	2021	-0.00298756	71116.1	47450.3	134.95	1.34767e+07	0.986757
Sudarshan Chemical Inds. Ltd.	2021	0.000562036	38062.6	47450.3	134.95	1.34767e+07	0.986757
Sun Pharma Advanced Research Co. Ltd.	2021	0.00137042	130891	47450.3	134.95	1.34767e+07	0.986757
Sun Pharmaceutical Inds. Ltd.	2021	0.00135412	267285	47450.3	134.95	1.34767e+07	0.986757
Sun T V Network Ltd.	2021	3.8071e-05	141815	47450.3	134.95	1.34767e+07	0.986757
Sundram Fasteners Ltd.	2021	0.00207897	13072.3	47450.3	134.95	1.34767e+07	0.986757
Sunteck Realty Ltd.	2021	0.00133185	68899.3	47450.3	134.95	1.34767e+07	0.986757
Supreme Industries Ltd.	2021	0.00103338	10836	47450.3	134.95	1.34767e+07	0.986757
Supreme Petrochem Ltd.	2021	0.00274346	12446.2	47450.3	134.95	1.34767e+07	0.986757
Suzlon Energy Ltd.	2021	0.00145162	1.50035e+07	47450.3	134.95	1.34767e+07	0.986757
Symphony Ltd.	2021	-0.000134507	7568.15	47450.3	134.95	1.34767e+07	0.986757
Syngene International Ltd.	2021	-0.000112273	59711.4	47450.3	134.95	1.34767e+07	0.986757
T C I Express Ltd.	2021	0.00340952	8144.8	47450.3	134.95	1.34767e+07	0.986757
T T K Prestige Ltd.	2021	0.00179942	2702.21	47450.3	134.95	1.34767e+07	0.986757
T V S Motor Co. Ltd.	2021	0.000948211	133881	47450.3	134.95	1.34767e+07	0.986757
Tanla Platforms Ltd.	2021	0.00414033	47622.6	47450.3	134.95	1.34767e+07	0.986757
Tata Chemicals Ltd.	2021	0.00242938	282611	47450.3	134.95	1.34767e+07	0.986757
Tata Coffee Ltd.	2021	0.00271814	353848	47450.3	134.95	1.34767e+07	0.986757
Tata Communications Ltd.	2021	0.00111651	45284.4	47450.3	134.95	1.34767e+07	0.986757
Tata Consultancy Services Ltd.	2021	0.000833195	155535	47450.3	134.95	1.34767e+07	0.986757
Tata Consumer Products Ltd.	2021	0.00083834	207742	47450.3	134.95	1.34767e+07	0.986757
Tata Elxsi Ltd.	2021	0.00459116	32060.5	47450.3	134.95	1.34767e+07	0.986757
Tata Investment Corpn. Ltd.	2021	0.00112253	7961.15	47450.3	134.95	1.34767e+07	0.986757
Tata Motors Ltd.	2021	0.00373125	3.52456e+06	47450.3	134.95	1.34767e+07	0.986757
Tata Power Co. Ltd.	2021	0.00413348	4.47371e+06	47450.3	134.95	1.34767e+07	0.986757
Tata Steel Ltd.	2021	0.00190644	784415	47450.3	134.95	1.34767e+07	0.986757
Tata Teleservices (Maharashtra) Ltd.	2021	0.0131576	1.57238e+06	47450.3	134.95	1.34767e+07	0.986757
Teamlease Services Ltd.	2021	0.00171678	3780.5	47450.3	134.95	1.34767e+07	0.986757
Tech Mahindra Ltd.	2021	0.00234244	173764	47450.3	134.95	1.34767e+07	0.986757
Thermax Ltd.	2021	0.0026753	6664.34	47450.3	134.95	1.34767e+07	0.986757
Thyrocare Technologies Ltd.	2021	0.00067324	20113.4	47450.3	134.95	1.34767e+07	0.986757
Timken India Ltd.	2021	0.0016569	5598.69	47450.3	134.95	1.34767e+07	0.986757
Titan Company Ltd.	2021	0.00196522	88060.7	47450.3	134.95	1.34767e+07	0.986757
Torrent Pharmaceuticals Ltd.	2021	0.00064546	13925.5	47450.3	134.95	1.34767e+07	0.986757
Torrent Power Ltd.	2021	0.00220725	84512.9	47450.3	134.95	1.34767e+07	0.986757
Trent Ltd.	2021	0.00181595	52700.9	47450.3	134.95	1.34767e+07	0.986757
Trident Ltd.	2021	0.00573377	5.23798e+06	47450.3	134.95	1.34767e+07	0.986757
Triveni Turbine Ltd.	2021	0.00340414	66757.2	47450.3	134.95	1.34767e+07	0.986757
Tube Investments Of India Ltd.	2021	0.00315462	14603.2	47450.3	134.95	1.34767e+07	0.986757
Tv18 Broadcast Ltd.	2021	0.00145237	848257	47450.3	134.95	1.34767e+07	0.986757
U P L Ltd.	2021	0.00184204	256458	47450.3	134.95	1.34767e+07	0.986757
Uco Bank	2021	-2.78194e-05	1.22335e+06	47450.3	134.95	1.34767e+07	0.986757
Uflex Ltd.	2021	0.00116106	35941.4	47450.3	134.95	1.34767e+07	0.986757
Ultratech Cement Ltd.	2021	0.00142878	22600.7	47450.3	134.95	1.34767e+07	0.986757
Union Bank Of India	2021	0.00117863	1.51364e+06	47450.3	134.95	1.34767e+07	0.986757
United Breweries Ltd.	2021	0.00117008	191346	47450.3	134.95	1.34767e+07	0.986757
V I P Industries Ltd.	2021	0.00148268	71606.7	47450.3	134.95	1.34767e+07	0.986757
V-Guard Industries Ltd.	2021	0.000546496	93173.1	47450.3	134.95	1.34767e+07	0.986757
V-Mart Retail Ltd.	2021	0.0016623	12506.7	47450.3	134.95	1.34767e+07	0.986757
Vaibhav Global Ltd.	2021	0.000485836	4295.94	47450.3	134.95	1.34767e+07	0.986757
Vakrangee Ltd.	2021	-0.00139962	4295.94	47450.3	134.95	1.34767e+07	0.986757
Vardhman Textiles Ltd.	2021	0.00309141	4295.94	47450.3	134.95	1.34767e+07	0.986757
Varun Beverages Ltd.	2021	0.00133908	4295.94	47450.3	134.95	1.34767e+07	0.986757
Vedanta Ltd.	2021	0.00280205	4295.94	47450.3	134.95	1.34767e+07	0.986757
Venky'S (India) Ltd.	2021	0.0017136	4295.94	47450.3	134.95	1.34767e+07	0.986757
Vinati Organics Ltd.	2021	0.00192112	12506.7	47450.3	134.95	1.34767e+07	0.986757
Vodafone Idea Ltd.	2021	0.001025	9.29155e+07	47450.3	134.95	1.34767e+07	0.986757
Voltas Ltd.	2021	0.00147448	81434	47450.3	134.95	1.34767e+07	0.986757
Wabco India Ltd.	2021	0.00168457	765.903	47450.3	134.95	1.34767e+07	0.986757
Welspun Corp Ltd.	2021	0.00112102	237832	47450.3	134.95	1.34767e+07	0.986757
Welspun India Ltd.	2021	0.00284656	311917	47450.3	134.95	1.34767e+07	0.986757
Whirlpool Of India Ltd.	2021	-0.00156033	12456.9	47450.3	134.95	1.34767e+07	0.986757
Wipro Ltd.	2021	0.00238061	591628	47450.3	134.95	1.34767e+07	0.986757
Wockhardt Ltd.	2021	-0.000944005	119106	47450.3	134.95	1.34767e+07	0.986757
Yes Bank Ltd.	2021	-0.00111484	2.14536e+07	47450.3	134.95	1.34767e+07	0.986757
Zee Entertainment Enterprises Ltd.	2021	0.00153964	1.05189e+06	47450.3	134.95	1.34767e+07	0.986757
Zensar Technologies Ltd.	2021	0.00313073	244474	47450.3	134.95	1.34767e+07	0.986757
Zydus Wellness Ltd.	2021	-0.000538513	3501.97	47450.3	134.95	1.34767e+07	0.986757

## Sheet: All NSE
Company_Name	YEAR	Adjusted_Return	Adjusted_Share Traded	Gold_Price	WPI_INDEX	GDP_YEAR
3M India Ltd.	2017	0.00226102	1685.06	28966.9	114.075	1.18195e+07
A B B India Ltd.	2017	0.00118625	94151.8	28966.9	114.075	1.18195e+07
A C C Ltd.	2017	0.00108504	396481	28966.9	114.075	1.18195e+07
A I A Engineering Ltd.	2017	0.000733789	51258.5	28966.9	114.075	1.18195e+07
A P L Apollo Tubes Ltd.	2017	0.00307564	19186.4	28966.9	114.075	1.18195e+07
A U Small Finance Bank Ltd.	2017	0.000167939	1.55798e+06	28966.9	114.075	1.18195e+07
Aarti Drugs Ltd.	2017	0.00192544	10362.6	28966.9	114.075	1.18195e+07
Aarti Industries Ltd.	2017	0.000688561	59508.4	28966.9	114.075	1.18195e+07
Aavas Financiers Ltd.	2017	0.00312964	0	28966.9	114.075	1.18195e+07
Abbott India Ltd.	2017	0.00158284	6469.29	28966.9	114.075	1.18195e+07
Adani Enterprises Ltd.	2017	0.00554606	7.06014e+06	28966.9	114.075	1.18195e+07
Adani Green Energy Ltd.	2017	0.000853546	0	28966.9	114.075	1.18195e+07
Adani Ports & Special Economic Zone Ltd.	2017	-0.00123321	3.7041e+06	28966.9	114.075	1.18195e+07
Adani Total Gas Ltd.	2017	0.00311829	0	28966.9	114.075	1.18195e+07
Adani Transmission Ltd.	2017	-0.000752276	1.25771e+06	28966.9	114.075	1.18195e+07
Aditya Birla Capital Ltd.	2017	-0.000509069	5.18029e+06	28966.9	114.075	1.18195e+07
Aditya Birla Fashion & Retail Ltd.	2017	0.00115092	548123	28966.9	114.075	1.18195e+07
Advanced Enzyme Technologies Ltd.	2017	0.00311835	216424	28966.9	114.075	1.18195e+07
Aegis Logistics Ltd.	2017	0.000508748	353698	28966.9	114.075	1.18195e+07
Ajanta Pharma Ltd.	2017	0.000379149	207058	28966.9	114.075	1.18195e+07
Alembic Pharmaceuticals Ltd.	2017	-0.000230824	62447.3	28966.9	114.075	1.18195e+07
Alkem Laboratories Ltd.	2017	0.000945234	37976.2	28966.9	114.075	1.18195e+07
Alkyl Amines Chemicals Ltd.	2017	-2.17485e-06	22700.4	28966.9	114.075	1.18195e+07
Allcargo Logistics Ltd.	2017	0.00144949	0	28966.9	114.075	1.18195e+07
Alok Industries Ltd.	2017	0.00286169	4.64797e+06	28966.9	114.075	1.18195e+07
Amara Raja Batteries Ltd.	2017	0.001552	498203	28966.9	114.075	1.18195e+07
Amber Enterprises India Ltd.	2017	0.00103335	0	28966.9	114.075	1.18195e+07
Ambuja Cements Ltd.	2017	0.00308616	2.24553e+06	28966.9	114.075	1.18195e+07
Apollo Hospitals Enterprise Ltd.	2017	0.000883697	450734	28966.9	114.075	1.18195e+07
Apollo Tyres Ltd.	2017	0.00115554	3.52784e+06	28966.9	114.075	1.18195e+07
Asahi India Glass Ltd.	2017	9.33881e-05	63924.9	28966.9	114.075	1.18195e+07
Ashok Leyland Ltd.	2017	0.00662125	1.06742e+07	28966.9	114.075	1.18195e+07
Asian Paints Ltd.	2017	0.000863383	840156	28966.9	114.075	1.18195e+07
Aster D M Healthcare Ltd.	2017	0.00248601	0	28966.9	114.075	1.18195e+07
Astral Ltd.	2017	0.00190358	83845.1	28966.9	114.075	1.18195e+07
Astrazeneca Pharma India Ltd.	2017	0.000972516	17231.4	28966.9	114.075	1.18195e+07
Atul Ltd.	2017	0.00317619	20920	28966.9	114.075	1.18195e+07
Aurobindo Pharma Ltd.	2017	0.00276909	2.61148e+06	28966.9	114.075	1.18195e+07
Avanti Feeds Ltd.	2017	0.00221912	96081.6	28966.9	114.075	1.18195e+07
Avenue Supermarts Ltd.	2017	0.00178716	1.80416e+06	28966.9	114.075	1.18195e+07
Axis Bank Ltd.	2017	0.0025107	8.05119e+06	28966.9	114.075	1.18195e+07
B A S F India Ltd.	2017	0.00313696	29947	28966.9	114.075	1.18195e+07
B E M L Ltd.	2017	4.44035e-05	692949	28966.9	114.075	1.18195e+07
B S E Ltd.	2017	0.000314395	249254	28966.9	114.075	1.18195e+07
Bajaj Auto Ltd.	2017	0.00181032	266226	28966.9	114.075	1.18195e+07
Bajaj Electricals Ltd.	2017	-0.00098187	334836	28966.9	114.075	1.18195e+07
Bajaj Finance Ltd.	2017	0.0019291	1.04004e+06	28966.9	114.075	1.18195e+07
Bajaj Finserv Ltd.	2017	0.000210016	139425	28966.9	114.075	1.18195e+07
Bajaj Holdings & Invst. Ltd.	2017	0.00100328	23901.2	28966.9	114.075	1.18195e+07
Balaji Amines Ltd.	2017	0.00137934	66520.1	28966.9	114.075	1.18195e+07
Balkrishna Industries Ltd.	2017	0.00186125	192690	28966.9	114.075	1.18195e+07
Balrampur Chini Mills Ltd.	2017	0.000427263	1.59077e+06	28966.9	114.075	1.18195e+07
Bandhan Bank Ltd.	2017	0.000713883	0	28966.9	114.075	1.18195e+07
Bank Of Baroda	2017	0.00223266	1.09302e+07	28966.9	114.075	1.18195e+07
Bank Of India	2017	0.00215188	4.70859e+06	28966.9	114.075	1.18195e+07
Bank Of Maharashtra	2017	0.00220295	416464	28966.9	114.075	1.18195e+07
Bata India Ltd.	2017	0.00116038	669302	28966.9	114.075	1.18195e+07
Bayer Cropscience Ltd.	2017	6.55819e-05	16117.9	28966.9	114.075	1.18195e+07
Berger Paints India Ltd.	2017	0.00206669	618512	28966.9	114.075	1.18195e+07
Bharat Dynamics Ltd.	2017	0.00473698	0	28966.9	114.075	1.18195e+07
Bharat Electronics Ltd.	2017	-0.000124637	3.14056e+06	28966.9	114.075	1.18195e+07
Bharat Forge Ltd.	2017	0.00289663	873419	28966.9	114.075	1.18195e+07
Bharat Heavy Electricals Ltd.	2017	-0.00152942	6.82294e+06	28966.9	114.075	1.18195e+07
Bharat Petroleum Corpn. Ltd.	2017	0.00199368	3.00826e+06	28966.9	114.075	1.18195e+07
Bharti Airtel Ltd.	2017	0.000455624	5.34751e+06	28966.9	114.075	1.18195e+07
Biocon Ltd.	2017	0.00196347	2.0974e+06	28966.9	114.075	1.18195e+07
Birla Corporation Ltd.	2017	0.00170839	78223.8	28966.9	114.075	1.18195e+07
Birlasoft Ltd.	2017	0.000807813	1.31455e+06	28966.9	114.075	1.18195e+07
Blue Dart Express Ltd.	2017	0.00143121	10141.9	28966.9	114.075	1.18195e+07
Blue Star Ltd.	2017	0.00135468	82682.2	28966.9	114.075	1.18195e+07
Bombay Burmah Trdg. Corpn. Ltd.	2017	0.00247261	252312	28966.9	114.075	1.18195e+07
Borosil Renewables Ltd.	2017	0.00158646	0	28966.9	114.075	1.18195e+07
Bosch Ltd.	2017	7.31144e-06	15825.5	28966.9	114.075	1.18195e+07
Brigade Enterprises Ltd.	2017	0.00198135	142508	28966.9	114.075	1.18195e+07
Brightcom Group Ltd.	2017	-0.000613184	0	28966.9	114.075	1.18195e+07
Britannia Industries Ltd.	2017	0.00268532	158232	28966.9	114.075	1.18195e+07
C C L Products (India) Ltd.	2017	0.00216849	79876.3	28966.9	114.075	1.18195e+07
C E S C Ltd.	2017	0.00242121	649041	28966.9	114.075	1.18195e+07
C G Power & Indl. Solutions Ltd.	2017	0.00309265	2.75656e+06	28966.9	114.075	1.18195e+07
Cadila Healthcare Ltd.	2017	0.00122512	1.20106e+06	28966.9	114.075	1.18195e+07
Can Fin Homes Ltd.	2017	0.000237812	259161	28966.9	114.075	1.18195e+07
Canara Bank	2017	0.00161967	2.89867e+06	28966.9	114.075	1.18195e+07
Caplin Point Laboratories Ltd.	2017	-0.000602141	100536	28966.9	114.075	1.18195e+07
Carborundum Universal Ltd.	2017	0.00162682	140812	28966.9	114.075	1.18195e+07
Castrol India Ltd.	2017	0.00081678	934499	28966.9	114.075	1.18195e+07
Ceat Ltd.	2017	0.00154011	767843	28966.9	114.075	1.18195e+07
Central Bank Of India	2017	0.002649	1.31645e+06	28966.9	114.075	1.18195e+07
Central Depository Services (India) Ltd.	2017	-0.000779805	3.50572e+06	28966.9	114.075	1.18195e+07
Century Plyboards (India) Ltd.	2017	0.00229586	313564	28966.9	114.075	1.18195e+07
Century Textiles & Inds. Ltd.	2017	0.000272804	760063	28966.9	114.075	1.18195e+07
Cera Sanitaryware Ltd.	2017	0.000686447	7139.8	28966.9	114.075	1.18195e+07
Chambal Fertilisers & Chemicals Ltd.	2017	0.00370051	1.08235e+06	28966.9	114.075	1.18195e+07
Cholamandalam Financial Holdings Ltd.	2017	0.00313966	95106.5	28966.9	114.075	1.18195e+07
Cholamandalam Investment & Finance Co. Ltd.	2017	0.000961645	261338	28966.9	114.075	1.18195e+07
Cipla Ltd.	2017	0.00347648	1.27316e+06	28966.9	114.075	1.18195e+07
City Union Bank Ltd.	2017	0.00387294	579403	28966.9	114.075	1.18195e+07
Coal India Ltd.	2017	0.0101062	4.15327e+06	28966.9	114.075	1.18195e+07
Cochin Shipyard Ltd.	2017	0.0059041	1.08601e+06	28966.9	114.075	1.18195e+07
Coforge Ltd.	2017	0.00139125	389364	28966.9	114.075	1.18195e+07
Colgate-Palmolive (India) Ltd.	2017	-0.000790604	352463	28966.9	114.075	1.18195e+07
Container Corpn. Of India Ltd.	2017	-0.000972141	356005	28966.9	114.075	1.18195e+07
Coromandel International Ltd.	2017	0.0013162	250719	28966.9	114.075	1.18195e+07
Creditaccess Grameen Ltd.	2017	0.00162603	0	28966.9	114.075	1.18195e+07
Crisil Ltd.	2017	0.000727976	30829.5	28966.9	114.075	1.18195e+07
Crompton Greaves Consumer Electricals Ltd.	2017	0.00047328	950343	28966.9	114.075	1.18195e+07
Cummins India Ltd.	2017	0.00439542	309142	28966.9	114.075	1.18195e+07
Cyient Ltd.	2017	0.00120544	258985	28966.9	114.075	1.18195e+07
D C M Shriram Ltd.	2017	0.00206979	150317	28966.9	114.075	1.18195e+07
D L F Ltd.	2017	0.00102898	1.02111e+07	28966.9	114.075	1.18195e+07
Dabur India Ltd.	2017	0.00349683	1.37404e+06	28966.9	114.075	1.18195e+07
Dalmia Bharat Ltd.	2017	0.00102147	0	28966.9	114.075	1.18195e+07
Deepak Nitrite Ltd.	2017	-3.5252e-05	250550	28966.9	114.075	1.18195e+07
Delta Corp Ltd.	2017	0.00354803	3.84175e+06	28966.9	114.075	1.18195e+07
Dhani Services Ltd.	2017	0.000803443	2.97527e+06	28966.9	114.075	1.18195e+07
Dilip Buildcon Ltd.	2017	0.000508205	336637	28966.9	114.075	1.18195e+07
Divi'S Laboratories Ltd.	2017	0.00199526	1.95938e+06	28966.9	114.075	1.18195e+07
Dixon Technologies (India) Ltd.	2017	0.0031177	190927	28966.9	114.075	1.18195e+07
Dr. Lal Pathlabs Ltd.	2017	0.00218324	111680	28966.9	114.075	1.18195e+07
Dr. Reddy'S Laboratories Ltd.	2017	0.00158754	551187	28966.9	114.075	1.18195e+07
E I D-Parry (India) Ltd.	2017	0.00027573	255522	28966.9	114.075	1.18195e+07
E I H Ltd.	2017	-0.000628212	154915	28966.9	114.075	1.18195e+07
E P L Ltd.	2017	0.00165933	90045.4	28966.9	114.075	1.18195e+07
Eclerx Services Ltd.	2017	0.00176123	34620.1	28966.9	114.075	1.18195e+07
Edelweiss Financial Services Ltd.	2017	-0.000395095	2.67122e+06	28966.9	114.075	1.18195e+07
Eicher Motors Ltd.	2017	0	39737.3	28966.9	114.075	1.18195e+07
Elgi Equipments Ltd.	2017	-0.00163957	50184.5	28966.9	114.075	1.18195e+07
Emami Ltd.	2017	0	158713	28966.9	114.075	1.18195e+07
Endurance Technologies Ltd.	2017	-0.000163134	75355.5	28966.9	114.075	1.18195e+07
Engineers India Ltd.	2017	0	2.79992e+06	28966.9	114.075	1.18195e+07
Equitas Holdings Ltd.	2017	0.00106949	1.64373e+06	28966.9	114.075	1.18195e+07
Eris Lifesciences Ltd.	2017	0.00134864	290750	28966.9	114.075	1.18195e+07
Escorts Ltd.	2017	0.00309805	1.37842e+06	28966.9	114.075	1.18195e+07
Exide Industries Ltd.	2017	0.000838271	1.93375e+06	28966.9	114.075	1.18195e+07
F D C Ltd.	2017	0.0091572	83783.2	28966.9	114.075	1.18195e+07
Federal Bank Ltd.	2017	0.00118412	9.7123e+06	28966.9	114.075	1.18195e+07
Fertilisers & Chemicals, Travancore Ltd.	2017	0.000291489	406842	28966.9	114.075	1.18195e+07
Fine Organic Inds. Ltd.	2017	0.00206027	0	28966.9	114.075	1.18195e+07
Finolex Cables Ltd.	2017	0.00313296	83202.7	28966.9	114.075	1.18195e+07
Finolex Industries Ltd.	2017	0.00301434	60007.2	28966.9	114.075	1.18195e+07
Firstsource Solutions Ltd.	2017	0.00182437	3.1129e+06	28966.9	114.075	1.18195e+07
Fortis Healthcare Ltd.	2017	0.00315769	5.25953e+06	28966.9	114.075	1.18195e+07
G A I L (India) Ltd.	2017	9.2631e-05	3.63105e+06	28966.9	114.075	1.18195e+07
G M M Pfaudler Ltd.	2017	0.00178704	0	28966.9	114.075	1.18195e+07
Galaxy Surfactants Ltd.	2017	0.00195481	0	28966.9	114.075	1.18195e+07
Garware Technical Fibres Ltd.	2017	0.000258805	18544.5	28966.9	114.075	1.18195e+07
General Insurance Corpn. Of India	2017	0.00182803	831405	28966.9	114.075	1.18195e+07
Glaxosmithkline Pharmaceuticals Ltd.	2017	0.0109249	9463.51	28966.9	114.075	1.18195e+07
Glenmark Pharmaceuticals Ltd.	2017	0.00321744	978258	28966.9	114.075	1.18195e+07
Godfrey Phillips India Ltd.	2017	0.000348097	150136	28966.9	114.075	1.18195e+07
Godrej Agrovet Ltd.	2017	0.0033009	773733	28966.9	114.075	1.18195e+07
Godrej Consumer Products Ltd.	2017	0.001996	455956	28966.9	114.075	1.18195e+07
Godrej Industries Ltd.	2017	0.000955511	478957	28966.9	114.075	1.18195e+07
Godrej Properties Ltd.	2017	0.000369473	300603	28966.9	114.075	1.18195e+07
Granules India Ltd.	2017	0.00219163	1.94912e+06	28966.9	114.075	1.18195e+07
Graphite India Ltd.	2017	0.00214376	1.57137e+06	28966.9	114.075	1.18195e+07
Grasim Industries Ltd.	2017	0.00194499	1.32121e+06	28966.9	114.075	1.18195e+07
Great Eastern Shipping Co. Ltd.	2017	0.00121718	119103	28966.9	114.075	1.18195e+07
Grindwell Norton Ltd.	2017	0.00201512	26641.5	28966.9	114.075	1.18195e+07
Gujarat Alkalies & Chemicals Ltd.	2017	0.000703566	163369	28966.9	114.075	1.18195e+07
Gujarat Ambuja Exports Ltd.	2017	0.00305229	145009	28966.9	114.075	1.18195e+07
Gujarat Gas Ltd.	2017	0.00138228	82195.7	28966.9	114.075	1.18195e+07
Gujarat Narmada Valley Fertilizers & Chemicals Ltd.	2017	0.00123309	1.08997e+06	28966.9	114.075	1.18195e+07
Gujarat Pipavav Port Ltd.	2017	0.000819506	546105	28966.9	114.075	1.18195e+07
Gujarat State Fertilizers & Chemicals Ltd.	2017	-0.000623019	2.19191e+06	28966.9	114.075	1.18195e+07
Gujarat State Petronet Ltd.	2017	-0.000456307	800023	28966.9	114.075	1.18195e+07
H C L Technologies Ltd.	2017	0.000578006	1.47314e+06	28966.9	114.075	1.18195e+07
H D F C Asset Mgmt. Co. Ltd.	2017	0.00443359	0	28966.9	114.075	1.18195e+07
H D F C Bank Ltd.	2017	0.00376587	1.88658e+06	28966.9	114.075	1.18195e+07
H D F C Life Insurance Co. Ltd.	2017	0.000582236	1.02483e+07	28966.9	114.075	1.18195e+07
H E G Ltd.	2017	0.000316949	380019	28966.9	114.075	1.18195e+07
H F C L Ltd.	2017	0.00415639	7.07613e+06	28966.9	114.075	1.18195e+07
Hathway Cable & Datacom Ltd.	2017	0.00162506	467489	28966.9	114.075	1.18195e+07
Hatsun Agro Products Ltd.	2017	0.00238547	46178.9	28966.9	114.075	1.18195e+07
Havells India Ltd.	2017	0.00434325	1.3646e+06	28966.9	114.075	1.18195e+07
Hero Motocorp Ltd.	2017	0.00209598	354106	28966.9	114.075	1.18195e+07
Hikal Ltd.	2017	0.0010446	106312	28966.9	114.075	1.18195e+07
Hindalco Industries Ltd.	2017	0.000476411	1.07168e+07	28966.9	114.075	1.18195e+07
Hinduja Global Solutions Ltd.	2017	-0.000399216	37942.7	28966.9	114.075	1.18195e+07
Hindustan Aeronautics Ltd.	2017	0	0	28966.9	114.075	1.18195e+07
Hindustan Copper Ltd.	2017	-0.00132572	2.69964e+06	28966.9	114.075	1.18195e+07
Hindustan Petroleum Corpn. Ltd.	2017	0.000243735	3.69777e+06	28966.9	114.075	1.18195e+07
Hindustan Unilever Ltd.	2017	0.00231165	1.19128e+06	28966.9	114.075	1.18195e+07
Hindustan Zinc Ltd.	2017	0.000417454	2.16261e+06	28966.9	114.075	1.18195e+07
Honeywell Automation India Ltd.	2017	0.00163005	1117.4	28966.9	114.075	1.18195e+07
Housing & Urban Devp. Corpn. Ltd.	2017	0.000767979	8.86015e+06	28966.9	114.075	1.18195e+07
Housing Development Finance Corpn. Ltd.	2017	0.00182515	2.63112e+06	28966.9	114.075	1.18195e+07
I C I C I Bank Ltd.	2017	0.000190884	1.6334e+07	28966.9	114.075	1.18195e+07
I C I C I Lombard General Insurance Co. Ltd.	2017	0.000915271	950824	28966.9	114.075	1.18195e+07
I C I C I Prudential Life Insurance Co. Ltd.	2017	0.000820403	1.1057e+06	28966.9	114.075	1.18195e+07
I C I C I Securities Ltd.	2017	0.00155455	0	28966.9	114.075	1.18195e+07
I D B I Bank Ltd.	2017	0.000486794	3.99997e+06	28966.9	114.075	1.18195e+07
I D F C First Bank Ltd.	2017	0	8.6833e+06	28966.9	114.075	1.18195e+07
I D F C Ltd.	2017	-0.00020164	8.49664e+06	28966.9	114.075	1.18195e+07
I F B Industries Ltd.	2017	0.00168462	42555.7	28966.9	114.075	1.18195e+07
I I F L Finance Ltd.	2017	0.000764238	247987	28966.9	114.075	1.18195e+07
I R B Infrastructure Developers Ltd.	2017	0.00167043	2.27405e+06	28966.9	114.075	1.18195e+07
I T C Ltd.	2017	0.00335248	1.1745e+07	28966.9	114.075	1.18195e+07
I T I Ltd.	2017	0.00170094	1.73769e+06	28966.9	114.075	1.18195e+07
India Cements Ltd.	2017	0.00199602	4.47355e+06	28966.9	114.075	1.18195e+07
Indiabulls Housing Finance Ltd.	2017	0.00328471	1.69529e+06	28966.9	114.075	1.18195e+07
Indiabulls Real Estate Ltd.	2017	0.00349952	1.49471e+07	28966.9	114.075	1.18195e+07
Indian Bank	2017	0.00399771	1.20696e+06	28966.9	114.075	1.18195e+07
Indian Energy Exchange Ltd.	2017	0.00431073	112042	28966.9	114.075	1.18195e+07
Indian Hotels Co. Ltd.	2017	0.0028545	676028	28966.9	114.075	1.18195e+07
Indian Oil Corpn. Ltd.	2017	0	4.77912e+06	28966.9	114.075	1.18195e+07
Indian Overseas Bank	2017	0.000852986	1.56518e+06	28966.9	114.075	1.18195e+07
Indo Count Inds. Ltd.	2017	0.00162318	1.51791e+06	28966.9	114.075	1.18195e+07
Indoco Remedies Ltd.	2017	0.000517808	97107.5	28966.9	114.075	1.18195e+07
Indraprastha Gas Ltd.	2017	0.00398098	740825	28966.9	114.075	1.18195e+07
Indus Towers Ltd.	2017	0.00260744	3.66247e+06	28966.9	114.075	1.18195e+07
Indusind Bank Ltd.	2017	0	1.15322e+06	28966.9	114.075	1.18195e+07
Infibeam Avenues Ltd.	2017	0.00139142	3.27791e+06	28966.9	114.075	1.18195e+07
Info Edge (India) Ltd.	2017	0.00265078	82639.5	28966.9	114.075	1.18195e+07
Infosys Ltd.	2017	0.00159985	4.90182e+06	28966.9	114.075	1.18195e+07
Inox Leisure Ltd.	2017	0.00232633	164983	28966.9	114.075	1.18195e+07
Intellect Design Arena Ltd.	2017	0	601439	28966.9	114.075	1.18195e+07
Interglobe Aviation Ltd.	2017	0.00223004	543483	28966.9	114.075	1.18195e+07
Ipca Laboratories Ltd.	2017	0.00200186	250883	28966.9	114.075	1.18195e+07
Ircon International Ltd.	2017	0.0044208	0	28966.9	114.075	1.18195e+07
J B Chemicals & Pharmaceuticals Ltd.	2017	0.001412	100488	28966.9	114.075	1.18195e+07
J K Cement Ltd.	2017	0	39509.9	28966.9	114.075	1.18195e+07
J K Lakshmi Cement Ltd.	2017	0.00270331	120750	28966.9	114.075	1.18195e+07
J K Paper Ltd.	2017	0.000961267	844778	28966.9	114.075	1.18195e+07
J M Financial Ltd.	2017	0.00023726	1.39904e+06	28966.9	114.075	1.18195e+07
J S W Energy Ltd.	2017	0.00149897	9.17324e+06	28966.9	114.075	1.18195e+07
J S W Steel Ltd.	2017	0.00200733	4.58259e+06	28966.9	114.075	1.18195e+07
Jamna Auto Inds. Ltd.	2017	0.00130007	949064	28966.9	114.075	1.18195e+07
Jindal Stainless (Hisar) Ltd.	2017	0	403896	28966.9	114.075	1.18195e+07
Jindal Stainless Ltd.	2017	0.000527308	675023	28966.9	114.075	1.18195e+07
Jindal Steel & Power Ltd.	2017	0	1.10616e+07	28966.9	114.075	1.18195e+07
Jubilant Foodworks Ltd.	2017	0.00169499	797527	28966.9	114.075	1.18195e+07
Jubilant Pharmova Ltd.	2017	-0.00214185	541360	28966.9	114.075	1.18195e+07
Just Dial Ltd.	2017	0.00283934	2.57197e+06	28966.9	114.075	1.18195e+07
Jyothy Labs Ltd.	2017	0.000691346	139707	28966.9	114.075	1.18195e+07
K E C International Ltd.	2017	0.00112348	663354	28966.9	114.075	1.18195e+07
K N R Constructions Ltd.	2017	0.00145884	140593	28966.9	114.075	1.18195e+07
K P R Mill Ltd.	2017	0	35757.5	28966.9	114.075	1.18195e+07
K R B L Ltd.	2017	0.00115105	144729	28966.9	114.075	1.18195e+07
Kajaria Ceramics Ltd.	2017	0.00224671	316393	28966.9	114.075	1.18195e+07
Kalpataru Power Transmission Ltd.	2017	0.000830645	132803	28966.9	114.075	1.18195e+07
Kansai Nerolac Paints Ltd.	2017	0.00139614	180073	28966.9	114.075	1.18195e+07
Karur Vysya Bank Ltd.	2017	0.000915688	1.4551e+06	28966.9	114.075	1.18195e+07
Kei Industries Ltd.	2017	0	437056	28966.9	114.075	1.18195e+07
Kotak Mahindra Bank Ltd.	2017	0.00213343	1.98624e+06	28966.9	114.075	1.18195e+07
L & T Finance Holdings Ltd.	2017	0.0009304	5.41348e+06	28966.9	114.075	1.18195e+07
L & T Technology Services Ltd.	2017	0.000903682	30796	28966.9	114.075	1.18195e+07
L I C Housing Finance Ltd.	2017	0.00229393	1.83923e+06	28966.9	114.075	1.18195e+07
Lakshmi Machine Works Ltd.	2017	0.00308675	6711.14	28966.9	114.075	1.18195e+07
Larsen & Toubro Infotech Ltd.	2017	0.00026364	63295.2	28966.9	114.075	1.18195e+07
Larsen & Toubro Ltd.	2017	0	1.73688e+06	28966.9	114.075	1.18195e+07
Laurus Labs Ltd.	2017	0	152837	28966.9	114.075	1.18195e+07
Linde India Ltd.	2017	0	45912.9	28966.9	114.075	1.18195e+07
Lupin Ltd.	2017	0	1.64705e+06	28966.9	114.075	1.18195e+07
Lux Industries Ltd.	2017	0	39825.8	28966.9	114.075	1.18195e+07
M M T C Ltd.	2017	0.00564787	2.20762e+06	28966.9	114.075	1.18195e+07
M O I L Ltd.	2017	0.00075444	545790	28966.9	114.075	1.18195e+07
M R F Ltd.	2017	0.00426355	13537.3	28966.9	114.075	1.18195e+07
Mahanagar Gas Ltd.	2017	0.00121061	193107	28966.9	114.075	1.18195e+07
Mahindra & Mahindra Financial Services Ltd.	2017	-0.00127594	2.20714e+06	28966.9	114.075	1.18195e+07
Mahindra & Mahindra Ltd.	2017	0.00203494	1.22555e+06	28966.9	114.075	1.18195e+07
Mahindra C I E Automotive Ltd.	2017	0.00151333	197188	28966.9	114.075	1.18195e+07
Mahindra Holidays & Resorts India Ltd.	2017	0.00187563	73330.5	28966.9	114.075	1.18195e+07
Mahindra Logistics Ltd.	2017	0.000721605	518425	28966.9	114.075	1.18195e+07
Manappuram Finance Ltd.	2017	0.00134315	5.97785e+06	28966.9	114.075	1.18195e+07
Mangalore Refinery & Petrochemicals Ltd.	2017	0.000227208	1.94177e+06	28966.9	114.075	1.18195e+07
Marico Ltd.	2017	0.000272246	1.10691e+06	28966.9	114.075	1.18195e+07
Maruti Suzuki India Ltd.	2017	-0.000521752	463410	28966.9	114.075	1.18195e+07
Mastek Ltd.	2017	0.00201613	473524	28966.9	114.075	1.18195e+07
Max Financial Services Ltd.	2017	0.00102175	848673	28966.9	114.075	1.18195e+07
Minda Industries Ltd.	2017	0.00197633	115227	28966.9	114.075	1.18195e+07
Mindtree Ltd.	2017	0	556014	28966.9	114.075	1.18195e+07
Motilal Oswal Financial Services Ltd.	2017	0.00108374	145500	28966.9	114.075	1.18195e+07
Mphasis Ltd.	2017	0.00107603	118976	28966.9	114.075	1.18195e+07
Multi Commodity Exchange Of India Ltd.	2017	0.0022889	324988	28966.9	114.075	1.18195e+07
Muthoot Finance Ltd.	2017	0	680054	28966.9	114.075	1.18195e+07
N B C C (India) Ltd.	2017	0	1.62978e+06	28966.9	114.075	1.18195e+07
N C C Ltd.	2017	0.00384733	4.8346e+06	28966.9	114.075	1.18195e+07
N H P C Ltd.	2017	0	6.8562e+06	28966.9	114.075	1.18195e+07
N L C India Ltd.	2017	0.00177043	496276	28966.9	114.075	1.18195e+07
N M D C Ltd.	2017	5.61634e-05	3.09655e+06	28966.9	114.075	1.18195e+07
N T P C Ltd.	2017	0.000312157	5.90038e+06	28966.9	114.075	1.18195e+07
Narayana Hrudayalaya Ltd.	2017	0	95045.7	28966.9	114.075	1.18195e+07
Natco Pharma Ltd.	2017	0.00104011	370661	28966.9	114.075	1.18195e+07
National Aluminium Co. Ltd.	2017	0	4.21712e+06	28966.9	114.075	1.18195e+07
Navin Fluorine Intl. Ltd.	2017	0	34727.5	28966.9	114.075	1.18195e+07
Nesco Ltd.	2017	0.00588799	18500.8	28966.9	114.075	1.18195e+07
Nestle India Ltd.	2017	0.000610106	41552.1	28966.9	114.075	1.18195e+07
Network18 Media & Invst. Ltd.	2017	0.00193032	1.17899e+06	28966.9	114.075	1.18195e+07
New India Assurance Co. Ltd.	2017	0.00268554	196220	28966.9	114.075	1.18195e+07
Nippon Life India Asset Mgmt. Ltd.	2017	0.000754503	2.20126e+06	28966.9	114.075	1.18195e+07
Nocil Ltd.	2017	0.00248511	1.2807e+06	28966.9	114.075	1.18195e+07
Oberoi Realty Ltd.	2017	0.000541322	285063	28966.9	114.075	1.18195e+07
Oil & Natural Gas Corpn. Ltd.	2017	0.00117444	7.29577e+06	28966.9	114.075	1.18195e+07
Oil India Ltd.	2017	0.000509567	593040	28966.9	114.075	1.18195e+07
Oracle Financial Services Software Ltd.	2017	0.00204021	30578.1	28966.9	114.075	1.18195e+07
Orient Electric Ltd.	2017	0.001602	0	28966.9	114.075	1.18195e+07
P C B L Ltd.	2017	0.00240804	414466	28966.9	114.075	1.18195e+07
P I Industries Ltd.	2017	0.00156764	207208	28966.9	114.075	1.18195e+07
P N B Housing Finance Ltd.	2017	0	237856	28966.9	114.075	1.18195e+07
P N C Infratech Ltd.	2017	0.00165178	411511	28966.9	114.075	1.18195e+07
P V R Ltd.	2017	0.00174893	209667	28966.9	114.075	1.18195e+07
Page Industries Ltd.	2017	-0.000112672	14256.1	28966.9	114.075	1.18195e+07
Persistent Systems Ltd.	2017	0.000255337	121713	28966.9	114.075	1.18195e+07
Petronet L N G Ltd.	2017	0.0011546	3.39666e+06	28966.9	114.075	1.18195e+07
Pfizer Ltd.	2017	0.00253543	17000.1	28966.9	114.075	1.18195e+07
Phoenix Mills Ltd.	2017	0	106150	28966.9	114.075	1.18195e+07
Pidilite Industries Ltd.	2017	0.00122539	454150	28966.9	114.075	1.18195e+07
Piramal Enterprises Ltd.	2017	-8.93315e-05	178094	28966.9	114.075	1.18195e+07
Poly Medicure Ltd.	2017	0.0010369	48821.4	28966.9	114.075	1.18195e+07
Polyplex Corporation Ltd.	2017	0.00122412	36237.2	28966.9	114.075	1.18195e+07
Poonawalla Fincorp Ltd.	2017	0.0015036	282646	28966.9	114.075	1.18195e+07
Power Finance Corpn. Ltd.	2017	0.00222888	6.55831e+06	28966.9	114.075	1.18195e+07
Power Grid Corpn. Of India Ltd.	2017	0.00162034	5.37582e+06	28966.9	114.075	1.18195e+07
Praj Industries Ltd.	2017	0.000841938	1.01387e+06	28966.9	114.075	1.18195e+07
Prestige Estates Projects Ltd.	2017	0.00146477	385748	28966.9	114.075	1.18195e+07
Prism Johnson Ltd.	2017	0.00392806	286919	28966.9	114.075	1.18195e+07
Privi Speciality Chemicals Ltd.	2017	0	0	28966.9	114.075	1.18195e+07
Procter & Gamble Health Ltd.	2017	0	22308	28966.9	114.075	1.18195e+07
Procter & Gamble Hygiene & Health Care Ltd.	2017	0.00770099	5163.72	28966.9	114.075	1.18195e+07
Punjab National Bank	2017	0.0021094	1.25935e+07	28966.9	114.075	1.18195e+07
Quess Corp Ltd.	2017	0.00103789	124456	28966.9	114.075	1.18195e+07
R B L Bank Ltd.	2017	0.00129926	1.52957e+06	28966.9	114.075	1.18195e+07
R E C Ltd.	2017	0.00283277	7.23707e+06	28966.9	114.075	1.18195e+07
R H I Magnesita India Ltd.	2017	0.0017868	79580.6	28966.9	114.075	1.18195e+07
Radico Khaitan Ltd.	2017	0.00377457	1.14587e+06	28966.9	114.075	1.18195e+07
Rain Industries Ltd.	2017	0.00244564	2.79156e+06	28966.9	114.075	1.18195e+07
Rajesh Exports Ltd.	2017	0.00213302	493430	28966.9	114.075	1.18195e+07
Rallis India Ltd.	2017	0.00211802	381327	28966.9	114.075	1.18195e+07
Ramco Cements Ltd.	2017	0	253414	28966.9	114.075	1.18195e+07
Rashtriya Chemicals & Fertilizers Ltd.	2017	0	3.91099e+06	28966.9	114.075	1.18195e+07
Ratnamani Metals & Tubes Ltd.	2017	0	17102.3	28966.9	114.075	1.18195e+07
Rattanindia Enterprises Ltd.	2017	0	0	28966.9	114.075	1.18195e+07
Redington (India) Ltd.	2017	0	429096	28966.9	114.075	1.18195e+07
Relaxo Footwears Ltd.	2017	0	35886.1	28966.9	114.075	1.18195e+07
Reliance Industries Ltd.	2017	0	5.29982e+06	28966.9	114.075	1.18195e+07
Rites Ltd.	2017	0.000492813	0	28966.9	114.075	1.18195e+07
S B I Life Insurance Co. Ltd.	2017	0.00162196	1.21627e+06	28966.9	114.075	1.18195e+07
S I S Ltd.	2017	0.000989189	152349	28966.9	114.075	1.18195e+07
S J V N Ltd.	2017	0.000426108	878653	28966.9	114.075	1.18195e+07
S K F India Ltd.	2017	0	20668.7	28966.9	114.075	1.18195e+07
S R F Ltd.	2017	0.00526578	206829	28966.9	114.075	1.18195e+07
Sanofi India Ltd.	2017	0.00162246	8329.58	28966.9	114.075	1.18195e+07
Saregama India Ltd.	2017	-0.000650978	0	28966.9	114.075	1.18195e+07
Schaeffler India Ltd.	2017	0.00247129	5103.85	28966.9	114.075	1.18195e+07
Sequent Scientific Ltd.	2017	-0.000529345	110558	28966.9	114.075	1.18195e+07
Sheela Foam Ltd.	2017	0.0017726	15821.6	28966.9	114.075	1.18195e+07
Shilpa Medicare Ltd.	2017	0.000993163	40682.2	28966.9	114.075	1.18195e+07
Shipping Corpn. Of India Ltd.	2017	0.000415261	1.43836e+06	28966.9	114.075	1.18195e+07
Shree Cement Ltd.	2017	0.000521817	18778.4	28966.9	114.075	1.18195e+07
Shree Renuka Sugars Ltd.	2017	0.00204118	0	28966.9	114.075	1.18195e+07
Shriram City Union Finance Ltd.	2017	0	32713.2	28966.9	114.075	1.18195e+07
Shriram Transport Finance Co. Ltd.	2017	0.000445685	792305	28966.9	114.075	1.18195e+07
Siemens Ltd.	2017	0.00354918	198557	28966.9	114.075	1.18195e+07
Sobha Ltd.	2017	0.00202768	380532	28966.9	114.075	1.18195e+07
Solar Industries India Ltd.	2017	0	26411.1	28966.9	114.075	1.18195e+07
Solara Active Pharma Sciences Ltd.	2017	0	0	28966.9	114.075	1.18195e+07
Sonata Software Ltd.	2017	0.00130623	270882	28966.9	114.075	1.18195e+07
State Bank Of India	2017	0	1.66532e+07	28966.9	114.075	1.18195e+07
Steel Authority Of India Ltd.	2017	0	8.13591e+06	28966.9	114.075	1.18195e+07
Sterlite Technologies Ltd.	2017	0.000949192	1.43436e+06	28966.9	114.075	1.18195e+07
Strides Pharma Science Ltd.	2017	0.00233439	385255	28966.9	114.075	1.18195e+07
Sudarshan Chemical Inds. Ltd.	2017	0	121138	28966.9	114.075	1.18195e+07
Sun Pharma Advanced Research Co. Ltd.	2017	0.0044079	414641	28966.9	114.075	1.18195e+07
Sun Pharmaceutical Inds. Ltd.	2017	-0.000976695	4.44879e+06	28966.9	114.075	1.18195e+07
Sun T V Network Ltd.	2017	0.000490314	1.60471e+06	28966.9	114.075	1.18195e+07
Sundaram Finance Ltd.	2017	0	36714.7	28966.9	114.075	1.18195e+07
Sundram Fasteners Ltd.	2017	0.00199961	189728	28966.9	114.075	1.18195e+07
Sunteck Realty Ltd.	2017	-0.00043429	243074	28966.9	114.075	1.18195e+07
Suprajit Engineering Ltd.	2017	0.00256945	93815.2	28966.9	114.075	1.18195e+07
Supreme Industries Ltd.	2017	0.0019178	58838.6	28966.9	114.075	1.18195e+07
Supreme Petrochem Ltd.	2017	0.00278428	63562.9	28966.9	114.075	1.18195e+07
Suzlon Energy Ltd.	2017	0.00511485	4.34226e+07	28966.9	114.075	1.18195e+07
Symphony Ltd.	2017	0.00194209	35789.6	28966.9	114.075	1.18195e+07
Syngene International Ltd.	2017	0.00152161	133263	28966.9	114.075	1.18195e+07
T C I Express Ltd.	2017	0.00254138	37239.7	28966.9	114.075	1.18195e+07
T C N S Clothing Co. Ltd.	2017	0.000352031	0	28966.9	114.075	1.18195e+07
T T K Prestige Ltd.	2017	0.00162785	7229.4	28966.9	114.075	1.18195e+07
T V S Motor Co. Ltd.	2017	-0.000260301	1.14358e+06	28966.9	114.075	1.18195e+07
Tanla Platforms Ltd.	2017	0.00261424	667911	28966.9	114.075	1.18195e+07
Tata Chemicals Ltd.	2017	0.00120277	698832	28966.9	114.075	1.18195e+07
Tata Coffee Ltd.	2017	0.00287901	755448	28966.9	114.075	1.18195e+07
Tata Communications Ltd.	2017	-0.00148545	721123	28966.9	114.075	1.18195e+07
Tata Consultancy Services Ltd.	2017	0.00145663	1.10515e+06	28966.9	114.075	1.18195e+07
Tata Consumer Products Ltd.	2017	0.001437	3.69694e+06	28966.9	114.075	1.18195e+07
Tata Elxsi Ltd.	2017	0.000345075	454215	28966.9	114.075	1.18195e+07
Tata Investment Corpn. Ltd.	2017	0.000530406	0	28966.9	114.075	1.18195e+07
Tata Motors Ltd.	2017	0.00376251	6.89406e+06	28966.9	114.075	1.18195e+07
Tata Power Co. Ltd.	2017	0.00133827	5.34732e+06	28966.9	114.075	1.18195e+07
Tata Steel Long Products Ltd.	2017	0.0017646	330228	28966.9	114.075	1.18195e+07
Tata Steel Ltd.	2017	-0.000435471	5.22835e+06	28966.9	114.075	1.18195e+07
Tata Teleservices (Maharashtra) Ltd.	2017	0.00085421	3.48066e+06	28966.9	114.075	1.18195e+07
Teamlease Services Ltd.	2017	0.0020998	20716.7	28966.9	114.075	1.18195e+07
Tech Mahindra Ltd.	2017	0.00240578	2.56326e+06	28966.9	114.075	1.18195e+07
Thermax Ltd.	2017	0.000650275	55848.2	28966.9	114.075	1.18195e+07
Thyrocare Technologies Ltd.	2017	0.00411828	37761.8	28966.9	114.075	1.18195e+07
Timken India Ltd.	2017	0.000101257	39234.9	28966.9	114.075	1.18195e+07
Titan Company Ltd.	2017	0.00187254	1.82816e+06	28966.9	114.075	1.18195e+07
Torrent Pharmaceuticals Ltd.	2017	-4.24573e-05	176938	28966.9	114.075	1.18195e+07
Torrent Power Ltd.	2017	0.00126657	1.1773e+06	28966.9	114.075	1.18195e+07
Trent Ltd.	2017	0.00363768	255246	28966.9	114.075	1.18195e+07
Trident Ltd.	2017	0.000231355	1.37791e+06	28966.9	114.075	1.18195e+07
Triveni Turbine Ltd.	2017	0.00186977	103376	28966.9	114.075	1.18195e+07
Tube Investments Of India Ltd.	2017	0.00208558	112582	28966.9	114.075	1.18195e+07
Tv18 Broadcast Ltd.	2017	0.00160797	7.12652e+06	28966.9	114.075	1.18195e+07
U P L Ltd.	2017	0.00042132	1.42652e+06	28966.9	114.075	1.18195e+07
Uco Bank	2017	0.00201515	920062	28966.9	114.075	1.18195e+07
Uflex Ltd.	2017	0.000613824	227019	28966.9	114.075	1.18195e+07
Ultratech Cement Ltd.	2017	-0.000558168	227503	28966.9	114.075	1.18195e+07
Union Bank Of India	2017	0.00226367	4.32042e+06	28966.9	114.075	1.18195e+07
United Breweries Ltd.	2017	0.00105409	285440	28966.9	114.075	1.18195e+07
United Spirits Ltd.	2017	0.000538832	498770	28966.9	114.075	1.18195e+07
V I P Industries Ltd.	2017	0.00127012	554735	28966.9	114.075	1.18195e+07
V-Guard Industries Ltd.	2017	0.0026272	1.06546e+06	28966.9	114.075	1.18195e+07
V-Mart Retail Ltd.	2017	0.0042257	61493.9	28966.9	114.075	1.18195e+07
Vaibhav Global Ltd.	2017	0.00296176	33887.4	28966.9	114.075	1.18195e+07
Vakrangee Ltd.	2017	0.00461367	1.5285e+06	28966.9	114.075	1.18195e+07
Vardhman Textiles Ltd.	2017	0.00355062	38832.4	28966.9	114.075	1.18195e+07
Varroc Engineering Ltd.	2017	0.0044985	0	28966.9	114.075	1.18195e+07
Varun Beverages Ltd.	2017	0.000833714	90331.8	28966.9	114.075	1.18195e+07
Vedanta Ltd.	2017	0.00187337	1.04787e+07	28966.9	114.075	1.18195e+07
Venky'S (India) Ltd.	2017	0.00164014	206092	28966.9	114.075	1.18195e+07
Vinati Organics Ltd.	2017	0.00731734	28571.1	28966.9	114.075	1.18195e+07
Vodafone Idea Ltd.	2017	0.00207516	1.76114e+07	28966.9	114.075	1.18195e+07
Voltas Ltd.	2017	0.00156305	1.5015e+06	28966.9	114.075	1.18195e+07
Wabco India Ltd.	2017	0.00273696	9001.22	28966.9	114.075	1.18195e+07
Welspun Corp Ltd.	2017	0.00135137	578798	28966.9	114.075	1.18195e+07
Welspun India Ltd.	2017	0.00233109	1.3908e+06	28966.9	114.075	1.18195e+07
Whirlpool Of India Ltd.	2017	0.000111656	57247.8	28966.9	114.075	1.18195e+07
Wipro Ltd.	2017	0.00216135	2.09088e+06	28966.9	114.075	1.18195e+07
Wockhardt Ltd.	2017	0.00119754	1.27838e+06	28966.9	114.075	1.18195e+07
Yes Bank Ltd.	2017	0.00135011	4.78001e+06	28966.9	114.075	1.18195e+07
Zee Entertainment Enterprises Ltd.	2017	0.00122506	1.99065e+06	28966.9	114.075	1.18195e+07
Zensar Technologies Ltd.	2017	0.000962108	18845.1	28966.9	114.075	1.18195e+07
Zydus Wellness Ltd.	2017	-0.000243349	7584.69	28966.9	114.075	1.18195e+07
3M India Ltd.	2018	0.000393289	2554.59	30613.6	118.942	1.25844e+07
A B B India Ltd.	2018	-0.000188511	98840.6	30613.6	118.942	1.25844e+07
A C C Ltd.	2018	-0.00058891	566324	30613.6	118.942	1.25844e+07
A I A Engineering Ltd.	2018	0.000385525	39006.4	30613.6	118.942	1.25844e+07
A P L Apollo Tubes Ltd.	2018	-0.00215571	36504.9	30613.6	118.942	1.25844e+07
A U Small Finance Bank Ltd.	2018	-0.000249016	388799	30613.6	118.942	1.25844e+07
Aarti Drugs Ltd.	2018	-0.000400595	24742.6	30613.6	118.942	1.25844e+07
Aarti Industries Ltd.	2018	0.000985466	41776.2	30613.6	118.942	1.25844e+07
Aavas Financiers Ltd.	2018	0	0	30613.6	118.942	1.25844e+07
Abbott India Ltd.	2018	0.00131174	7536.76	30613.6	118.942	1.25844e+07
Adani Enterprises Ltd.	2018	-7.25696e-05	9.97413e+06	30613.6	118.942	1.25844e+07
Adani Green Energy Ltd.	2018	0	0	30613.6	118.942	1.25844e+07
Adani Ports & Special Economic Zone Ltd.	2018	-0.000100453	3.36405e+06	30613.6	118.942	1.25844e+07
Adani Total Gas Ltd.	2018	0	0	30613.6	118.942	1.25844e+07
Adani Transmission Ltd.	2018	-0.000240652	1.08502e+06	30613.6	118.942	1.25844e+07
Aditya Birla Capital Ltd.	2018	-0.00250624	1.95613e+06	30613.6	118.942	1.25844e+07
Aditya Birla Fashion & Retail Ltd.	2018	0.000682712	1.01233e+06	30613.6	118.942	1.25844e+07
Advanced Enzyme Technologies Ltd.	2018	-0.00227272	243944	30613.6	118.942	1.25844e+07
Aegis Logistics Ltd.	2018	-0.00132142	150632	30613.6	118.942	1.25844e+07
Ajanta Pharma Ltd.	2018	-0.000880603	333810	30613.6	118.942	1.25844e+07
Alembic Pharmaceuticals Ltd.	2018	0.000529566	91637.8	30613.6	118.942	1.25844e+07
Alkem Laboratories Ltd.	2018	-0.00049221	47428.6	30613.6	118.942	1.25844e+07
Alkyl Amines Chemicals Ltd.	2018	0.000922298	8536.45	30613.6	118.942	1.25844e+07
Allcargo Logistics Ltd.	2018	-0.00259237	0	30613.6	118.942	1.25844e+07
Alok Industries Ltd.	2018	-0.000349359	3.95754e+06	30613.6	118.942	1.25844e+07
Amara Raja Batteries Ltd.	2018	-0.000449472	498374	30613.6	118.942	1.25844e+07
Amber Enterprises India Ltd.	2018	0	0	30613.6	118.942	1.25844e+07
Ambuja Cements Ltd.	2018	-0.000711389	3.14244e+06	30613.6	118.942	1.25844e+07
Apollo Hospitals Enterprise Ltd.	2018	0.000220207	592516	30613.6	118.942	1.25844e+07
Apollo Tyres Ltd.	2018	-0.000510921	2.9936e+06	30613.6	118.942	1.25844e+07
Asahi India Glass Ltd.	2018	-0.00148207	34202.7	30613.6	118.942	1.25844e+07
Ashok Leyland Ltd.	2018	-0.000752695	1.9527e+07	30613.6	118.942	1.25844e+07
Asian Paints Ltd.	2018	0.000746329	1.08536e+06	30613.6	118.942	1.25844e+07
Aster D M Healthcare Ltd.	2018	0	0	30613.6	118.942	1.25844e+07
Astral Ltd.	2018	0.00124697	64818.5	30613.6	118.942	1.25844e+07
Astrazeneca Pharma India Ltd.	2018	0.00081547	29971.6	30613.6	118.942	1.25844e+07
Atul Ltd.	2018	0.000956261	18200.4	30613.6	118.942	1.25844e+07
Aurobindo Pharma Ltd.	2018	0.000356554	2.89151e+06	30613.6	118.942	1.25844e+07
Avanti Feeds Ltd.	2018	-0.00327786	451797	30613.6	118.942	1.25844e+07
Avenue Supermarts Ltd.	2018	0.00132411	746261	30613.6	118.942	1.25844e+07
Axis Bank Ltd.	2018	0.000416726	9.12152e+06	30613.6	118.942	1.25844e+07
B A S F India Ltd.	2018	-0.001251	12992.1	30613.6	118.942	1.25844e+07
B E M L Ltd.	2018	-0.00225144	1.2408e+06	30613.6	118.942	1.25844e+07
B S E Ltd.	2018	-0.00183574	156907	30613.6	118.942	1.25844e+07
Bajaj Auto Ltd.	2018	-0.000779038	474808	30613.6	118.942	1.25844e+07
Bajaj Electricals Ltd.	2018	0.000120265	532146	30613.6	118.942	1.25844e+07
Bajaj Finance Ltd.	2018	0.00173863	1.71041e+06	30613.6	118.942	1.25844e+07
Bajaj Finserv Ltd.	2018	0.000970705	195679	30613.6	118.942	1.25844e+07
Bajaj Holdings & Invst. Ltd.	2018	0.000154762	25990.4	30613.6	118.942	1.25844e+07
Balaji Amines Ltd.	2018	-0.00127416	39942.4	30613.6	118.942	1.25844e+07
Balkrishna Industries Ltd.	2018	-0.000971257	660220	30613.6	118.942	1.25844e+07
Balrampur Chini Mills Ltd.	2018	-0.00115597	6.73046e+06	30613.6	118.942	1.25844e+07
Bandhan Bank Ltd.	2018	0	0	30613.6	118.942	1.25844e+07
Bank Of Baroda	2018	-0.00115787	1.78353e+07	30613.6	118.942	1.25844e+07
Bank Of India	2018	-0.0019286	9.06827e+06	30613.6	118.942	1.25844e+07
Bank Of Maharashtra	2018	-0.00175592	846821	30613.6	118.942	1.25844e+07
Bata India Ltd.	2018	0.00166061	930899	30613.6	118.942	1.25844e+07
Bayer Cropscience Ltd.	2018	-0.000231765	9195.73	30613.6	118.942	1.25844e+07
Berger Paints India Ltd.	2018	0.000906934	855148	30613.6	118.942	1.25844e+07
Bharat Dynamics Ltd.	2018	0	0	30613.6	118.942	1.25844e+07
Bharat Electronics Ltd.	2018	-0.00294843	8.12085e+06	30613.6	118.942	1.25844e+07
Bharat Forge Ltd.	2018	-0.00145736	1.23516e+06	30613.6	118.942	1.25844e+07
Bharat Heavy Electricals Ltd.	2018	-0.00119991	9.68138e+06	30613.6	118.942	1.25844e+07
Bharat Petroleum Corpn. Ltd.	2018	-0.00130282	5.64049e+06	30613.6	118.942	1.25844e+07
Bharti Airtel Ltd.	2018	-0.00204296	6.3195e+06	30613.6	118.942	1.25844e+07
Biocon Ltd.	2018	0.000607652	2.4953e+06	30613.6	118.942	1.25844e+07
Birla Corporation Ltd.	2018	-0.00291636	68756.5	30613.6	118.942	1.25844e+07
Birlasoft Ltd.	2018	0.000557481	2.27546e+06	30613.6	118.942	1.25844e+07
Blue Dart Express Ltd.	2018	-0.00125178	9181.72	30613.6	118.942	1.25844e+07
Blue Star Ltd.	2018	-0.00110663	65480.7	30613.6	118.942	1.25844e+07
Bombay Burmah Trdg. Corpn. Ltd.	2018	-0.000842911	243255	30613.6	118.942	1.25844e+07
Borosil Renewables Ltd.	2018	0	0	30613.6	118.942	1.25844e+07
Bosch Ltd.	2018	-2.28506e-05	19775.9	30613.6	118.942	1.25844e+07
Brigade Enterprises Ltd.	2018	-0.00139724	80723.4	30613.6	118.942	1.25844e+07
Brightcom Group Ltd.	2018	-0.00339832	0	30613.6	118.942	1.25844e+07
Britannia Industries Ltd.	2018	0.00118429	154566	30613.6	118.942	1.25844e+07
C C L Products (India) Ltd.	2018	-0.000432593	93110.6	30613.6	118.942	1.25844e+07
C E S C Ltd.	2018	-0.00184413	582863	30613.6	118.942	1.25844e+07
C G Power & Indl. Solutions Ltd.	2018	-0.00285601	5.15073e+06	30613.6	118.942	1.25844e+07
Cadila Healthcare Ltd.	2018	-0.000838736	1.51433e+06	30613.6	118.942	1.25844e+07
Can Fin Homes Ltd.	2018	-0.00200971	1.30793e+06	30613.6	118.942	1.25844e+07
Canara Bank	2018	-0.00100333	7.00446e+06	30613.6	118.942	1.25844e+07
Caplin Point Laboratories Ltd.	2018	-0.0020463	53180.2	30613.6	118.942	1.25844e+07
Carborundum Universal Ltd.	2018	-0.00021463	77715.8	30613.6	118.942	1.25844e+07
Castrol India Ltd.	2018	-0.000953851	1.51285e+06	30613.6	118.942	1.25844e+07
Ceat Ltd.	2018	-0.0015645	615203	30613.6	118.942	1.25844e+07
Central Bank Of India	2018	-0.00290816	1.20171e+06	30613.6	118.942	1.25844e+07
Central Depository Services (India) Ltd.	2018	-0.00184915	394797	30613.6	118.942	1.25844e+07
Century Plyboards (India) Ltd.	2018	-0.00262039	255336	30613.6	118.942	1.25844e+07
Century Textiles & Inds. Ltd.	2018	-0.00171268	680462	30613.6	118.942	1.25844e+07
Cera Sanitaryware Ltd.	2018	-0.0018865	9918.04	30613.6	118.942	1.25844e+07
Chambal Fertilisers & Chemicals Ltd.	2018	-0.000251279	631098	30613.6	118.942	1.25844e+07
Cholamandalam Financial Holdings Ltd.	2018	-0.00116538	72812.8	30613.6	118.942	1.25844e+07
Cholamandalam Investment & Finance Co. Ltd.	2018	-0.000116738	324304	30613.6	118.942	1.25844e+07
Cipla Ltd.	2018	-0.000638126	2.35229e+06	30613.6	118.942	1.25844e+07
City Union Bank Ltd.	2018	0.000774081	772912	30613.6	118.942	1.25844e+07
Coal India Ltd.	2018	-0.000466862	4.60857e+06	30613.6	118.942	1.25844e+07
Cochin Shipyard Ltd.	2018	-0.00153007	130044	30613.6	118.942	1.25844e+07
Coforge Ltd.	2018	0.00236367	1.35251e+06	30613.6	118.942	1.25844e+07
Colgate-Palmolive (India) Ltd.	2018	0.000810259	416418	30613.6	118.942	1.25844e+07
Container Corpn. Of India Ltd.	2018	6.76504e-05	559472	30613.6	118.942	1.25844e+07
Coromandel International Ltd.	2018	-0.000758787	173255	30613.6	118.942	1.25844e+07
Creditaccess Grameen Ltd.	2018	0	0	30613.6	118.942	1.25844e+07
Crisil Ltd.	2018	-0.000635527	18189.1	30613.6	118.942	1.25844e+07
Crompton Greaves Consumer Electricals Ltd.	2018	-0.000802181	780836	30613.6	118.942	1.25844e+07
Cummins India Ltd.	2018	-0.000333281	454232	30613.6	118.942	1.25844e+07
Cyient Ltd.	2018	0.000304178	358225	30613.6	118.942	1.25844e+07
D C M Shriram Ltd.	2018	-0.00186878	286070	30613.6	118.942	1.25844e+07
D L F Ltd.	2018	-0.00145402	6.68824e+06	30613.6	118.942	1.25844e+07
Dabur India Ltd.	2018	0.000853986	2.41597e+06	30613.6	118.942	1.25844e+07
Dalmia Bharat Ltd.	2018	0	0	30613.6	118.942	1.25844e+07
Deepak Nitrite Ltd.	2018	-0.000210485	325538	30613.6	118.942	1.25844e+07
Delta Corp Ltd.	2018	-0.000666733	2.46569e+06	30613.6	118.942	1.25844e+07
Dhani Services Ltd.	2018	0.0016885	1.56348e+06	30613.6	118.942	1.25844e+07
Dilip Buildcon Ltd.	2018	-0.00344569	418306	30613.6	118.942	1.25844e+07
Divi'S Laboratories Ltd.	2018	0.0012847	876469	30613.6	118.942	1.25844e+07
Dixon Technologies (India) Ltd.	2018	-0.00282879	30394.3	30613.6	118.942	1.25844e+07
Dr. Lal Pathlabs Ltd.	2018	0.00012677	85576.5	30613.6	118.942	1.25844e+07
Dr. Reddy'S Laboratories Ltd.	2018	0.00033554	826295	30613.6	118.942	1.25844e+07
E I D-Parry (India) Ltd.	2018	-0.00248475	189556	30613.6	118.942	1.25844e+07
E I H Ltd.	2018	0.0012263	277392	30613.6	118.942	1.25844e+07
E P L Ltd.	2018	-0.00114947	98727	30613.6	118.942	1.25844e+07
Eclerx Services Ltd.	2018	-0.00152837	25654.8	30613.6	118.942	1.25844e+07
Edelweiss Financial Services Ltd.	2018	-0.00182576	2.43217e+06	30613.6	118.942	1.25844e+07
Eicher Motors Ltd.	2018	-0.000867889	63621.4	30613.6	118.942	1.25844e+07
Elgi Equipments Ltd.	2018	-0.000574776	72869.4	30613.6	118.942	1.25844e+07
Emami Ltd.	2018	-0.00180626	258332	30613.6	118.942	1.25844e+07
Endurance Technologies Ltd.	2018	-0.000265411	52980.5	30613.6	118.942	1.25844e+07
Engineers India Ltd.	2018	-0.001792	2.06064e+06	30613.6	118.942	1.25844e+07
Equitas Holdings Ltd.	2018	-0.000633351	2.82074e+06	30613.6	118.942	1.25844e+07
Eris Lifesciences Ltd.	2018	-0.000509994	60276.9	30613.6	118.942	1.25844e+07
Escorts Ltd.	2018	-0.000366661	1.4245e+06	30613.6	118.942	1.25844e+07
Exide Industries Ltd.	2018	0.000770225	1.94567e+06	30613.6	118.942	1.25844e+07
F D C Ltd.	2018	-0.00141074	68914.5	30613.6	118.942	1.25844e+07
Federal Bank Ltd.	2018	-0.000581856	1.28634e+07	30613.6	118.942	1.25844e+07
Fertilisers & Chemicals, Travancore Ltd.	2018	-0.0011142	169325	30613.6	118.942	1.25844e+07
Fine Organic Inds. Ltd.	2018	0	0	30613.6	118.942	1.25844e+07
Finolex Cables Ltd.	2018	-0.0016886	64860.4	30613.6	118.942	1.25844e+07
Finolex Industries Ltd.	2018	-0.000752885	57047.1	30613.6	118.942	1.25844e+07
Firstsource Solutions Ltd.	2018	0.000621576	5.86061e+06	30613.6	118.942	1.25844e+07
Fortis Healthcare Ltd.	2018	-0.000392697	8.507e+06	30613.6	118.942	1.25844e+07
G A I L (India) Ltd.	2018	-0.000116333	4.39536e+06	30613.6	118.942	1.25844e+07
G M M Pfaudler Ltd.	2018	0	0	30613.6	118.942	1.25844e+07
Galaxy Surfactants Ltd.	2018	0	0	30613.6	118.942	1.25844e+07
Garware Technical Fibres Ltd.	2018	0.00113475	16062.6	30613.6	118.942	1.25844e+07
General Insurance Corpn. Of India	2018	-0.00157304	103016	30613.6	118.942	1.25844e+07
Glaxosmithkline Pharmaceuticals Ltd.	2018	0.000838196	17060.1	30613.6	118.942	1.25844e+07
Glenmark Pharmaceuticals Ltd.	2018	0.000635143	999486	30613.6	118.942	1.25844e+07
Godfrey Phillips India Ltd.	2018	-0.000430105	156517	30613.6	118.942	1.25844e+07
Godrej Agrovet Ltd.	2018	-0.00071804	179363	30613.6	118.942	1.25844e+07
Godrej Consumer Products Ltd.	2018	0.000870583	704827	30613.6	118.942	1.25844e+07
Godrej Industries Ltd.	2018	-0.000391529	503447	30613.6	118.942	1.25844e+07
Godrej Properties Ltd.	2018	-0.000305543	194441	30613.6	118.942	1.25844e+07
Granules India Ltd.	2018	-0.00163386	3.23491e+06	30613.6	118.942	1.25844e+07
Graphite India Ltd.	2018	-0.000172278	1.47161e+06	30613.6	118.942	1.25844e+07
Grasim Industries Ltd.	2018	-0.00131007	1.0553e+06	30613.6	118.942	1.25844e+07
Great Eastern Shipping Co. Ltd.	2018	-0.000972095	95327.2	30613.6	118.942	1.25844e+07
Grindwell Norton Ltd.	2018	0.000152803	33778.3	30613.6	118.942	1.25844e+07
Gujarat Alkalies & Chemicals Ltd.	2018	-0.00125495	104343	30613.6	118.942	1.25844e+07
Gujarat Ambuja Exports Ltd.	2018	0.000844739	120414	30613.6	118.942	1.25844e+07
Gujarat Gas Ltd.	2018	-0.000952636	42848.8	30613.6	118.942	1.25844e+07
Gujarat Narmada Valley Fertilizers & Chemicals Ltd.	2018	-0.00139712	973374	30613.6	118.942	1.25844e+07
Gujarat Pipavav Port Ltd.	2018	-0.00121913	432205	30613.6	118.942	1.25844e+07
Gujarat State Fertilizers & Chemicals Ltd.	2018	-0.000953005	1.84787e+06	30613.6	118.942	1.25844e+07
Gujarat State Petronet Ltd.	2018	-0.000960139	530978	30613.6	118.942	1.25844e+07
H C L Technologies Ltd.	2018	0.000313423	2.11487e+06	30613.6	118.942	1.25844e+07
H D F C Asset Mgmt. Co. Ltd.	2018	0	0	30613.6	118.942	1.25844e+07
H D F C Bank Ltd.	2018	0.000508247	2.43942e+06	30613.6	118.942	1.25844e+07
H D F C Life Insurance Co. Ltd.	2018	-8.67422e-05	1.60561e+06	30613.6	118.942	1.25844e+07
H E G Ltd.	2018	0.00151516	399020	30613.6	118.942	1.25844e+07
H F C L Ltd.	2018	-0.00169273	6.37884e+06	30613.6	118.942	1.25844e+07
Hathway Cable & Datacom Ltd.	2018	-0.00100618	2.03347e+06	30613.6	118.942	1.25844e+07
Hatsun Agro Products Ltd.	2018	-0.00110972	23640.5	30613.6	118.942	1.25844e+07
Havells India Ltd.	2018	0.000936217	1.34367e+06	30613.6	118.942	1.25844e+07
Hero Motocorp Ltd.	2018	-0.000761554	415812	30613.6	118.942	1.25844e+07
Hikal Ltd.	2018	-6.7469e-05	342082	30613.6	118.942	1.25844e+07
Hindalco Industries Ltd.	2018	-0.000748028	1.03708e+07	30613.6	118.942	1.25844e+07
Hinduja Global Solutions Ltd.	2018	-0.00129492	21292.3	30613.6	118.942	1.25844e+07
Hindustan Aeronautics Ltd.	2018	0	0	30613.6	118.942	1.25844e+07
Hindustan Copper Ltd.	2018	-0.00253278	1.86572e+06	30613.6	118.942	1.25844e+07
Hindustan Petroleum Corpn. Ltd.	2018	-0.0019226	6.87842e+06	30613.6	118.942	1.25844e+07
Hindustan Unilever Ltd.	2018	0.00124805	1.34033e+06	30613.6	118.942	1.25844e+07
Hindustan Zinc Ltd.	2018	-0.000425522	1.79168e+06	30613.6	118.942	1.25844e+07
Honeywell Automation India Ltd.	2018	0.000626341	1544.43	30613.6	118.942	1.25844e+07
Housing & Urban Devp. Corpn. Ltd.	2018	-0.00262879	1.37027e+06	30613.6	118.942	1.25844e+07
Housing Development Finance Corpn. Ltd.	2018	0.000588038	2.91856e+06	30613.6	118.942	1.25844e+07
I C I C I Bank Ltd.	2018	0.000613482	2.05541e+07	30613.6	118.942	1.25844e+07
I C I C I Lombard General Insurance Co. Ltd.	2018	0.000314712	301626	30613.6	118.942	1.25844e+07
I C I C I Prudential Life Insurance Co. Ltd.	2018	-0.000590137	1.52683e+06	30613.6	118.942	1.25844e+07
I C I C I Securities Ltd.	2018	0	0	30613.6	118.942	1.25844e+07
I D B I Bank Ltd.	2018	0.000124673	1.77908e+07	30613.6	118.942	1.25844e+07
I D F C First Bank Ltd.	2018	-0.000889232	1.25176e+07	30613.6	118.942	1.25844e+07
I D F C Ltd.	2018	-0.0014049	5.2344e+06	30613.6	118.942	1.25844e+07
I F B Industries Ltd.	2018	-0.00183611	16462.9	30613.6	118.942	1.25844e+07
I I F L Finance Ltd.	2018	-0.00101842	245441	30613.6	118.942	1.25844e+07
I R B Infrastructure Developers Ltd.	2018	-0.00135253	2.20071e+06	30613.6	118.942	1.25844e+07
I T C Ltd.	2018	0.000313427	1.16095e+07	30613.6	118.942	1.25844e+07
I T I Ltd.	2018	-0.00176499	1.0826e+06	30613.6	118.942	1.25844e+07
India Cements Ltd.	2018	-0.00255335	4.7411e+06	30613.6	118.942	1.25844e+07
Indiabulls Housing Finance Ltd.	2018	-0.00132731	3.88683e+06	30613.6	118.942	1.25844e+07
Indiabulls Real Estate Ltd.	2018	-0.00366623	5.99733e+06	30613.6	118.942	1.25844e+07
Indian Bank	2018	-0.00176044	1.72462e+06	30613.6	118.942	1.25844e+07
Indian Energy Exchange Ltd.	2018	0.000126996	54602.5	30613.6	118.942	1.25844e+07
Indian Hotels Co. Ltd.	2018	0.000895255	1234228	30613.6	118.942	1.25844e+07
Indian Oil Corpn. Ltd.	2018	-0.00139585	1.06043e+07	30613.6	118.942	1.25844e+07
Indian Overseas Bank	2018	-0.00163461	822124	30613.6	118.942	1.25844e+07
Indo Count Inds. Ltd.	2018	-0.00300637	595028	30613.6	118.942	1.25844e+07
Indoco Remedies Ltd.	2018	-0.00105256	119699	30613.6	118.942	1.25844e+07
Indraprastha Gas Ltd.	2018	-0.000920906	2.33504e+06	30613.6	118.942	1.25844e+07
Indus Towers Ltd.	2018	-0.00154545	3.09262e+06	30613.6	118.942	1.25844e+07
Indusind Bank Ltd.	2018	-0.000111934	1.54497e+06	30613.6	118.942	1.25844e+07
Infibeam Avenues Ltd.	2018	-0.00448528	1.15949e+07	30613.6	118.942	1.25844e+07
Info Edge (India) Ltd.	2018	0.00027927	131670	30613.6	118.942	1.25844e+07
Infosys Ltd.	2018	0.00100314	5.74645e+06	30613.6	118.942	1.25844e+07
Inox Leisure Ltd.	2018	-0.000516327	194514	30613.6	118.942	1.25844e+07
Intellect Design Arena Ltd.	2018	0.00135585	627305	30613.6	118.942	1.25844e+07
Interglobe Aviation Ltd.	2018	-0.000124892	1.23894e+06	30613.6	118.942	1.25844e+07
Ipca Laboratories Ltd.	2018	0.0012654	192238	30613.6	118.942	1.25844e+07
Ircon International Ltd.	2018	0	0	30613.6	118.942	1.25844e+07
J B Chemicals & Pharmaceuticals Ltd.	2018	-0.000292843	77313.3	30613.6	118.942	1.25844e+07
J K Cement Ltd.	2018	-0.00181154	37442.5	30613.6	118.942	1.25844e+07
J K Lakshmi Cement Ltd.	2018	-0.00166024	85127.1	30613.6	118.942	1.25844e+07
J K Paper Ltd.	2018	0.000440007	1.10789e+06	30613.6	118.942	1.25844e+07
J M Financial Ltd.	2018	-0.00206699	1.10577e+06	30613.6	118.942	1.25844e+07
J S W Energy Ltd.	2018	-0.00109399	2.11693e+06	30613.6	118.942	1.25844e+07
J S W Steel Ltd.	2018	0.000601637	5.32103e+06	30613.6	118.942	1.25844e+07
Jamna Auto Inds. Ltd.	2018	-0.00093082	1.43493e+06	30613.6	118.942	1.25844e+07
Jindal Stainless (Hisar) Ltd.	2018	-0.00355478	558278	30613.6	118.942	1.25844e+07
Jindal Stainless Ltd.	2018	-0.0046347	595745	30613.6	118.942	1.25844e+07
Jindal Steel & Power Ltd.	2018	-0.000852989	1.09228e+07	30613.6	118.942	1.25844e+07
Jubilant Foodworks Ltd.	2018	0.00135922	1.39016e+06	30613.6	118.942	1.25844e+07
Jubilant Pharmova Ltd.	2018	-0.000255248	584361	30613.6	118.942	1.25844e+07
Just Dial Ltd.	2018	-0.000122878	3.48139e+06	30613.6	118.942	1.25844e+07
Jyothy Labs Ltd.	2018	0.000482551	224344	30613.6	118.942	1.25844e+07
K E C International Ltd.	2018	-0.000956279	558132	30613.6	118.942	1.25844e+07
K N R Constructions Ltd.	2018	-0.00152169	178495	30613.6	118.942	1.25844e+07
K P R Mill Ltd.	2018	-0.00149571	34643	30613.6	118.942	1.25844e+07
K R B L Ltd.	2018	-0.0030756	250683	30613.6	118.942	1.25844e+07
Kajaria Ceramics Ltd.	2018	-0.00149878	582094	30613.6	118.942	1.25844e+07
Kalpataru Power Transmission Ltd.	2018	-0.000784616	105703	30613.6	118.942	1.25844e+07
Kansai Nerolac Paints Ltd.	2018	-0.000562642	210857	30613.6	118.942	1.25844e+07
Karur Vysya Bank Ltd.	2018	-0.000884737	1.27978e+06	30613.6	118.942	1.25844e+07
Kei Industries Ltd.	2018	-0.000159782	234687	30613.6	118.942	1.25844e+07
Kotak Mahindra Bank Ltd.	2018	0.000915184	2.57955e+06	30613.6	118.942	1.25844e+07
L & T Finance Holdings Ltd.	2018	-0.000456777	6.54629e+06	30613.6	118.942	1.25844e+07
L & T Technology Services Ltd.	2018	0.00176904	122045	30613.6	118.942	1.25844e+07
L I C Housing Finance Ltd.	2018	-0.000573523	1.97959e+06	30613.6	118.942	1.25844e+07
Lakshmi Machine Works Ltd.	2018	-4.63438e-05	7207.52	30613.6	118.942	1.25844e+07
Larsen & Toubro Infotech Ltd.	2018	0.00166635	238548	30613.6	118.942	1.25844e+07
Larsen & Toubro Ltd.	2018	0.000569092	2.32692e+06	30613.6	118.942	1.25844e+07
Laurus Labs Ltd.	2018	-0.00140266	75877.1	30613.6	118.942	1.25844e+07
Linde India Ltd.	2018	0.00108772	71904.8	30613.6	118.942	1.25844e+07
Lupin Ltd.	2018	-0.000145884	2.37884e+06	30613.6	118.942	1.25844e+07
Lux Industries Ltd.	2018	-0.00040521	66550.8	30613.6	118.942	1.25844e+07
M M T C Ltd.	2018	-0.00173672	1.74477e+06	30613.6	118.942	1.25844e+07
M O I L Ltd.	2018	-0.00132154	336258	30613.6	118.942	1.25844e+07
M R F Ltd.	2018	-0.000250715	7051.83	30613.6	118.942	1.25844e+07
Mahanagar Gas Ltd.	2018	-0.000779431	530246	30613.6	118.942	1.25844e+07
Mahindra & Mahindra Financial Services Ltd.	2018	9.41277e-05	1.78273e+06	30613.6	118.942	1.25844e+07
Mahindra & Mahindra Ltd.	2018	0.00026618	2.63344e+06	30613.6	118.942	1.25844e+07
Mahindra C I E Automotive Ltd.	2018	0.000103324	456739	30613.6	118.942	1.25844e+07
Mahindra Holidays & Resorts India Ltd.	2018	-0.00184752	101612	30613.6	118.942	1.25844e+07
Mahindra Logistics Ltd.	2018	0.000578507	75032.8	30613.6	118.942	1.25844e+07
Manappuram Finance Ltd.	2018	-0.00101066	3.79182e+06	30613.6	118.942	1.25844e+07
Mangalore Refinery & Petrochemicals Ltd.	2018	-0.00206088	1.57845e+06	30613.6	118.942	1.25844e+07
Marico Ltd.	2018	0.000555583	1.65746e+06	30613.6	118.942	1.25844e+07
Maruti Suzuki India Ltd.	2018	-0.00100273	615955	30613.6	118.942	1.25844e+07
Mastek Ltd.	2018	0.000814592	268307	30613.6	118.942	1.25844e+07
Max Financial Services Ltd.	2018	-0.00110004	701815	30613.6	118.942	1.25844e+07
Minda Industries Ltd.	2018	-0.00111775	164149	30613.6	118.942	1.25844e+07
Mindtree Ltd.	2018	0.00145057	1.80432e+06	30613.6	118.942	1.25844e+07
Motilal Oswal Financial Services Ltd.	2018	-0.00314965	119277	30613.6	118.942	1.25844e+07
Mphasis Ltd.	2018	0.00132782	485488	30613.6	118.942	1.25844e+07
Multi Commodity Exchange Of India Ltd.	2018	-0.000861258	589877	30613.6	118.942	1.25844e+07
Muthoot Finance Ltd.	2018	0.000476725	1.01592e+06	30613.6	118.942	1.25844e+07
N B C C (India) Ltd.	2018	-0.0030329	4.73258e+06	30613.6	118.942	1.25844e+07
N C C Ltd.	2018	-0.00159329	8.1696e+06	30613.6	118.942	1.25844e+07
N H P C Ltd.	2018	-0.000824963	5.59426e+06	30613.6	118.942	1.25844e+07
N L C India Ltd.	2018	-0.00181126	538417	30613.6	118.942	1.25844e+07
N M D C Ltd.	2018	-0.00174022	3.72192e+06	30613.6	118.942	1.25844e+07
N T P C Ltd.	2018	-0.000741908	6.2091e+06	30613.6	118.942	1.25844e+07
Narayana Hrudayalaya Ltd.	2018	-0.00172937	77517.9	30613.6	118.942	1.25844e+07
Natco Pharma Ltd.	2018	-0.00143081	254033	30613.6	118.942	1.25844e+07
National Aluminium Co. Ltd.	2018	-0.00106462	9.47885e+06	30613.6	118.942	1.25844e+07
Navin Fluorine Intl. Ltd.	2018	-0.000599702	61730.1	30613.6	118.942	1.25844e+07
Nesco Ltd.	2018	-0.000731754	36431	30613.6	118.942	1.25844e+07
Nestle India Ltd.	2018	0.0013957	66678.9	30613.6	118.942	1.25844e+07
Network18 Media & Invst. Ltd.	2018	-0.00149597	1.024e+06	30613.6	118.942	1.25844e+07
New India Assurance Co. Ltd.	2018	-0.00218229	75605.6	30613.6	118.942	1.25844e+07
Nippon Life India Asset Mgmt. Ltd.	2018	-0.00241844	227477	30613.6	118.942	1.25844e+07
Nocil Ltd.	2018	-0.000388223	945788	30613.6	118.942	1.25844e+07
Oberoi Realty Ltd.	2018	-0.000349246	413828	30613.6	118.942	1.25844e+07
Oil & Natural Gas Corpn. Ltd.	2018	-0.00110762	7.75417e+06	30613.6	118.942	1.25844e+07
Oil India Ltd.	2018	-0.00144641	1.03114e+06	30613.6	118.942	1.25844e+07
Oracle Financial Services Software Ltd.	2018	-0.000308665	51271.6	30613.6	118.942	1.25844e+07
Orient Electric Ltd.	2018	0	0	30613.6	118.942	1.25844e+07
P C B L Ltd.	2018	7.28063e-05	931854	30613.6	118.942	1.25844e+07
P I Industries Ltd.	2018	-0.000359514	122868	30613.6	118.942	1.25844e+07
P N B Housing Finance Ltd.	2018	-0.00141939	299023	30613.6	118.942	1.25844e+07
P N C Infratech Ltd.	2018	-0.00143207	242052	30613.6	118.942	1.25844e+07
P V R Ltd.	2018	0.000546243	375129	30613.6	118.942	1.25844e+07
Page Industries Ltd.	2018	0.000135497	29103.8	30613.6	118.942	1.25844e+07
Persistent Systems Ltd.	2018	-0.000528791	235736	30613.6	118.942	1.25844e+07
Petronet L N G Ltd.	2018	-0.000488152	3.22822e+06	30613.6	118.942	1.25844e+07
Pfizer Ltd.	2018	0.00134654	40049	30613.6	118.942	1.25844e+07
Phoenix Mills Ltd.	2018	-0.000486159	115654	30613.6	118.942	1.25844e+07
Pidilite Industries Ltd.	2018	0.000893717	617603	30613.6	118.942	1.25844e+07
Piramal Enterprises Ltd.	2018	-0.000703634	366728	30613.6	118.942	1.25844e+07
Poly Medicure Ltd.	2018	-0.00093262	14218.8	30613.6	118.942	1.25844e+07
Polyplex Corporation Ltd.	2018	-0.000184127	55171.5	30613.6	118.942	1.25844e+07
Poonawalla Fincorp Ltd.	2018	-0.00161235	349281	30613.6	118.942	1.25844e+07
Power Finance Corpn. Ltd.	2018	-0.000574636	9.20778e+06	30613.6	118.942	1.25844e+07
Power Grid Corpn. Of India Ltd.	2018	-4.26117e-05	6.39277e+06	30613.6	118.942	1.25844e+07
Praj Industries Ltd.	2018	2.60223e-05	1.26384e+06	30613.6	118.942	1.25844e+07
Prestige Estates Projects Ltd.	2018	-0.001544	242253	30613.6	118.942	1.25844e+07
Prism Johnson Ltd.	2018	-0.00107252	692912	30613.6	118.942	1.25844e+07
Privi Speciality Chemicals Ltd.	2018	-0.00131788	0	30613.6	118.942	1.25844e+07
Procter & Gamble Health Ltd.	2018	0.00348811	49555	30613.6	118.942	1.25844e+07
Procter & Gamble Hygiene & Health Care Ltd.	2018	0.000209005	6070.5	30613.6	118.942	1.25844e+07
Punjab National Bank	2018	-0.00307481	3.17453e+07	30613.6	118.942	1.25844e+07
Quess Corp Ltd.	2018	-0.00235506	159051	30613.6	118.942	1.25844e+07
R B L Bank Ltd.	2018	0.000478749	1.45706e+06	30613.6	118.942	1.25844e+07
R E C Ltd.	2018	-0.0010371	6.15102e+06	30613.6	118.942	1.25844e+07
R H I Magnesita India Ltd.	2018	0.00140888	96643.5	30613.6	118.942	1.25844e+07
Radico Khaitan Ltd.	2018	0.00128179	1.12985e+06	30613.6	118.942	1.25844e+07
Rain Industries Ltd.	2018	-0.00444154	2.00227e+06	30613.6	118.942	1.25844e+07
Rajesh Exports Ltd.	2018	-0.00145257	460855	30613.6	118.942	1.25844e+07
Rallis India Ltd.	2018	-0.00160822	308561	30613.6	118.942	1.25844e+07
Ramco Cements Ltd.	2018	-0.000781285	294470	30613.6	118.942	1.25844e+07
Rashtriya Chemicals & Fertilizers Ltd.	2018	-0.00163338	2.32175e+06	30613.6	118.942	1.25844e+07
Ratnamani Metals & Tubes Ltd.	2018	-0.000591196	9147.01	30613.6	118.942	1.25844e+07
Rattanindia Enterprises Ltd.	2018	-0.003335	0	30613.6	118.942	1.25844e+07
Redington (India) Ltd.	2018	-0.003001	409901	30613.6	118.942	1.25844e+07
Relaxo Footwears Ltd.	2018	0.000358751	39409.7	30613.6	118.942	1.25844e+07
Reliance Industries Ltd.	2018	0.000843477	7.90315e+06	30613.6	118.942	1.25844e+07
Rites Ltd.	2018	0	0	30613.6	118.942	1.25844e+07
S B I Life Insurance Co. Ltd.	2018	-0.00055376	376508	30613.6	118.942	1.25844e+07
S I S Ltd.	2018	-0.00158981	21783	30613.6	118.942	1.25844e+07
S J V N Ltd.	2018	-0.00112545	1.04937e+06	30613.6	118.942	1.25844e+07
S K F India Ltd.	2018	0.000116864	16712.6	30613.6	118.942	1.25844e+07
S R F Ltd.	2018	0.000111598	348072	30613.6	118.942	1.25844e+07
Sanofi India Ltd.	2018	0.00125692	11121.6	30613.6	118.942	1.25844e+07
Saregama India Ltd.	2018	-0.00113032	0	30613.6	118.942	1.25844e+07
Schaeffler India Ltd.	2018	-3.68956e-05	6231.44	30613.6	118.942	1.25844e+07
Sequent Scientific Ltd.	2018	-0.00150887	627062	30613.6	118.942	1.25844e+07
Sheela Foam Ltd.	2018	-0.000582408	10028.7	30613.6	118.942	1.25844e+07
Shilpa Medicare Ltd.	2018	-0.00189619	40340.1	30613.6	118.942	1.25844e+07
Shipping Corpn. Of India Ltd.	2018	-0.00271075	754737	30613.6	118.942	1.25844e+07
Shree Cement Ltd.	2018	-0.000176363	23299.1	30613.6	118.942	1.25844e+07
Shree Renuka Sugars Ltd.	2018	-0.00189393	0	30613.6	118.942	1.25844e+07
Shriram City Union Finance Ltd.	2018	-0.00115022	29244	30613.6	118.942	1.25844e+07
Shriram Transport Finance Co. Ltd.	2018	-0.000673402	1.20147e+06	30613.6	118.942	1.25844e+07
Siemens Ltd.	2018	-0.000749613	369941	30613.6	118.942	1.25844e+07
Sobha Ltd.	2018	-0.00105042	264090	30613.6	118.942	1.25844e+07
Solar Industries India Ltd.	2018	-0.000303399	22277	30613.6	118.942	1.25844e+07
Solara Active Pharma Sciences Ltd.	2018	0	0	30613.6	118.942	1.25844e+07
Sonata Software Ltd.	2018	0.00040649	344914	30613.6	118.942	1.25844e+07
State Bank Of India	2018	-9.97398e-05	2.26562e+07	30613.6	118.942	1.25844e+07
Steel Authority Of India Ltd.	2018	-0.00198608	1.32648e+07	30613.6	118.942	1.25844e+07
Sterlite Technologies Ltd.	2018	3.82742e-05	1.47127e+06	30613.6	118.942	1.25844e+07
Strides Pharma Science Ltd.	2018	-0.00232519	2042538	30613.6	118.942	1.25844e+07
Sudarshan Chemical Inds. Ltd.	2018	-0.000578833	84437.4	30613.6	118.942	1.25844e+07
Sun Pharma Advanced Research Co. Ltd.	2018	-0.00390095	340619	30613.6	118.942	1.25844e+07
Sun Pharmaceutical Inds. Ltd.	2018	-0.00115632	7.60308e+06	30613.6	118.942	1.25844e+07
Sun T V Network Ltd.	2018	-0.0020048	1.57186e+06	30613.6	118.942	1.25844e+07
Sundaram Finance Ltd.	2018	-0.00103114	42318.8	30613.6	118.942	1.25844e+07
Sundram Fasteners Ltd.	2018	-0.000291741	128330	30613.6	118.942	1.25844e+07
Sunteck Realty Ltd.	2018	-0.000776545	262700	30613.6	118.942	1.25844e+07
Suprajit Engineering Ltd.	2018	-0.00148338	50848.7	30613.6	118.942	1.25844e+07
Supreme Industries Ltd.	2018	-0.000412606	84095.4	30613.6	118.942	1.25844e+07
Supreme Petrochem Ltd.	2018	-0.0025346	22661.6	30613.6	118.942	1.25844e+07
Suzlon Energy Ltd.	2018	-0.00437712	3.05378e+07	30613.6	118.942	1.25844e+07
Symphony Ltd.	2018	-0.00151476	39048.3	30613.6	118.942	1.25844e+07
Syngene International Ltd.	2018	3.22264e-18	125671	30613.6	118.942	1.25844e+07
T C I Express Ltd.	2018	0.000406707	28549.5	30613.6	118.942	1.25844e+07
T C N S Clothing Co. Ltd.	2018	0	0	30613.6	118.942	1.25844e+07
T T K Prestige Ltd.	2018	-0.000150331	5726.2	30613.6	118.942	1.25844e+07
T V S Motor Co. Ltd.	2018	-0.0012392	1.37401e+06	30613.6	118.942	1.25844e+07
Tanla Platforms Ltd.	2018	-0.000983664	354383	30613.6	118.942	1.25844e+07
Tata Chemicals Ltd.	2018	-0.00013242	690843	30613.6	118.942	1.25844e+07
Tata Coffee Ltd.	2018	-0.00214694	459546	30613.6	118.942	1.25844e+07
Tata Communications Ltd.	2018	-0.00100135	408167	30613.6	118.942	1.25844e+07
Tata Consultancy Services Ltd.	2018	0.00147925	2.58644e+06	30613.6	118.942	1.25844e+07
Tata Consumer Products Ltd.	2018	-0.00142024	3.04193e+06	30613.6	118.942	1.25844e+07
Tata Elxsi Ltd.	2018	0.000173145	733117	30613.6	118.942	1.25844e+07
Tata Investment Corpn. Ltd.	2018	6.83947e-07	0	30613.6	118.942	1.25844e+07
Tata Motors Ltd.	2018	-0.00379523	1.30367e+07	30613.6	118.942	1.25844e+07
Tata Power Co. Ltd.	2018	-0.00106082	5.83235e+06	30613.6	118.942	1.25844e+07
Tata Steel Long Products Ltd.	2018	-0.000614841	208955	30613.6	118.942	1.25844e+07
Tata Steel Ltd.	2018	-0.00130391	7.94491e+06	30613.6	118.942	1.25844e+07
Tata Teleservices (Maharashtra) Ltd.	2018	-0.00238938	910396	30613.6	118.942	1.25844e+07
Teamlease Services Ltd.	2018	0.000789151	34507.4	30613.6	118.942	1.25844e+07
Tech Mahindra Ltd.	2018	0.00138817	3.3199e+06	30613.6	118.942	1.25844e+07
Thermax Ltd.	2018	-0.000312447	57088.1	30613.6	118.942	1.25844e+07
Thyrocare Technologies Ltd.	2018	-0.000972038	50244.6	30613.6	118.942	1.25844e+07
Timken India Ltd.	2018	-0.0016636	30356.3	30613.6	118.942	1.25844e+07
Titan Company Ltd.	2018	0.000393273	2.82785e+06	30613.6	118.942	1.25844e+07
Torrent Pharmaceuticals Ltd.	2018	0.000970748	239115	30613.6	118.942	1.25844e+07
Torrent Power Ltd.	2018	-0.000241872	1.202e+06	30613.6	118.942	1.25844e+07
Trent Ltd.	2018	0.000415474	131895	30613.6	118.942	1.25844e+07
Trident Ltd.	2018	-0.00116331	749196	30613.6	118.942	1.25844e+07
Triveni Turbine Ltd.	2018	-0.000643411	99529.6	30613.6	118.942	1.25844e+07
Tube Investments Of India Ltd.	2018	0.00115482	73735.3	30613.6	118.942	1.25844e+07
Tv18 Broadcast Ltd.	2018	-0.00183201	6.32265e+06	30613.6	118.942	1.25844e+07
U P L Ltd.	2018	-8.06562e-05	2.05221e+06	30613.6	118.942	1.25844e+07
Uco Bank	2018	-0.00162816	975932	30613.6	118.942	1.25844e+07
Uflex Ltd.	2018	-0.0021561	150354	30613.6	118.942	1.25844e+07
Ultratech Cement Ltd.	2018	-0.000257848	284662	30613.6	118.942	1.25844e+07
Union Bank Of India	2018	-0.00204183	8.5881e+06	30613.6	118.942	1.25844e+07
United Breweries Ltd.	2018	0.00117752	605528	30613.6	118.942	1.25844e+07
United Spirits Ltd.	2018	-0.000496514	1.05458e+06	30613.6	118.942	1.25844e+07
V I P Industries Ltd.	2018	0.00161433	556991	30613.6	118.942	1.25844e+07
V-Guard Industries Ltd.	2018	-0.000148695	1.00892e+06	30613.6	118.942	1.25844e+07
V-Mart Retail Ltd.	2018	0.0022801	30417.3	30613.6	118.942	1.25844e+07
Vaibhav Global Ltd.	2018	5.12293e-06	26072.8	30613.6	118.942	1.25844e+07
Vakrangee Ltd.	2018	-0.0103051	7.93028e+06	30613.6	118.942	1.25844e+07
Vardhman Textiles Ltd.	2018	-0.00100771	34467.9	30613.6	118.942	1.25844e+07
Varroc Engineering Ltd.	2018	0	0	30613.6	118.942	1.25844e+07
Varun Beverages Ltd.	2018	0.000448791	121150	30613.6	118.942	1.25844e+07
Vedanta Ltd.	2018	-0.00196339	1.33183e+07	30613.6	118.942	1.25844e+07
Venky'S (India) Ltd.	2018	-0.000599015	164752	30613.6	118.942	1.25844e+07
Vinati Organics Ltd.	2018	0.00207055	26997	30613.6	118.942	1.25844e+07
Vodafone Idea Ltd.	2018	-0.00398845	1.93447e+07	30613.6	118.942	1.25844e+07
Voltas Ltd.	2018	-0.000637002	1.49807e+06	30613.6	118.942	1.25844e+07
Wabco India Ltd.	2018	-0.000141758	4747.84	30613.6	118.942	1.25844e+07
Welspun Corp Ltd.	2018	9.89541e-05	703554	30613.6	118.942	1.25844e+07
Welspun India Ltd.	2018	-0.000737744	2.21312e+06	30613.6	118.942	1.25844e+07
Whirlpool Of India Ltd.	2018	-0.000569326	51507.5	30613.6	118.942	1.25844e+07
Wipro Ltd.	2018	0.000152219	3.59364e+06	30613.6	118.942	1.25844e+07
Wockhardt Ltd.	2018	-0.00221948	1.56995e+06	30613.6	118.942	1.25844e+07
Yes Bank Ltd.	2018	-0.00219095	2.82134e+07	30613.6	118.942	1.25844e+07
Zee Entertainment Enterprises Ltd.	2018	-0.000786466	2.43405e+06	30613.6	118.942	1.25844e+07
Zensar Technologies Ltd.	2018	0.00123137	64028.2	30613.6	118.942	1.25844e+07
Zydus Wellness Ltd.	2018	0.00118136	19134.8	30613.6	118.942	1.25844e+07
3M India Ltd.	2019	0.00026085	4892.52	34862.5	121.183	1.31079e+07
A B B India Ltd.	2019	-0.000106572	104637	34862.5	121.183	1.31079e+07
A C C Ltd.	2019	-0.000106728	772775	34862.5	121.183	1.31079e+07
A I A Engineering Ltd.	2019	-7.54015e-06	26427.8	34862.5	121.183	1.31079e+07
A P L Apollo Tubes Ltd.	2019	0.00179763	27917.1	34862.5	121.183	1.31079e+07
A U Small Finance Bank Ltd.	2019	0.00105452	338396	34862.5	121.183	1.31079e+07
Aarti Drugs Ltd.	2019	2.94173e-05	17161.4	34862.5	121.183	1.31079e+07
Aarti Industries Ltd.	2019	0.000553767	99314.1	34862.5	121.183	1.31079e+07
Aavas Financiers Ltd.	2019	0.00349891	0	34862.5	121.183	1.31079e+07
Abbott India Ltd.	2019	0.00225403	7945.8	34862.5	121.183	1.31079e+07
Adani Enterprises Ltd.	2019	0.00121128	5.44429e+06	34862.5	121.183	1.31079e+07
Adani Green Energy Ltd.	2019	0.00570396	0	34862.5	121.183	1.31079e+07
Adani Ports & Special Economic Zone Ltd.	2019	-0.000167156	3.75738e+06	34862.5	121.183	1.31079e+07
Adani Total Gas Ltd.	2019	0.00196836	0	34862.5	121.183	1.31079e+07
Adani Transmission Ltd.	2019	0.00205005	246258	34862.5	121.183	1.31079e+07
Aditya Birla Capital Ltd.	2019	0.00013947	2.49764e+06	34862.5	121.183	1.31079e+07
Aditya Birla Fashion & Retail Ltd.	2019	0.000692281	628762	34862.5	121.183	1.31079e+07
Advanced Enzyme Technologies Ltd.	2019	-0.000227815	192791	34862.5	121.183	1.31079e+07
Aegis Logistics Ltd.	2019	-0.000215738	149290	34862.5	121.183	1.31079e+07
Ajanta Pharma Ltd.	2019	-0.000726296	276891	34862.5	121.183	1.31079e+07
Alembic Pharmaceuticals Ltd.	2019	-6.48539e-05	64012.1	34862.5	121.183	1.31079e+07
Alkem Laboratories Ltd.	2019	0.00012941	42955.7	34862.5	121.183	1.31079e+07
Alkyl Amines Chemicals Ltd.	2019	0.00132701	9757.42	34862.5	121.183	1.31079e+07
Allcargo Logistics Ltd.	2019	-0.000442171	0	34862.5	121.183	1.31079e+07
Alok Industries Ltd.	2019	-0.00115745	3.2074e+06	34862.5	121.183	1.31079e+07
Amara Raja Batteries Ltd.	2019	-5.15145e-05	647038	34862.5	121.183	1.31079e+07
Amber Enterprises India Ltd.	2019	0.000882436	0	34862.5	121.183	1.31079e+07
Ambuja Cements Ltd.	2019	-0.000446751	2.95145e+06	34862.5	121.183	1.31079e+07
Apollo Hospitals Enterprise Ltd.	2019	0.000554742	731021	34862.5	121.183	1.31079e+07
Apollo Tyres Ltd.	2019	-0.00139801	2.71607e+06	34862.5	121.183	1.31079e+07
Asahi India Glass Ltd.	2019	-0.0010604	32336	34862.5	121.183	1.31079e+07
Ashok Leyland Ltd.	2019	-0.000832927	2.66579e+07	34862.5	121.183	1.31079e+07
Asian Paints Ltd.	2019	0.00104048	1.32177e+06	34862.5	121.183	1.31079e+07
Aster D M Healthcare Ltd.	2019	1.9088e-05	0	34862.5	121.183	1.31079e+07
Astral Ltd.	2019	0.00103708	103738	34862.5	121.183	1.31079e+07
Astrazeneca Pharma India Ltd.	2019	0.00249837	22350.9	34862.5	121.183	1.31079e+07
Atul Ltd.	2019	0.000639797	17041.6	34862.5	121.183	1.31079e+07
Aurobindo Pharma Ltd.	2019	-0.0018813	3.08496e+06	34862.5	121.183	1.31079e+07
Avanti Feeds Ltd.	2019	0.00177122	509412	34862.5	121.183	1.31079e+07
Avenue Supermarts Ltd.	2019	0.000669479	509643	34862.5	121.183	1.31079e+07
Axis Bank Ltd.	2019	0.000798877	1.0012e+07	34862.5	121.183	1.31079e+07
B A S F India Ltd.	2019	-0.00179575	14286.9	34862.5	121.183	1.31079e+07
B E M L Ltd.	2019	0.000261653	1.35519e+06	34862.5	121.183	1.31079e+07
B S E Ltd.	2019	-0.000722747	100194	34862.5	121.183	1.31079e+07
Bajaj Auto Ltd.	2019	0.000686399	497954	34862.5	121.183	1.31079e+07
Bajaj Electricals Ltd.	2019	-0.00141337	178191	34862.5	121.183	1.31079e+07
Bajaj Finance Ltd.	2019	0.00196908	1.61431e+06	34862.5	121.183	1.31079e+07
Bajaj Finserv Ltd.	2019	0.00157636	275109	34862.5	121.183	1.31079e+07
Bajaj Holdings & Invst. Ltd.	2019	0.000587248	37710	34862.5	121.183	1.31079e+07
Balaji Amines Ltd.	2019	-0.000527162	38688.8	34862.5	121.183	1.31079e+07
Balkrishna Industries Ltd.	2019	0.000335884	615235	34862.5	121.183	1.31079e+07
Balrampur Chini Mills Ltd.	2019	0.00229585	1.90795e+06	34862.5	121.183	1.31079e+07
Bandhan Bank Ltd.	2019	-0.000338148	0	34862.5	121.183	1.31079e+07
Bank Of Baroda	2019	-0.000645177	2.33062e+07	34862.5	121.183	1.31079e+07
Bank Of India	2019	-0.00162392	8.99571e+06	34862.5	121.183	1.31079e+07
Bank Of Maharashtra	2019	-0.000788749	940050	34862.5	121.183	1.31079e+07
Bata India Ltd.	2019	0.00185427	756779	34862.5	121.183	1.31079e+07
Bayer Cropscience Ltd.	2019	-0.000671194	7506.18	34862.5	121.183	1.31079e+07
Berger Paints India Ltd.	2019	0.00185452	1.34964e+06	34862.5	121.183	1.31079e+07
Bharat Dynamics Ltd.	2019	0.000182129	0	34862.5	121.183	1.31079e+07
Bharat Electronics Ltd.	2019	0.000445711	1.05823e+07	34862.5	121.183	1.31079e+07
Bharat Forge Ltd.	2019	-9.80757e-05	1.47534e+06	34862.5	121.183	1.31079e+07
Bharat Heavy Electricals Ltd.	2019	-0.00211775	1.47535e+07	34862.5	121.183	1.31079e+07
Bharat Petroleum Corpn. Ltd.	2019	0.00129457	6.93843e+06	34862.5	121.183	1.31079e+07
Bharti Airtel Ltd.	2019	0.00188705	9.87554e+06	34862.5	121.183	1.31079e+07
Biocon Ltd.	2019	-0.000238855	2.84872e+06	34862.5	121.183	1.31079e+07
Birla Corporation Ltd.	2019	0.00013154	79684.4	34862.5	121.183	1.31079e+07
Birlasoft Ltd.	2019	-0.00455945	1.54321e+06	34862.5	121.183	1.31079e+07
Blue Dart Express Ltd.	2019	-0.00176546	6791.88	34862.5	121.183	1.31079e+07
Blue Star Ltd.	2019	0.00122788	77524.5	34862.5	121.183	1.31079e+07
Bombay Burmah Trdg. Corpn. Ltd.	2019	-0.000931363	134248	34862.5	121.183	1.31079e+07
Borosil Renewables Ltd.	2019	-0.00168427	0	34862.5	121.183	1.31079e+07
Bosch Ltd.	2019	-0.000965545	17389.6	34862.5	121.183	1.31079e+07
Brigade Enterprises Ltd.	2019	0.0017398	125002	34862.5	121.183	1.31079e+07
Brightcom Group Ltd.	2019	0.00369472	0	34862.5	121.183	1.31079e+07
Britannia Industries Ltd.	2019	-0.000118313	440846	34862.5	121.183	1.31079e+07
C C L Products (India) Ltd.	2019	-0.00119847	65495.2	34862.5	121.183	1.31079e+07
C E S C Ltd.	2019	0.000406842	393039	34862.5	121.183	1.31079e+07
C G Power & Indl. Solutions Ltd.	2019	-0.00576558	8.01171e+06	34862.5	121.183	1.31079e+07
Cadila Healthcare Ltd.	2019	-0.00126567	1.72364e+06	34862.5	121.183	1.31079e+07
Can Fin Homes Ltd.	2019	0.00137118	844625	34862.5	121.183	1.31079e+07
Canara Bank	2019	-0.000891753	6.56062e+06	34862.5	121.183	1.31079e+07
Caplin Point Laboratories Ltd.	2019	-0.000982736	48295.1	34862.5	121.183	1.31079e+07
Carborundum Universal Ltd.	2019	-0.00049262	97519.8	34862.5	121.183	1.31079e+07
Castrol India Ltd.	2019	-0.000533369	1.54295e+06	34862.5	121.183	1.31079e+07
Ceat Ltd.	2019	-0.00109334	348304	34862.5	121.183	1.31079e+07
Central Bank Of India	2019	-0.00299123	833304	34862.5	121.183	1.31079e+07
Central Depository Services (India) Ltd.	2019	-0.000146704	242916	34862.5	121.183	1.31079e+07
Century Plyboards (India) Ltd.	2019	-0.000348153	199155	34862.5	121.183	1.31079e+07
Century Textiles & Inds. Ltd.	2019	-0.00261366	755093	34862.5	121.183	1.31079e+07
Cera Sanitaryware Ltd.	2019	0.000554646	7655.88	34862.5	121.183	1.31079e+07
Chambal Fertilisers & Chemicals Ltd.	2019	-6.77961e-05	315834	34862.5	121.183	1.31079e+07
Cholamandalam Financial Holdings Ltd.	2019	-4.91255e-05	103425	34862.5	121.183	1.31079e+07
Cholamandalam Investment & Finance Co. Ltd.	2019	0.000861158	912482	34862.5	121.183	1.31079e+07
Cipla Ltd.	2019	-0.000299035	2.44469e+06	34862.5	121.183	1.31079e+07
City Union Bank Ltd.	2019	0.000783262	761295	34862.5	121.183	1.31079e+07
Coal India Ltd.	2019	-0.000462359	7.8119e+06	34862.5	121.183	1.31079e+07
Cochin Shipyard Ltd.	2019	0.000340025	88240.7	34862.5	121.183	1.31079e+07
Coforge Ltd.	2019	0.00131025	519667	34862.5	121.183	1.31079e+07
Colgate-Palmolive (India) Ltd.	2019	0.000476216	515226	34862.5	121.183	1.31079e+07
Container Corpn. Of India Ltd.	2019	0.000271014	1.12597e+06	34862.5	121.183	1.31079e+07
Coromandel International Ltd.	2019	0.000683562	168621	34862.5	121.183	1.31079e+07
Creditaccess Grameen Ltd.	2019	0.00282678	0	34862.5	121.183	1.31079e+07
Crisil Ltd.	2019	0.000654441	23505.2	34862.5	121.183	1.31079e+07
Crompton Greaves Consumer Electricals Ltd.	2019	0.000141103	676140	34862.5	121.183	1.31079e+07
Cummins India Ltd.	2019	-0.00175077	512789	34862.5	121.183	1.31079e+07
Cyient Ltd.	2019	-0.00169751	211436	34862.5	121.183	1.31079e+07
D C M Shriram Ltd.	2019	0.000560856	160451	34862.5	121.183	1.31079e+07
D L F Ltd.	2019	0.00117598	1.14635e+07	34862.5	121.183	1.31079e+07
Dabur India Ltd.	2019	0.000392228	2.21504e+06	34862.5	121.183	1.31079e+07
Dalmia Bharat Ltd.	2019	0	0	34862.5	121.183	1.31079e+07
Deepak Nitrite Ltd.	2019	0.00214488	299427	34862.5	121.183	1.31079e+07
Delta Corp Ltd.	2019	-0.000904809	1.2263e+06	34862.5	121.183	1.31079e+07
Dhani Services Ltd.	2019	-0.00256569	1.46831e+06	34862.5	121.183	1.31079e+07
Dilip Buildcon Ltd.	2019	-0.00016587	417767	34862.5	121.183	1.31079e+07
Divi'S Laboratories Ltd.	2019	0.000926687	589877	34862.5	121.183	1.31079e+07
Dixon Technologies (India) Ltd.	2019	0.00259759	20230.9	34862.5	121.183	1.31079e+07
Dr. Lal Pathlabs Ltd.	2019	0.00200015	92562.9	34862.5	121.183	1.31079e+07
Dr. Reddy'S Laboratories Ltd.	2019	0.000408085	714503	34862.5	121.183	1.31079e+07
E I D-Parry (India) Ltd.	2019	-8.81467e-05	190898	34862.5	121.183	1.31079e+07
E I H Ltd.	2019	-0.00113869	206666	34862.5	121.183	1.31079e+07
E P L Ltd.	2019	0.00191654	291048	34862.5	121.183	1.31079e+07
Eclerx Services Ltd.	2019	-0.00266999	46663.5	34862.5	121.183	1.31079e+07
Edelweiss Financial Services Ltd.	2019	-0.00204557	2.53282e+06	34862.5	121.183	1.31079e+07
Eicher Motors Ltd.	2019	0.000252954	141391	34862.5	121.183	1.31079e+07
Elgi Equipments Ltd.	2019	-3.1739e-06	41377.4	34862.5	121.183	1.31079e+07
Emami Ltd.	2019	-0.00126699	636611	34862.5	121.183	1.31079e+07
Endurance Technologies Ltd.	2019	-0.000575886	81296.7	34862.5	121.183	1.31079e+07
Engineers India Ltd.	2019	-0.000951812	1.87625e+06	34862.5	121.183	1.31079e+07
Equitas Holdings Ltd.	2019	-0.000581409	3.33152e+06	34862.5	121.183	1.31079e+07
Eris Lifesciences Ltd.	2019	-0.00142834	83198.9	34862.5	121.183	1.31079e+07
Escorts Ltd.	2019	-0.000473826	2.39539e+06	34862.5	121.183	1.31079e+07
Exide Industries Ltd.	2019	-0.00137804	2.02848e+06	34862.5	121.183	1.31079e+07
F D C Ltd.	2019	0.000829679	79318.5	34862.5	121.183	1.31079e+07
Federal Bank Ltd.	2019	-0.000306126	1.2257e+07	34862.5	121.183	1.31079e+07
Fertilisers & Chemicals, Travancore Ltd.	2019	-0.000141632	166213	34862.5	121.183	1.31079e+07
Fine Organic Inds. Ltd.	2019	0.00196263	0	34862.5	121.183	1.31079e+07
Finolex Cables Ltd.	2019	-0.000817114	81358.7	34862.5	121.183	1.31079e+07
Finolex Industries Ltd.	2019	9.25837e-05	38524.5	34862.5	121.183	1.31079e+07
Firstsource Solutions Ltd.	2019	-0.000667313	1.85315e+06	34862.5	121.183	1.31079e+07
Fortis Healthcare Ltd.	2019	-0.00025781	1.23065e+06	34862.5	121.183	1.31079e+07
G A I L (India) Ltd.	2019	-0.00150791	7.08707e+06	34862.5	121.183	1.31079e+07
G M M Pfaudler Ltd.	2019	0.0018673	0	34862.5	121.183	1.31079e+07
Galaxy Surfactants Ltd.	2019	0.000859582	0	34862.5	121.183	1.31079e+07
Garware Technical Fibres Ltd.	2019	2.56862e-05	9284.57	34862.5	121.183	1.31079e+07
General Insurance Corpn. Of India	2019	-0.000523788	270343	34862.5	121.183	1.31079e+07
Glaxosmithkline Pharmaceuticals Ltd.	2019	0.000296286	31804.3	34862.5	121.183	1.31079e+07
Glenmark Pharmaceuticals Ltd.	2019	-0.00275897	1.59763e+06	34862.5	121.183	1.31079e+07
Godfrey Phillips India Ltd.	2019	0.00155926	205205	34862.5	121.183	1.31079e+07
Godrej Agrovet Ltd.	2019	0.000140566	77526.3	34862.5	121.183	1.31079e+07
Godrej Consumer Products Ltd.	2019	-0.000669911	1.12487e+06	34862.5	121.183	1.31079e+07
Godrej Industries Ltd.	2019	-0.000968544	277250	34862.5	121.183	1.31079e+07
Godrej Properties Ltd.	2019	0.00158778	387306	34862.5	121.183	1.31079e+07
Granules India Ltd.	2019	0.00128285	938638	34862.5	121.183	1.31079e+07
Graphite India Ltd.	2019	-0.00368153	1.80106e+06	34862.5	121.183	1.31079e+07
Grasim Industries Ltd.	2019	-0.000376453	1.77851e+06	34862.5	121.183	1.31079e+07
Great Eastern Shipping Co. Ltd.	2019	-0.000277096	90492.4	34862.5	121.183	1.31079e+07
Grindwell Norton Ltd.	2019	0.000335898	15739.9	34862.5	121.183	1.31079e+07
Gujarat Alkalies & Chemicals Ltd.	2019	-0.00105396	47180.6	34862.5	121.183	1.31079e+07
Gujarat Ambuja Exports Ltd.	2019	-0.00254299	40338.3	34862.5	121.183	1.31079e+07
Gujarat Gas Ltd.	2019	0.00233963	605479	34862.5	121.183	1.31079e+07
Gujarat Narmada Valley Fertilizers & Chemicals Ltd.	2019	-0.00301894	330880	34862.5	121.183	1.31079e+07
Gujarat Pipavav Port Ltd.	2019	-0.000593017	346936	34862.5	121.183	1.31079e+07
Gujarat State Fertilizers & Chemicals Ltd.	2019	-0.00191182	789449	34862.5	121.183	1.31079e+07
Gujarat State Petronet Ltd.	2019	0.000900344	521368	34862.5	121.183	1.31079e+07
H C L Technologies Ltd.	2019	0.000746211	1.9247e+06	34862.5	121.183	1.31079e+07
H D F C Asset Mgmt. Co. Ltd.	2019	0.00307578	0	34862.5	121.183	1.31079e+07
H D F C Bank Ltd.	2019	0.000728158	4.22384e+06	34862.5	121.183	1.31079e+07
H D F C Life Insurance Co. Ltd.	2019	0.00191975	3.39168e+06	34862.5	121.183	1.31079e+07
H E G Ltd.	2019	-0.00505539	440902	34862.5	121.183	1.31079e+07
H F C L Ltd.	2019	-0.000771213	2.26115e+06	34862.5	121.183	1.31079e+07
Hathway Cable & Datacom Ltd.	2019	-0.00171861	743344	34862.5	121.183	1.31079e+07
Hatsun Agro Products Ltd.	2019	-0.000302806	22859.2	34862.5	121.183	1.31079e+07
Havells India Ltd.	2019	-0.000272322	1.32484e+06	34862.5	121.183	1.31079e+07
Hero Motocorp Ltd.	2019	-0.000901072	842038	34862.5	121.183	1.31079e+07
Hikal Ltd.	2019	-0.00128126	183230	34862.5	121.183	1.31079e+07
Hindalco Industries Ltd.	2019	3.03257e-05	7.52881e+06	34862.5	121.183	1.31079e+07
Hinduja Global Solutions Ltd.	2019	-0.000451206	9591.36	34862.5	121.183	1.31079e+07
Hindustan Aeronautics Ltd.	2019	-0.000370998	0	34862.5	121.183	1.31079e+07
Hindustan Copper Ltd.	2019	-0.00105284	825006	34862.5	121.183	1.31079e+07
Hindustan Petroleum Corpn. Ltd.	2019	0.000124562	5.70181e+06	34862.5	121.183	1.31079e+07
Hindustan Unilever Ltd.	2019	0.000304866	1.42921e+06	34862.5	121.183	1.31079e+07
Hindustan Zinc Ltd.	2019	-0.00107394	775696	34862.5	121.183	1.31079e+07
Honeywell Automation India Ltd.	2019	0.000941188	1886.92	34862.5	121.183	1.31079e+07
Housing & Urban Devp. Corpn. Ltd.	2019	-0.000729045	1.03804e+06	34862.5	121.183	1.31079e+07
Housing Development Finance Corpn. Ltd.	2019	0.00080514	3.41554e+06	34862.5	121.183	1.31079e+07
I C I C I Bank Ltd.	2019	0.00159481	2.01796e+07	34862.5	121.183	1.31079e+07
I C I C I Lombard General Insurance Co. Ltd.	2019	0.00187762	830645	34862.5	121.183	1.31079e+07
I C I C I Prudential Life Insurance Co. Ltd.	2019	0.00167829	2.51425e+06	34862.5	121.183	1.31079e+07
I C I C I Securities Ltd.	2019	0.0017896	0	34862.5	121.183	1.31079e+07
I D B I Bank Ltd.	2019	-0.00206399	7.04524e+06	34862.5	121.183	1.31079e+07
I D F C First Bank Ltd.	2019	0.00022772	1.59954e+07	34862.5	121.183	1.31079e+07
I D F C Ltd.	2019	-0.000290952	3.58927e+06	34862.5	121.183	1.31079e+07
I F B Industries Ltd.	2019	-0.000968368	11843.2	34862.5	121.183	1.31079e+07
I I F L Finance Ltd.	2019	-0.00518615	214380	34862.5	121.183	1.31079e+07
I R B Infrastructure Developers Ltd.	2019	-0.00309559	2.23741e+06	34862.5	121.183	1.31079e+07
I T C Ltd.	2019	-0.000677228	12960638	34862.5	121.183	1.31079e+07
I T I Ltd.	2019	-3.95212e-05	1.08772e+06	34862.5	121.183	1.31079e+07
India Cements Ltd.	2019	-0.00111592	4.35038e+06	34862.5	121.183	1.31079e+07
Indiabulls Housing Finance Ltd.	2019	-0.00403794	2.40367e+07	34862.5	121.183	1.31079e+07
Indiabulls Real Estate Ltd.	2019	-0.00116562	5.33114e+06	34862.5	121.183	1.31079e+07
Indian Bank	2019	-0.00363305	1.7088e+06	34862.5	121.183	1.31079e+07
Indian Energy Exchange Ltd.	2019	-0.000580883	349815	34862.5	121.183	1.31079e+07
Indian Hotels Co. Ltd.	2019	8.95163e-05	1.20194e+06	34862.5	121.183	1.31079e+07
Indian Oil Corpn. Ltd.	2019	-0.000363673	1.26844e+07	34862.5	121.183	1.31079e+07
Indian Overseas Bank	2019	-0.00112881	852119	34862.5	121.183	1.31079e+07
Indo Count Inds. Ltd.	2019	-0.000722993	223298	34862.5	121.183	1.31079e+07
Indoco Remedies Ltd.	2019	-0.000545692	46436.7	34862.5	121.183	1.31079e+07
Indraprastha Gas Ltd.	2019	0.00180176	1.98723e+06	34862.5	121.183	1.31079e+07
Indus Towers Ltd.	2019	-0.000185651	5.61362e+06	34862.5	121.183	1.31079e+07
Indusind Bank Ltd.	2019	-0.000176167	4.01347e+06	34862.5	121.183	1.31079e+07
Infibeam Avenues Ltd.	2019	0.000705145	6.43703e+06	34862.5	121.183	1.31079e+07
Info Edge (India) Ltd.	2019	0.00232755	281855	34862.5	121.183	1.31079e+07
Infosys Ltd.	2019	0.000362285	9.07066e+06	34862.5	121.183	1.31079e+07
Inox Leisure Ltd.	2019	0.00178759	241885	34862.5	121.183	1.31079e+07
Intellect Design Arena Ltd.	2019	-0.001954	309827	34862.5	121.183	1.31079e+07
Interglobe Aviation Ltd.	2019	0.000565563	1.81504e+06	34862.5	121.183	1.31079e+07
Ipca Laboratories Ltd.	2019	0.0014329	183419	34862.5	121.183	1.31079e+07
Ircon International Ltd.	2019	-0.000345407	0	34862.5	121.183	1.31079e+07
J B Chemicals & Pharmaceuticals Ltd.	2019	0.00127567	72078.1	34862.5	121.183	1.31079e+07
J K Cement Ltd.	2019	0.00193732	53026.7	34862.5	121.183	1.31079e+07
J K Lakshmi Cement Ltd.	2019	-0.000472396	87482.2	34862.5	121.183	1.31079e+07
J K Paper Ltd.	2019	-0.000833826	982198	34862.5	121.183	1.31079e+07
J M Financial Ltd.	2019	0.000197519	560729	34862.5	121.183	1.31079e+07
J S W Energy Ltd.	2019	-6.4233e-05	838670	34862.5	121.183	1.31079e+07
J S W Steel Ltd.	2019	-0.000272575	7.28581e+06	34862.5	121.183	1.31079e+07
Jamna Auto Inds. Ltd.	2019	-0.00129503	742990	34862.5	121.183	1.31079e+07
Jindal Stainless (Hisar) Ltd.	2019	-0.000672504	263768	34862.5	121.183	1.31079e+07
Jindal Stainless Ltd.	2019	0.00054729	479214	34862.5	121.183	1.31079e+07
Jindal Steel & Power Ltd.	2019	0.000238027	1.68712e+07	34862.5	121.183	1.31079e+07
Jubilant Foodworks Ltd.	2019	0.00117446	1.429e+06	34862.5	121.183	1.31079e+07
Jubilant Pharmova Ltd.	2019	-0.00113267	416578	34862.5	121.183	1.31079e+07
Just Dial Ltd.	2019	0.00058013	3.0413e+06	34862.5	121.183	1.31079e+07
Jyothy Labs Ltd.	2019	-0.0013365	291165	34862.5	121.183	1.31079e+07
K E C International Ltd.	2019	4.0742e-05	346768	34862.5	121.183	1.31079e+07
K N R Constructions Ltd.	2019	0.000620743	119158	34862.5	121.183	1.31079e+07
K P R Mill Ltd.	2019	0.000695061	26882.6	34862.5	121.183	1.31079e+07
K R B L Ltd.	2019	-8.35327e-05	203268	34862.5	121.183	1.31079e+07
Kajaria Ceramics Ltd.	2019	0.000246258	488392	34862.5	121.183	1.31079e+07
Kalpataru Power Transmission Ltd.	2019	0.000315778	123781	34862.5	121.183	1.31079e+07
Kansai Nerolac Paints Ltd.	2019	0.000323088	193889	34862.5	121.183	1.31079e+07
Karur Vysya Bank Ltd.	2019	-0.00171659	1.05444e+06	34862.5	121.183	1.31079e+07
Kei Industries Ltd.	2019	0.00100255	160102	34862.5	121.183	1.31079e+07
Kotak Mahindra Bank Ltd.	2019	0.0012481	2.973e+06	34862.5	121.183	1.31079e+07
L & T Finance Holdings Ltd.	2019	-0.000974116	8.76447e+06	34862.5	121.183	1.31079e+07
L & T Technology Services Ltd.	2019	-0.000601955	107349	34862.5	121.183	1.31079e+07
L I C Housing Finance Ltd.	2019	-0.00037691	2.33054e+06	34862.5	121.183	1.31079e+07
Lakshmi Machine Works Ltd.	2019	-0.00225365	4125.02	34862.5	121.183	1.31079e+07
Larsen & Toubro Infotech Ltd.	2019	3.97148e-05	147977	34862.5	121.183	1.31079e+07
Larsen & Toubro Ltd.	2019	-0.000381812	3.0683e+06	34862.5	121.183	1.31079e+07
Laurus Labs Ltd.	2019	-0.000212224	81252.6	34862.5	121.183	1.31079e+07
Linde India Ltd.	2019	-0.000111991	131653	34862.5	121.183	1.31079e+07
Lupin Ltd.	2019	-0.000354881	1.63864e+06	34862.5	121.183	1.31079e+07
Lux Industries Ltd.	2019	-0.000197683	58609.4	34862.5	121.183	1.31079e+07
M M T C Ltd.	2019	-0.00195225	1.05874e+06	34862.5	121.183	1.31079e+07
M O I L Ltd.	2019	-0.000598825	187902	34862.5	121.183	1.31079e+07
M R F Ltd.	2019	-1.87374e-05	6147.04	34862.5	121.183	1.31079e+07
Mahanagar Gas Ltd.	2019	0.000686942	493518	34862.5	121.183	1.31079e+07
Mahindra & Mahindra Financial Services Ltd.	2019	-0.00150382	1.97019e+06	34862.5	121.183	1.31079e+07
Mahindra & Mahindra Ltd.	2019	-0.00135979	3.61454e+06	34862.5	121.183	1.31079e+07
Mahindra C I E Automotive Ltd.	2019	-0.00166939	185060	34862.5	121.183	1.31079e+07
Mahindra Holidays & Resorts India Ltd.	2019	0.00030557	48389.9	34862.5	121.183	1.31079e+07
Mahindra Logistics Ltd.	2019	-0.00100945	49431.9	34862.5	121.183	1.31079e+07
Manappuram Finance Ltd.	2019	0.00266237	4.25592e+06	34862.5	121.183	1.31079e+07
Mangalore Refinery & Petrochemicals Ltd.	2019	-0.00203199	770140	34862.5	121.183	1.31079e+07
Marico Ltd.	2019	-0.000357289	1.85189e+06	34862.5	121.183	1.31079e+07
Maruti Suzuki India Ltd.	2019	5.61927e-05	1.00139e+06	34862.5	121.183	1.31079e+07
Mastek Ltd.	2019	-0.00032663	102174	34862.5	121.183	1.31079e+07
Max Financial Services Ltd.	2019	0.00090135	866200	34862.5	121.183	1.31079e+07
Minda Industries Ltd.	2019	0.000285236	159526	34862.5	121.183	1.31079e+07
Mindtree Ltd.	2019	-0.000296793	1.18633e+06	34862.5	121.183	1.31079e+07
Motilal Oswal Financial Services Ltd.	2019	0.000471788	120207	34862.5	121.183	1.31079e+07
Mphasis Ltd.	2019	-0.000286867	213882	34862.5	121.183	1.31079e+07
Multi Commodity Exchange Of India Ltd.	2019	0.0019438	622851	34862.5	121.183	1.31079e+07
Muthoot Finance Ltd.	2019	0.00169848	1.04168e+06	34862.5	121.183	1.31079e+07
N B C C (India) Ltd.	2019	-0.00207914	1.26017e+07	34862.5	121.183	1.31079e+07
N C C Ltd.	2019	-0.00191838	1.36967e+07	34862.5	121.183	1.31079e+07
N H P C Ltd.	2019	-0.000279899	3.76166e+06	34862.5	121.183	1.31079e+07
N L C India Ltd.	2019	-0.000724482	607213	34862.5	121.183	1.31079e+07
N M D C Ltd.	2019	0.00116894	5.37167e+06	34862.5	121.183	1.31079e+07
N T P C Ltd.	2019	-0.000116602	1.21903e+07	34862.5	121.183	1.31079e+07
Narayana Hrudayalaya Ltd.	2019	0.00189006	112470	34862.5	121.183	1.31079e+07
Natco Pharma Ltd.	2019	-0.000666402	188653	34862.5	121.183	1.31079e+07
National Aluminium Co. Ltd.	2019	-0.00155877	9.52806e+06	34862.5	121.183	1.31079e+07
Navin Fluorine Intl. Ltd.	2019	0.00148409	51505.6	34862.5	121.183	1.31079e+07
Nesco Ltd.	2019	0.00162664	29664.4	34862.5	121.183	1.31079e+07
Nestle India Ltd.	2019	0.00119399	82142.6	34862.5	121.183	1.31079e+07
Network18 Media & Invst. Ltd.	2019	-0.002085	381875	34862.5	121.183	1.31079e+07
New India Assurance Co. Ltd.	2019	-0.00126805	224130	34862.5	121.183	1.31079e+07
Nippon Life India Asset Mgmt. Ltd.	2019	0.00328553	1.43983e+06	34862.5	121.183	1.31079e+07
Nocil Ltd.	2019	-0.00195466	572870	34862.5	121.183	1.31079e+07
Oberoi Realty Ltd.	2019	0.000696073	473748	34862.5	121.183	1.31079e+07
Oil & Natural Gas Corpn. Ltd.	2019	-0.000540865	1.18202e+07	34862.5	121.183	1.31079e+07
Oil India Ltd.	2019	-0.000485929	1.36615e+06	34862.5	121.183	1.31079e+07
Oracle Financial Services Software Ltd.	2019	-0.0012386	27346.1	34862.5	121.183	1.31079e+07
Orient Electric Ltd.	2019	0.00100521	0	34862.5	121.183	1.31079e+07
P C B L Ltd.	2019	-0.00228242	856367	34862.5	121.183	1.31079e+07
P I Industries Ltd.	2019	0.00210122	133808	34862.5	121.183	1.31079e+07
P N B Housing Finance Ltd.	2019	-0.0030641	494753	34862.5	121.183	1.31079e+07
P N C Infratech Ltd.	2019	0.000975728	208347	34862.5	121.183	1.31079e+07
P V R Ltd.	2019	0.000729888	428414	34862.5	121.183	1.31079e+07
Page Industries Ltd.	2019	-0.000203859	35716	34862.5	121.183	1.31079e+07
Persistent Systems Ltd.	2019	0.000307678	150239	34862.5	121.183	1.31079e+07
Petronet L N G Ltd.	2019	0.000644703	2.9314e+06	34862.5	121.183	1.31079e+07
Pfizer Ltd.	2019	0.00164991	24369	34862.5	121.183	1.31079e+07
Phoenix Mills Ltd.	2019	0.00151499	103244	34862.5	121.183	1.31079e+07
Pidilite Industries Ltd.	2019	0.000917675	590542	34862.5	121.183	1.31079e+07
Piramal Enterprises Ltd.	2019	-0.00165943	1.06374e+06	34862.5	121.183	1.31079e+07
Poly Medicure Ltd.	2019	-0.000124436	14346.5	34862.5	121.183	1.31079e+07
Polyplex Corporation Ltd.	2019	-6.31162e-05	45421.4	34862.5	121.183	1.31079e+07
Poonawalla Fincorp Ltd.	2019	-0.00280065	337307	34862.5	121.183	1.31079e+07
Power Finance Corpn. Ltd.	2019	0.000510062	7.85556e+06	34862.5	121.183	1.31079e+07
Power Grid Corpn. Of India Ltd.	2019	-0.000105883	6.71873e+06	34862.5	121.183	1.31079e+07
Praj Industries Ltd.	2019	-0.000419482	2.35005e+06	34862.5	121.183	1.31079e+07
Prestige Estates Projects Ltd.	2019	0.00154722	454833	34862.5	121.183	1.31079e+07
Prism Johnson Ltd.	2019	-0.0013817	298967	34862.5	121.183	1.31079e+07
Privi Speciality Chemicals Ltd.	2019	0.00129115	0	34862.5	121.183	1.31079e+07
Procter & Gamble Health Ltd.	2019	0.0014836	26230.7	34862.5	121.183	1.31079e+07
Procter & Gamble Hygiene & Health Care Ltd.	2019	0.000594686	5276.49	34862.5	121.183	1.31079e+07
Punjab National Bank	2019	-0.000777335	2.64569e+07	34862.5	121.183	1.31079e+07
Quess Corp Ltd.	2019	-0.00155938	220873	34862.5	121.183	1.31079e+07
R B L Bank Ltd.	2019	-0.00201661	7.58774e+06	34862.5	121.183	1.31079e+07
R E C Ltd.	2019	0.000751021	7.3363e+06	34862.5	121.183	1.31079e+07
R H I Magnesita India Ltd.	2019	8.80993e-05	33156.8	34862.5	121.183	1.31079e+07
Radico Khaitan Ltd.	2019	-0.000997612	450470	34862.5	121.183	1.31079e+07
Rain Industries Ltd.	2019	-0.00117525	1.2201e+06	34862.5	121.183	1.31079e+07
Rajesh Exports Ltd.	2019	0.000638293	309564	34862.5	121.183	1.31079e+07
Rallis India Ltd.	2019	-0.000208147	205023	34862.5	121.183	1.31079e+07
Ramco Cements Ltd.	2019	0.000684731	320847	34862.5	121.183	1.31079e+07
Rashtriya Chemicals & Fertilizers Ltd.	2019	-0.0012799	1.08778e+06	34862.5	121.183	1.31079e+07
Ratnamani Metals & Tubes Ltd.	2019	0.000636282	24839.2	34862.5	121.183	1.31079e+07
Rattanindia Enterprises Ltd.	2019	-0.00243478	0	34862.5	121.183	1.31079e+07
Redington (India) Ltd.	2019	0.00122769	349000	34862.5	121.183	1.31079e+07
Relaxo Footwears Ltd.	2019	0.00208467	111092	34862.5	121.183	1.31079e+07
Reliance Industries Ltd.	2019	0.00128031	8.98639e+06	34862.5	121.183	1.31079e+07
Rites Ltd.	2019	0.00123691	0	34862.5	121.183	1.31079e+07
S B I Life Insurance Co. Ltd.	2019	0.00191363	1.50861e+06	34862.5	121.183	1.31079e+07
S I S Ltd.	2019	0.00106228	22149.3	34862.5	121.183	1.31079e+07
S J V N Ltd.	2019	-4.78322e-05	1.52573e+06	34862.5	121.183	1.31079e+07
S K F India Ltd.	2019	0.000537033	20089.4	34862.5	121.183	1.31079e+07
S R F Ltd.	2019	0.00222499	373879	34862.5	121.183	1.31079e+07
Sanofi India Ltd.	2019	0.000476362	13774.4	34862.5	121.183	1.31079e+07
Saregama India Ltd.	2019	-0.00132483	0	34862.5	121.183	1.31079e+07
Schaeffler India Ltd.	2019	-0.000779751	7274.52	34862.5	121.183	1.31079e+07
Sequent Scientific Ltd.	2019	0.0002194	489745	34862.5	121.183	1.31079e+07
Sheela Foam Ltd.	2019	-0.000596924	16023.4	34862.5	121.183	1.31079e+07
Shilpa Medicare Ltd.	2019	-0.00123578	31025.6	34862.5	121.183	1.31079e+07
Shipping Corpn. Of India Ltd.	2019	0.00115669	1.82663e+06	34862.5	121.183	1.31079e+07
Shree Cement Ltd.	2019	0.000751394	26319.6	34862.5	121.183	1.31079e+07
Shree Renuka Sugars Ltd.	2019	-0.00103917	0	34862.5	121.183	1.31079e+07
Shriram City Union Finance Ltd.	2019	-0.000539382	17557.3	34862.5	121.183	1.31079e+07
Shriram Transport Finance Co. Ltd.	2019	-8.38377e-05	1.39591e+06	34862.5	121.183	1.31079e+07
Siemens Ltd.	2019	0.00142144	560513	34862.5	121.183	1.31079e+07
Sobha Ltd.	2019	-0.000673673	214913	34862.5	121.183	1.31079e+07
Solar Industries India Ltd.	2019	-5.58168e-05	17106.6	34862.5	121.183	1.31079e+07
Solara Active Pharma Sciences Ltd.	2019	0.00144323	0	34862.5	121.183	1.31079e+07
Sonata Software Ltd.	2019	0.000102255	105897	34862.5	121.183	1.31079e+07
State Bank Of India	2019	0.00051899	2.82281e+07	34862.5	121.183	1.31079e+07
Steel Authority Of India Ltd.	2019	-0.000939234	2.47588e+07	34862.5	121.183	1.31079e+07
Sterlite Technologies Ltd.	2019	-0.00370643	1.91135e+06	34862.5	121.183	1.31079e+07
Strides Pharma Science Ltd.	2019	-0.000964229	1.31776e+06	34862.5	121.183	1.31079e+07
Sudarshan Chemical Inds. Ltd.	2019	0.000663166	66206.5	34862.5	121.183	1.31079e+07
Sun Pharma Advanced Research Co. Ltd.	2019	-0.00080705	952172	34862.5	121.183	1.31079e+07
Sun Pharmaceutical Inds. Ltd.	2019	-7.0165e-05	7.57192e+06	34862.5	121.183	1.31079e+07
Sun T V Network Ltd.	2019	-0.00128045	2.05666e+06	34862.5	121.183	1.31079e+07
Sundaram Finance Ltd.	2019	0.000447656	35814.8	34862.5	121.183	1.31079e+07
Sundram Fasteners Ltd.	2019	-0.000267349	73120.7	34862.5	121.183	1.31079e+07
Sunteck Realty Ltd.	2019	0.000708239	187401	34862.5	121.183	1.31079e+07
Suprajit Engineering Ltd.	2019	-0.000682649	63903.9	34862.5	121.183	1.31079e+07
Supreme Industries Ltd.	2019	9.36126e-05	58238	34862.5	121.183	1.31079e+07
Supreme Petrochem Ltd.	2019	-0.00108013	12805.6	34862.5	121.183	1.31079e+07
Suzlon Energy Ltd.	2019	-0.00433433	3.72437e+07	34862.5	121.183	1.31079e+07
[truncated: 930 more rows]

## Sheet: 2017 NSE
Company_Name	YEAR	Adjusted_Return	Adjusted_Share Traded	Gold_Price	WPI_INDEX	GDP_YEAR
[truncated: 434 more rows]

[truncated: 4 more sheets: 2018 NSE, 2019 NSE, 2020 NSE, 2021 NSE]
